# Supplementary material for: Characterization and functional biology of the soybean aleurone layer
Source: BMC Plant Biol. 2018 Dec 13;18:354. doi: 10.1186/s12870-018-1579-8 (PMC6293662; doi:10.1186/s12870-018-1579-8)
Supplement: Supplementary file 3 — Table S2. The metabolites detected in the aleurone and cotyledonary soybean tissue. Shown is metabolic profiling of the cotyledon and aleurone tissues. Major metabolites detected in the cotyledon and aleurone tissues were grouped into those metabolites with higher levels in the aleurone, most sugars for instance, and those with higher abundance in the cotyledon, amino acids and asparagine. (XLSX 2135 kb) [file 12870_2018_1579_MOESM3_ESM.xlsx]

## Sheet: Explanation
	OrigScale		Values are normalized in terms of raw area counts.
	ScaledImpData		Each biochemical in OrigScale is rescaled to set the median equal to 1.
			Then, missing values are imputed with the minimum.
	Pathway Heat Map		This is the heat map associated with the statistical analysis of the data.
			Indicates ratios, p- and q-values for each comparison.
			0.55	Green: indicates significant difference (p≤0.05) between the groups shown, metabolite ratio of < 1.00
			0.76	Light Green: narrowly missed statistical cutoff for significance 0.05<p<0.10, metabolite ratio of < 1.00
			1.71	Red: indicates significant difference (p≤0.05) between the groups shown; metabolite ratio of ≥ 1.00
			1.32	Light Red: narrowly missed statistical cutoff for significance 0.05<p<0.10, metabolite ratio of ≥ 1.00
			1.2	Non-colored text and cell: mean values are not significantly different for that comparison
		* indicates compounds that have not been officially confirmed based on a standard, but we are confident in its identity
	Box Plots - Alpha		Box plots are provided for each biochemical detected, sorted alphabetically by biochemical name.
	Box Plots - Pathway		Box plots are provided for each biochemical detected, sorted by biochemical pathway.

## Sheet: Original Scaled Data
														SAMPLE NAME	UNAZ-00414	UNAZ-00415	UNAZ-00416	UNAZ-00417	UNAZ-00418	UNAZ-00419	UNAZ-00420	UNAZ-00421	UNAZ-00422	UNAZ-00423	UNAZ-00424	UNAZ-00425	UNAZ-00426	UNAZ-00427	UNAZ-00428	UNAZ-00429	UNAZ-00430	UNAZ-00431	UNAZ-00432	UNAZ-00433	UNAZ-00434	UNAZ-00435	UNAZ-00436	UNAZ-00437	UNAZ-00438	UNAZ-00439	UNAZ-00440	UNAZ-00441	UNAZ-00442	UNAZ-00443
														CLIENT IDENTIFIER	1_1	1_2	1_3	1_4	2_1	2_2	2_3	3_1	3_2	3_3	4_1	4_2	4_3	5_1	5_2	5_3	6_1	6_2	6_3	7_1	7_2	7_3	8_1	8_2	8_3	8_4	9_1	9_2	9_3	9_4
														SAMPLE ID	3109190	3109184	3109209	3109214	3109193	3109191	3109212	3109181	3109194	3109210	3109208	3109207	3109188	3109195	3109205	3109200	3109182	3109196	3109186	3109192	3109202	3109211	3109201	3109185	3109187	3109199	3109197	3109183	3109203	3109204
														PARENT SAMPLE ID	3088056	3088057	3088058	3088059	3088060	3088061	3088062	3088063	3088064	3088065	3088066	3088067	3088068	3088069	3088070	3088071	3088072	3088073	3088074	3088075	3088076	3088077	3088078	3088079	3088080	3088081	3088082	3088083	3088084	3088085
														BRADFORD PROTEIN	14.319				24.883			14.201			18.072			23.439			20.712			27.893			1.291			1.785
														CLIENT MATRIX	seed	seed	seed	seed	seed	seed	seed	seed	seed	seed	seed	seed	seed	seed	seed	seed	seed	seed	seed	seed	seed	seed	aleurone	aleurone	aleurone	aleurone	Aleurone	Aleurone	Aleurone	Aleurone
														GROUP	Jack Control	Jack Control	Jack Control	Jack Control	AiP7	AiP7	AiP7	AiP10	AiP10	AiP10	AiPR4	AiPR4	AiPR4	ATB2	ATB2	ATB2	ATB33	ATB33	ATB33	ATBR4	ATBR4	ATBR4	Jack Aleu	Jack Aleu	Jack Aleu	Jack Aleu	SP	SP	SP	SP
														GROUP DESCRIPTION					1 ABA signal	1 ABA signal	1 ABA signal							2 sugar control	2 sugar control	2 sugar control							Aleurone	Aleurone	Aleurone	Aleurone
														GROUP NUMBER	1, 2, 3	1, 2, 3	1, 2, 3	1, 2, 3	1	1	1	1	1	1	1	1	1	2	2	2	2	2	2	2	2	2	3	3	3	3	3	3	3	3
														SAMPLE NUMBER	1	1	1	1	2	2	2	3	3	3	4	4	4	5	5	5	6	6	6	7	7	7	8	8	8	8	9	9	9	9
PATHWAY ORDER	ALPHA	COMP ID	PLATFORM	CHEMICAL ID	RI	MASS	CAS	PUBCHEM	KEGG	HMDB	PLANTCYC	SUPER PATHWAY	SUB PATHWAY	BIOCHEMICAL	UNAZ-00414	UNAZ-00415	UNAZ-00416	UNAZ-00417	UNAZ-00418	UNAZ-00419	UNAZ-00420	UNAZ-00421	UNAZ-00422	UNAZ-00423	UNAZ-00424	UNAZ-00425	UNAZ-00426	UNAZ-00427	UNAZ-00428	UNAZ-00429	UNAZ-00430	UNAZ-00431	UNAZ-00432	UNAZ-00433	UNAZ-00434	UNAZ-00435	UNAZ-00436	UNAZ-00437	UNAZ-00438	UNAZ-00439	UNAZ-00440	UNAZ-00441	UNAZ-00442	UNAZ-00443
2	160	3141	LC/MS Pos Early	799	1064	118.086	107-43-7	247	C00719	HMDB00043	BETAINE	Amino acid	Serine family (phosphoglycerate derived)	betaine	627745600	658510400	667859904	619760640	650446336	633675584	638184640	738960000	698997184	699028672	621755776	645691648	643204928	1862438144	1868558336	1868432768	780942848	784871936	781789120	861605120	893086592	912098816	26396162	22621786	22555424	23056756	37786128	41489296	40166680	37360332
4	174	1868	LC/MS Pos Early	800	1488	122.027	52-90-4;56-89-3	5862	C00097	HMDB00574	CYS	Amino acid	Serine family (phosphoglycerate derived)	cysteine	717721	802645	1061563	889398	2071914	2218715	2011316	1382740	1256009	1604135	847356	893400	915204	3.60581e+06	3249257	2559976	784125	648299	798712	1121803	1464822	1507086	248313	208002	281974	265888	384844	362859	398060	266506
7	188	5086	LC/MS Pos Early	806	1104	104.071	1118-68-9	673	C01026	HMDB00092		Amino acid	Serine family (phosphoglycerate derived)	dimethylglycine	1590702	1517246	1543126	1721738	3848472	4027141	2348126	1911383	1260293	1448536	2958156	3327322	2706021	4108974	3743816	3376200	1836850	1299445	2165489	1668119	2109420	2054015
8	238	58	LC/MS Pos Early	340	1375	76.0393	56-40-6	750	C00037	HMDB00123	GLY	Amino acid	Serine family (phosphoglycerate derived)	glycine	16690524	17420956	18544880	16774988	78965704	76812496	76743384	21602024	20622064	19259944	36660424	37328484	37599020	37841780	37509068	37100732	20721532	21426900	20903506	28855328	29503890	31397920	38036460	34493984	33292558	32852172	45738244	50145804	47558808	39869328
13	322	37076	LC/MS Pos Early	100001851	811	148.06	97-14-3	65249		HMDB02931	ACETYLSERINE	Amino acid	Serine family (phosphoglycerate derived)	N-acetylserine	2944203	2959096	3025078	3178648	4350228	4318376	4914334	3988998	4298960	3.95121e+06	2858856	2698432	2926455	6618712	6443306	6240444	3.86683e+06	4006764	3.77342e+06	3729812	3582890	3337693	3.66405e+06	3276549	3593785	3444388	2836477	2907442	3006938	2797463
16	391	1648	LC/MS Pos Early	503	1239	106.05	56-45-1	5951	C00065	HMDB00187	SER	Amino acid	Serine family (phosphoglycerate derived)	serine	75388000	80697640	73139512	77248696	367265536	367689952	398979104	103803960	107508168	103508496	176996176	168339680	179978560	198345040	197047648	212715024	125875640	124137312	125882552	134369680	134243104	125160080	155286208	144351632	141140304	141631248	183294000	199403968	184318928	181220944
19	389	47897	LC/MS Pos Early	100002324	1490	180.033	638-23-3	1080	C03727	HMDB29415		Amino acid	Serine family (phosphoglycerate derived)	S-carboxymethyl-L-cysteine	94080	136848	131462	206642	266375	413757	440848	175757	250127	174716	281531	297965	249586	710613	739878	627533	169693	159517	147310	189275	227338	168790	1934649	2.48159e+06	2279713	2613110	3451005	3146632	2932451	3275752
24	407	46960	LC/MS Neg	100002528	616	96.9601	14808-79-8	1118	C00059	HMDB01448		Amino acid	Serine family (phosphoglycerate derived)	sulfate*	35959012	35856060	35898952	37422388	70609776	73883824	73176552	36471664	32355832	32318600	18069162	18010984	18592238	105091192	95733648	106219296	40143728	40326204	41852436	100493160	98571128	99599136	21660698	20166986	20367526	18601148	28624732	30704980	28396994	25998616
31	93	53229	LC/MS Pos Early	100009246	1652	120.066		94309				Amino acid	Serine family (phosphoglycerate derived)	2-methylserine	8917872	9911917	9707620	8759639	18130320	18931736	16538930	11065370	9754381	9722193	12921251	14015117	14146981	16102796	16909654	16926622	7890201	7847312	8.06054e+06	10062068	10647761	11060178	1.77775e+06	1593215	1263012	1385812	2687112	2914057	2415693	2155990
32	98	32197	LC/MS Neg	240	1379	181.051	6482-98-0	9378	C03672	HMDB00755	CPD-2222	Amino acid	Aromatic amino acid metabolism (PEP derived)	3-(4-hydroxyphenyl)lactate	211107	215120	181031	216600	814213	941639	866947	106917	76972	85451	77894	122895	72701	101761	72803	93064	67995	93846	103873	163244	215426	178040	110626	90814	116984	96732	129267	134038	164566	125966
39	117	1669	LC/MS Neg	1141	1690.1	179.035	156-39-8	979	C01179	HMDB00707	P-HYDROXY-PHENYLPYRUVATE	Amino acid	Aromatic amino acid metabolism (PEP derived)	4-hydroxyphenylpyruvate	367186	426691	345401	527924	570177	933433	663388	355410	271986	302581	232519	251499	184113	686218	622513	561967	309870	400148	281196	440119	675782	384542	237421	251172	180451	196907	96855	91827	77415	87734
42	146	4970	LC/MS Pos Early	1258	2606	138.055	118-92-3	227	C00108	HMDB01123	ANTHRANILATE	Amino acid	Aromatic amino acid metabolism (PEP derived)	anthranilate																							667485	413088	325480	510442
51	270	1417	LC/MS Neg	98	2224	188.035	492-27-3	3845	C01717	HMDB00715		Amino acid	Aromatic amino acid metabolism (PEP derived)	kynurenate			14674	22420	309171	389489	274866	54192	55840	51254	58248	43303	40315	96942	87231	94809	40455	60065	33018	68014	97075	69522	23929	25763	25417	18377
54	319	33950	LC/MS Neg	100001256	2597	206.082	2018-61-3	74839	C03519	HMDB00512		Amino acid	Aromatic amino acid metabolism (PEP derived)	N-acetylphenylalanine	70258	87925	61080	69275	241600	305627	247969	111047	90905	93971	95787	72978	67708	102081	91800	101444	134468	132592	134782	100652	154311	121105	77321	69780	62320	35969	38793	30657	30556	42190
56	323	33959	LC/MS Neg	100001254	2630	245.093	1218-34-4	700653	C03137	HMDB13713		Amino acid	Aromatic amino acid metabolism (PEP derived)	N-acetyltryptophan	48208	64779	55076	59187	279197	362992	294853	1171972	1130723	1099650				902828	963621	1058058	243438	277331	267404	841089	1056152	896834							17853	15748
63	360	64	LC/MS Pos Early	460	2878	166.086	63-91-2	6140	C00079	HMDB00159	PHE	Amino acid	Aromatic amino acid metabolism (PEP derived)	phenylalanine	219807264	229392416	216904192	208742240	683940096	680597696	684968192	292607840	291155072	281729440	247259296	248551312	267343616	491004096	493195648	509502240	321858496	313731392	322991776	309256320	316399936	310773536	249883984	227161008	218202752	219684016	367067968	406378720	386419264	364220672
66	379	18335	LC/MS Polar	100000442	2432.9	191.056	77-95-2	6508	C00296	HMDB03072	QUINATE	Amino acid	Aromatic amino acid metabolism (PEP derived)	quinate	2413502	2472766	3614686	3307155	2955537	4960039	3525052	2744755	2980738	1403349	3.75981e+06	2770906	3029889	4106992	2542360	3547469	1779313	2386733	1569920	2561086	2612233	2.5471e+06	990884	951929	2.06065e+06	792721	1015488	1007713	923373	1031771
68	392	15144	LC/MS Polar	100000293	2725	173.046	138-59-0	8742	C00493	HMDB03070	SHIKIMATE	Amino acid	Aromatic amino acid metabolism (PEP derived)	shikimate	2589057	2770785	2766657	2649048	8591924	8743967	7983035	2487655	2273732	2170929	4698190	5320914	4665761	4748434	4476587	3.98691e+06	2142114	2271762	2206194	3120806	3118183	3.37039e+06	5232337	4806023	4633501	4451631	1528026	1661674	1675556	1444295
69	420	54	LC/MS Pos Early	565	2986	205.097	73-22-3	6305	C00078	HMDB00929	TRP	Amino acid	Aromatic amino acid metabolism (PEP derived)	tryptophan	242396992	254836176	267017952	239804624	869392768	859449536	822847616	2366484480	2213995008	2137898496	20240288	24380408	21491494	2957531392	2951546112	2926939648	672950528	676610240	668832320	1729585536	1709157376	1780718976	32219832	28360152	27292250	26869176	120927296	132774112	123411296	99379032
71	423	1299	LC/MS Pos Early	815	2430	182.081	60-18-4	6057	C00082	HMDB00158	TYR	Amino acid	Aromatic amino acid metabolism (PEP derived)	tyrosine	53694392	58572052	46781360	54126224	194888720	220388688	218106320	77991720	73819896	67458880	86210912	79804688	83672352	91020336	88009544	99297880	97586800	89633232	93167816	76087776	75163168	68724112	69630496	73723712	73148256	72523848	95197264	97238056	86645312	88270232
82	350	45413	LC/MS Neg	100005384	990	260.023		514186				Amino acid	Aromatic amino acid metabolism (PEP derived)	O-sulfo-L-tyrosine	363074	384164	356835	472862	563945	745722	538900	472970	449634	404351	548266	555865	511131	357140	375890	354016	434975	519237	439430	447884	688381	471396	313647	284403	275843	281617	485225	498897	476773	483445
83	419	6104	LC/MS Pos Early	1095	3062	161.107	61-54-1	1150	C00398	HMDB00303	TRYPTAMINE	Amino acid	Aromatic amino acid metabolism (PEP derived)	tryptamine								794061	761921	907140				445582	480250	479708	160127	106805	193078	343424	297857	370800
85	422	1603	LC/MS Pos Early	1133	2540	138.091	60-19-5	5610	C00483	HMDB00306	TYRAMINE	Amino acid	Aromatic amino acid metabolism (PEP derived)	tyramine					689072	630183	710364	71812				80452				98522	82678		91267
91	328	48433	LC/MS Neg	100006056	2400	192.067	13200-85-6	759256				Amino acid	Aromatic amino acid metabolism (PEP derived)	N-formylphenylalanine	135193	134388	128288	155150	305935	400208	354117	237798	215547	211435	70917	101986	121658	202760	194089	198059	245124	292272	224591	184659	196972	173514	52464	58571	53458	42154	44552	16397		38340
112	80	6146	LC/MS Polar	381	3500	160.062	542-32-5;1118-90-7	469	C00956	HMDB00510	CPD-468	Amino acid	Aspartate family (OAA derived)	2-aminoadipate	10328706	11098805	9983309	10261115	15552570	16045576	17029358	10073594	9858203	8436892	12187361	12302602	13400986	28495922	28018102	29366018	10525117	10606265	10488528	19851900	20395984	21621454	3806096	3315453	3325099	3257259	4883431	5281457	4889407	4445002
113	95	38347	LC/MS Polar	92	2633.1	159.03	3184-35-8	71	C00322	HMDB00225	2K-ADIPATE	Amino acid	Aspartate family (OAA derived)	2-oxoadipate	51370584	58717904	54675424	63116904	36263000	36202528	37380188	68251656	65719760	59610456	24620652	22899166	24605020	115810584	113033440	116578792	46410172	52416060	51806736	145020272	150035456	134680480	3631482	3064287	3032724	2591209	1799207	1957754	1774690	1715426
114	138	1126	LC/MS Pos Early	811	1700	90.055	56-41-7	5950	C00041	HMDB00161	L-ALPHA-ALANINE	Amino acid	Aspartate family (OAA derived)	alanine	215611872	220092880	210292576	209989712	899041152	900065664	926627264	204735264	193542800	192464176	446350880	436723264	459457600	299474784	304998176	314874048	278871936	274133376	278333952	272049856	283712192	276874592	268768512	243972208	240091232	239622832	397527808	448723872	417637472	408586080
116	154	512	LC/MS Pos Early	917	1225	133.061	70-47-3	6267	C00152	HMDB00168	ASN	Amino acid	Aspartate family (OAA derived)	asparagine	513439584	553550400	536795712	514598880	11244100608	11419445248	11271715840	1648581760	1584578304	1554066176	6198349312	6278532096	6623978496	3940417792	3969026304	3998480896	1906041600	1852203904	1877584128	1805970176	1793943552	1814332544	929044992	827944576	815852928	822932224	303575296	324469120	303819104	285749184
117	155	443	LC/MS Pos Early	234	1165	134.045	56-84-8	5960	C00049	HMDB00191	L-ASPARTATE	Amino acid	Aspartate family (OAA derived)	aspartate	109308840	113163160	114466616	106247976	660486528	671302528	587043392	163005408	140702576	139053600	425680160	478677600	455813600	244057216	245553488	231987392	176997376	172932192	174385152	126646024	127011728	136042752	368007904	329924800	330177792	327182560	275963968	300453184	279055584	260258016
123	283	1301	LC/MS Pos Early	407	2850	147.113	56-87-1	5962	C00047	HMDB00182	LYS	Amino acid	Aspartate family (OAA derived)	lysine	95410504	97844072	93535032	93417056	279338880	278105728	288335296	135083344	128613224	126008424	126209312	122729672	133513864	134689392	131659312	139146736	147615424	145446128	144230896	128226304	130323248	126673848	189126896	160857312	159084448	158392656	161490464	177577712	169873696	156972944
124	292	1302	LC/MS Pos Early	415	2526	150.058	63-68-3	6137	C00073	HMDB00696	MET	Amino acid	Aspartate family (OAA derived)	methionine	75321616	80619976	71335752	73627496	306943008	305203424	337492032	83603456	82633072	81805560	111288760	104681200	121689848	199642496	199064288	228256944	86820520	85300288	87591872	158279280	156581776	146564944	133457064	119551864	116450776	116211584	148011952	169702672	152625472	146214688
125	294	18374	LC/MS Pos Early	100000039	1272	166.053	3226-65-1	158980	C02989	HMDB02005	L-Methionine-sulfoxides	Amino acid	Aspartate family (OAA derived)	methionine sulfoxide	20709252	21463472	24737840	20563224	88990400	91277144	84251880	31767574	26751262	26465612	32747738	39185464	32308220	61418656	61993404	57219204	30503582	30442448	30542266	49019896	53321852	58907400	14797571	14192703	13613269	12717905	11154170	12115707	11677656	8939183
127	302	36752	LC/MS Neg	100001734	1059	187.109	692-04-6	92832	C02727	HMDB00206		Amino acid	Aspartate family (OAA derived)	N6-acetyllysine	57610	66432	60356	60574	362099	396827	363042	130627	134206	117172	217634	172657	193014	108488	91253	123196	114730	103116	101970	120986	144462	127095	62362	70236	62062	66546	49915	47995	57457	68142
128	301	1498	LC/MS Pos Early	189	2825	189.16	23284-33-5	440120	C03793	HMDB01325		Amino acid	Aspartate family (OAA derived)	N6,N6,N6-trimethyllysine	58843880	64086004	59773620	56200792	92798152	89650992	90728384	63200672	58661020	56601904	47665952	48761528	52087848	64749248	62581716	66089460	77545384	76488824	78139048	87114768	90564416	89485904	32130612	27544368	26390432	25035512	26129242	30095148	27096220	23655064
130	307	1585	LC/MS Polar	1110	1564.8	130.051	97-69-8	88064	C02847	HMDB00766		Amino acid	Aspartate family (OAA derived)	N-acetylalanine	642838	709798	952988	641109	1990590	1.83691e+06	2054380	857000	795014	754026	826083	739281	1102402	700875	679974	859560	653234	882228	718401	947588	991414	807229	1973354	1370941	1243814	1135303	936251	838274	1422297	883173
131	309	33942	LC/MS Pos Early	100001257	785	175.071	4033-40-3	99715		HMDB06028		Amino acid	Aspartate family (OAA derived)	N-acetylasparagine					2840258	2581132	2339605			125379	1173262	1149751	1271445	465483	762593	589659	276099	342077	371449	310070		487291	446659	438988	449029	338909
132	310	22185	LC/MS Polar	100000787	3143	174.041	997-55-7;997-55-7	65065	C01042	HMDB00812		Amino acid	Aspartate family (OAA derived)	N-acetylaspartate (NAA)	2248329	2250110	2300921	2472968	5005282	4920536	4215323	3.05502e+06	2999246	2.61368e+06	4842649	4394951	4451043	4224700	4099360	4273921	1960768	2110001	2153895	2920705	2823135	3012693	1076250	892221	951380	970853	504088	458255	511018	523042
134	318	1589	LC/MS Neg	1083	1787	190.054	65-82-7	448580	C02712	HMDB11745		Amino acid	Aspartate family (OAA derived)	N-acetylmethionine	790115	857620	685496	1103555	1471307	1991405	1614283	746564	680763	735875	1170319	954106	815236	1178362	1.00328e+06	1095775	560300	652229	459732	546806	745047	586417	1218007	1211997	1216452	1153222	679092	715096	695179	765840
136	327	2829	LC/MS Neg	194	1543.8	176.039	4289-98-9	439750	C03145	HMDB01015		Amino acid	Aspartate family (OAA derived)	N-formylmethionine					49153	79558	65772		19762		15960	22762	15485	32236	27683	23391		23264		29102		31950
138	368	1444	LC/MS Pos Early	1025	2200	130.086	4043-87-2	849	C00408	HMDB00070		Amino acid	Aspartate family (OAA derived)	pipecolate	291415808	304280448	278237344	278787680	712119808	698514624	687438080	639111744	571035008	562079040	408917376	411596160	441702272	391059072	388647712	414187488	455798752	444430528	451771232	564454656	565458176	558985792	44841312	41063244	38724720	38656488	98844952	117838000	101305968	95242616
141	385	1495	LC/MS Pos Early	392	2530	277.139	997-68-2	160556	C00449	HMDB00279	SACCHAROPINE	Amino acid	Aspartate family (OAA derived)	saccharopine																							722977	585065	464104	494130	3338234	4059540	3366718	3100058
142	386	42382	LC/MS Neg	197	1832.4	383.114	979-92-0	439155	C00021	HMDB00939	ADENOSYL-HOMO-CYS	Amino acid	Aspartate family (OAA derived)	S-adenosylhomocysteine (SAH)	106517	107026	87838	103478	433859	579419	458787	98345	70786	76035	161765	147007	135606	161706	129134	137814	68184	87618	74009	116781	144606	97124	104199	106628	81192	70575	98670	95618	94727	86953
144	411	1284	LC/MS Pos Early	564	1514	120.066	72-19-5	6288	C00188	HMDB00167	THR	Amino acid	Aspartate family (OAA derived)	threonine	49620656	53732784	50461980	49605872	364956768	360490880	359265120	96087872	93009696	90339704	154637680	155450704	163078000	165739920	164745440	167990784	106940920	108837952	106366928	95342816	95830632	95854968	108905848	94405864	92021368	91077752	166291984	189304400	171999552	159424192
149	123	43231	LC/MS Neg	100004499	964.5	142.051	34622-39-4	3014237				Amino acid	Aspartate family (OAA derived)	6-oxopiperidine-2-carboxylate	137383	146176	162591	208050	243853	313164	293533	184388	177585	167924	179609	159346	159256	342331	282801	320983	156565	252669	165235	237324	253115	196714	52626				66881	45781		47539
160	393	38127	LC/MS Pos Early	100002183	2584	164.074	3493-12-07	458	C05319		CPD-397	Amino acid	Aspartate family (OAA derived)	S-methylmethionine	2474487	2679676	2409273	2231047	20029480	20022688	18070432	3476896	2556125	2626636	6114576	6610206	7380317	19100680	17930136	18870304	2763014	2463010	2606248	3757085	4257172	4066976	3439588	3016440	2882912	2789244	4.06476e+06	5287409	4281267	3.89543e+06
161	293	44878	LC/MS Pos Early	100004635	1250	182.048	820-10-0	69961				Amino acid	Aspartate family (OAA derived)	methionine sulfone	2666059	2759558	3170456	2768947	2596929	2754086	2966044	1615057	1370387	1364672	1624789	1404106	1546193	2844022	2900189	3031912	1877035	1818898	1888168	3144160	3556466	3382494	1079762	1053786	1052695	993077	1633472	1856348	1702532	1402477
168	100	54723	LC/MS Polar	100009325	4135	189.04	923-42-2	222467				Amino acid	Aspartate family (OAA derived)	3-carboxyadipate	537663	596441	839125	754624	885848	815697	751861	845309	666990	824389	277221	296923	428093	1939827	1.9844e+06	1837660	738381	812034	683460	1083779	1.63645e+06	1763055	614983	612749	520483	516435	262763	308227	322506	183429
171	255	15716	LC/MS Pos Early	100000263	2040	157.061	14403-45-3	440129	C05568	HMDB02320		Amino acid	Glutamate family (alpha-ketoglutarate derived)	imidazole lactate	30397940	32881918	31130372	29492380	5433769	5264654	4476924	45536492	31905604	33096928	5202262	5951647	5986312	36749976	38222544	34397580	163638096	151973376	161111072	22858802	24254258	25315212
173	32	32350	LC/MS Pos Early	100001208	2064	141.066	2625-49-2	75810	C05828	HMDB02820		Amino acid	Glutamate family (alpha-ketoglutarate derived)	1-methylimidazoleacetate	106126	244392	219356	189015	110306	135547	81538				85221		97948	597745	623614	576477	199631	199950	178060	198668	221707	195936					51246	99805	75696
176	111	15677	LC/MS Pos Early	100000042	2670	170.092	368-16-1	64969	C01152	HMDB00479		Amino acid	Glutamate family (alpha-ketoglutarate derived)	3-methylhistidine	59983552	67343736	65276984	54258920	68490168	69659256	59531032	54843296	42297860	41380212	47711652	59939532	53423524	218248608	217007984	227571344	54204080	48796396	53234624	70753680	72590560	84226752	16751848	16087691	15149397	14658422	33435804	43043148	37158280	23444090
177	113	1558	LC/MS Pos Early	1113	1350	146.081	3025-96-5	18189	C02946	HMDB03681		Amino acid	Glutamate family (alpha-ketoglutarate derived)	4-acetamidobutanoate	8000634	8783105	9486095	7956427	14082779	13290606	10161639	9632684	6917521	6728124	6383094	7159731	5921693	12393650	11686063	9925148	10803412	11001904	10977603	11391042	12077597	13321250	1844965	1850782	1602249	1219261	492438	421040	429174	305031
181	120	18319	LC/MS Pos Early	100000454	2220	118.086	660-88-8	138	C00431	HMDB03355		Amino acid	Glutamate family (alpha-ketoglutarate derived)	5-aminovalerate	7060998	4215714	4790118	4869116	20541448	23179024	20325720	3313343	5.59437e+06	3244038	6185706	7458381	4712730	3003184	4.13554e+06	4774778	11939161	12630947		3745328	3488817	5298989
182	151	1638	LC/MS Pos Early	231	2825	175.119	1119-34-2	232	C00062	HMDB00517	ARG	Amino acid	Glutamate family (alpha-ketoglutarate derived)	arginine	362506816	375100160	363243488	362076064	2622386944	2578663424	2597291520	733534208	705413568	682984448	1570592128	1540417152	1608582144	702329024	696902016	708436672	693160576	693909952	693464960	533447488	537656768	533965728	587499392	530603296	517805504	528839808	701745984	774197888	730376576	679724224
183	152	15497	LC/MS Pos Early	232	2745	291.13	156637-58-0	16950;828	C03406	HMDB00052	L-ARGININO-SUCCINATE	Amino acid	Glutamate family (alpha-ketoglutarate derived)	argininosuccinate	18590748	19962404	17828624	15849522	181718624	172383360	175711360	40898564	36972720	33702868	64377748	68656776	70152616	30300206	30356050	31461328	33020790	30849140	31002754	23865732	24396290	27238748	6349577	5808474	5720705	5411364	3.71772e+06	4422108	3.95225e+06	3519751
184	165	40007	LC/MS Pos Early	100003260	2085	176.092	4386-03-02	2572		HMDB02201		Amino acid	Glutamate family (alpha-ketoglutarate derived)	carboxyethyl-GABA	4412493	4888154	4452579	4198348	3632234	3702743	3471362	3.88576e+06	2992428	3111737	3337463	3558537	3761401	7.51613e+06	7459680	7218878	4648641	4390596	4351274	3.86094e+06	4047850	4.14341e+06	983862	783340	715518	684790	388663	637702	567480	504076
185	172	2132	LC/MS Pos Early	391	1520	176.103	372-75-8	9750	C00327	HMDB00904	L-CITRULLINE	Amino acid	Glutamate family (alpha-ketoglutarate derived)	citrulline	45414824	47055796	41568124	45469152	327356224	322807488	334342240	90237728	93822456	99749320	267620928	260598992	282910720	242286160	250512432	268012560	123861888	124839696	124875752	61479136	64109836	58273904	36209300	32954612	32744168	32704898	18128090	21210838	18742484	19984312
187	187	36808	LC/MS Pos Early	100001810	2850	203.15	102783-24-4	123831	C03626	HMDB01539		Amino acid	Glutamate family (alpha-ketoglutarate derived)	dimethylarginine (SDMA + ADMA)	17636756	18824644	17574088	16678860	28747414	28664680	27638176	22131974	21213610	20999488	16276490	16607285	17529134	20061544	18793314	18816066	20766308	18941826	19617264	24896676	24771874	25486074	66646212	58220716	57843304	55841992	64604064	73472144	67818664	61227368
189	205	1416	LC/MS Pos Early	141	2048	104.071	56-12-2	119	C00334	HMDB00112	4-AMINO-BUTYRATE	Amino acid	Glutamate family (alpha-ketoglutarate derived)	gamma-aminobutyrate (GABA)	1162977792	1227023104	1161388288	1180200576	2336984320	2325453056	2371078400	1233749120	1176655488	1175777792	1523019904	1519659904	1583279616	1688966272	1745130624	1744547456	1309950336	1298688256	1319654656	1474883456	1536798848	1468099584	787080960	726792896	712954496	713682496	586961664	665891712	601945280	580994880
190	227	57	LC/MS Pos Early	561	1500	148.06	56-86-0	611	C00025	HMDB00148	GLT	Amino acid	Glutamate family (alpha-ketoglutarate derived)	glutamate	2159093248	2215225600	2123430144	2073672576	6865086464	6690899456	6644861440	1959975552	1896295936	1850910208	2439235840	2441956096	2533483520	4424400384	4309233664	4418414080	1792694144	1782248576	1791140096	2885688064	2941744128	2944170496	597752064	552356992	526665184	528615360	725327104	799908160	752335936	691076992
191	228	33487	LC/MS Pos Early	100001103	2170	162.076	1499-55-4	68662				Amino acid	Glutamate family (alpha-ketoglutarate derived)	glutamate, gamma-methyl ester	5073458	5005189	4924544	4411707	5697732	6251394	6244056	3890139	4249247	3658688	3340262	3137150	3064508	3777645	3.79099e+06	3190144	5390936	3076053	3340386	3818228	3980363	4315655	2644975	3.78703e+06	2542524	1823349	1313695	1804106	1286892	1449874
192	229	53	LC/MS Pos Early	563	1291	147.076	56-85-9	5961	C00064	HMDB00641	GLN	Amino acid	Glutamate family (alpha-ketoglutarate derived)	glutamine	36869792	40326672	37052148	37512272	742077888	750078144	774182592	46983352	44833120	42571484	89659912	89767712	94264040	79469344	77867352	83312744	36090792	35986592	35874840	57816100	57718092	56481844	920969152	816509440	794051136	794550464	545513984	610815872	549876672	509405280
193	252	1574	LC/MS Pos Early	354	3035	112.087	51-45-6	774	C00388	HMDB00870		Amino acid	Glutamate family (alpha-ketoglutarate derived)	histamine	152990	332885	182251	257191	438916	278495	330994	267789	238892	224898	260085	283534	243395	433022	326928	321246	430323	487336	562115	237266	239834	282947
194	253	59	LC/MS Neg	355	755.9	154.062	5934-29-2	6274	C00135	HMDB00177	HIS	Amino acid	Glutamate family (alpha-ketoglutarate derived)	histidine	524119488	532685920	538360704	545454912	966847232	1009188224	1020558336	600115200	575757632	576803136	720016576	725473216	720336832	858471744	846269696	853968512	509135616	522052640	527332480	656896832	654273216	657972928	13732591	13956925	12942958	12634667	26356156	26887328	25907484	23839862
196	254	22138	LC/MS Pos Early	100000963	1908	190.119	1190-49-4	65072	C02427	HMDB00679		Amino acid	Glutamate family (alpha-ketoglutarate derived)	homocitrulline	822813	905291	1.04427e+06	799451	2546515	2369336	1827433	1102750	664384	696980	2681063	3881823	3260358	2743936	2591951	2547499	608946	526964	564487	1440871	1558029	1.9002e+06	929739	687643	573276	592748	515583	836564	654883	473061
197	308	33953	LC/MS Pos Early	100001266	2245	217.13	155-84-0	67427	C02562	HMDB04620		Amino acid	Glutamate family (alpha-ketoglutarate derived)	N-acetylarginine	1274324	1134637	1263868	1073776	2.48501e+06	2624838	2700012	1686611	1816926	1.60337e+06	1.45543e+06	1481544	1741664	1009448	965036	866452	855192	957383	1036927	1028687	1211510	827910
198	314	15720	LC/MS Polar	100000282	3106	188.056	5817-08-03	70914	C00624	HMDB01138	ACETYL-GLU	Amino acid	Glutamate family (alpha-ketoglutarate derived)	N-acetylglutamate	24151644	26485054	25567604	26348348	218272432	211666176	174772928	44355776	38487524	33431392	56344500	70119056	67083680	50588832	52874268	49507804	16635909	18049804	17366832	32206330	34095136	37613744	1075811	986681	930225	798796	401161	434349	420787	352994
199	315	33943	LC/MS Pos Early	100001253	845	189.087	2490-97-3	182230	C02716	HMDB06029		Amino acid	Glutamate family (alpha-ketoglutarate derived)	N-acetylglutamine					1085406	1262167	1221172	137075		140781	232306	243664	222492		135818	124295	107299						916946	737762	700626	781491	276881	352076	280267	259531
200	316	33946	LC/MS Pos Early	100001293	2065	198.087	39145-52-3	75619	C02997	HMDB32055		Amino acid	Glutamate family (alpha-ketoglutarate derived)	N-acetylhistidine	8768161	10064310	8050101	8887378	15338569	18056436	19556688	11747022	10517971	10286113	11128565	10713007	10548791	11026490	12219095	11410121	13133824	11280883	11898160	12147666	13369758	10902402
201	324	32984	LC/MS Pos Early	100000285	2000	175.108	6205-08-09	439232	C00437	HMDB03357	N-ALPHA-ACETYLORNITHINE	Amino acid	Glutamate family (alpha-ketoglutarate derived)	N-alpha-acetylornithine	2995198	3224280	2.78091e+06	2798772	4938207	5009357	5365243	6.68366e+06	6.064e+06	6151003	2785702	2492403	3018022	2675054	2621484	3158089	2097550	1876939	2130069	2211051	2322592	1982109	288938	344964	208522	244529	169063	269871	113442	302918
202	320	34387	LC/MS Pos Early	100001334	1695	158.081	1074-79-9	322640				Amino acid	Glutamate family (alpha-ketoglutarate derived)	N-acetylproline	15155792	16244935	14738194	15078222	19160208	18098580	18210720	7773738	7667759	7567304	10847290	10276163	11110176	12238730	11813782	12889411	5.67451e+06	5521697	5612163	11186575	12240907	11941923	5308377	4821476	4476799	4651053	4563732	5241920	4440677	4421469
203	347	1493	LC/MS Pos Early	444	2800	133.097	3184-13-2	6262	C00077	HMDB03374	L-ORNITHINE	Amino acid	Glutamate family (alpha-ketoglutarate derived)	ornithine	14464456	16340083	14678683	13945402	52551284	54904220	51437276	27533192	24376032	24782716	21328368	21571508	22612944	10429286	10529082	10274975	8598898	7.94272e+06	8469931	7514789	7387021	7568858	14936920	12456770	13150837	12579131	27759400	33327412	28225314	26050196
205	369	1898	LC/MS Pos Early	480	1603	116.071	147-85-3	145742	C00148	HMDB00162	PRO	Amino acid	Glutamate family (alpha-ketoglutarate derived)	proline	465174432	477938848	437265824	464060928	1390062464	1367719808	1387172864	1038443520	1035769216	1017171200	505838784	490609152	523132832	474422848	474414080	495988352	444092768	445546528	441717952	1438096128	1462049024	1442406272	493151680	422645440	410826656	407874304	537297728	589392896	562602240	561717504
206	377	46225	LC/MS Pos Early	100001540	1900	129.066	2353-44-8	134508				Amino acid	Glutamate family (alpha-ketoglutarate derived)	pyroglutamine*	7.78338e+06	8508789	6537435	7.9968e+06	9265124	9688935	12658402	4479063	5326123	5727105	13832185	9711128	13387765	19282566	19686894	28998932	7142404	6231836	7746270	9917383	9589066	7322295	537939	603302	488617	509997	358340	627871	493711	738990
208	399	34384	LC/MS Pos Early	100001296	1440	144.102	4136-37-2	115244	C10172	HMDB04827		Amino acid	Glutamate family (alpha-ketoglutarate derived)	stachydrine	11957086	12758946	11765678	12019461	11717566	11845203	11846447	19259006	18940844	18068720	17381480	17692804	18159844	97486528	96990136	95799984	69074584	66632764	68346408	31898412	33687240	32984652	774421	700402	661718	670057	1341963	1431924	1272249	1527071
210	414	32306	LC/MS Pos Early	1001	1064	132.066	51-35-4	5810	C01157	HMDB00725	Protein-hydroxyprolines	Amino acid	Glutamate family (alpha-ketoglutarate derived)	trans-4-hydroxyproline	9310561	9529796	9780486	9565222	15146039	13754439	17619038	11554553	11752715	11760622	15457419	15004772	14905698	4921472	5108891	5903283	8479281	8663946	8219708	13329559	14384866	17246848	8970378	7410039	7269332	7.16039e+06	4638375	4967578	4766356	2.79397e+06
211	337	37431	LC/MS Pos Early	100001956	1335	130.086	475-11-6	557				Amino acid	Glutamate family (alpha-ketoglutarate derived)	N-methylproline	6892202	8100159	5741070	7267045	12229786	13254060	16166914	8492398	9492040	9709887	7.84124e+06	6855605	7371951	16471848	15692624	19888008	5953720	6415076	5897603	13503953	14063858	10764021
213	415	607	LC/MS Pos Early	537	2285	139.05	104-98-3	736715	C00785	HMDB00301		Amino acid	Glutamate family (alpha-ketoglutarate derived)	trans-urocanate																							8658517	8425246	8724390	7530478	22103732	27972960	22935640	21588384
214	336	39577	LC/MS Pos Early	100003152	2109	118.086	1119-48-8	1550042;70703				Amino acid	Glutamate family (alpha-ketoglutarate derived)	N-methyl-GABA	775444672	820821568	778124224	768720192	727728960	735708928	721313792	1008651520	977380160	942549568	780958080	809703936	812869568	1833665280	1820010624	1952775168	939543424	924908352	947657024	1105213568	1106024576	1130804736	28400580	24594592	24501212	24163484	43098980	50834928	47549972	42879944
218	256	40730	LC/MS Pos Early	100003434	2263	141.066	1074-59-5	70630		HMDB02271		Amino acid	Glutamate family (alpha-ketoglutarate derived)	imidazole propionate				117578					149467	108421	100659			361572	377152	526087	69585		91507	289769	264151	162929	894698	785592	737297	701844	525747	767734	588113	500610
219	169	40410	LC/MS Pos Early	100003425	2406	139.05	7699-35-6	1549103				Amino acid	Glutamate family (alpha-ketoglutarate derived)	cis-urocanate																							10922423	10301186	11208032	10363155	17912056	22137118	18153464	15838731
220	31	30460	LC/MS Pos Early	100001051	2755	170.092	332-80-9	92105	C01152	HMDB00001		Amino acid	Glutamate family (alpha-ketoglutarate derived)	1-methylhistidine	16804020	17589020	26252066	17233784	24883158	23643628	13900021	26112078	14748234	15627882	7910744	14490791	9772308	41392352	43689424	26070292	17046546	16423422	16961904	22720870	24843210	36078680	2282441	2201320	2243300	2496772	7940613	8598398	7307613	8663040
224	326	43249	LC/MS Pos Early	100004523	1877	175.108		9920500				Amino acid	Glutamate family (alpha-ketoglutarate derived)	N-delta-acetylornithine	397666016	415650816	393512160	383028512	466706752	474850624	477965568	302553664	255514944	267491968	393868960	418522688	434698912	789573056	799755328	826446912	351186304	320267840	346097632	508137952	537663168	488868928	148855888	132178848	117842200	112249832	203968608	289568032	240902160	211710720
227	306	43255	LC/MS Pos Early	100004299	2100	212.103						Amino acid	Glutamate family (alpha-ketoglutarate derived)	N-acetyl-1-methylhistidine*	4434128	5044441	5120580	4448011	2612958	2554285	2366418	4335644	3282134	3.50563e+06	1074283	1223873	1255771	7816018	7711098	7348241	2854169	2995609	3.11448e+06	4.18368e+06	4221509	4816011	131349	117917	96951	178144	255765		249888
228	338	43586	LC/MS Pos Early	100004488	2845	189.135	53308-83-1	132862	C03884	HMDB29416		Amino acid	Glutamate family (alpha-ketoglutarate derived)	N-monomethylarginine	13270604	14087910	12595315	13220726	92514616	94007568	91445928	27070124	26688484	25783116	44415556	45016884	47714972	64318816	66046804	67337336	25148684	23236136	23554432	33309432	34433388	35299572	19092468	17042382	17000644	16482689	28137862	33379102	30900952	26514258
229	114	15681	LC/MS Pos Early	100000096	2320	146.092	463-003;463-00-3	500	C01035	HMDB03464		Amino acid	Glutamate family (alpha-ketoglutarate derived)	4-guanidinobutanoate	94898528	111157904	95312072	96220064	90485712	95863032	89367864	130874848	119590056	114297040	67803968	72461720	72892712	139917504	140392992	135827776	160511136	156102112	161599760	104613240	113971360	103888568	3603032	3.70611e+06	3129670	2780493	2196798	2954450	2362363	2142634
231	118	32349	LC/MS Pos Early	100001207	2055	127.05	645-65-8	96215	C02835	HMDB02024		Amino acid	Glutamate family (alpha-ketoglutarate derived)	4-imidazoleacetate	26472116	29212974	23758568	26050742	16195909	18518128	21021612	38398064	36826232	36446292	12223625	13052366	11924120	21265488	22349680	24682622	35140376	32892942	35807720	26158256	29252224	23618050	298687	414311	355464	435819	309561	273853	424805	356605
237	244	43802	LC/MS Pos Early	344	1937	118.061	352-97-6	763	C00581	HMDB00128		Amino acid	Glutamate family (alpha-ketoglutarate derived)	guanidinoacetate	1025975	1020008	992252	962242	799897	776519	778962	1402538	1410741	1352860	1054950	948159	1093780	10306163	10684776	10777912	1691041	1557503	1597541	2551672	2708254	2743567								158475
242	158	35101	LC/MS Pos Early	100001411	2145	132.077	353-09-3	67701	C03065	HMDB13222		Amino acid	Glutamate family (alpha-ketoglutarate derived)	beta-guanidinopropanoate	8.09646e+06	8704085	7367151	8019149	8670080	8651285	10624943	9971676	10223000	9998411	8196589	7248463	8677455	9616514	9309796	11564045	17052626	15955713	16469043	15743949	16008709	13856534					205518	169032	185986	104254
247	96	55072	LC/MS Pos Early	100002784	1760	174.087	3715-10-04	558	C05935,C03771	HMDB04225		Amino acid	Glutamate family (alpha-ketoglutarate derived)	2-oxoarginine*	47413128	46885144	54531784	41341288	26457616	27243598	22242168	89156416	57512000	60690240	8342073	10755731	11720385	46292264	48422732	37227736	83977896	76954672	87410240	36342080	43709380	52620376	5671476	4226414	3.78286e+06	3355223	746298	1433882	1107569	917041
249	268	1125	LC/MS Pos Early	376	2800	132.102	73-32-5	6306	C00407	HMDB00172	ILE	Amino acid	Branched Chain Amino Acids (OAA derived)	isoleucine	245755808	255416608	246735168	244573968	1497617664	1452980224	1511326720	573230336	543586240	516541152	325276544	308982272	333232192	746222592	735516544	768705600	1117563904	1104320768	1131079168	310929120	320299744	327937312	254438304	234995472	222049968	218401280	537777856	584724992	553162368	518683168
253	142	46552	LC/MS Pos Early	100005840	2775	132.102		6950182;99288				Amino acid	Branched Chain Amino Acids (OAA derived)	allo-isoleucine	91232752	107096928	86732272	85188288	90954808	103634560	100154104	56453692	67591312	73429848	33756712	43829160	47819148	195877488	203116352	206782256	80972232	90984352	79968376	80830984	86769304	73195848					12655783	12787922	13585926	16188075
263	79	38276	LC/MS Polar	100002417	1050	133.051	1756-18-9	677	C04039	HMDB12141	DIOH-ISOVALERATE	Amino acid	Branched Chain Amino Acids (pyruvate derived)	2,3-dihydroxyisovalerate	8364060	9622752	9402799	9428398	17258758	16534324	17420732	18613344	18226960	15848016	8554721	7480646	8495778	5159138	4764653	5407758	4536338	5082770	4950511	6612497	6.58941e+06	5699439	1975946	1.86531e+06	1.63712e+06	1524889	551413	517053	524769	520365
266	84	36746	LC/MS Neg	100001541	1800	131.071	488-15-3	164623		HMDB00317		Amino acid	Branched Chain Amino Acids (pyruvate derived)	2-hydroxy-3-methylvalerate				67106	92294	107770	122078							80920	49001	94135	56990	114711	55160	47185	74045	49293
269	108	44526	LC/MS Polar	100000936	911	115.04	3715-29-5	49	C00141	HMDB00019	2-KETO-ISOVALERATE	Amino acid	Branched Chain Amino Acids (pyruvate derived)	3-methyl-2-oxobutyrate	4271565	4422780	4726327	4643415	32690308	31140176	34474508	9859008	9203044	9191697	7.47065e+06	6474865	7521678	6514742	6940659	6711477	4107526	4639785	4654253	5239551	4953639	5528252	664772	544332	525723	415466	580485	684910	602896	684389
270	109	15676	LC/MS Neg	100000036	2064.2	129.056	1460-34-0;51829-07-3	47	C00671	HMDB03736	2-KETO-3-METHYL-VALERATE	Amino acid	Branched Chain Amino Acids (pyruvate derived)	3-methyl-2-oxovalerate	5414586	5394465	5656102	6238653	47237528	61548984	49050284	10444308	9326458	9904492	5202483	5354135	4474044	18845632	16596367	15975510	18005544	24284538	16948114	7.6411e+06	9704443	7262132	2237634	1.96796e+06	1582536	1499980	1697281	1.7286e+06	1649362	1467411
271	119	22116	LC/MS Neg	100000551	2170	129.056	816-66-0	70	C00233	HMDB00695	2K-4CH3-PENTANOATE&redirect=T	Amino acid	Branched Chain Amino Acids (pyruvate derived)	4-methyl-2-oxopentanoate	4124829	3786369	4030264	4494347	16316651	21131792	20083244	4265445	3254371	3266987	3239185	2897353	2753942	10958032	9794432	9585863	4320052	5348309	4510410	6506058	7736639	6350281	3201334	2371212	2053984	2465663	1360105	1425555	1478727	1356516
275	144	46537	LC/MS Polar	100001300	1052	117.056	600-37-3	99823		HMDB00407		Amino acid	Branched Chain Amino Acids (pyruvate derived)	alpha-hydroxyisovalerate	203500	420269	317267	384072	552863	673277	424648	441726	373785	277227	288101	234125	160545	189174	223394	244550	281099	381922	396052	481458	477712	387785	149391	180058	222045	250119	141462	108777	111591	193750
276	159	12129	LC/MS Polar	1442	1149.8	117.056	625-08-1	69362		HMDB00754		Amino acid	Branched Chain Amino Acids (pyruvate derived)	beta-hydroxyisovalerate	1257789	1469989	1408761	1472897	1566649	1880066	1710270	830114	1074766	835996	786279	814187	986486	729183	808135	913350	994492	1047262	864271	1491203	1468057	1148075	576151	461112	513089	558216	446859	335792	458000	452350
277	272	60	LC/MS Pos Early	397	2864	132.102	61-90-5	6106	C00123	HMDB00687	LEU	Amino acid	Branched Chain Amino Acids (pyruvate derived)	leucine	160121936	164104480	158400608	155782656	634164800	631116032	632438080	210103568	204624576	197849888	182625920	181379984	186076656	348350144	340826976	355599968	272187360	276048384	282266784	219201232	228686224	235269840	222499120	196979392	189076880	187466736	343182912	394137184	358116096	329751424
280	296	15745	LC/MS Polar	2051	2800	131.035	498-21-5	10349		HMDB01844	CPD-2461	Amino acid	Branched Chain Amino Acids (pyruvate derived)	methylsuccinate	15242609	16568535	18057496	15831482	123572144	133071760	104866160	18592904	14035007	11796899	22828678	25359914	24022940	29003072	27745902	25790992	15594802	15550639	15821460	17126968	17372158	20059160	5240453	4960348	5091234	4627259	5372004	4867730	5538841	5159181
282	317	1587	LC/MS Neg	1082	2400	172.098	1188-21-2	70912	C02710	HMDB11756		Amino acid	Branched Chain Amino Acids (pyruvate derived)	N-acetylleucine					140119	164352	136021	51792	44187	42675				32182	42721	46115	66694	113244	76982	61515		53811
286	434	1649	LC/MS Pos Early	566	2479	118.086	72-18-4	6287	C00183	HMDB00883	VAL	Amino acid	Branched Chain Amino Acids (pyruvate derived)	valine	85526608	89320704	88157960	85194280	986166080	958360704	1016672896	249721536	247832096	246505136	221546608	223965600	243330864	219867888	211680128	232094400	231933648	238324304	235166016	136136592	137324768	129543680	109755432	92161296	85501720	87069096	151256208	207105248	162393648	153337072
287	91	15667	LC/MS Polar	100000409	2605	175.061	3237-44-3	77	C02504	HMDB00402	3-CARBOXY-3-HYDROXY-ISOCAPROATE	Amino acid	Branched Chain Amino Acids (pyruvate derived)	2-isopropylmalate	203813632	216161440	214351856	205135696	613969792	623210368	571436160	252818352	221307184	188899680	228376736	255832368	244959776	486690208	454949024	455162688	184657264	190229072	187900016	149388512	158681712	156465904	1168630	723874	563650	604860	680851	858007	697664	567224
297	110	38667	LC/MS Polar	100002458	2579.6	143.035	5746-90-7	1551553		HMDB00522		Amino acid	Branched Chain Amino Acids (pyruvate derived)	3-methylglutaconate	531114	504251	1578159	678607	2927190	1630724	3232547	1900014	1727488	1444569	803575	1568419	712668	2194735	2572249	2679790				954192	932692	647720
305	121	1419	LC/MS Pos Early	212	2752	298.097	2457-80-9	439176	C00170	HMDB01173	5-METHYLTHIOADENOSINE	Amino acid	Amines and polyamines	5-methylthioadenosine (MTA)	3484164	3696751	3849992	4081072	6675331	6.85354e+06	5780907	2646389	2359921	2470849	4031471	4655791	4384132	2486873	2292729	2354027	1878390	1888055	1.73826e+06	2653783	2670873	3062706	419779	417419	430444	423715	428317	468161	403837	327928
306	137	15496	LC/MS Pos Early	100000103	3057	131.129	2482-00-0	199	C00179	HMDB01432	AGMATHINE	Amino acid	Amines and polyamines	agmatine	13173461	14630618	14446428	14288610	75486368	74951480	74027408	45186128	44313632	43582064	16166785	17050170	17609238	9396343	9220845	8868509	16329867	16487271	16318359	15663928	16011869	16464669						100512	94000
307	372	1408	LC/MS Pos Early	49	3027	89.1073	110-60-1	1045	C00134	HMDB01414	PUTRESCINE	Amino acid	Amines and polyamines	putrescine	172843	310574	483171	424053	4284201	4578288	4264746	637984	434591	569262	1961388	1.8703e+06	1486656	751320	667334	768453		437526	602169	881639	886962	692324					129603	137947		105157
308	397	485	LC/MS Pos Early	50	3355	146.165	124-20-9	1102	C00315	HMDB01257	SPERMIDINE	Amino acid	Amines and polyamines	spermidine	48175696	91697976	90088824	91039296	78310392	73507696	71975280	48599064	39833360	37762204	142718608	164771712	153100896	29132282	23879292	22330664	49439176	47473384	55247840	70972616	66248760	76600848	1269658	849050	969412	958700	2815501	3.18007e+06	2428295	1611353
313	321	37496	LC/MS Pos Early	192	2230	131.118	18233-70-0	122356	C02714	HMDB02064		Amino acid	Amines and polyamines	N-acetylputrescine	88378	139343	84248	93814	837880	704575	722323	160654	153230	140728	319099	333989	264113	206606	191281	242122	177333	124845		299513	137889	326491
314	329	43026	LC/MS Pos Early	100004035	1800	304.15	34441-14-0	9882882	C05324			Amino acid	Amines and polyamines	nicotianamine	148439792	136337360	266512960	151201584	328033856	346382528	213936240	420024128	227161344	220236016	138995680	286473184	171450464	430426848	424561952	262598784	174946528	158251440	159708912	224094976	267935952	432906848	112917592	103531168	90446128	90236936	93108048	121500192	104606096	45140900
316	298	32356	LC/MS Pos Early	100001214	3095	188.176	66039-56-3	128317				Amino acid	Amines and polyamines	N(4)-acetylspermidine	191059	227086	214034	215996	690924	678940	756295	185051	176252	135342	205673	270407	291306			45590	245681	186840	171566	282256	326960	282228
319	122	1494	LC/MS Neg	1021	738.5	128.035	98-79-3	7405	C01879	HMDB00267	5-OXOPROLINE	Amino acid	Glutathione metabolism	5-oxoproline	7278639	7.7212e+06	7141966	7805150	9945143	9771930	9558090	7271726	7357338	6916345	3061248	2994529	2960654	26154554	24076324	24969988	2686257	3077576	3155372	16589094	16831280	16697331	5672784	5325169	5447774	5346807	10715473	11493530	11000961	9941170
331	207	36738	LC/MS Pos Early	331	1775	277.103	1116-22-9	92865	C05282	HMDB11737		Amino acid	Glutathione metabolism	gamma-glutamylglutamate	6561322	6891203	7500776	6.09354e+06	16303480	16182060	13701773	5463471	3598135	4.15814e+06	5852637	7189923	6605370	7131110	7564517	6647262	4288151	3880299	4238733	6.36913e+06	7188206	8962749	1894034	1426901	1320077	1442556	1799378	2401551	2169155	1.81504e+06
332	208	2730	LC/MS Pos Early	1140	1430	276.119	10148-81-9	150914	C05283	HMDB11738		Amino acid	Glutathione metabolism	gamma-glutamylglutamine	417559	494786	476876	525342	9154957	9878889	9736780	352405	296438	365323	1090904	1011266	1016579	477234	510969	588472	389074	335677	279138	470535	587579	440116	10782806	10198919	9823021	9901813	7378985	7409950	7165805	7568109
334	209	18245	LC/MS Pos Early	1235	2740	285.119	37460-15-4	7017195				Amino acid	Glutathione metabolism	gamma-glutamylhistidine	30540876	33635432	31188918	29240650	47617008	45027156	44262372	25231328	22320146	22824348	26737740	29612488	28576988	36466224	36257884	35763928	26712552	24903274	26050588	27252426	28454762	29767216	199914	194107	192759	187285	1050692	1339977	1150775	1075354
335	210	34457	LC/MS Neg	100001485	1635	259.13		14253342		HMDB11170		Amino acid	Glutathione metabolism	gamma-glutamylisoleucine*	26928	29386	27149	39821	213948	286506	262678	53034	39872	45765	27594		16471	81138	88433	77725	105499	179387	123653	25330	28885	21704					199419	211011	199376	189624
336	211	18369	LC/MS Neg	1268	1685	259.13	2566-39-4	151023		HMDB11171		Amino acid	Glutathione metabolism	gamma-glutamylleucine	32447	46532	41279	53174	259138	356681	301727	39567	47758	27019	53807	43159	36755	71092	64922	59580	72958	75503	68219	49107	47574	45648	55153	60680	44708	35421	166753	196432	171550	155344
338	212	44872	LC/MS Neg	100001313	1268	277.086	17663-87-5	7009567		HMDB29155		Amino acid	Glutathione metabolism	gamma-glutamylmethionine	25988	33362	30441	33013	219965	294906	222323	26963	20754		38966	44472	40362	71929	56277	44559	29304	38764	38615	68897	96277	71708	64253	68035	65091	61748	130728	136590	134292	134938
339	213	33422	LC/MS Neg	100000491	1825	293.114	7432-24-8	111299		HMDB00594		Amino acid	Glutathione metabolism	gamma-glutamylphenylalanine	23013	34660	24667	36388	161964	185649	206175	33693	34849	21021	29749	24619	28363	544448	400229	437263	47691	49604	50817	36383	42308	25279	63842	51489	56879	49964	18090614	18034974	17431100	17644096
341	214	33947	LC/MS Neg	100001295	1960	332.125	66471-20-3	3989307		HMDB29160		Amino acid	Glutathione metabolism	gamma-glutamyltryptophan	472816	473090	411693	495224	2022383	2494229	2165253	7167247	6774875	6315900				9299676	8468548	8849787	1557877	1711042	1614756	5299927	6118524	5449995					481135	562916	527326	512421
342	215	2734	LC/MS Neg	1102	1240	309.109	7432-23-7	94340		HMDB11741		Amino acid	Glutathione metabolism	gamma-glutamyltyrosine					79766	86930	94620							403815	388107	354245							42829	35542	34801	36522	9902899	9973145	9605275	9706194
343	216	43829	LC/MS Polar	100001126	2916	245.114	2746-34-1	7015683		HMDB11172		Amino acid	Glutathione metabolism	gamma-glutamylvaline					392163	378623	398974	37185	44745			44435	30073	39584													33504	71644	66994	68288
346	206	55015	LC/MS Pos Early	100010901	2784	276.155		65254				Amino acid	Glutathione metabolism	gamma-glutamyl-alpha-lysine	202744	302906	179271	189270	811945	764070	822610	348986	194820	191317	279633	278302	284307	230700	219764	292464	399042	277516	368359	325172	287280	250420	391582	441951	366905	264039	337104	356890	370671	336927
355	224	48152	LC/MS Polar	572	2342	225.062	50-99-7	79025	C00031	HMDB00122	CPD-3607	Carbohydrate	Glycolysis	glucose	97601648	104376024	115362896	113503992	377147712	371926176	342485504	125902968	117988536	114074160	123787432	107470912	120545488	109486808	117840928	116225400	124498760	130710200	135581568	108304992	107452088	106315712	34253940	32450114	33691132	28178380	102952992	101575672	104765520	84618896
357	225	31260	LC/MS Polar	291	4537	259.022	103192-55-8	5958	C00668	HMDB01401	ALPHA-GLC-6-P	Carbohydrate	Glycolysis	glucose 6-phosphate	2740353	2488075	2090670	2173916	2213310	2114771	1910892	2949013	2483253	2041885	2125739	1875657	2685801	3039436	2648094	3358201	4561684	4413283	3999494	5020991	4563123	4594508	1696812	1179205	1318008	1087053	689283	740902	732698	351223
358	226	15443	LC/MS Polar	100000257	3233.3	193.035	207300-70-7	444791	C00191	HMDB00127	GLUCURONATE	Carbohydrate	Glycolysis	glucuronate	6805509	7615488	7477928	7541212	13923220	7220444	14501706	10611184	11028257	9111875	8590535	9143969	8818975	6850462	7.44193e+06	7181736	9674937	11822241	10586842	10647966	11380135	11699091	80609096	71661976	74712536	68395408	91263784	92460568	90690040	82898336
359	265	46896	LC/MS Neg	100002180	551	338.989					FRUCTOSE-16-DIPHOSPHATE	Carbohydrate	Glycolysis	Isobar: fructose 1,6-diphosphate, glucose 1,6-diphosphate, myo-inositol 1,4 or 1,3-diphosphate	413531	383634	526043	582805		301697	660487	152770	743777	607875	1838768	1330594	1599057	940378	760813	1006758	386136	524583	525551	233953	192813	153282
360	271	527	LC/MS Polar	482	1468.8	89.0244	79-33-4	612	C00186	HMDB00190	L-LACTATE	Carbohydrate	Glycolysis	lactate	5165706	7553499	5917339	7.90228e+06	5748887	4715255	6545052	20934820	8567942	6207350	4541815	4719825	4406282	7185328	5873384	5871703	7487246	11683155	10078285	9234499	9093528	9714770	7.8049e+06	11071293	7149024	6781819	11247816	12626982	12227932	9677499
361	363	597	LC/MS Pos Early	463	585	168.99	10526-80-4	1005	C00074	HMDB00263	PHOSPHO-ENOL-PYRUVATE	Carbohydrate	Glycolysis	phosphoenolpyruvate (PEP)					452538	468030	504859						93592	270104	329085	406252	146240	232410	158143	782157	788161	800072
363	378	48990	LC/MS Polar	823	1083	87.0088	127-17-3	1060	C00022	HMDB00243	PYRUVATE	Carbohydrate	Glycolysis	pyruvate	8.16514e+06	9369838	10854642	11418258	20863736	21554362	23483124	13608942	13359911	10257596	10586408	9532561	10368991	12018752	11940985	12586022	9681307	12748248	12742702	16975092	16382884	17352636	7142822	6106400	5048848	5067042	2552783	2467722	2414554	1808863
369	128	46173	LC/MS Neg	100001359	580	173.009			C00417	HMDB00072		Carbohydrate	TCA cycle	aconitate [cis or trans]	188308496	205879248	203162320	205283680	196456800	207146192	202102176	183502368	166817600	168424928	132445688	128670568	121677824	243634016	230156944	209409504	279626528	282654400	291576736	287670336	300817440	277266048	42087936	38158952	36307712	33286760	29726908	29242880	30760848	28766002
370	145	528	LC/MS Polar	93	2700	145.014	305-72-6;328-50-7;22202-68-2	51	C00026	HMDB00208	2-ketoglutarate	Carbohydrate	TCA cycle	alpha-ketoglutarate	840310528	848791872	910500224	814381248	999941056	971572864	934158592	998476224	843909824	829747968	485235424	479369760	495109472	1105807360	1131255424	1060951744	642206336	679606848	672266112	1102564736	1149376128	1150671488	195161840	169279872	161754544	156439968	35006416	34200256	34383128	25259284
372	171	1564	LC/MS Neg	1124	582	191.02	77-92-9	311	C00158	HMDB00094	CIT	Carbohydrate	TCA cycle	citrate	2435651584	2559592192	2522665984	2557285888	2817337856	2815980288	2768835840	3263348224	3104492800	2989008384	2259574784	2223864320	2281480448	2864576512	2836610560	2845833984	3590870784	3504556288	3684779008	3425739264	3485894656	3449528064	539590976	484387424	521351520	498169536	448241888	474318240	452859712	450532896
373	199	1643	LC/MS Polar	330	3084	115.004	100-17-8	444972	C00122	HMDB00134	FUM	Carbohydrate	TCA cycle	fumarate	171119104	189650880	182476256	185529424	387030560	382443488	336572224	162573344	129587648	127605496	159897888	151418048	159582832	128684288	125274728	123941608	112059704	116141984	116473176	160169536	151348240	157518224	46198684	36799292	32713556	30812900	34015108	34620320	33287518	27248304
374	266	12110	LC/MS Pos Early	1206	773	210.061	20226-99-7	1198	C00311	HMDB00193	threo-ds-iso-citrate	Carbohydrate	TCA cycle	isocitrate	152550368	159505776	141107920	155414240	113144256	108029272	116038808	156829760	154954448	153509344	108777560	96935000	119724160	153087056	139997104	154657552	196439520	195170512	191581536	170807952	169756288	170110720	23371056	19721316	18315552	20083192	22508240	26804598	22570430	22192992
375	285	1303	LC/MS Neg	409	615.6	133.014	6915-15-7	525	C00149	HMDB00156	MAL	Carbohydrate	TCA cycle	malate	4559711744	4832217088	4655157760	4799245312	5414313472	5406213120	5305273856	5048815616	4800747008	4748313088	3768959488	3738575104	3787408384	2800870912	2744340736	2901885184	4103194112	4026867968	4307829760	4316585984	4351302656	4266933504	441805920	395270496	401455840	373135104	412602944	431462112	400346144	385188000
376	286	20676	LC/MS Polar	100000707	2510	115.004	110-16-7	444266	C01384	HMDB00176	MALEATE	Carbohydrate	TCA cycle	maleate	9910094	10352097	11115626	8.1519e+06	5692054	6.05769e+06	5868893	7450494	7.08682e+06	7093047	4476571	5158685	5731293	4696993	5465050	5795850	8562565	14491348	7951748	7473648	11977000	11405198	1273008	1221681	940500	896209	1082270	1212669	1190623	1142574
380	405	1437	LC/MS Polar	252	3149	117.019	110-15-6	1110	C00042	HMDB00254	SUC	Carbohydrate	TCA cycle	succinate	390192000	424977120	469686816	444053376	824832128	861172352	795751104	550562944	521735552	473852032	372131616	353389152	337025408	540770944	482248352	472075360	319590048	381371936	361701344	469917152	474316224	491160320	346658240	298424160	293550336	282056672	195804368	196474880	194977856	174212448
383	92	52282	LC/MS Neg	100008929	575	205.035						Carbohydrate	TCA cycle	2-methylcitrate/homocitrate	3184211	3420876	3.94256e+06	3.93072e+06	4265211	4687345	4.04223e+06	2821192	2527843	2584564	2848866	3152633	3293058	5314710	4678835	5528672	4882528	4424841	4368896	4820417	4634400	4366903	3825990	3376001	3612643	3383473	2858033	3043466	2877526	2714435
384	267	54724	LC/MS Polar	100009239	2970	173.009	4702-32-3	98259				Carbohydrate	TCA cycle	isocitric lactone	1204345600	1282143360	1295622784	1307148416	1179589248	1225845248	1116779264	2096659072	1949454592	1784862848	1538423680	1560395008	1541860352	568422720	573355456	580089984	1047988160	1088694016	1042985408	1086392704	1122125184	1154422144	329527	325468	316445	237048	390901	377592	409203	384618
385	112	1414	LC/MS Pos Early	132	590	187	80731-10-8	724	C00597	HMDB00807	G3P	Carbohydrate	Calvin cycle and pentose phosphate	3-phosphoglycerate	560816	617111	399655	617148	1583871	1462567	1593588	577669	715576	640548	1175002	897504	1114722	1270109	1411398	1681701	1682207	1633466	1680257	3080045	3676955	3390895					291077	339203	183796	297888
392	390	53237	LC/MS Polar	100002619	2255	209.067	3019-74-7	5459879		HMDB03219		Carbohydrate	Calvin cycle and pentose phosphate	sedoheptulose	11098929	13233466	16571495	15541136	12377890	11481234	9939328	13552770	8378348	10942570	17362936	16209430	15573546	5533269	10602212	10044664	7852185	7913655	8543021	14029287	12970296	13431528	7563509	7622885	6929973	6097249	1556033	2554568	2466282	2.59378e+06
394	351	20694	LC/MS Neg	100000841	603	88.988	144-62-7	971	C00209	HMDB02329	OXALATE	Carbohydrate	Photorespiration	oxalate (ethanedioate)	21038312	21751372	20683134	22070968	17449850	16449443	17235196	13848089	12964097	14334128	21637364	20555112	21060646	17250758	16247500	14948504	15880557	14955858	15682007	16440255	16736443	16543966	9418639	7869579	8399783	8025141	5021361	5278660	4721520	4654946
398	231	1572	LC/MS Polar	1052	2070.4	105.019	600-19-1	752	C00258	HMDB00139	GLYCERATE	Carbohydrate	Photorespiration	glycerate	173634384	193147920	184950448	191141136	327031552	343047712	345764928	200450048	193994944	169994048	199064656	200289904	187463456	140011568	121009512	136265408	195595248	217062096	202178176	244877488	270841984	237568960	61203276	34585036	34928736	54836628	102870184	97632624	54647540	82211856
404	148	575	LC/MS Polar	828	1804.5	195.051	28697-53-2	66308	C00216	HMDB00646	D-ARABINOSE	Carbohydrate	Amino sugar and nucleotide sugar	arabinose	823133	602611	1080537	892436	1840590	1922478	1667526	610625	507659	1018886	1010857	805314	920307	841729	717085	1198724	942701	353528	1063359	940643	1227024	489872	1285311	1420705	1183048	1140702	5343752	5054723	4647520	4265636
407	192	20699	LC/MS Polar	100000846	1491	167.056	149-32-6	222285	C00503	HMDB02994	2-C-METHYL-D-ERYTHRITOL-4-PHOSPHATE	Carbohydrate	Amino sugar and nucleotide sugar	erythritol	113935	97329		161851	249965	298982	86611	121587	124367	74436	167227	122494	126998				98330	169548	178459		149141	43238
408	193	42420	LC/MS Polar	100001320	2186	135.03	88759-55-1	2781043		HMDB00613		Carbohydrate	Amino sugar and nucleotide sugar	erythronate*	64255700	74905392	80744280	69202152	136721872	140905456	131906616	80387848	88619088	71090368	64137112	66023744	66795984	60895700	61558952	78422752	40398928	43967056	42527016	71927384	46970100	84934528	11886038	10035077	10167623	9356697	11776742	12666383	12518289	10919919
411	223	27681	LC/MS Pos Early	100001009	1091	196.082	3646-68-2	73563	C03752			Carbohydrate	Amino sugar and nucleotide sugar	glucosaminate																							3585695	3460154	3.42129e+06	3445175	2762712	2867195	2827143	1811226
418	311	15741	LC/MS Polar	1212	4052	300.049	31281-59-1	440364	C04256	HMDB01367	N-ACETYL-D-GLUCOSAMINE-1-P	Carbohydrate	Amino sugar and nucleotide sugar	N-acetyl-glucosamine 1-phosphate	309955	358923	340913	361406	260861	270968	261563	524141	512274	474870	258368	295232	289522	214166	210500	198070	500084	543285	536207	455469	447199	470298	1342955	1060122	1082504	968952	629040	671626	617536	572334
419	312	15107	LC/MS Polar	1213	4114	300.049	102029-88-9	439219	C00357	HMDB02817	N-ACETYL-D-GLUCOSAMINE-6-P	Carbohydrate	Amino sugar and nucleotide sugar	N-acetylglucosamine 6-phosphate	128091	109065	94770	108035	598958	610618	611340	227212	234376	181485	152913	131673	140165		73438	101106	322489	310195	320099	358295	332782	379225	1544337	1338382	1302145	1199373	482075	545866	497960	492502
423	382	27731	LC/MS Polar	100001007	2425	165.04	5336-08-03	5460677	C01685	HMDB00867		Carbohydrate	Amino sugar and nucleotide sugar	ribonate	19117332	19212260	26601240	19457150	39593792	14662243	14556316	41580012	21867578	23987012	25626220	27482476	27257118	27413880	26129336	14433519	14481372	17651792	15730877	31719092	35095032	33622020	13927254	12141540	12576530	11073895	8374763	8624733	7711253	7180745
424	383	1471	LC/MS Polar	914	1508.2	195.051	50-69-1	5779	C00121	HMDB00283	RIBOSE	Carbohydrate	Amino sugar and nucleotide sugar	ribose	1925943	2290980	2679206	2444623	6704639	6099133	5706752	2190552	2097477	2178852	1942093	1343891	1.79867e+06	914093	949110	894053	1367602	1667178	1680787	2046737	1761143	1677975	6637250	5650143	4841350	4849360	5.12046e+06	4815643	4904936	4549335
428	426	32344	LC/MS Polar	1096	3950	565.048	117756-22-6	8629	C00029	HMDB00286	UDP-GLUCOSE	Carbohydrate	Amino sugar and nucleotide sugar	UDP-glucose	150584	157093	158313	152879				102035	104874	70725				1406183	1343008	1503107	676252	679988	613449	3065128	3077472	3123859					135830	152730	127074	137966
430	428	35162	LC/MS Polar	1249	3708.7	606.074	91183-98-1	445675	C00043	HMDB00290	UDP-N-ACETYL-D-GLUCOSAMINE	Carbohydrate	Amino sugar and nucleotide sugar	UDP-N-acetylglucosamine	273158	313792	236862	312389	457890	407906	427819	427601	352605	403824	330436	259319	249523	354496	258358	325216	448689	513388	494589	459167	492625	471668	1.77541e+06	1.47212e+06	1.5568e+06	1.32523e+06	585585	667256	633611	662193
433	440	15581	LC/MS Polar	826	1727	195.051	609-06-3	135191	C00181	HMDB00098	XYLOSE	Carbohydrate	Amino sugar and nucleotide sugar	xylose	150798	266611	279307		638708	1009259	642435	363861	349061	426334	319452		415181											200534	176832		171389	213668		281717
437	425	15860	LC/MS Polar	100000298	4000	565.048	2956-16-3;91183-98-1;137868-52-1	18068	C00052	HMDB00302	UDP-GALACTOSE	Carbohydrate	Amino sugar and nucleotide sugar	UDP-galactose														470558	402150	543015	163235	141723		878844	972319	1.00707e+06					24549			28087
440	150	48255	LC/MS Polar	100006115	2664.6	165.04						Carbohydrate	Amino sugar and nucleotide sugar	arabonate/xylonate	45168956	49020864	49987512	45680184	42019000	43636656	35733636	72574464	69115584	57000264	41668848	46246068	44189520	46130556	47216024	42740984	46414000	53600660	47677500	34365444	32947358	35518640	13011872	10824287	11120687	10134779	17406152	18784548	15662463	15786168
442	427	18396	LC/MS Polar	1257	3730	606.074	108320-87-2	439185	C00203	HMDB00304		Carbohydrate	Amino sugar and nucleotide sugar	UDP-N-acetylgalactosamine	167394	168327	196205	146425	149676	157411	193615	247875	214161	172611	117527	162189	141256	127778	168793	140267	242890	224257	233499	231559	219602	273132	722396	549953	482066	549582	284964	266014	262224	210589
443	149	48885	LC/MS Polar	100006430	1932.4	151.061						Carbohydrate	Amino sugar and nucleotide sugar	arabitol/xylitol	2455699	2260576	2563113	2670342	2352725	2692802	2807837	1992889	2156829	1968494	1835483	1930398	1864623	2194141	2098420	2192832	2265878	2389041	2373055	2703161	2876710	2984457	873882	765550	796195	676794	717553	820691	623642	583554
445	313	46539	LC/MS Pos Early	100006435	715	222.097						Carbohydrate	Amino sugar and nucleotide sugar	N-acetylglucosamine/N-acetylgalactosamine	7140303	8052287	7430077	7838380	16404351	16357813	15219967	9708021	10067238	9117437	6732471	6667286	6602499	4915946	5553082	5157934	7667902	7525005	8165819	9168969	9063303	9773125	14412135	12853169	12213804	12239820	8303912	8928900	8254763	7460118
446	384	54671	LC/MS Polar	100006122	1400	195.051						Carbohydrate	Amino sugar and nucleotide sugar	ribulose/xylulose	554176	633541	804565	759675	1232030	893433	1143128	931829	813920	772908	575036	395448	508028	326934	329098	315868	601749	711292	728322	793184	708926	681148		48521		38043	68412		72813	72558
455	166	37112	LC/MS Polar	100001859	3191.2	225.062	643-12-9		C19891	HMDB34220	CPD-8052	Carbohydrate	Inositol metabolism	chiro-inositol	324843040	332538272	325097728	333153696	140820048	141047648	131774000	214072608	231272112	203945472	124410128	118146768	129684256	168097472	166944880	168971712	212689168	239111952	229019200	337778208	342487648	312816128	77361056	73835840	74292256	74588176	34905464	36840772	33563412	33488960
456	261	43849	LC/MS Polar	370	4785	259.022	573-35-3;106032-59-1	440194	C04006	HMDB00213	1-L-MYO-INOSITOL-1-P	Carbohydrate	Inositol metabolism	inositol 1-phosphate (I1P)	1899557	1408525	1132817	1.76528e+06	1900785	1794744	3.45206e+06	1205271	1.76967e+06	2083979	1549149	859308	1671411	2170846	1.88215e+06	3684742	1949895	2157942	1460916	1342954	1504424	884193	1.57489e+06	1415248	1386073	959842	879330	978203	884929	940948
459	297	1124	LC/MS Polar	363	3506.3	225.062	87-89-8	892	C00137	HMDB00211	MYO-INOSITOL	Carbohydrate	Inositol metabolism	myo-inositol	899095808	975332480	927542592	970534912	1896509184	1903775232	1821073152	872525952	877677440	802768832	928312768	897979072	926098112	577921344	573155392	571122496	510434368	543114688	525914048	599493504	616621696	598304000	243639680	223667840	223471712	196987744	135793728	144549584	133541192	125312536
461	263	38388	LC/MS Neg	100002880	522	578.888		439468	C01284	HMDB03529	CPD-534	Carbohydrate	Inositol metabolism	inositol pentakisphosphate	142022	238395	219908	354206							728747	386115	579458
462	262	39575	LC/MS Neg	421	527	658.854	83-86-3	890	C01204	HMDB03502	MI-HEXAKISPHOSPHATE	Carbohydrate	Inositol metabolism	inositol hexakisphosphate	6630735	9776993	7.83825e+06	13194382					117311	132409	20637252	10871965	16789560	688418	628616	249175	84720	210374	159653	91825	114177	85206
464	367	37086	LC/MS Polar	100001860	2039.6	239.077	10284-63-6	164619	C03844	HMDB34219	CPD-8046	Carbohydrate	Inositol metabolism	pinitol	2236259840	2551617280	2595310848	2332523520	1036346496	1138347904	1022785664	2324100096	2076984448	1882730624	1459710592	1409579264	1482268544	954566272	916104768	1001012416	2735105536	2917494272	2860403712	2866600704	3020002560	3049268480	126008824	112762768	116252424	108136928	119152600	104943920	115053976	92558656
468	264	38389	LC/MS Neg	100002881	541	418.955		439455	C01243	HMDB01143	INOSITOL-1-3-4-TRIPHOSPHATE	Carbohydrate	Inositol metabolism	inositol triphosphate	75840	94864	78554	166857							378852	161392	241315
473	19	22012	LC/MS Polar	100000980	3970	549.167	470-69-9	440080	C03661	HMDB11729	1-KESTOTRIOSE	Carbohydrate	Sucrose, glucose,fructose metabolism	1-kestose	4644894	5.0227e+06	4748816	4.83796e+06	4857567	4.82925e+06	4819635	4159075	3924138	3.603e+06	2480114	2544303	2520513	9151075	8189804	8860346	3837078	4066666	3811176	5587309	6.07027e+06	6033129
474	101	43805	LC/MS Polar	100000095	2706.7	237.062	103404-70-2	4636210			KDO	Carbohydrate	Sucrose, glucose,fructose metabolism	3-deoxyoctulosonate	13849663	14727054	15189888	15626498	23395804	23288668	22812040	17945000	17997338	15316641				17692076	16879676	17398928	16341093	20800372	17657470	22411326	23706170	23791136	13543644	11178381	11763263	10322466	9830280	11088710	10042595	9397362
478	194	37427	LC/MS Polar	100001986	1133	165.04	533-50-6	5460032	C02045	HMDB06293		Carbohydrate	Sucrose, glucose,fructose metabolism	erythrulose	2241174	2967144	3279787	3375814	5487659	4893834	5148179	1822959	2052307	2921568	2635647	1832834	1724354	1918585	1805228	1638278	1611476	2581636	2161542	2525788	2220300	1588790	422469	374048	325324	465475	54957	154484	103801
479	198	48195	LC/MS Polar	878	2022.2	225.062	57-48-7	5984	C00095	HMDB00660	Fructose	Carbohydrate	Sucrose, glucose,fructose metabolism	fructose	66785848	70580920	74002792	70990704	318274304	319457280	289883424	99585112	92285544	83090120	91106856	81660536	92036008	77515264	77293584	82468504	79042416	84598432	82893512	41851640	42328568	41196240	18459660	18280416	17725040	16816216	56203600	54390072	57608852	47392552
481	201	34706	LC/MS Polar	100000908	4656	341.109	16908-86-4	439451	C01235	HMDB05826	CPD-458	Carbohydrate	Sucrose, glucose,fructose metabolism	galactinol	86707	157345		109295		82051	84887	444871	391534	377806		122890	88796	461922	544512	236585	375130	405688	349030	327357	411605	318464	1124835	961883	948538	863651	2912731	3341624	2916251	2700066
483	202	27719	LC/MS Polar	100001026	3085	195.051	299-28-5	128869	C00880	HMDB00565		Carbohydrate	Sucrose, glucose,fructose metabolism	galactonate	290839840	313481216	324457120	312023040	769506560	583041152	768587136	520516640	517565472	432789952	358936416	331752448	352781184	546718784	416544224	397939872	382534848	441216576	412178720	310550624	321527424	352344096	99280712	73858968	76017880	70391808	95524296	103034912	92850896	91704872
485	203	15706	LC/MS Polar	100000300	4552	259.022	19046-60-7	123912	C00446	HMDB00645	CPDQT-4	Carbohydrate	Sucrose, glucose,fructose metabolism	galactose 1-phosphate	1686379	1652582	1119786	1681333	2541283	1.76531e+06	1731728	1612357	1606318	1641565	1539644	1691061	1.85917e+06	2586794	2367825	2392660	1.82403e+06	2074248	1822649	2362972	2395141	2497645	260451	205622	188519	253599	507373	544364	644648	539252
489	221	20705	LC/MS Polar	100000852	2573	209.067	62475-58-5	71306729				Carbohydrate	Sucrose, glucose,fructose metabolism	glucoheptose	2252953	1503755	1122764	2505564	2.01114e+06	3661191	1684180	626549	735710	2476485	506218	529784	613016	2789054	823865	1167083	780878	2580083	2686369	1622754	3385055	938139	799780	858261	672999	592745	356870	443968	826442	390121
491	290	46142	LC/MS Polar	100001740	2260	181.072		5780	C01507	HMDB00247	SORBITOL	Carbohydrate	Sucrose, glucose,fructose metabolism	mannitol/sorbitol	27047232	28707186	24737176	27928890	22555640	22737044	25559548	26771510	29251292	26550108	13065425	12886744	13723516	32469666	29942300	32985028	31360722	34706352	33138910	35779240	38658168	35708364	17885204	16546865	17321062	14881310	10361339	11109046	9995803	9939164
497	288	15586	LC/MS Polar	913	3329.4	387.114	6363-53-7	10991489	C00208	HMDB00163	MALTOSE	Carbohydrate	Sucrose, glucose,fructose metabolism	maltose	414815456	437558336	400305792	452854720	241549136	247135040	281666272	308719552	344583232	323904768	265875808	244938464	266043440	381623936	382679872	406115648	386850432	413162176	385521664	356580192	381844416	356361408	5058222	4242708	3900996	3781484	13422668	13884955	13829074	15285406
500	289	44688	LC/MS Neg	100000276	812	503.162	1109-28-0	439586	C01835	HMDB01262	MALTOTRIOSE	Carbohydrate	Sucrose, glucose,fructose metabolism	maltotriose	6640979	5923921	6060532	7074974	5493854	5640524	4872651	3597016	3254231	3285884	3455737	3615037	3947417	6983951	6157063	5664235	5372033	6130204	4260576	3595180	3333674	3084771	578678	722697	525738	570985	1471930	1439558	1551385	1480279
504	291	48153	LC/MS Polar	803	2200	225.062	3458-28-4	18950	C00159	HMDB00169	L-mannose	Carbohydrate	Sucrose, glucose,fructose metabolism	mannose	3104795	3007031	3807094	4.00165e+06	7.08068e+06	6328753	3404066	3969498	3990042	3.76497e+06	3326142	1678011	3452705	2128947	4499107	4.01423e+06	3417302	3.55975e+06	3663698	3352811	3.89924e+06	3901891	579775	1249819	672658	812347	1967707	2099839	2208705	1488646
514	380	586	LC/MS Neg	879	978	503.162	17629-30-0	10542	C00492	HMDB03213	CPD-1099	Carbohydrate	Sucrose, glucose,fructose metabolism	raffinose	2032912	1041013		1499242	2642126	3145474	1400715	2786500	3.38954e+06	3343510	1986739	730261	1611912	25774528	25166800	25456468	7367806	8488858	6.41161e+06	4745209	5784552		16106716	16517675	13832108	13449556	36155408	38925440	37281060	34264772
520	400	15960	LC/MS Polar	934	5280	665.215	10094-58-3	439531	C01613	HMDB03553	CPD-170	Carbohydrate	Sucrose, glucose,fructose metabolism	stachyose														2775412	2724235	2822561	56377	58053	70299				379908	323088	322684	292819	12342896	12381165	12073243	11357038
521	406	1519	LC/MS Polar	935	3092	387.114	57-50-1	5988	C00089	HMDB00258	SUCROSE	Carbohydrate	Sucrose, glucose,fructose metabolism	sucrose	2042658432	2241893888	2191367424	2192990208	3932758784	3908837888	3753197312	2563106816	2517144320	2151855104	2075819008	2079025664	2064299520	4867117056	4927992320	4701095424	2009543680	2169513984	2013692800	3370559232	3556899072	3660516096	1170609024	1034741632	1076089088	1008801728	1451464576	1519822464	1435712384	1318091648
545	124	15442	LC/MS Neg	100000341	583.9	275.017	921-62-0;53411-70-4	91493	C00345	HMDB01316	CPD-2961	Carbohydrate	Sucrose, glucose,fructose metabolism	6-phosphogluconate	462138		404753						447415	228057	337889	354022	396828	1313256	1621329	2012963	1.64468e+06	1723629	1419482	2582823	2848238	3.22972e+06
546	222	587	LC/MS Polar	338	2922	195.051	527-07-1	10690	C00257	HMDB00625	GLUCONATE	Carbohydrate	Sucrose, glucose,fructose metabolism	gluconate	78644704	95251968	102891088	89374984	126866384	127495928	88863872	145535280	107106488	87092152	41334296	55274280	51849904	102411904	98912664	88507040	106784096	106993456	107508024	127524336	130372136	152099840	1279723	1.57378e+06	2645814	2521303	5070261	10607964	3389089	3.88192e+06
553	170	47076	LC/MS Polar	100006438	2600	129.019						Carbohydrate	C5 branched dibasic acid metabolism	citraconate/glutaconate	9826463	7374014	6123014	7822217	9959243	8938964	13490696	17465740	10992716	6667025	8674809	6831214	9829217	7430776	9577460	8784044	7433882	7935932	6270549	6932664	8416813	7500770	2368263	1826724	1.87829e+06	1.90065e+06	2195233	2480441	1980558	2163235
559	15	33971	LC/MS Neg	100001278	5555	267.233	29743-97-3	5312435		HMDB60038		Lipids	Free fatty acid	10-heptadecenoate (17:1n7)	1283356	1.54268e+06	486800	856970	4.15817e+06	2554810	3177670	678881	1040942	946369	1474566	923659	1719083	1380334	1.04675e+06	1741394	1.57006e+06	1319663	1056836	1376605	1926644	1260207	3337283	3309935	2851558	2342778	1372780	1678101	1.57361e+06	2102338
564	87	32413	LC/MS Neg	100001180	5364	243.197	2507-55-3	1563	C13790	HMDB02261		Lipids	Free fatty acid	2-hydroxymyristate																							18266704	15430222	15326534	12684280	15472717	17874732	14848725	13568506
565	89	35675	LC/MS Neg	100001579	5511.2	271.228	764-67-0	92836		HMDB31057		Lipids	Free fatty acid	2-hydroxypalmitate	2151097	2322880	1190167	1909397	4415768	3324135	2860564	2065624	2103428	1.55535e+06	1940786	2010558	2418364	2.43128e+06	2540427	2406132	2128870	2363362	2245638	2184028	3559697	2128570	246600512	224099008	194780768	148394144	87731904	101099264	90563288	89087656
566	90	17945	LC/MS Neg	1239	5695	299.259	629-22-1	69417	C03045			Lipids	Free fatty acid	2-hydroxystearate																							32028780	32264940	25164232	21366796	10896678	14306286	12440946	14415632
570	105	22001	LC/MS Neg	100000773	3446	159.103	88930-08-9	26613		HMDB01954		Lipids	Free fatty acid	3-hydroxyoctanoate	3639748	3683053	3363140	3905795	2936578	3713338	3385510	3.10321e+06	3573612	3.29767e+06	2461653	2339482	2116031	2542547	2373862	2199822	3690430	4203665	3476327	3141411	3.98462e+06	3498507	163643	159794	125886	122751	106201	102187	99533	95387
571	106	27503	LC/MS Neg	100000983	5476	271.228	928-17-6	301590		HMDB10734		Lipids	Free fatty acid	3-hydroxypalmitate	3055282	2373782	1556734	1777425	4324335	2808817	2896269	1886019	1886292	1705839	2166445	1805132	1793207	2904501	2644566	3158689	2250552	2370881	1843349	2481885	3337698	2729158
573	115	38309	LC/MS Neg	143	4745	155.108	75899-68-2;128946-65-6	1693		HMDB04362		Lipids	Free fatty acid	4-hydroxy-2-nonenal	6513549	6.91485e+06	6804191	9748485	3657621	5182489	4459666	7.12362e+06	7916221	7.70809e+06	7004118	5722911	4210408	6018962	5611520	5379798	8806435	13405490	8.22968e+06	6.03979e+06	9424588	7338096	532243	346374	373627	465381	603079	386138	444031	646673
577	125	21239	LC/MS Neg	100000956	2300.4	159.103	764-89-6	69820				Lipids	Free fatty acid	8-hydroxyoctanoate	1323165	1451241	1291487	1536350	3022878	3965515	2646049	1798817	1995084	1958785	1725816	1551087	1280647	2.07703e+06	1771097	2009498	1558435	2077684	1610155	2.03445e+06	2229535	2159778	929599	797811	657032	721463	502536	478456	501162	396546
584	164	32489	LC/MS Neg	926	2713.7	115.076	142-62-1	8892	C01585	HMDB00535		Lipids	Free fatty acid	caproate (6:0)	12785496	12079385	12252998	13029974	15320830	17000928	14568412	9620395	10852218	9119368	11010385	10466482	9067482	14862283	13017237	10262167	11328135	16421533	11565485	10231326	12009029	9964326
595	190	33587	LC/MS Neg	100001335	5950	309.28		5282768		HMDB02231	CPD-12189	Lipids	Free fatty acid	eicosenoate (20:1)	3220362	2057922	1067993	1382110	9183945	5610117	5717072	1247452	1709805	968163	1.75689e+06	1471005	1283291	4702146	3559697	4978062	2503606	3170815	1823353	2666937	4255617	3419887	1062700	1134047	724874	696137	674342	754005	602233	678912
596	191	1552	LC/MS Neg	1087	6355.6	337.311	112-86-7	5281116	C08316	HMDB02068		Lipids	Free fatty acid	erucate (22:1n9)	243769	161367	57063	119495	284619	245761	208674	101373	111924	100019	253408	185896	186854	165387	215531	264827	202438	297398	145273	160394	311395	186118	250066	293255	222809	228710	160606	240570	250050	232253
607	274	1105	LC/MS Neg	180	5535	279.233	60-33-3	5280450	C01595	HMDB00673	LINOLEIC_ACID	Lipids	Free fatty acid	linoleate (18:2n6)	10557343	10236995	4625721	7625234	18545050	11685159	17991194	5149198	6945856	9381308	7565056	7.77532e+06	12078238	10706639	10344185	13844910	11027226	8940741	6163771	7550578	13068162	9475413	5750543	6685629	4856275	3.99531e+06	2746480	3062565	2096064	4798142
608	275	34035	LC/MS Neg	100001337	5450	277.217		5280934	C06426	HMDB03073	CPD-8117	Lipids	Free fatty acid	linolenate [alpha or gamma; (18:3n3 or 6)]	1509504	1348188	780936	1220901	3145584	1.88012e+06	2386240	850085	1149589	876990	678534	935279	1034174	1450035	1205691	2057903	1086837	1267319	866474	968252	1345409	1116862	3949603	3611197	2968375	2321463	1047203	961410	940672	850627
619	352	1336	LC/MS Neg	424	5618	255.233	57-10-3	985	C00249	HMDB00220	PALMITATE	Lipids	Free fatty acid	palmitate (16:0)	688465024	665558464	310874880	356639872	1706747904	868675008	1041524992	546432704	621572416	427877312	487608416	475541280	598089664	833744064	744161536	924035136	792486592	617571072	558193280	691295296	829985152	798329984	329026208	342022048	363588288	313488832	256783424	288846272	303202592	309040000
635	143	37073	LC/MS Neg	100001723	1920	131.071	6064-63-7	99824		HMDB01624		Lipids	Free fatty acid	alpha-hydroxycaproate	419215	435133	408257	610275	666147	644564	668310	455616	327272	364178	587819	449321	391771	353777	317679	272926	399782	489091	428843	529620	491547	430540
646	85	52281	LC/MS Polar	100008928	1258	103.04						Lipids	Free fatty acid	2-hydroxybutyrate/2-hydroxyisobutyrate	796640	531420	485840	711516	1080139	997218	1014899	586527	625284	459270	580607	436046	389640	297298	430269	356175	268580	689465	482284	624484	576304	794041	242767		200408	178886	124719		338206
647	86	37253	LC/MS Polar	100002070	3352.8	147.03	40951-21-1	43	C02630	HMDB00606	CPD-381	Lipids	Free fatty acid	2-hydroxyglutarate	32893974	37392964	33312036	38558152	31635550	35254388	34012024	31632022	32938748	29093700	19594832	19858090	18820020	56550344	57679256	55269068	27832960	30427716	28313758	49782208	51114600	46873976	23192212	22918806	24572978	18475812	21895120	22961160	19219346	17458192
649	339	52285	LC/MS Neg	100008930	5655	281.249						Lipids	Free fatty acid	oleate/vaccenate (18:1)	338011872	293038368	94497024	105438488	1226612480	607722432	733947904	160289568	186671424	101845672	147065072	148157824	217792880	580423360	514181504	685855936	313625760	236497152	221383824	290194624	413500704	370940544	49298880	57592748	48169728	42642488	34593616	39495296	46605144	37379824
650	107	52938	LC/MS Neg	100008933	5674	299.259	45261-96-9	5282907				Lipids	Free fatty acid	3-hydroxystearate	2858052	1877219	1035619	1101126	3838768	2776291	2047416	1620592	1407252	1014731	1568321	1959358	2237694	3093692	2895733	3187032	2013117	1709229	2179255	1512122	3213011	2388998
653	103	542	LC/MS Polar	254	1443.3	103.04	625-72-9	441	C01089	HMDB00357	Hydroxy-Butyrates	Lipids	Free fatty acid	3-hydroxybutyrate (BHBA)	405353		238772	213154	291595	343289	561345		595360	357851			229725	582417	496480	478892	175166		307501	295446	206114
657	104	53230	LC/MS Neg	100006367	1725	131.071	10191-24-9	151492				Lipids	Free fatty acid	3-hydroxyhexanoate	286194	293446	287761	365511	224307	265177	229146	258902	272485	259964	242981	183902	176511	198156	210796	189339	283513	401207	337215	284450	366447	264768
660	88	54920	LC/MS Neg	100010866	5560	297.244	56472-29-8	9796304				Lipids	Free fatty acid	2-hydroxyoleic acid																							60426640	61544020	44852112	34732352	17373928	24481496	18077024	22541852
663	340	38102	LC/MS Neg	1137	6400	324.291	11-58-0;111-58-0	5283454		HMDB02088		Lipids	Fatty acid amide	oleoyl ethanolamide	205520	120774		85077	862059	599401	568529	61840	95959		180463	95890	83563	289735	238891	288532	118639	175331	75809	81166	298322	97100	512958	553860	361686	242349	167295	139155		146260
671	278	52608	LC/MS Neg	100006726	6150	322.275	68171-52-8	5283446		HMDB12252		Lipids	Fatty acid amide	linoleoyl ethanolamide	191566	106472			251732	106760	185312		123529		99261			158499		136825	168314	243999	121679	145747	203490	149475	222478	197029	120230	75318	115050	117562	76424	114602
672	17	37752	LC/MS Neg	100002196	5275	295.228		43013				Lipids	Oxylipins	13-HODE + 9-HODE	27685208	33207776	30160776	40312688	65455592	90494672	69946392	30249304	26856976	26911688	51879564	40506584	32304602	39913968	33655920	32122172	29382296	41416108	32257412	22694706	40966744	28886820	14362071	15381729	12200886	10409778	6221578	8137822	6927404	6145065
675	16	38395	LC/MS Neg	62	5137	313.238	263399-35-5	10236635	C14829	HMDB04705	CPD-13086	Lipids	Oxylipins	12,13-DiHOME	3886458	3469788	2812048	4368891	4636389	9577880	7315519	4.19189e+06	2927416	2941995	4294045	3650487	2530600	5169446	3244636	3150101	3.88267e+06	5446599	3620347	3458419	5977520	3559526	5410434	5021385	4109967	3711499	2780919	2698255	2857042	2260747
676	126	38399	LC/MS Neg	179	5180	313.238	263399-34-4	9966640	C14828	HMDB04704		Lipids	Oxylipins	9,10-DiHOME	1339929	1235875	424842	1706506	1987076	3054754	2070919	1157838	452234	1278440	1556139	1528759	832213	1800377		1396427	917407	2256435	1378233	1166776	2000730	1144582	1919730	1969864	1579358	1485012	1009026	1124999	1004715	843518
686	18	46109	LC/MS Pos Late	100002836	1313	277.216	74784-20-6					Lipids	Oxylipins	13-HOTrE	1889919	1670903	1986391	1712040	4449360	4191435	4232452	1955394	2261911	2002503	2380516	2423080	2283272	2.8338e+06	2717188	2.98175e+06	1865571	1998037	1.91299e+06	1932730	1928592	2.09067e+06	6136407	5280649	5.72362e+06	5116568	2946454	2740502	2540652	2234917
699	353	52944	LC/MS Pos Late	100009233	1482	342.337		151731				Lipids	Fatty acid ester	palmitoylcholine	389591	342372	410242	427862	584992	631913	577276	402952	482213	515580	458922	435675	425242	356914	361729	289325	415963	464888	392924	469717	515443	478232	135538	90286	96887	98343
700	341	53260	LC/MS Pos Late	100009331	1449	368.352						Lipids	Fatty acid ester	oleoylcholine	190680	165636	172197	187882	496770	507029	440091	112699	150872	170515	149237	193750	141271	240276	221016	119037	123421	160778	152307	141148	200038	158565
709	24	27447	LC/MS Neg	100001040	6477	279.233	2277-28-3	5283469				Lipids	Glycerolipids	1-linoleoylglycerol (18:2)	1525114	856157			3440915		607546		1683433			7260283	1028788	1513780	725814	4672638	609501		376226		3761324	931142	3472253	2794356	2196768	5714639	2421853	2.00616e+06	1646872	2784470
711	40	21184	LC/MS Neg	100000924	6500	281.249	111-03-5	5283468		HMDB11567		Lipids	Glycerolipids	1-oleoylglycerol (18:1)	7477524	5784373	4541071	4589873	42542508	27173054	26035712	3224238	3911969	1899522	6521964	6134243	7786512	4940830	4665278	5319843	4306565	4590807	3088966	3257739	5058577	3919696	3970865	4990086	2587512	2204028	1365278	3755046	2127957	2710896
718	94	21232	LC/MS Neg	100000943	6300	281.249	3443-84-3	5319879				Lipids	Glycerolipids	2-oleoylglycerol (18:1)	9058572	6603645	2889546	2.96578e+06	66118916	33032472	36195172	3657566	4990146	2584800	6401177	6808456	6975543	7.82771e+06	7059362	9014568	5382440	6578576	4013944	5133897	8269790	5976339	923289	1126897	645136	636805		514525		1074557
729	232	15122	LC/MS Neg	1254	758	91.0401	56-81-5	753	C00116	HMDB00131	GLYCEROL	Lipids	Glycerolipids	glycerol	1.51655e+06	1357743	1760902	1725709	2900546	3435932	3140474	1.58529e+06	1.48245e+06	1434705	1301732	1.43785e+06	1542549	1145438	1103382	948325	1593558	1349982	1455308	1618758	1.52195e+06	1.50854e+06	796399	1.00296e+06	915851	932337	465638	683221	483430	575279
730	44	45968	LC/MS Polar	100005716	825	509.288						Lipids	Glycerolipids	1-oleoyl-GPG (18:1)*	306787	275321	307887	271204	1068820	1306064	1061795	295013	248531	257324	283390	419456	296771	283831	234854	214352	205078	275138	278177	171132	163854	165429
735	345	46799	LC/MS Pos Late	100002990	3223	636.556	104346-53-4					Lipids	Glycerolipids	oleoyl-linoleoyl-glycerol (18:1/18:2) [2]	68058520	81398176	82858768	72123200	131166184	139478560	90997184	49590896	40170000	36927712	97745104	94503736	77937016	94734480	93452624	100126856	50338216	33012580	41578680	54719860	93293176	93663248	32989012	33956864	24700168	23184496	25729898	21677952	29708184	23055414
736	355	52633	LC/MS Pos Late	100009052	3080	610.541		9543695		HMDB05207,HMDB07103		Lipids	Glycerolipids	palmitoyl-linoleoyl-glycerol (16:0/18:2) [1]*	3283374	3770025	3287340	3302373	5019400	4908514	5064917	2146957	1940978	1.84002e+06	5321060	4683968	4755887	3408850	3339855	3.93642e+06	1.8913e+06	1367144	1776029	2655907	3542596	3059706	7744701	7759136	5825499	4977004	4944795	3542603	5985225	5143798
737	356	52634	LC/MS Pos Late	100009055	3197	610.541						Lipids	Glycerolipids	palmitoyl-linoleoyl-glycerol (16:0/18:2) [2]*	48240540	59580952	61827452	50612608	64620460	67788144	40199080	57577156	44820484	41306032	77169008	77824848	61161868	82389024	84406224	86846520	59881984	39246708	49975720	45880256	89215456	89456088	62580496	64409912	47930516	43246096	51927096	44843120	58672252	42942660
743	184	54966	LC/MS Pos Late	100010940	2733	608.525						Lipids	Glycerolipids	diacylglycerol (16:1/18:2 [2], 16:0/18:3 [1])*	521954	536972	496215	387673	980179	1146042	856649	495190	220608	373595	1032188	1237009	917250	691659	779599	873980	351656	283529	265808	696676	619940	316664	12157972	10810700	10920198	4648287	4419819	6301816	8428731	5022301
744	276	54951	LC/MS Pos Late	100010932	2229	630.509						Lipids	Glycerolipids	linolenoyl-linolenoyl-glycerol (18:3/18:3) [1]*																							1635876	1947816	1496000	1039711			844663	696851
745	277	54952	LC/MS Pos Late	100010933	2268	630.509						Lipids	Glycerolipids	linolenoyl-linolenoyl-glycerol (18:3/18:3) [2]*	4762929	4622409	4147096	5266895	4616595	4597112	5181117	2434229	2186142	2275505	8739737	7224378	8296724	5663219	5025674	7849994	2261262	2125441	1937923	3203192	3351929	2941779	19995280	19521640	15161940	11550015	10367913	10857632	14356656	12005660
746	279	54963	LC/MS Pos Late	100010926	2426	632.525						Lipids	Glycerolipids	linoleoyl-linolenoyl-glycerol (18:2/18:3) [1]*	2375850	2310741	2594813	2463748	2995627	2.93494e+06	2246189	1309901	1093937	1101998	2821094	3840288	2921160	2279241	2328721	2143266	901413	819435	853603	1.68411e+06	1693347	2085485	3.82311e+06	4014033	2934710	2641794	1845991	1736888	2502729	1916198
747	280	54964	LC/MS Pos Late	100010927	2478	632.525						Lipids	Glycerolipids	linoleoyl-linolenoyl-glycerol (18:2/18:3) [2]*	41296200	40336432	39964732	43740640	45453224	45843364	44828444	29233682	28099056	27029480	57865448	55940500	52951768	57549680	57026192	63996776	27096614	27869820	25922222	46337304	49843540	49046048	42661760	38520916	29576718	25676462	27695308	23597638	35767288	25170276
748	281	54968	LC/MS Pos Late	100010941	2689	634.541						Lipids	Glycerolipids	linoleoyl-linoleoyl-glycerol (18:2/18:2) [1]*	20674968	21666802	11560757	17076234	17598206	21163608	28144408	7546248	6910086	8808354	29954074	23327356	31349724	10706805	13394399	21949088	8392573	7805955	8.20253e+06	14307174	16254856	5125823
749	282	54969	LC/MS Pos Late	100010942	2760	634.541						Lipids	Glycerolipids	linoleoyl-linoleoyl-glycerol (18:2/18:2) [2]*	80213904	65334820	58206732	62962524	42229520	36897152	42835484	38484340	45638276	52524176	74662944	62935384	57500856	50043372	56563724	70772480	72180976	59916584	55210860	67284272	63887832	51135488
750	343	54970	LC/MS Pos Late	100010944	2819	634.541						Lipids	Glycerolipids	oleoyl-linolenoyl-glycerol (18:1/18:3) [2]*		9679543	8393486		17719690	18532294	17473892	5.39165e+06			10505359	11168123	10405184	10591992	11150247	15139822				8343181	8744243	7663755	16483881	16936504	15995821	9998307	11413330	9149578	12341377	9524292
752	346	54946	LC/MS Pos Late	100010919	3695	638.572						Lipids	Glycerolipids	oleoyl-oleoyl-glycerol (18:1/18:1) [2]*	17317592	19228184	16987908	15740479	56337300	56789852	51939756	16777708	16800836	13642897	19204250	16573381	15218645	22490512	26876008	28335968	13531920	10314949	9697562	16168435	19317554	23986970	7019141	6957414	4608007	4337611	6548275	6476003	9229780	8462126
755	354	54965	LC/MS Pos Late	100010939	2834	608.525						Lipids	Glycerolipids	palmitoyl-linolenoyl-glycerol (16:0/18:3) [2]*	4454478	5675470	5463130	2877160	10219445	10104386	9497644	4822587	2810901	4721040	7872292	8.31369e+06	7946184	8044629	8886600	11394022	3884832	3574041	3559847	7224303	7984705	7086655	92646944	93621984	82340864	61154124	58913696	54127868	65022556	56585604
756	358	54942	LC/MS Pos Late	100010917	3695	612.556						Lipids	Glycerolipids	palmitoyl-oleoyl-glycerol (16:0/18:1) [2]*	13254424	16054634	12282430	14333296	37518768	36420496	36130472	15713374	15784065	14035223	17364940	17681808	15867704	25018788	27480540	27660076	12653389	10101240	10524026	14608881	16973704	16059145	11269257	10797331	7401085	7318745	5145668	4.156e+06	6324158	5248818
757	402	54947	LC/MS Pos Late	100010921	3762	638.572						Lipids	Glycerolipids	stearoyl-linoleoyl-glycerol (18:0/18:2) [2]*	28675836	29939884	28301242	29274864	24932722	26289604	23526632	23019048	21685360	19280620	34979932	34291940	32287344	23868120	28955934	27601524	27996554	23229224	22737636	23877722	25891540	28547800	11580542	10810586	7540115	7303863	5892896	4384715	8032939	7402187
760	357	54943	LC/MS Pos Late	100010916	3562	612.556						Lipids	Glycerolipids	palmitoyl-oleoyl-glycerol (16:0/18:1) [1]*	528258	739047	865376	509469	2349415	2464606	846264	596346	524155	409966	765654	1074458	388837			851330	391602		280925		510849				859146	677899				143221
764	342	57349	LC/MS Pos Late	100010943	2740	634.541						Lipids	Glycerolipids	oleoyl-linolenoyl-glycerol (18:1/18:3) [1]*																							9205062	7748075	7040954	2549327	3048802	2610128	4765069	5600686
765	401	57326	LC/MS Pos Late	100015585	3317	636.556						Lipids	Glycerolipids	stearoyl-linolenoyl-glycerol (18:0/18:3) [2]*	2260856	2891526	3336041	2158387	4.10596e+06	4307426	1296130	2997314	2001842	2088148	4022389	4535846	2301056	3.63042e+06	3996985	3118007	2358452	1167347	1798561	1273910	3510688	3716620	26975680	28829908	19877576	17494572	11486190	9245620	14839122	8819816
768	26	34419	LC/MS Pos Late	100001395	1465	520.34		11988421	C04100	HMDB10386		Lipids	Phospholipids	1-linoleoyl-GPC (18:2)	2430904	2767297	2322116	2.03079e+06	1533721	1610525	1447499	2050266	1771217	1633195	1314111	2290602	1.34208e+06	3755558	3.50906e+06	4365746	2675981	2.92134e+06	3974506	2911783	2477012	2876959	511008	488801	362391
769	27	32635	LC/MS Neg	100001570	5900	476.278		52925130		HMDB11507		Lipids	Phospholipids	1-linoleoyl-GPE (18:2)*	122747				280936	219750	223316	103038	107817	62415				185240	271295	347679	142558	187817	93897	188158	311274	303541	635175	408968	271644	249743	90880	125361	179475
770	28	36594	LC/MS Neg	100001778	5494	595.289						Lipids	Phospholipids	1-linoleoyl-GPI (18:2)*	388442	208600	200294	213094	854937	623571	732275	455677	514895	543078	171151	216986	173012	617601	729414	716566	827627	741807	573100	649703	1281861	1111999
773	42	48258	LC/MS Neg	100001272	6250	596.357	19420-56-5	16081932		HMDB02815		Lipids	Phospholipids	1-oleoyl-GPC (18:1)	1843965	1209576	684133	764452	10174556	6260515	7.6492e+06	1051364	1561279	1019610	1391054	1382019	948541	2440823	2738693	3289976	1395482	1962777	1124499	1479051	2975931	2495766
774	43	35628	LC/MS Pos Late	100001569	1554	480.308	89576-29-4	9547071		HMDB11506		Lipids	Phospholipids	1-oleoyl-GPE (18:1)		566076	540625	594780	3884972	3682281	3.35621e+06	641021	531742		688737	748453	833217	605317	640861	730288	424451	514779	460998	478476	517813	553774	1.62219e+06	1.26073e+06	1.05577e+06	1.0123e+06	336299	391812	301676	280076
775	45	36602	LC/MS Neg	100001777	5599	597.305						Lipids	Phospholipids	1-oleoyl-GPI (18:1)*	1433020	1028701	1074884	1067919	6429471	4.03898e+06	5497852	738148	1001721	889169	1777273	1.61463e+06	1634395	1166798	1702950	1283304	828014	831767	443656	699210	1360298	1655807
777	63	34428	LC/MS Polar	100001445	1445	409.236	17618-08-5	6419701	C04036	HMDB00327		Lipids	Phospholipids	1-palmitoyl-GPA (16:0)	2318925	2452226	2126078	1972776	3360601	3261988	3650027	2005523	1948320	1.71382e+06	1.83253e+06	2042598	2043300	1178148	1032294	1074001	1274034	1411408	1327289	1.03632e+06	1156552	937601	202700	183093	143252	124398	107216	123984	99582	104943
778	64	33955	LC/MS Pos Late	100001263	1525	496.34	17364-16-8	86554		HMDB10382	2-Acylglycero-Phosphocholines	Lipids	Phospholipids	1-palmitoyl-GPC (16:0)	20081752	19733076	20190738	20431004	38287624	36466492	37023424	26768180	28102882	27856614	21338308	20322838	20787656	23913302	22382198	24369984	21421318	23040868	21125332	25776860	26733084	27262930	4505827	3940620	3.56816e+06	3028306	1129216	1121459	1048829	731984
779	65	35631	LC/MS Pos Late	100001567	1544	454.293		9547069		HMDB11503	2-Lysophosphatidylcholines	Lipids	Phospholipids	1-palmitoyl-GPE (16:0)	6457123	6053910	6190687	6346689	11333393	11233596	11508953	8704627	7778573	7874956	6.74806e+06	6456057	6852840	6432040	6373880	6.73859e+06	5836253	6524087	6166995	7374808	7.31955e+06	7681619	8631996	7023674	6697658	5808676	1.89803e+06	1.92488e+06	1.79753e+06	1512349
780	67	35305	LC/MS Neg	100001655	5564	571.289				HMDB61695		Lipids	Phospholipids	1-palmitoyl-GPI (16:0)*	4981890	3879680	3942584	4215713	16044622	9884538	11187434	4588335	4888800	4489557	5539597	5395179	4591832	4514440	5.4581e+06	4949369	4604229	5783617	2867412	4941249	8623071	8.27944e+06	132343	106798	81979				105473	64068
781	75	33961	LC/MS Pos Late	100001271	1606	524.371	19420-57-6	497299		HMDB10384		Lipids	Phospholipids	1-stearoyl-GPC (18:0)	5245312	5192984	5581007	6024233	8699491	8476866	8960258	5938500	5383595	6043448	5910899	5933627	5894995	4647751	4296544	4900627	4793776	5.54945e+06	4979877	5286433	5278926	5779924	1347187	1117785	1058802	1042386	405451	419311	349222	209752
782	76	42398	LC/MS Pos Late	100001461	1626	482.324	69747-55-3	9547068		HMDB11130		Lipids	Phospholipids	1-stearoyl-GPE (18:0)	547950	519213	467048	487592	758815	714477	785378	558947	566358	613549	523273	520968	570372	368236	329390	357824	476410	547598	483731	420890	521480	480921	590834	502852	503870	513084	150014	141057	124372
788	97	35253	LC/MS Neg	100001562	6215	570.341		15061532		HMDB61702		Lipids	Phospholipids	2-palmitoyl-GPC (16:0)*	231155	128412	51438	86819	521124	365060	376899	277514	202767	90359	151286	123960	74103	231879	247261	341046	211508	225912	79226	195565	382195	312594
792	233	43847	LC/MS Pos Early	100000258	580	173.021	29849-82-9	754	C00093	HMDB00126	GLYCEROL-3P	Lipids	Phospholipids	glycerol 3-phosphate	16101452	15587052	15391701	15706479	33615068	31756980	32377176	16756257	15983471	15213059	17851896	18721228	19629776	15851838	17002216	16541728	20855616	20496216	21672352	21465974	20957476	22237200	46184880	38873980	39938968	41097656	19440352	21776684	21260042	22259548
793	234	37455	LC/MS Pos Early	100001620	659	216.063	33049-08-0	123874	C01233	HMDB00114		Lipids	Phospholipids	glycerophosphoethanolamine	5381374	4884378	4448274	4793618	6214898	6.94456e+06	7046549	6462169	6265048	6596494	4948414	4132464	4048265	6284865	5830226	5933306	7729228	7.55782e+06	8.05882e+06	8438245	8323840	8546243
794	237	15990	LC/MS Pos Early	100000269	672	258.11	28319-77-9	71920	C00670	HMDB00086	SN-3-GLYCEROPHOSPHOCHOLINE	Lipids	Phospholipids	glycerophosphorylcholine (GPC)	96817216	102171072	95296088	98043512	117413992	117936472	121711216	148877056	147129504	145930656	90380536	85901040	90072024	161631872	159120416	169560304	147019664	148805616	152169328	181571664	184134336	180027856
801	364	1600	LC/MS Polar	1026	4559.1	140.012	1071-23-4	1015	C00346	HMDB00224	PHOSPHORYL-ETHANOLAMINE	Lipids	Phospholipids	phosphoethanolamine	187121	163358	106736	173234	416681	425026	565707	239144	260447	249377	413083	338520	343290	292767	290244	343398	533371	589234	553893	949822	1056047	901590	8412909	7170266	6959326	6411423	3075383	3224690	3204752	2842801
812	78	19324	LC/MS Neg	100000656	5794.3	599.32	796963-93-4			HMDB61696		Lipids	Phospholipids	1-stearoyl-GPI (18:0)	1139431	791174	734927	660299	1.81654e+06	1366624	1311333	557618	868853	734627	963104	1029180	674240	671153	849573	838884	965815	1232257	721805	842927	1566810	1481213
820	66	45970	LC/MS Neg	100005717	5570	483.273		3300276				Lipids	Phospholipids	1-palmitoyl-GPG (16:0)*	12674026	10959517	5733605	5924873	21969256	16339513	15708264	8061292	10226148	6649879	7184531	7522691	13104736	16983472	18742832	22446380	14690271	12926695	8467127	8449290	14505160	11979461	319112	255090	210202	154799	76041	114501	114121	85940
835	41	36812	LC/MS Pos Late	100001671	1635	437.266	325465-93-8	5497152				Lipids	Phospholipids	1-oleoyl-GPA (18:1)	1.93054e+06	1.7496e+06	1693761	2152127	6392615	6.566e+06	4148969	1148113	1370041	1444007	1958242	2.05875e+06	1255814	690175	563439	984921	1217703	1.4616e+06	1209275	883508	944348	969603
836	74	36810	LC/MS Neg	100001670	5829	437.267	325465-92-7;799268-65-8	89567				Lipids	Phospholipids	1-stearoyl-GPA (18:0)	624411	288401	205880	162317	497939	491657	499513	91483	282174	202930	367065	314685	225931		268544	159935	238857	311790	177860	134908	178408	153237
837	236	52307	LC/MS Neg	100001621	630	333.059	16824-65-0					Lipids	Phospholipids	glycerophosphoinositol*	33253906	33610896	34185680	33367420	20611644	19532136	19555608	37513912	42653000	37981000	23751112	22346388	26045908	48449840	50991440	50489944	58146072	56696172	56048972	48631892	49076664	52584228	197510	144946	169255	215653	240614	269797	228716	279862
850	54	42446	LC/MS Pos Late	1537	2160	758.569	40811-94-7	5287971				Lipids	Phospholipids	1-palmitoyl-2-linoleoyl-GPC (16:0/18:2)	209879408	191466240	210010752	216733872	220258880	221010368	234197568	255702288	212664784	251051424	254045520	260601408	256726784	406440992	331923392	488425248	268309568	281648928	278455296	450338304	447801856	493319488	38506952	24963964	29566852	29558482	26944528	25895252	24490374	20341384
851	55	42449	LC/MS Pos Late	100001870	2275	716.522		9546747		HMDB05322		Lipids	Phospholipids	1-palmitoyl-2-linoleoyl-GPE (16:0/18:2)	97927136	94010064	94676968	99529120	108763248	106731384	114020248	103790480	93641640	104526808	119400200	117781680	125224584	187538448	156548160	222236080	113293752	129008264	124638792	209527104	222373472	218639760	24038474	17462756	19403932	20633166	15075995	13275307	15411644	14912544
852	57	52450	LC/MS Pos Late	1528	2730	852.56						Lipids	Phospholipids	1-palmitoyl-2-linoleoyl-GPI (16:0/18:2)	148766704	150199248	140860864	149272528	172846800	174970752	180935552	152870736	159280848	165790384	165624128	164598672	163270496	179640976	167070208	205702064	191037504	195934416	193400240	227479760	221574688	213541392	12731533	9413417	10323901	8757889	17948068	15990333	15897121	12539511
853	39	52451	LC/MS Pos Late	100008979	2700	878.575						Lipids	Phospholipids	1-oleoyl-2-linoleoyl-GPI (18:1/18:2)*	21789856	20258380	20051632	21450492	29790832	29416570	32065644	12802554	14318151	14411065	21589664	20965316	20709278	24717650	22357716	28383852	14555812	15265059	14838360	25777088	26054092	24842992	1.88734e+06	1501101	1410971	901066	2.96887e+06	2.54191e+06	2674874	2326196
855	60	19263	LC/MS Pos Late	1526	2509	718.538	26662-94-2	5283496		HMDB05320		Lipids	Phospholipids	1-palmitoyl-2-oleoyl-GPE (16:0/18:1)	63515532	60291316	57276544	61551824	125500824	125435608	130553120	65704332	56487528	62331740	75993368	72588280	75813264	109585008	98425504	127357056	50973580	59818876	55779548	94865600	98433336	102565640	8535707	6535843	6861125	6952845	4432825	3641073	3861097	3799780
856	59	52461	LC/MS Pos Late	1539	2358	760.585	26853-31-6;26853-31-6	6436017				Lipids	Phospholipids	1-palmitoyl-2-oleoyl-GPC (16:0/18:1)	122817456	114873568	114209600	132858096	248519760	223573808	279525760	141566624	129812968	154508000	143695168	133523896	140004432	179485984	150584416	224937952	130261344	150079488	145792752	205268416	211827936	210262816	19200788	12845299	14287758	14777293	9249775	9072785	8739128	7611562
857	14	52625	LC/MS Pos Late	100000652	3157	740.544		11846227				Lipids	Phospholipids	1,2-dipalmitoyl-GPG (16:0/16:0)	39397248	39918432	37997968	40364104	60284948	57328904	59355520	42762712	40699544	41219268	47763764	46667160	46507272	49194380	43883964	52426092	33163512	35624328	35054716	47189548	49414780	50340552	4081462	3269657	3489520	3215907	2688379	2280728	2209406	2056725
858	56	52628	LC/MS Pos Late	1543	2730	764.544						Lipids	Phospholipids	1-palmitoyl-2-linoleoyl-GPG (16:0/18:2)	25840544	25581598	24754332	26128802	41560172	41451108	44621376	25633828	23170580	25258028	32345716	31523270	34493192	40333472	36322000	46622136	26875250	29924564	27522024	41221804	42936848	39414732	1598455	1287364	1257978	1193965	1.93767e+06	1615784	1572357	1025492
861	7	52603	LC/MS Pos Late	100008903	2006	782.569	998-06-1	5288075				Lipids	Phospholipids	1,2-dilinoleoyl-GPC (18:2/18:2)	235804832	225726496	239587072	247007680	265792432	283199040	300536608	223168992	167157920	198217696	262554928	266568960	290157312	453107776	369715776	578978432	224843088	254021584	252931920	457328256	454343456	493648768	31601500	14728114	16660125	16780406	15448461	15344629	15858151	16346956
862	6	52680	LC/MS Pos Late	100009072	2530	714.507						Lipids	Phospholipids	1,2-dilinoleoyl-GPA (18:2/18:2)*	158671152	152601776	144931856	158186912	153067248	157668848	155694416	104193040	105878784	112255064	146276448	138156000	148730688	83304928	74401792	104146696	106166192	116252512	109338344	108433376	109812232	113487448
864	22	52695	LC/MS Pos Late	100009086	2300	712.491						Lipids	Phospholipids	1-linoleoyl-2-linolenoyl-GPA (18:2/18:3)*	36566280	35343856	35452500	36535184	35148288	33065608	36401908	28432860	23894308	25837284	32483876	33391448	33383060	15869078	15046318	23782590	19570276	20073528	19848664	21003310	21885060	23411504	17209748	16186111	14957264	15382120	14364355	13006937	16445897	14105694
865	25	52690	LC/MS Neg	100009082	5483	433.236				HMDB07856		Lipids	Phospholipids	1-linoleoyl-GPA (18:2)*	571369	429476	341643	399939	1413174	840554	1027704	808087	456268	427626	295640	296143	192535	685406	623003	864947	612978	816281	429679	843543	1379689	1.98448e+06	345256	279364	195384	234592	212448	298642	263079	273661
866	37	52453	LC/MS Pos Late	100008981	2165	784.585						Lipids	Phospholipids	1-oleoyl-2-linoleoyl-GPC (18:1/18:2)*	94363960	87543432	93105848	98647744	194219088	193434784	202289808	79957144	65339736	78525288	110950376	111179304	113020520	158591280	130470880	195730016	77384840	81960296	80028568	176490240	176696928	196838960	16828914	9942362	12194350	12680258	11559810	10971062	10624580	8706632
867	38	52687	LC/MS Pos Late	100009078	2270	742.538		9546753		HMDB05349		Lipids	Phospholipids	1-oleoyl-2-linoleoyl-GPE (18:1/18:2)*	12215404	11469358	11497108	12958434	31189102	32083798	33101958	8637207	7436020	8388982	15576692	15410308	15970289	24948758	20867398	31213872	9628789	11244850	10431632	22103214	23493648	22931772	4593430	3293700	3567389	3.9383e+06	2821136	2479504	3.22859e+06	3.01233e+06
869	49	52694	LC/MS Pos Late	100009089	2526	688.491						Lipids	Phospholipids	1-palmitoyl-2-linolenoyl-GPA (16:0/18:3)*	11631385	11534752	11067697	11577831	14454464	15499376	15182698	11518763	10944322	12366960	12563480	13006965	13442682	7875754	12040334	10299186	9286687	9565864	10232568	11001651	12972278	11845339	22556576	22156320	22161628	18628162	13458561	13137418	17452108	14097311
870	46	52684	LC/MS Pos Late	100009076	2034	756.554						Lipids	Phospholipids	1-palmitoyl-2-alpha-linolenoyl-GPC (16:0/18:3n3)*	15065546	14457288	17508136	16271594	27857920	34013032	24683010	27816098	17885772	21909408	21597604	24770712	23753164	39451836	33902644	42109348	16679496	18644316	18569928	36317064	35724144	45222944	56639364	27601564	27306276	29076592	18172342	18409920	19911750	15916150
871	50	52678	LC/MS Pos Late	100009073	2520	762.528						Lipids	Phospholipids	1-palmitoyl-2-linolenoyl-GPG (16:0/18:3)*	1715205	1834307	2476909	3030886	6.12266e+06	5990387	3207936	3151659	1784479	1993083	3530818	3689886	2480023	5995739	5069060	6.78092e+06	1559039	1674847	1549289	4505374	2997391	4575097	1290776	900268	992221	877313	887388	942018	823468	648658
872	53	52679	LC/MS Pos Late	100009070	2820	690.507		9547167		HMDB07860		Lipids	Phospholipids	1-palmitoyl-2-linoleoyl-GPA (16:0/18:2)*	151913552	145248608	138785504	147207392	132976384	136594464	159232864	134832944	125304008	144849216	161882320	148156544	158820896	115864480	99404576	120169880	148762240	148280624	146313648	158903120	148775296	148342608	27266608	25770476	25110114	23567440	28979910	27987452	22592900	31540720
874	62	52669	LC/MS Pos Late	100009066	3140	854.575						Lipids	Phospholipids	1-palmitoyl-2-oleoyl-GPI (16:0/18:1)*	50553864	49063392	48708672	49925476	95651024	99736112	103402488	52712808	46753344	52983248	63432064	60053456	56399588	64225680	55322748	76781056	40467044	42647008	40599848	53843640	54797944	55270552	2942507	2169788	1867995	1707305	4248329	3366382	3126014	3178867
875	69	52452	LC/MS Pos Late	100008980	2380	786.601						Lipids	Phospholipids	1-stearoyl-2-linoleoyl-GPC (18:0/18:2)*	147067632	138091984	142086784	154279088	106408056	130688088	133149536	147757248	114013120	144834544	191455520	167355648	177845296	205966784	167004160	265378272	162421840	185967568	183069024	246229984	264850016	265727280	6628686	5146020	5981723	5919451	862362	1.26616e+06	1.432e+06	1232792
876	70	52446	LC/MS Pos Late	100008976	2522	744.554		9546749				Lipids	Phospholipids	1-stearoyl-2-linoleoyl-GPE (18:0/18:2)*	17264566	17371274	16930294	17249746	14517225	15152708	16342560	16999316	14297982	15074202	21582632	20927266	22266810	28108258	23746086	33002956	21094426	24682322	24725360	32947222	33712288	37719264	1963826	1630276	1919814	1667849	909248	927270	1.17436e+06	1.0068e+06
877	72	52438	LC/MS Pos Late	100008904	2644	788.616	56421-10-4					Lipids	Phospholipids	1-stearoyl-2-oleoyl-GPC (18:0/18:1)	58665544	55861696	57246468	65388936	124629048	116006984	127654448	53181648	45945252	56471340	69254768	67353888	71871504	75292576	63223096	89033344	52536720	60656736	59948668	90087784	88241936	92451384	2593452	2125340	2228957	2131436	2353972	2249768	2.02361e+06	2665411
878	235	48857	LC/MS Polar	100001619	2430	245.043		439964	C03274			Lipids	Phospholipids	glycerophosphoglycerol	350368576	406844160	375916416	371227776	473096416	460389440	466717280	467458176	440222624	378431168	204784176	214045984	212960640	483159744	451729760	444039520	493301760	526999360	518252960	486767904	507705952	519909344								43222
881	61	52448	LC/MS Pos Late	100000641	3206	766.559		5283509				Lipids	Phospholipids	1-palmitoyl-2-oleoyl-GPG (16:0/18:1)	32566592	31945188	31412992	32500668	81586680	76526080	80484328	34073544	32886826	33521652	39257600	38031704	36464900	54277752	47872288	56853748	34873688	36154040	36460796	42911368	46199408	44864988	2322763	1681158	1844659	1706098	2462566	2200279	2076501	1800419
883	11	52457	LC/MS Pos Late	100008905	2346	786.601	4235-95-4	10350317				Lipids	Phospholipids	1,2-dioleoyl-GPC (18:1/18:1)*	36635152	35241760	26387734	36913516	183225808	138100448	200133312	37312484	43690828	42463252	34416008	36683560	45186944	51299084	46650052	57358264	58631472	69342112	66839464	72795880	64883344	71550552	7.00094e+06	4585592	4570856	4895721	24491044	23055016	22194146	19937714
884	344	46798	LC/MS Pos Late	100002989	3115	636.556	106292-55-1					Lipids	Phospholipids	oleoyl-linoleoyl-glycerol (18:1/18:2) [1]	4232171	4805788	4319423	4154726	9562317	9751018	9634974	1997410	1491154	1619806	5584431	5276634	5579290	3765957	3612724	4463520	1420754	1146939	1324658	3032294	3540686	3469194	4755301	4882567	3636710	2752179	2496521	2116358	3236200	3143779
885	77	34437	LC/MS Neg	100001462	5816	511.304						Lipids	Phospholipids	1-stearoyl-GPG (18:0)	423343	294143	142813	138583	912176	556118	718074	156918	247595	150228	158903	194764	152493	231523	305014	318936	245371	269445	151161	191554	326836	290795
887	167	15506	LC/MS Pos Early	1256	1961	104.107	67-48-1	305	C00114	HMDB00097	CHOLINE	Lipids	Phospholipids	choline	2946776320	3047602688	2902224640	2936664832	3333704192	3363236608	3402359552	3101334016	3185131776	3117553664	2821501952	2752646656	2828187648	3270914304	3311684352	3244776448	3281056768	3242790656	3228017408	3565565952	3623441152	3532899584	1511930368	1451456256	1412999424	1407572736	1396073472	1455797248	1404727168	1347353344
888	168	34396	LC/MS Pos Early	267	700	184.073	72556-74-2	1014	C00588	HMDB01565	PHOSPHORYL-CHOLINE	Lipids	Phospholipids	choline phosphate	604098176	619844096	616898112	588405760	530181760	522152864	511566976	1051588800	960142208	942541696	750143040	772382080	798434880	483280928	489800832	480232768	1672105984	1643547008	1724436992	1237937792	1267232000	1333821952	308830880	266736784	262953008	261207856	190381312	214855488	196574000	180986016
889	195	1497	LC/MS Pos Early	420	1935	123.113	141-43-5	700	C00189	HMDB00149	ETHANOL-AMINE	Lipids	Phospholipids	ethanolamine	4452393	4780981	4922818	4505522	7.43127e+06	7497823	7086757	4317050	4563028	3.94507e+06	3724963	3499913	3.74518e+06	2515524	2743459	1011465	3.97928e+06	3.71156e+06	3689736	3642237	3660994	4217110	2082517	2.05359e+06	1690471	1556423	1645490	2189877	1824015	1545941
890	4	53179	LC/MS Pos Late	100009344	1800	778.538						Lipids	Phospholipids	1,2-dilinolenoyl-GPC (18:3/18:3)*	1704803	1300015	1651996	1.59047e+06	2750171	2907637	2753257	2569919	1869255	2234377	2637101	2945842	3165826	4053137	3.13096e+06	6900423	1943677	1707201	1.63278e+06	4589793	4318113	5221589	4743841	2752523	3.20632e+06	3538091	2563805	2225276	2298580	1799890
891	8	53174	LC/MS Pos Late	100009217	2083	740.522		9546812				Lipids	Phospholipids	1,2-dilinoleoyl-GPE (18:2/18:2)*	35584768	33903812	34362732	34365344	43360112	41982800	46460780	32322104	25002908	29373308	43442456	44089388	48379096	69865176	59952584	93443184	37586432	43931928	42614784	80921752	82427440	85347704	8.01452e+06	5988780	6606356	6601783	5790116	4964760	5798090	5919351
894	23	53176	LC/MS Pos Late	100009343	1939	780.554						Lipids	Phospholipids	1-linoleoyl-2-linolenoyl-GPC (18:2/18:3)*	46683792	42533440	50367300	49396572	53141444	50875500	50406364	56684856	40138260	48642252	56799036	63472340	63480224	98808928	76035240	145311472	45714508	46828112	47082856	102366960	101209496	112222912	10650114	5569370	6996697	7425008	8110948	7.85891e+06	7.85595e+06	6085902
899	73	42448	LC/MS Pos Late	100001856	2858	746.569						Lipids	Phospholipids	1-stearoyl-2-oleoyl-GPE (18:0/18:1)	5317739	4483120	5495182	4807502	10587576	11031895	8238108	5.08319e+06	3827430	4070359	5151285	7.36079e+06	5158900	9568743	8024212	7.50266e+06	3676414	4033862	4139385	5754916	4925649	8448814	303944	334559	339722	333512	317486	188960	207886	242522
900	12	52609	LC/MS Pos Late	100008906	2485	744.554	4004-05-01	9546757				Lipids	Phospholipids	1,2-dioleoyl-GPE (18:1/18:1)	3.35993e+06	2.89921e+06	2.218e+06	3.13196e+06	21615308	20755196	21828480	2.85011e+06	3.67177e+06	4.04264e+06	5293862	5.65789e+06	5.48364e+06	6.63384e+06	6788548	7276236	5.42332e+06	5556780	4896311	4163282	5.56798e+06	4248328	989927	689182	687242	868559	3.64861e+06	3349149	3453710	3.26473e+06
902	9	52734	LC/MS Pos Late	100009185	2388	876.56						Lipids	Phospholipids	1,2-dilinoleoyl-GPI (18:2/18:2)*	8767820	8528247	8182704	8907362	4.34812e+06	3630487	3429140	6458901	7087688	7142321	9202767	8498996	8465858	11993121	11384763	13649469	8405873	10565897	9419397	13104972	13919664	13146531
913	13	52619	LC/MS Pos Late	100008908	3121	880.591						Lipids	Phospholipids	1,2-dioleoyl-GPI (18:1/18:1)	5.25963e+06	4.57153e+06	4.13439e+06	4.16272e+06	13705287	12681576	12869239	3.74887e+06	2994892	3.87426e+06	6.61161e+06	6.00064e+06	6.74879e+06	6291106	4377669	8097279	3.4336e+06	3999757	2.99068e+06	4650527	5.28657e+06	4.62635e+06	161076	129817	117912	66234.1	1128102	1013594	989298	968724
914	58	19262	LC/MS Pos Late	1535	3293	692.522		5283523	C13889			Lipids	Phospholipids	1-palmitoyl-2-oleoyl-GPA (16:0/18:1)	81689256	77935328	76669904	83810000	111738344	113651384	105881280	56881728	60479892	64488156	75588272	72515584	74504952	55146364	36659320	41966140	60026164	61215668	58155316	51531364	57381392	62772640	6467652	6302596	5522953	7080544	12471506	8048473	4272634	10808960
915	35	52733	LC/MS Pos Late	100009180	2409	876.56						Lipids	Phospholipids	1-oleoyl-2-linolenoyl-GPI (18:1/18:3)*					6795418	7218817	7777866																2385973	1.93053e+06	2060069	1.83523e+06	3728651	3254393	3468525	2608844
918	71	52468	LC/MS Pos Late	100008994	3185	880.591						Lipids	Phospholipids	1-stearoyl-2-linoleoyl-GPI (18:0/18:2)	52685464	52465616	48907796	53887008	51050176	50473576	54434324	44014500	44181264	46967408	57802408	57375388	54544400	53584456	51773764	57959116	67469656	68607520	65865916	75134128	78529048	79209296	1.87758e+06	1.40148e+06	1760057	991818	3017173	2708996	2367489	2149963
921	3	57329	LC/MS Pos Late	100009117	2100	710.476		9547161				Lipids	Phospholipids	1,2-dilinolenoyl-GPA (18:3/18:3)*	1246693	1321652	1287352	1321491	1802381	1732998	1729065	1.45612e+06	992440	1229025	1430536	1.70407e+06	1.72823e+06	556530	1669872	1288055	724304	691510	930475	818963	1210043	1127750	9954243	9811600	9891618	8707112	6548620	6159809	7506035	5588109
922	10	19137	LC/MS Pos Late	100000634	3203	718.538						Lipids	Phospholipids	1,2-dioleoyl-GPA (18:1/18:1)*	25773408	24838308	23310716	32678192	73844168	74488936	68229728	15409376	18781474	18904116	26507870	22161440	25811636	21532648	10391018	12202180	27873904	27767800	26434100	17750718	18355892	19668288	2709848	2144189	2130255	3214726	5563886	3106185	2273746	4243850
923	36	57348	LC/MS Pos Late	100009093	2800	716.522						Lipids	Phospholipids	1-oleoyl-2-linoleoyl-GPA (18:1/18:2)*	64898772	62189976	59629768	69043944	114011064	117249912	121472296	38845452	40298160	45635908	66989160	63476088	67662112	43666752	33693064	41094128	43528828	41905448	42243068	48899596	45445368	46326216	14435478	13637463	11554937	11104157	14797442	11192784	13192852	13607876
924	34	57350	LC/MS Pos Late	100015599	2522	714.507						Lipids	Phospholipids	1-oleoyl-2-linolenoyl-GPA (18:1/18:3)																							24515064	23458828	23588024	21915564	23355444	20290122	21966014	24821374
925	68	57347	LC/MS Pos Late	100009091	3259	718.538				HMDB07861		Lipids	Phospholipids	1-stearoyl-2-linoleoyl-GPA (18:0/18:2)*	54412080	53921248	53241856	50427988	39552136	39061632	41188576	35193420	38535732	43453408	51379476	49915188	54779056	27996336	19851640	26112668	52248120	50125436	49281760	37781592	38980480	45566684	2.8704e+06	3991403	3432290	3086097	6851153	5844170	3009906	8166283
932	365	1510	LC/MS Pos Late	469	1367	318.3	554-62-1	122121	C12144	HMDB04610	PHYTOSPINGOSINE	Lipids	Sphingolipid	phytosphingosine	615750	536236	665218	614346	3077164	3419417	3102899	976712	873352	919734	1124686	1086414	1234504	1130580	1.02944e+06	1177712	471398	527005	490893	786585	843759	933713	966542	670611	604321	559537	433033	471123	510070	605036
933	398	17769	LC/MS Pos Late	313	1413	302.305	3102-56-5	3126	C00836	HMDB00269	DIHYDRO-SPHINGOSINE	Lipids	Sphingolipid	sphinganine																							271233	288605	229554	256467	196451	174896	193308	166794
945	161	27414	LC/MS Pos Late	100001033	3054	397.383	83-46-5	222284	C01753	HMDB00852	CPD-4143	Lipids	Sterols	beta-sitosterol	7604956	6509283	8132462	7217324	10806643	11934826	11213956	8.16863e+06	8808970	8829218	6905037	7433325	7070006	10359745	9419652	10609853	11119838	11477898	9938224	9926025	9731795	12218429	6413222	4008739	4025052	3574241	4633668	4168299	6723728	2982268
948	163	33997	LC/MS Pos Late	100001269	2873	383.367	474-62-4	173183	C01789	HMDB02869	CPD-707	Lipids	Sterols	campesterol	2960067	2969374	3064118	2969310	4304143	4579941	4662515	4.08453e+06	4197156	4124179	3027528	2977990	2613293	4634708	3997202	4381663	4958591	4806436	4393967	3997949	4766902	4597019	297553	169371	167310	130460	190327	186161	247460	85513
957	403	21183	LC/MS Pos Late	100000923	2875	395.367	83-48-7	5280794	C05442	HMDB00937	CPD-4162	Lipids	Sterols	stigmasterol	502202	502214	479606	495296	811323	805532	868722	633480	632486	594343	405451	366190	451075	1001629	1.01465e+06	838660	814415	778057	613153	843581	995090	1038636	440180	338471	461539				478781
1004	81	43761	LC/MS Pos Early	100004542	3160	146.118	1115-90-8	227939				Lipids	Fatty acid, Amino	2-aminoheptanoate	580960	656658	610434	697378	1.59485e+06	1.81159e+06	1.89583e+06	635322	666348	526258	713077	736456	967680	1060346	1034525	1191370	1010998	951413	926540	726268	824283	599804	328298	319313	286251	292678	94159	186347	134083	258492
1010	156	18362	LC/MS Neg	2029	1276	187.098	123-99-9	2266	C08261	HMDB00784		Lipids	Fatty acid, Dicarboxylate	azelate (nonanedioate)	4105083	4153730	4282480	4772583	10140258	11793382	8854921	4510623	4148292	3691552	3970442	4380278	4151930	5556594	5385904	4690456	4099705	4732380	4.18051e+06	5498660	6306766	5852818	1129792	1041398	1183191	1000739	874707	1057364	848333	754379
1013	287	15872	LC/MS Neg	818	612	103.004	141-82-2;26522-22-85-0	867	C00383	HMDB00691	MALONATE	Lipids	Fatty acid, Dicarboxylate	malonate	64316516	70544168	67325184	67320456	80486720	78853408	84642880	66669804	59184228	67782848	79005488	78533128	81905896	44122212	39448924	42681664	88492136	87208672	91566496	95996152	95795568	91696512	65623368	56546100	57657728	54466512	50734544	53116020	48697232	47127800
1014	366	15704	LC/MS Polar	100000101	2745	159.066	111-16-0	385	C02656	HMDB00857	CPD-205	Lipids	Fatty acid, Dicarboxylate	pimelate (heptanedioate)	982856	930873	938055	832928	1841457	1400798	1486819	2235341	1963885	1806067	834355	655156	659707	35336508	32305448	33255408	5371519	5927920	5526758	2224625	2468098	2300643	662230	531492	538219	491311	409422	403190	395466	385811
1016	404	15730	LC/MS Polar	100000016	2577.6	173.082	505-48-6	10457	C08278	HMDB00893	CPD0-1264	Lipids	Fatty acid, Dicarboxylate	suberate (octanedioate)	442915	535856	408544	577677	1141489	1156535	1096266	544258	691554	536046	455064	504851	435508	434474	574629	399275	483506	481038	347333	491189	368596	410022	330529	334517	394021	349135	440501	497562	504971	521541
1022	230	396	LC/MS Polar	339	2900	131.035	110-94-1	743	C00489	HMDB00661	GLUTARATE	Lipids	Fatty acid, Dicarboxylate	glutarate (pentanedioate)	6189008	6560082	6190718	6264770				7301575	7401998	6924558				7113188	6527572	5980479	5940457	6906281	6141354	9494065	10091346	9670775	935492	934981	855539	610122	643492	635880	656497	511056
1024	136	21134	LC/MS Polar	100000863	3000	145.051	124-04-9	196	C06104	HMDB00448	ADIPATE	Lipids	Fatty acid, Dicarboxylate	adipate	249552	504775	394730	360137	1213564	1316986	1164356	602134	691279	343840	712866	318340	584564	400851	445368	631743	391821	356153	425502	621960	634317	608633	356014	299461	463769	305152	366898	460693	525222	261398
1026	416	42964	LC/MS Neg	100004226	2833	227.129	6402-36-4	5283028	C16308	HMDB00933		Lipids	Fatty acid, Dicarboxylate	traumatic acid	17173536	19351620	18027060	19523210	107417728	121720752	117343920	11548995	10319887	10242152	25841752	23364908	21874202	10803307	9462021	9781661	6939249	8441078	6551648	9316587	11644553	9488480	2099229	1943888	1605829	1.64757e+06	487084	560851	462656	440994
1032	1	54892	LC/MS Pos Late	100009392	1941	954.615						Lipids	Galactolipids	1,2-dilinolenoyl-digalactosylglycerol (18:3/18:3)	7781776	7.86203e+06	9726161	8.35114e+06	13901137	13396798	12434557	8236799	5614524	6220826	9877370	11438914	10290863	10781060	8906695	12900144	5452740	5893285	5822278	8401112	7818002	10367383	6629833	6240476	6011948	4689514	6282108	6451446	5883104	5403062
1034	20	54896	LC/MS Pos Late	100010872	2073	956.63					GLYCOLIPID DESATURATION	Lipids	Galactolipids	1-linoleoyl-2-linolenoyl-digalactosylglycerol (18:2/18:3)*	3234632	3033039	4695738	3398102	5741869	5521359	4239134	4511423	2704781	2936983	5176504	7.31578e+06	5198840	3.50538e+06	3033066	2914980	3990407	4124950	3278057	3.69298e+06	3.59328e+06	6065389	1863994	1752318	1471356	1322732	1.87386e+06	1683143	1465100	1409685
1035	51	54887	LC/MS Pos Late	100010874	2498	934.646					GLYCOLIPID DESATURATION	Lipids	Galactolipids	1-palmitoyl-2-linoleoyl-digalactosylglycerol (16:0/18:2)*	7.77315e+06	8.03912e+06	8191412	8764042	12620771	13429050	12001477	10685975	10651143	11104255	13726870	13529913	13243323	8904992	8729132	9105079	13005757	14352570	12645282	15028883	15340186	14951825	1237571	1112675	973994	897437	960773	804841	999481	723153
1036	2	54891	LC/MS Pos Late	100010877	2046	792.562		5282287	C13871			Lipids	Galactolipids	1,2-dilinolenoyl-galactosylglycerol (18:3/18:3)*	16405603	15315577	11501752	17435336	12645958	12694787	19314820	9632063	10730631	12601630	20867204	12312742	19947648	8690163	7327160	27805484	12098289	10052066	10620666	18198072	17746584	12047218	6499909	7.41566e+06	6928632	5679720	12214920	13108945	12162095	10288113
1037	5	54899	LC/MS Pos Late	100010879	2415	796.593		6535011				Lipids	Galactolipids	1,2-dilinoleoyl-galactosylglycerol (18:2/18:2)*	8991954	8978732	8591651	9714809	11257550	10749172	12902847	7593309	7625193	8825117	17112702	15259773	17488838	7583359	6643650	11708507	11135376	11752569	11385739	11109249	11622707	9488466
1040	21	54898	LC/MS Pos Late	100010878	2209	794.578						Lipids	Galactolipids	1-linoleoyl-2-linolenoyl-galactosylglycerol (18:2/18:3)*	6203571	5832392	4386487	6887844	4409499	3.86324e+06	7494037	4850671	4832252	5506926	9775995	6589868	9490941	2999133	2553059	7502575	6.57322e+06	6.7757e+06	6494126	7.87762e+06	7398734	5.72224e+06	2586012	2334067	2112638	2168533	5266387	4809888	5116252	3.27253e+06
1041	47	54893	LC/MS Pos Late	100010875	2278	932.63					GLYCOLIPID DESATURATION	Lipids	Galactolipids	1-palmitoyl-2-linolenoyl-digalactosylglycerol (16:0/18:3)	5269567	5295731	5721021	5665125	9650096	8969678	9277262	6047909	5432876	5693111	7.7192e+06	8.06841e+06	7656530	10872533	10207831	11573894	5586827	6121374	5508097	8691647	9362757	10298037	3049641	2640358	2375716	2279560	1.70487e+06	1.62246e+06	1.67219e+06	1403893
1042	48	54900	LC/MS Pos Late	100010894	2455	770.578					GLYCOLIPID DESATURATION	Lipids	Galactolipids	1-palmitoyl-2-linolenoyl-galactosylglycerol (16:0/18:3)*	470555	446903	344022	388311	989128	781456	813085	520153	366177	469481	755402	848165	787447	1117250	993049	1134780	380087	422979	381079	778555	778812	766460	2264891	2.02664e+06	2381249	1.96166e+06	2003564	1.83637e+06	2140836	1353892
1043	52	54901	LC/MS Pos Late	100010893	2731	772.593						Lipids	Galactolipids	1-palmitoyl-2-linoleoyl-galactosylglycerol (16:0/18:2)*	2128250	2233276	1858994	1544159	3931894	4415841	4856182	2702716	2304478	2188987	4456298	5202500	5618864	2177658	2698063	4245089	2462444	2797644	2470668	3742440	4160333	1983382	852570	672947	641406	361317	968590	1061546	1130823	802595
1044	33	57352	LC/MS Pos Late	100015601	2448	796.593						Lipids	Galactolipids	1-oleoyl-2-linolenoyl-galactosylglycerol (18:1/18:3)*																							6454653	5430935	5360936	5106741	10544892	10368564	11635188	6.63995e+06
1045	185	57346	LC/MS Neg	100003065	781	415.146						Lipids	Galactolipids	digalactosylglycerol*	17136366	18145434	17510700	19700532	25503184	26804474	26209110	18537268	18942072	17921208	19349836	17497604	18890992	23503492	22131326	22259196	19775284	19890176	19697946	23789480	25910568	26817326	2348920	2530953	2061980	1986588	2425515	2590197	2285505	2324498
1046	204	57345	LC/MS Polar	100003064	2518	299.098	16232-91-0	16048618				Lipids	Galactolipids	galactosylglycerol*	4071771	4191153	4085501	4183861	7452968	7536647	7.12827e+06	8036477	7453002	6802005	4755332	4980846	4898519	8475189	8076187	8038404	6156682	6275469	6159241	8058748	8706222	8684877	463781	412325	426167	352114	588576	620397	613259	499194
1050	359	1508	LC/MS Neg	1024	1498.7	218.103	137-08-6	6613	C00864	HMDB00210	PANTOTHENATE	Cofactors, Prosthetic Groups, Electron Carriers	CoA metabolism	pantothenate	28275620	31191642	30476994	38624408	20806192	23724764	22392484	38904024	45156024	40719748	18204284	15964967	16483938	39771892	41911612	40847608	45698964	50941584	43600744	41486504	42005408	34991296	1134829	1.03829e+06	943185	821097	1417162	1699131	1524789	1354406
1057	330	594	LC/MS Pos Early	432	1942	123.055	98-92-0	936	C00153	HMDB01406	NIACINAMIDE	Cofactors, Prosthetic Groups, Electron Carriers	Nicotinate and nicotinamide metabolism	nicotinamide	11003115	12315087	9337012	12104274	8877968	9097433	11804984	8459026	9722691	10197485	9682127	7459573	9087174	7662058	7543893	9984297	8513322	8185969	8766478	9061736	9184619	7177967	2613913	2.58168e+06	2665002	2577317	886274	982557	1063016	1253531
1058	331	5278	LC/MS Neg	1310	1434	662.102	53-84-9	5893	C00003	HMDB00902	NAD	Cofactors, Prosthetic Groups, Electron Carriers	Nicotinate and nicotinamide metabolism	nicotinamide adenine dinucleotide (NAD+)	151279	157520	126973	157866	322361	397742	305775	182814	160045	165074	140015	134390	142341	252028	220847	238947	206039	214001	192509	249578	304168	263952	130343	116845	112299	98375	143582	141996	122815	127358
1062	332	22152	LC/MS Pos Early	1312	766	335.064	1094-61-7	14180	C00455	HMDB00229	NICOTINAMIDE_NUCLEOTIDE	Cofactors, Prosthetic Groups, Electron Carriers	Nicotinate and nicotinamide metabolism	nicotinamide ribonucleotide (NMN)	30362486	30381972	28090756	29283036	47059840	49117948	49806388	31277552	30865772	28135858	31804948	32546420	33412170	34340600	34417032	36115264	36488464	36903604	37128980	43881568	48264996	43656256	12728683	11374367	11544243	11558439	8579825	8702122	8.226e+06	8328049
1063	333	33013	LC/MS Pos Early	100001310	2040	255.098	1341-23-7	439924	C03150	HMDB00855	NICOTINAMIDE_RIBOSE	Cofactors, Prosthetic Groups, Electron Carriers	Nicotinate and nicotinamide metabolism	nicotinamide riboside	183440016	194382800	207892992	185756064	175277776	168497088	143387200	226124800	194966192	196742128	109572488	127600432	116000256	184179040	185362720	162778208	150894656	154202272	153157376	154258848	158965072	188330800	2.72344e+06	2831886	2241986	2051498	1110055	1502853	1223244	983888
1064	334	1504	LC/MS Neg	567	1180	122.025	59-67-6	938	C00253	HMDB01488	NIACINE	Cofactors, Prosthetic Groups, Electron Carriers	Nicotinate and nicotinamide metabolism	nicotinate	93726	100024	101229	129182	268620	309454	277576	101457	89179	99905	97378	109160	100367	153075	142381	142623	101864	168629	128248	136783	153489	114253	110907	107845	87910	106495	77906	69774	105026	78499
1066	335	33471	LC/MS Pos Early	100001316	1536	256.082	2625-49-2	161234	C05841	HMDB06809	NICOTINAMIDE_RIBOSE	Cofactors, Prosthetic Groups, Electron Carriers	Nicotinate and nicotinamide metabolism	nicotinate ribonucleoside	73342096	78278696	76158056	74005552	56421112	54566904	63028104	87591096	90510848	88854560	73730224	66670340	80537952	79504272	81156816	89755944	120817152	113896600	113561336	104460008	106132704	102581120	16787204	15070059	13428569	13721572	25760824	28991280	26943562	21823438
1067	417	32401	LC/MS Pos Early	100001092	1388	138.055	535-83-1	5570	C01004	HMDB00875	METHYLNICOTINATE	Cofactors, Prosthetic Groups, Electron Carriers	Nicotinate and nicotinamide metabolism	trigonelline (N'-methylnicotinate)	1132033024	1152774656	1173079936	1133800576	951240512	988207872	951234816	1007909632	959250560	957834432	964858944	1017640064	1055603264	944529152	917331136	915583232	1352935040	1315097088	1342033280	1036623168	1068169472	1087183744	37664740	32196684	32740472	33131780	55331472	60846244	54183064	47220256
1080	371	43023	LC/MS Neg	100004216	1370	162.042	22363-60-4	73000	C00715	HMDB00802		Cofactors, Prosthetic Groups, Electron Carriers	Folate Metabolism	pterin	15937			16439	38510	49622	48939	22743	19361	18014				30157	26122	29058				24965	33193	25218	67436	59417	59784	59042				10808
1083	295	37070	LC/MS Pos Early	100001805	544	113	7023-27-0	13130		HMDB61711		Cofactors, Prosthetic Groups, Electron Carriers	Oxidative phosphorylation	methylphosphate	15532036	17400622	16128154	14802098	21527736	23171584	25442644	3718027	17909370	15698564	12931622	12712566	11960446	9858920	12800994	3005415	16452452	10879777	9624217	11357207	11620460	13920228	6067627	7663494	6123479	4566698	4355144	4065969	4226087	3608511
1084	362	42109	LC/MS Pos Early	461	576	98.9842	7664-38-2	1061	C00009	HMDB01429	Pi	Cofactors, Prosthetic Groups, Electron Carriers	Oxidative phosphorylation	phosphate	81023472	84140328	78156912	79032384	147294048	136006480	143731520	84929136	86155880	80741200	86089584	84883944	89153248	65771088	67681224	68696536	109144464	106452352	105389088	111136360	110910792	113716240	31483564	27775116	27432020	28223252	33973328	39664832	37368328	34271248
1089	196	2134	LC/MS Neg	327	2425	784.15	146-14-5;84366-81-4	643975	C00016	HMDB01248	FAD	Cofactors, Prosthetic Groups, Electron Carriers	Riboflavin and FAD metabolism	flavin adenine dinucleotide (FAD)	174394	180418	150139	183329	287860	348791	310557	234702	229368	206010	184108	168455	195332	246453	248936	275992	212595	279286	230263	272018	279612	285675	84922	91660	79198	64958	62531	67435	58138	55505
1090	381	1827	LC/MS Pos Early	500	2292	377.146	83-88-5	493570	C00255	HMDB00244	RIBOFLAVIN	Cofactors, Prosthetic Groups, Electron Carriers	Riboflavin and FAD metabolism	riboflavin (Vitamin B2)	334233	375564	347448	323582	472284	494771	497297	474457	451039	351463	313170	307142	341461	340559	365733	353056	297793	377499	379761	422979	346583	370881
1091	197	15797	LC/MS Neg	100000251	2390	455.097	130-40-5	710	C00061	HMDB01520	FMN	Cofactors, Prosthetic Groups, Electron Carriers	Riboflavin and FAD metabolism	flavin mononucleotide (FMN)	121850	123102	128458	152059	198235	253261	252862	134485	116907	120141	195163	157343	156914	173002	146685	156302	125819	166451	136039	166123	181203	153478	70676	69867	49650	46150	51711	62175	55663	49597
1095	153	32354	LC/MS Pos Early	233	770	177.039	134-03-2		C00072	HMDB00044	ASCORBATE	Cofactors, Prosthetic Groups, Electron Carriers	Ascorbate metabolism	ascorbate (Vitamin C)	797337	767634	772678	742103	1206365	1562246	1223235	860067	880074	715957	906909	1.01001e+06	777185	757323	839909	654102	1412992	1265676	1210450	841591	952277	776448
1096	182	34302	LC/MS Neg	301	739.6	173.009	490-83-5	835	C05422	HMDB01264	L-DEHYDRO-ASCORBATE	Cofactors, Prosthetic Groups, Electron Carriers	Ascorbate metabolism	dehydroascorbate	104578408	100977384	89874256	107375192	73032432	83047400	95987032	61853700	69764640	78119016	79073216	65748992	74385640	68112632	64821292	88846144	72166280	89847832	81091056	75323768	75282168	70248744	3834623	3292841	3638065	3523667	3645135	3197322	3581730	7037192
1099	220	1476	LC/MS Polar	1020	3850	209.03	5793-88-4	33037	C00818	HMDB00663	D-GLUCARATE	Cofactors, Prosthetic Groups, Electron Carriers	Ascorbate metabolism	glucarate (saccharate)	668424192	713018624	776363328	752755328	156495296	151161456	148748560	1063091456	991412800	925248896	342450592	379815488	338146336	26863808	24725842	20871826	1652864000	1687482496	1623101952	780953600	829549120	935868864	925047	558889	575251	473980	1255893	1395824	1023744	610582
1102	410	27738	LC/MS Polar	100001022	2384	135.03	70753-61-6	151152	C01620	HMDB00943	L-THREONATE	Cofactors, Prosthetic Groups, Electron Carriers	Ascorbate metabolism	threonate	637612416	565881408	783479104	670898624	1167763200	1189165312	1144510592	579351296	688776000	699783296	509063328	615221760	593365696	643697664	645881152	441182048	581232704	487964672	578614272	509927712	562690240	577069120	112818312	134280944	122609152	110210592	81208824	84741648	75566440	71210584
1103	251	46957	LC/MS Polar	100001586	2750	195.051	20246-53-1	9794176		HMDB03290		Cofactors, Prosthetic Groups, Electron Carriers	Ascorbate metabolism	gulonate*	51677140	52468472	53617024	54945796	64393936	66351384	64536724	145441264	137716032	123320680	47870056	48172088	49719644	55163256	51248788	52900696	103656864	105072568	104595272	74288896	78407264	77107504	304215360	252380272	267712304	231248384	363699552	384406624	361395264	348810944
1106	162	568	LC/MS Pos Early	251	2253	245.095	58-85-5	171548	C00120	HMDB00030	BIOTIN	Cofactors, Prosthetic Groups, Electron Carriers	Biotin metabolism	biotin	1394243	1447592	1395443	1337379	965145	1046552	940853	1552283	1427288	1454873	683871	691982	625339	760829	779879	814029	1544956	1393507	1475891	1117262	1250244	1254358
1111	408	5341	LC/MS Pos Early	873	3050	265.112	59-43-8	1130	C00378	HMDB00235	THIAMINE	Cofactors, Prosthetic Groups, Electron Carriers	Thiamine metabolism	thiamin (Vitamin B1)	58332264	63101852	62068788	59224276	59073244	58467284	58758992	146137664	137092752	130396360	53412696	55466196	57873216	139898528	139073376	138283952	99400968	98662352	100314656	163218912	162429744	171956688	3039473	2789142	2435899	2384153	1992070	2202283	1.98955e+06	1701568
1112	409	15798	LC/MS Pos Early	523	2378	345.078	532-40-1	3382778	C01081	HMDB02666	THIAMINE-P	Cofactors, Prosthetic Groups, Electron Carriers	Thiamine metabolism	thiamin monophosphate	1014471	938145	912950	857233	2464608	2729217	2378543	1598649	1441648	1441674	1384614	1365210	1490269	2536444	2491753	2567443	2551680	2390128	2471528	3328499	3.2915e+06	3089470
1117	183	33418	LC/MS Pos Late	100001216	2259	402.349	119-13-1	92094	C14151	HMDB02902	DELTA-TOCOPHEROL	Cofactors, Prosthetic Groups, Electron Carriers	Tocopherol metabolism	delta-tocopherol	7892195	7504689	8857880	7594853	7.94108e+06	8.06203e+06	7257802	7403841	5601945	6411149	7280397	8657842	7342361	13011585	12238136	11212639	8303147	8535297	8190944	10553616	10307626	12310730	257692	145339	176545	151117	206316	161168	151570	251199
1120	217	52473	LC/MS Pos Late	100008998	2384	416.364						Cofactors, Prosthetic Groups, Electron Carriers	Tocopherol metabolism	gamma-tocopherol/beta-tocopherol	9807849	8728794	9854079	10701708	9423190	10501682	11897897	11361155	7.95232e+06	10772460	20897556	19474956	21624170	16369138	13970614	27327686	15788262	13066541	15331135	24643032	24561112	24341732	242335	130388	152268	138696	244632	291780	339430	484156
1124	373	1651	LC/MS Pos Early	491	2343	168.066	65-22-5	1050	C00250	HMDB01545	PYRIDOXAL	Cofactors, Prosthetic Groups, Electron Carriers	Vitamin B metabolism (B6 or B12)	pyridoxal	26141614	29249844	24837222	26189688	32351502	29882060	30383174	29030078	24402880	24549212	18107820	15883335	21214280	24088840	23695994	25715620	29603352	28006978	29285070	28468696	28173270	27166130	4.07725e+06	3633430	2972723	3045320	4.10417e+06	5240186	4388158	4146460
1126	374	2150	LC/MS Pos Early	568	2975	169.097	58052-48-5	1052	C00534	HMDB01431	PYRIDOXAMINE	Cofactors, Prosthetic Groups, Electron Carriers	Vitamin B metabolism (B6 or B12)	pyridoxamine	6152937	6548855	6644003	5856350	22561800	22947044	23032076	3539363	3481372	3308620	9845213	10692051	10944370	4230290	4454695	4216221	6459360	6660254	6475698	4607132	4732513	4718015	684411	687710	754547	630590	961094	945300	890684	801459
1127	375	31555	LC/MS Polar	100001121	846	182.046	82-82-6	6723	C00847	HMDB00017		Cofactors, Prosthetic Groups, Electron Carriers	Vitamin B metabolism (B6 or B12)	pyridoxate	1710677	1726982	1929011	1805364	3341216	3044793	2701245	2617026	2171315	2110252	1558011	1353318	1519519	2501736	2483762	2509629	2998559	3337966	3423454	1943147	2.07171e+06	1973498	48427		68432	34311	122951	121493	99053	107283
1128	376	608	LC/MS Neg	936	1657	168.067	58-56-0	1054	C00314	HMDB02075	PYRIDOXINE	Cofactors, Prosthetic Groups, Electron Carriers	Vitamin B metabolism (B6 or B12)	pyridoxine (Vitamin B6)	100675	120923	106473	117723	226015	262879	234116	84173	66875	57650	167104	130805	145865	49107	50624	49767	99954	106101	105001	104665	101549	105893	48153	35617	31606	31959	27698	38282	42199	25622
1139	29	1527	LC/MS Pos Early	54	2133	150.077	5142-22-3	78821	C02216	HMDB11599		Nucleotide	Purine metabolism	1-methyladenine	459089	586872	585501	501981	350244	397624	410601	683721	482726	416388	657091	550719	611802	506990	451522	390205	657285	708121	670057	897969	895945	719220	1837153	1465343	1304739	1188252	193331	198335	95397
1140	30	32395	LC/MS Pos Early	100001133	2200	166.072	938-85-2	70315		HMDB03282		Nucleotide	Purine metabolism	1-methylguanine	366466	368377	328518	251567	658039	620364	603986	388035	313568	313851	389736	396152	524041	355609	312423	254875	569322	721136	561554	490085	536509	594961	3856788	3313542	2783450	2801617	1286889	1621563	1433899	1288953
1142	83	1411	LC/MS Neg	348	1751	266.089	961-07-9	187790	C00330	HMDB00085	DEOXYGUANOSINE	Nucleotide	Purine metabolism	2'-deoxyguanosine	97122	128014	106132	128572	212092	263095	218623	110188	85652	98456	98248	91520	98066	112824	98789	114264	82043	117726	117405	98134	130550	104945	228602	187062	142046	130759	162503	136870	142224	137919
1149	129	554	LC/MS Pos Early	880	2221	136.062	73-24-5	190	C00147	HMDB00034	ADENINE	Nucleotide	Purine metabolism	adenine	142592400	153827792	148187104	145434944	518806048	508818560	486462976	97249016	89742608	88797464	90366328	94122840	96476160	49225940	51135516	46608444	70690784	70966816	70221496	64990536	63305864	67321568	693844800	629755264	584732352	599050304	441380000	496035232	438768736	430151168
1150	130	555	LC/MS Pos Early	798	2169	268.104	58-61-7	60961	C00212	HMDB00050	ADENOSINE	Nucleotide	Purine metabolism	adenosine	659221824	708014400	654599104	680505664	820479808	853286336	906975232	766208896	783114176	776803456	602304192	584558720	629738624	671799552	665046784	707038592	742035456	734445312	745518144	767343616	783407552	730154688	72577896	70863344	62468852	55115176	278819360	317444384	279896160	266910320
1151	131	36815	LC/MS Neg	100001694	1497.7	346.056	130-49-4	94136	C00946	HMDB11617	CPD-3705	Nucleotide	Purine metabolism	adenosine 2'-monophosphate (2'-AMP)	2.01607e+06	2143500	2098416	2632104	4019849	4774301	3.84214e+06	1546055	1591502	1483408	2648723	2210678	2065494	1459523	1428207	1338630	1626905	2138070	1531575	1.68033e+06	2189466	1779211	807049	711498	608282	590366	980637	1.00749e+06	988658	900421
1153	132	35142	LC/MS Neg	100001449	1245	346.056	84-21-9	41211	C01367	HMDB03540	CPD-3706	Nucleotide	Purine metabolism	adenosine 3'-monophosphate (3'-AMP)	244173	258395	292928	293232	648363	903956	642193	164360	122997	105700	212777	216197	200910	117078	96248	82772	129740	150822	128046	156111	182774	159330	1090388	1175109	994387	859058	1046989	1126620	1083162	1107465
1154	133	3108	LC/MS Neg	208	680	426.022	20398-34-9	6022	C00008	HMDB01341	ADP	Nucleotide	Purine metabolism	adenosine 5'-diphosphate (ADP)	202091	229086			558272	625994	660995	198665	236628	243018	497777	288310	509127	1175897	1106959	1147554	513058	425256	458348	741289	985034	841761
1155	134	32342	LC/MS Neg	209	822	346.056	149022-20-8	6083	C00020	HMDB00045	AMP	Nucleotide	Purine metabolism	adenosine 5'-monophosphate (AMP)	3877659	3667030	3652825	3895689	1775603	1844319	1741537	3339523	2833410	2644135	4771017	4739861	4575020	7112079	6421967	7315335	5466905	6228728	5719592	8.21667e+06	8702266	8312289	3.90135e+06	4256305	3604120	3531762	3828890	4332817	3634224	3664697
1156	135	37467	LC/MS Neg	72	1793	328.045	37063-35-7	2024	C02353	HMDB11616		Nucleotide	Purine metabolism	adenosine-2',3'-cyclic monophosphate	159663	301208	449177	510312	112833	146909	116627				447361	339048	299563				21392	31864	21684			11934	62235	68967	53360	45718	66818	81021	69920	63252
1157	303	35157	LC/MS Neg	100001415	2164	411.127	24719-82-2	161466		HMDB41623		Nucleotide	Purine metabolism	N6-carbamoylthreonyladenosine	55805	43830	37897	64956	64865	80497	71288	61076	58061	53902	42158	41213	23344	56476	51703	51582	58171	89986	61535	48592	52927	51679
1159	140	33434	LC/MS Neg	218	652	175.047	99-16-1	203	C00499	HMDB01209	ALLANTOATE	Nucleotide	Purine metabolism	allantoic acid					1464699	1612327	1419536	119877		197340	932672	872753	657791							2151402	2279969	2187637	5217662	4674027	3.97565e+06	4002359	2050125	1707405	2030576	1783667
1160	141	1107	LC/MS Polar	1002	1672	157.037	97-59-6	204	C02350	HMDB00462	ALLANTOIN	Nucleotide	Purine metabolism	allantoin	84981	56528		96531	877385	956709	848270	324757	236782	203928	576642	610809	589229	96382	136145	98323	142252	152197	166167	2280812	2.55299e+06	2517864	901644	768875	801574	694745	1065715	940146	903404	769016
1161	245	32352	LC/MS Neg	172	1330	150.042	73-40-5	764	C00242	HMDB00132	GUANINE	Nucleotide	Purine metabolism	guanine	474493	507951	518120	570877	1936888	2458896	1923289	615636	568928	542356	626911	549146	603146	220253	245709	249630	747828	1060868	826123	478709	611740	479888	11251833	10656228	9393831	8987550	14907748	16338086	14462623	13937115
1162	246	1573	LC/MS Neg	1099	1662	282.084	118-00-3	6802	C00387	HMDB00133	GUANOSINE	Nucleotide	Purine metabolism	guanosine	13731030	15330720	12714839	16437878	26189386	32032528	26007778	14045198	12958340	13468712	14211158	13447801	12381547	12965242	11905935	12025922	11924486	14998730	12558625	15758374	18263884	15574552	5719094	5816791	4897715	4883443	8649438	9570349	8797804	9535738
1164	249	2849	LC/MS Neg	347	653.2	362.051	5550-12-09	6804	C00144	HMDB01397	GMP	Nucleotide	Purine metabolism	guanosine 5'- monophosphate (5'-GMP)																							797832	658555	740525	682153	559080	469138	496455	572816
1165	250	37139	LC/MS Neg	74	1480	344.04	15718-49-7	92823	C06194	HMDB11629		Nucleotide	Purine metabolism	guanosine-2',3'-cyclic monophosphate	174061	303691	453958	545244	118181	155150	123625		18964		448960	307571	285093				41652		29679	35590	29821	29541	41228	76186	46370	29014	58404	76142	61706	70069
1168	260	1123	LC/MS Neg	361	1602.1	267.073	58-63-9	6021	C00294	HMDB00195	INOSINE	Nucleotide	Purine metabolism	inosine	947462	817602	1098985	1561700	1036884	1235956	1476283	736232	905106	1132960	978820	1057097	744790	955599	1035341	1.01569e+06	813887	1163020	859636	978902	1174890	1.04556e+06	263434	278522	238446	229699	426467	404531	460652	450380
1170	299	15650	LC/MS Pos Early	1242	2120	282.12	15763-06-1	27476	C02494	HMDB03331		Nucleotide	Purine metabolism	N1-methyladenosine																							429508	558656	440826	279273		528299	328927
1173	300	35137	LC/MS Pos Early	100001412	2210	312.13	2140-67-2	92919		HMDB04824		Nucleotide	Purine metabolism	N2,N2-dimethylguanosine																							235602	242618	163937	152964
1176	304	37114	LC/MS Pos Early	213	2264	282.12	1867-73-8	102175		HMDB04044		Nucleotide	Purine metabolism	N6-methyladenosine																							201532	155769	165605	144391	421568	495646	405304	315646
1178	438	3147	LC/MS Neg	1004	910	151.026	69-89-6	1188	C00385	HMDB00292	XANTHINE	Nucleotide	Purine metabolism	xanthine	80089	82038	65548	65861	86944	101267	85639	78770	86715	82826	87206	74971	74081	41411	46968	31414	68980	110372	103336	69698	70570	40615	500272	662805	476992	462190	273759	262561	293312	249594
1179	439	15136	LC/MS Neg	100000299	1075	283.068	146-80-5	64959	C01762	HMDB00299	XANTHOSINE	Nucleotide	Purine metabolism	xanthosine	88113	100635	102175	118531	87883	96144	93972	139499	152668	131617	102902	70809	85083	92669	74290	86189	150292	161270	153782	116397	134879	122764		23447			46519	45453	49478	62201
1182	248	39786	LC/MS Neg	100002704	773.9	362.051	117-68-0	3522				Nucleotide	Purine metabolism	guanosine 3'-monophosphate (3'-GMP)	115930	198604	197748	205603	255835	268251	337641		55417	75196	75371	80299	69561				71973		107118	113839	74108	55740	1300328	1469128	1178390	1069788	3005149	3326036	2852304	2922813
1189	305	48130	LC/MS Neg	100001664	980	382.1	4542-23-8			HMDB00912		Nucleotide	Purine metabolism	N6-succinyladenosine	1393547	1475373	1251767	1904379	3242177	4770787	3531559	891673	941078	886031	1555985	1321645	1303112	382955	434555	420303	300352	383064	307350	487813	589230	485234	475023	478822	366301	378445	444133	485441	437656	443661
1192	247	52442	LC/MS Neg	100002733	1241	362.051		444571				Nucleotide	Purine metabolism	guanosine 2'-monophosphate (2'-GMP)*																							329746	334043	259111	262545	441719	430116	413335	655444
1197	82	15949	LC/MS Pos Early	100000125	2193	228.098	951-77-9	13711	C00881	HMDB00014	DEOXYCYTIDINE	Nucleotide	Pyrimidine metabolism	2'-deoxycytidine	1355814	1536211	1523186	1320691	4892328	4532710	4.01985e+06	2154751	1818631	1.71177e+06	1339390	1355783	1459037	1955638	1895737	1.74418e+06	1187533	1165316	1175744	1.42157e+06	1.58107e+06	1654461	530036	448117	385750	332957	387280	508779	410028	416088
1200	99	1566	LC/MS Pos Early	1114	2215	104.071	10569-72-9;214139-20-5	64956	C05145	HMDB03911	3-AMINO-ISOBUTYRATE	Nucleotide	Pyrimidine metabolism	3-aminoisobutyrate		969109	622153		12728570	13094397	12417170	2062575	2055371	1582827	7824001	3961016	4251458		10890996	5495628	1969260	1849276	1791347	6715101	2107982							597483	334248	620588
1209	175	514	LC/MS Pos Early	827	2124	244.093	65-46-3	6175	C00475	HMDB00089	CYTIDINE	Nucleotide	Pyrimidine metabolism	cytidine	63113128	67505368	67550680	62614052	168336192	168992272	166210544	115711896	107469248	106851520	70972920	75839968	76613152	69083376	65414352	62574940	51323352	49590748	51580664	71261168	73400600	75021288	46826744	41121928	35623836	35429000	48945324	59149720	51176248	45566296
1210	178	2372	LC/MS Polar	282	4500	322.045	63-37-6	6131	C00055	HMDB00095	CMP	Nucleotide	Pyrimidine metabolism	cytidine 5'-monophosphate (5'-CMP)	1211378	1286192	1568096	1480985	1394992	1620182	1352041	1351668	1254765	1.4315e+06	941225	750273	1141082	2707103	3021642	3409165	1.87329e+06	2482157	2255135	3275998	3571686	3675983	767049	565563	571850	532813	264965	145583	293801	234489
1211	177	2959	LC/MS Neg	105	706.6	322.045	84-52-6	66535	C05822			Nucleotide	Pyrimidine metabolism	cytidine 3'-monophosphate (3'-CMP)																							560236		379207	456781	1485691	1.98915e+06	1668719	1706408
1212	179	573	LC/MS Pos Early	881	2060	112.051	71-30-7	597	C00380	HMDB00630	CYTOSINE	Nucleotide	Pyrimidine metabolism	cytosine	41823836	43663316	38918248	41620996	67001360	67319096	73103608	90534536	89262048	90078512	102012808	98147776	105582048	67992352	67756248	73171656	83597992	81940400	83131288	148234000	153613056	143497952	1139662	1014911	977003	1051435	706606	755905	911809	913518
1213	176	37465	LC/MS Polar	73	2368	304.034	15718-51-1	417654	C02354	HMDB11691		Nucleotide	Pyrimidine metabolism	cytidine 2',3'-cyclic monophosphate																							39663	51754	41338	30000	100965	137084	124517	119695
1214	186	601	LC/MS Polar	923	1910	157.025	155-54-4	648	C00337	HMDB03349	DI-H-OROTATE	Nucleotide	Pyrimidine metabolism	dihydroorotate	4161729	3441746	3764513	2998263	5313959	4905286	5303497	4288580	6874817	5442353	8627875	6.36967e+06	5370600	5940982	6.53793e+06	8571106	4614058	4196992	3638674	3.26728e+06	3.26155e+06	3240615
1215	189	35651	LC/MS Pos Early	100001635	1980	143.082	96702-03-3	126041	C06231			Nucleotide	Pyrimidine metabolism	ectoine	332952	273286		230395		57722	210521	188675	396948	309167	1429973	839803	1284580	2653611	2546914	4688799	656414	604019	749195	810626	572985	164548
1217	348	1505	LC/MS Polar	445	1638.1	155.01	50887-69-9	967	C00295	HMDB00226	OROTATE	Nucleotide	Pyrimidine metabolism	orotate	3861735	3.81609e+06	4346460	4124240	48848176	47313424	46208336	9970804	10848536	10090912	6204827	5203366	6.38276e+06	13813119	15141732	16630419	6206946	6597094	6492920	6488324	6524688	5640211	151613	130874	139853	115892	238067	247714	271178	230078
1218	349	35172	LC/MS Polar	100001416	2250	287.052	314-50-1	92751	C01103	HMDB00788	OROTIDINE-5-PHOSPHATE	Nucleotide	Pyrimidine metabolism	orotidine	800302	538311	463343	611943	922986	929750	715192	1405166	1.8186e+06	1606879	717297	737788	999588	184550			611460		676172	702100	816530	790830
1219	370	33442	LC/MS Neg	821	1100	243.062	1445-07-4	15047	C02067	HMDB00767		Nucleotide	Pyrimidine metabolism	pseudouridine	72484	87320	80843	93618	106510	142410	107383	79273	87052	73919	113828	116502	105440	86883	81044	90409	96117	97444	89156	176837	209157	195644	349224	312289	289973	288185	767039	715255	723348	893504
1220	413	2183	LC/MS Pos Early	872	1400	243.098	50-89-5	5789	C00214	HMDB00273	THYMIDINE	Nucleotide	Pyrimidine metabolism	thymidine	414253	384770	310693	460241	1905995	1.8104e+06	2153338	431306	492657	383674	512131	449404	618090	654157	638367	683421	210327	239098	295788	462905	488402	373328	115054	117246	149032	137232	87223	172876	158980	238121
1223	429	605	LC/MS Polar	825	1089.7	111.02	66-22-8	1174	C00106	HMDB00300	URACIL	Nucleotide	Pyrimidine metabolism	uracil	437790	493146	424803	647186	2332810	2552020	2627695	315225	450960	371771	536077	682520	652027	301335	406405	412701	347553	192457	295308	330317	430403	204292	3863292	3070015	2908621	2646008	1370234	1206396	1565516	1200271
1224	430	606	LC/MS Neg	535	1457.6	243.062	58-96-8	6029	C00299	HMDB00296	URIDINE	Nucleotide	Pyrimidine metabolism	uridine	28116516	28100716	25279370	30207000	60367576	85073080	71659712	29113336	28349862	28152556	30431830	29430292	22756900	21470014	18938246	18330652	25335894	35044656	26405280	19393608	23493626	21019548	12204882	15238068	9612895	9805442	11930821	11380409	11422072	9536399
1226	432	2856	LC/MS Neg	869	627	323.029	3387-36-8	6030	C00105	HMDB00288	UMP	Nucleotide	Pyrimidine metabolism	uridine 5'-monophosphate (UMP)	8934760	9119964	9209888	9362676	8439895	6.71841e+06	6631035	10539108	10483269	9541748	11702817	10698079	12295621	14047333	15306112	16475906	13246745	13663150	13387311	16005533	16557434	16918264	12920266	10819510	12099817	11588590	6181745	6.36475e+06	6.18634e+06	6.01201e+06
1227	433	37137	LC/MS Neg	75	1090	305.018	40632-52-8	439715	C02355	HMDB11640		Nucleotide	Pyrimidine metabolism	uridine-2',3'-cyclic monophosphate	74193	136052	217262	223555	113868	143936	131506				308414	194369	165269				22492	30139	21539	26090	18967	20056	83665	82406	70765	68146	203369	218872	192108	201780
1229	157	55	LC/MS Pos Early	244	1905	90.055	56-41-7;107-95-9	239	C00099	HMDB00056	B-ALANINE	Nucleotide	Pyrimidine metabolism	beta-alanine	26959384	28656236	27967160	27074580	197064544	201748864	198203296	70917768	63609248	64523920	132733648	131302880	137176368	150384688	152294736	154022272	62489444	61372160	62040020	61885164	63047064	64056916	45325436	42364304	38969912	38614024	48342072	60569152	51969984	53946400
1232	431	39764	LC/MS Neg	106	750	323.029	35170-0-7;35170-03-7	101543	C01368			Nucleotide	Pyrimidine metabolism	uridine 3'-monophosphate (3'-UMP)			141495	77419	416681	304969	444260		80893										139334		147260		2687539	2594220	2339514	2225908	4421624	4859462	4445525	4098850
1242	436	40475	LC/MS Neg	100003641	1506	173.093	686-43-1	136487		HMDB29127		Peptide	Dipeptide	valylglycine	162746	185966	165623	204288	312289	397032	288744	227613	228155	192505	173477	206108	136630	218523	270555	299693	153640	170980	162045	244223	244671	193567	1063065	922722	854003	769705	289313	407855	339405	267380
1258	139	37093	LC/MS Pos Early	100001890	3055	203.139	1638-60-4	259583		HMDB28691		Peptide	Dipeptide	alanylleucine	433230	468969	463866	401924	710070	554073	556158	752583	762849	706793	416372	462756	412715	696571	803420	669098	858079	948367	855495	760848	857575	892240	222503	247443	191474	259637	436755	437675	370849	334501
1273	424	41375	LC/MS Neg	100003598	1635	237.088	673-05-5	259323				Peptide	Dipeptide	tyrosylglycine	166229	166336	154198	216351	455253	475689	402576	173886	182865	184238	319248	225765	250966	224926	195071	186550	165387	154842	140888	214605	272851	227291	548211	393098	390955	377486	317960	322767	304148	283585
1281	241	36659	LC/MS Neg	100001790	1820	187.109	19461-38-2	88079		HMDB28844		Peptide	Dipeptide	glycylisoleucine	76005	88479	58721	66982	146816	131641	146232	73952	71888	80132	69190	62411	64448	117191	70341	88638	90139	88488	102294	120184	119420	86350	46715	47615	50643	37894	49799	56780	42869
1282	242	34398	LC/MS Neg	100001258	1890.6	187.109	869-19-2	92843	C02155	HMDB00759		Peptide	Dipeptide	glycylleucine	167550	171798	155900	272602	232065	369844	282297	278208	165556	181506	235620	168838	114579	259025	182771	151328	174725	309797	188374	243942	309809	228755	103351	103811	100054	75893	107040	85086	118605	74476
1291	243	18357	LC/MS Pos Early	100000487	2734	175.108	1963-21-9	97417		HMDB28854		Peptide	Dipeptide	glycylvaline	168404	199221	777557	381774	1119309	935225	578102	639821		390006	232915	659066		614706	682759		199895	297833	229003	335149	409622	1121129	1271984	1025548	1098316	968548	1042866	1204765	1055189	878371
1315	273	40045	LC/MS Pos Early	100003185	2778	189.123	686-50-0	79070				Peptide	Dipeptide	leucylglycine	1412973	1580965	1406218	1375892	2155669	1.96456e+06	1.94538e+06	1896660	1727822	1604971	1521079	1605128	1779884	1.77197e+06	1992615	1997904	1492808	1387556	1458571	1434164	1527936	1540343	3344267	2756394	2568872	2702420	1660043	1987875	1689782	1631420
1333	269	40008	LC/MS Neg	100003169	1992	187.109	868-28-0	342532				Peptide	Dipeptide	isoleucylglycine	245849	235078	257505	277133	343229	387584	292726	272292	258531	245587	250645	273480	226709	399212	415708	400057	237818	212948	248964	289165	378401	300007	1727730	1517268	1616837	1447810	363832	430959	476704	361365
1341	412	31530	LC/MS Neg	100001125	2322	265.119	16875-27-7	4099799;4099798				Peptide	Dipeptide	threonylphenylalanine	77080	86643	91968	113842	76319	107733	58500	133860	101828	105527	70121	71133	56035	145999	124128	161537	116622	139292	108601	108362	126753	105898	189463	170031	138006	149409	174570	191481	187377	147528
1352	284	40020	LC/MS Pos Early	100003196	3370	260.197	7369-79-1	4682588				Peptide	Dipeptide	lysylleucine	1693500	1663780	1680174	1588012	2437712	2455633	2415981	3290614	2740648	2860121	1463430	1580326	1534189	3903321	3747133	3784196	2251187	2000661	2285867	2932073	2844376	2971916	678954	643119	606418	521619	1473679	1933599	1649779	1150543
1359	437	39994	LC/MS Pos Early	100003210	3138	231.17	22906-55-4	352039		HMDB29131		Peptide	Dipeptide	valylleucine	1034545	1141613	1065194	1067352	1096001	1110436	1096622	1493104	1.36081e+06	1401393	909085	956429	1035382	1536290	1380049	1580049	1494695	1583941	1513464	1161126	1266213	1261330	1628825	1436510	1233662	1278298	1420989	1602179	1.5172e+06	1276840
1383	361	41370	LC/MS Pos Early	100003588	2898	223.108	721-90-4	98207				Peptide	Dipeptide	phenylalanylglycine	217995	252528	258000	190905	257695	263452	251025	417668	422292	331036	223137	263005	297465	401493	398108	419986	308443	423583	352410	321539	283741	294389	619337	512271	452962	540707	621004	644514	550951	541414
1401	435	42079	LC/MS Pos Early	100003640	2295	246.145	42854-54-6	5253209				Peptide	Dipeptide	valylglutamine	388954	489606	373150	380323	1171802	1.22047e+06	1233791	787287	695461	601298	457937	510803	574288	618284	541359	633556	478854	377042	433642	520306	492265	427075	1392020	1333064	1122662	1054786	968205	1202450	925603	907478
1464	421	43028	LC/MS Neg	100003609	2481	260.104	7360-09-0	263471				Peptide	Dipeptide	tryptophylglycine	43911	26680	31691	34935	49162	66068	47905	55570	49065	48605	21460	23240	18419	63879	59138	64468	43616	41513	49648	71478	77529	75794	36240	33473	20083	20357	46801	43803	46069	41129
1515	127	21156	LC/MS Neg	100000879	3170	263.129	14375-45-2	5280896	C06082	HMDB35140	CPD-693	Hormone metabolism	Abscisic acid metabolism	abscisate	30736304	30662164	25190140	33475620	36434936	45960668	40505900	21453460	22426844	20086944	19403112	17415380	18195310	17802420	17011684	17409340	8646037	10604157	8954357	14517076	18321924	17008272	452540	421418	350361	354585	1968449	2310530	1968637	1903070
1517	258	27513	LC/MS Pos Early	100001034	2850	176.071	6505-45-9	802	C00954	HMDB00197	INDOLE_ACETATE_AUXIN	Hormone metabolism	Auxin metabolism	indoleacetate	1084040	1000864	1115606	839633	1709207	1681770	1143975	11927757	10237802	9843447	144661	165792	127846	11008671	9589382	8.29058e+06	1766574	1850350	1753779	6.42347e+06	7334257	8072862	20846174	18767928	17984888	17725692	5658347	6431918	5876310	5363212
1520	259	39613	LC/MS Neg	100003110	1685	289.083	2456-73-7	446620		HMDB38666	INDOLE-3-ACETYL-ASP	Hormone metabolism	Auxin metabolism	indoleacetylaspartate	221026	232416	231306	306244	1144854	1475183	1171181	1351555	1416399	1193061	687861	521366	505409	1040886	843171	796632	496111	685576	514623	613112	926545	644782	71864	68879	45731	47380	67743	79331	74356	58610
1523	257	38116	LC/MS Neg	100002185	1708.8	160.04	771-50-6	69867	C19837	HMDB03320	CPD-13135	Hormone metabolism	Auxin metabolism	indole-3-carboxylic acid	63719	58391	60591	72159	104895	113206	92653	202760	211167	185751	56442	29107	29244	216572	220607	216967	116270	145748	113637	181249	233875	167555
1533	173	35660	LC/MS Polar	100001645	1516	113.036	6232-19-5	13538	C02512		CPD-603	Hormone metabolism	Ethylene metabolism	cyano-alanine	124850	148940	116958	117979	336132	329950	383367	110713	118608	112036	324884	217126	300265	147844	171595	194081	91660	110248	89498	157476	126402	130097
1560	388	45419	LC/MS Neg	100005462	2534	299.114	10338-51-9	159278				Secondary metabolism	Alkaloids	salidroside	174029	162122	145672	178587	866385	952168	960887	171013	149024	162155	144697	167506	149797	97444	99043	95767	82366	90799	84402	104016	131658	109885
1576	116	21133	LC/MS Polar	100000862	1305	137.024	99-96-7	135	C00156	HMDB00500	4-hydroxybenzoate	Secondary metabolism	Benzenoids	4-hydroxybenzoate	617392	715501	744405	758849	1068111	963588	1.01173e+06	487125	635480	649992	732685	311697	458336	385602	653505	579254	199409	451787	252119	722797	737933	633017					219172	524474	595948
1593	387	1515	LC/MS Polar	501	802	137.024	69-72-7	338	C00805	HMDB01895	CPD-110	Secondary metabolism	Benzenoids	salicylate	1398749	1478519	1192764	1307673	15401386	15542272	16689369	1.52064e+06	1815464	1438490	371076	372059	257660	522476	615364	845579	3887619	5216712	5108475	349961	330229	516289	486489	502553	480201	367840	707521	751370	696899	579129
1602	200	20881	LC/MS Polar	100000881	3950	209.03	526-99-8	3037071;3037582	C00879	HMDB00639		Secondary metabolism	Fatty acid and sugar derivatives	galactarate (mucic acid)	1037125760	1111055872	1311332224	1156738944	795571584	766351360	757000256	1558650112	1104259456	980215872	713328320	919902592	721932288	478070464	467445440	445003872	1482315136	1575400960	1521372544	851720192	868731840	1116496384	1178647	722723	864074	635407	568976	668358	846199	511899
1609	147	21189	LC/MS Neg	100000935	3845.4	269.046	520-36-5	5280443	C01477	HMDB02124	CPD-431	Secondary metabolism	Flavonoids	apigenin	62636	48746	33373	42173	1370083	861762	958332				36334			127921	98439	148352				31007	57916		542208	573652	562184	439405	180277	153983	161703	121068
1619	180	32453	LC/MS Neg	100001219	3566	253.051	486-66-8	5281708	C10208	HMDB03312	DAIDZEIN	Secondary metabolism	Flavonoids	daidzein					115524	170990	135629							246297	216781	258200							4923951	4361342	3996252	3.69767e+06	3.69312e+06	4123881	3.40433e+06	3245443
1620	181	32435	LC/MS Neg	100001218	3217	415.103	552-66-9	107971	C10216	HMDB33991	CPD-3424	Secondary metabolism	Flavonoids	daidzin																							189177	174747	139628	138099	135024	147561	151536	150519
1631	218	32448	LC/MS Neg	100001221	3754	269.046	446-72-0	5280961	C06563	HMDB03217	CPD-3141	Secondary metabolism	Flavonoids	genistein	82626	56015	59235	79873	254020	262868	244193	66745	75588	60491	55992	51229	46044	3913149	3289859	4.15936e+06	556351	675376	480262	115211	155992	116576	1862154	1755054	1543122	1407462	3896320	4315304	3873153	3245860
1633	239	34024	LC/MS Pos Early	100001222	3245	285.076	40957-83-3	5317750	C14536	HMDB05781		Secondary metabolism	Flavonoids	glycitein					708486	684710	644660																9414273	8335281	7.24082e+06	7172332	6049664	5932317	6091306	5090434
1634	240	32432	LC/MS Pos Early	100001217	2326	447.129	40426-10-4	187808	C16195	HMDB02219		Secondary metabolism	Flavonoids	glycitin																							1325752	1101672	1114582	1084381	436805	518865	387945	377977
1647	325	44663	LC/MS Neg	100000920	3437	271.061	67604-48-2	932	C00509	HMDB02670	NARINGENIN-CMPD	Secondary metabolism	Flavonoids	naringenin	369482	381495	336704	382450	347534	379049	345859	321068	359956	330541	203720	196033	181084	3026992	2825380	2970107	730242	809790	655293	436798	565995	520165	84925	67285	55047	47181	314461	335153	303938	277782
1766	219	48729	LC/MS Neg	100006372	1434	315.072	1820-89-9	10914066				Secondary metabolism	Phenylpropanoids	gentisic acid-5-glucoside	4962405	4668865	4208128	5431942	3.9069e+06	4814820	4148153	3367480	3540593	3313083	1147720	1187525	1.02975e+06	1.9343e+06	1890413	1.89205e+06	3530045	4306561	3589526	1134774	1388652	1220144	322993	326408	284040	262523	317288	324874	296672	306868
1811	394	43590	LC/MS Neg	100004481	5163	941.512	51330-27-9	122097	C08983	HMDB34649	cpd-13255	Secondary metabolism	Terpenoids	soyasaponin I	102802832	110286184	105036600	155692512	137407552	192489712	156140160	117129400	125160800	110892728	135703248	104112080	91527760	134633456	122978408	119510992	127516928	165262384	120213520	135389712	198737664	146114912	3126375	2567483	2787733	2447583	4673731	4340244	4848839	4486432
1812	395	43589	LC/MS Neg	100004482	5175	911.501	55319-36-3	171435	C12081	HMDB34650		Secondary metabolism	Terpenoids	soyasaponin II	48711864	52079752	44676392	64067516	23561324	31534944	26961744	49838356	49879900	46299400	39476496	31002744	28104014	65244384	57397480	61722120	60550476	94470176	64011020	63522104	94628032	67157016	526318	406489	482813	471623	717848	659592	769055	740216
1832	102	531	LC/MS Polar	112	2700	161.046	503-49-1	1662	C03761	HMDB00355		Secondary metabolism	Terpenoids	3-hydroxy-3-methylglutarate	29027748	30152682	25999210	31733204	36942484	39320344	40700400	42937268	43910992	42755672	32534940	24810432	32333650	61570332	58934792	66718692	54714916	58272264	59392656	43504496	41263812	34680656	5761720	5265386	4942173	4586568	6129889	5887227	5740997	5617890
1835	396	54925	LC/MS Neg	100010905	5176	795.454			C19865			Secondary metabolism	Terpenoids	soyasaponin III	22497774	22715428	18632346	28976448	19448516	26319968	22309162	15940690	16620637	15264731	16262010	12476081	10931609	15891367	13258424	14591846	21176052	35902884	22193324	15402515	25141954	16489946	370563	309134	301900	287821	417250	377327	403036	381494
1906	418	40406	LC/MS Pos Early	100003397	2100	76.0757	1184-78-7	1145	C01104	HMDB00925		Xenobiotics	Chemicals	trimethylamine N-oxide	352504	286351	278914		578994	621611	715650	382985	503331	444866	230340	243449	162170	391218	262575	577867	568062	725931	773496	697534	898836	866884			81070		136374	102632	66067

## Sheet: Scaled Imputed Data
														SAMPLE NAME	UNAZ-00414	UNAZ-00415	UNAZ-00416	UNAZ-00417	UNAZ-00418	UNAZ-00419	UNAZ-00420	UNAZ-00421	UNAZ-00422	UNAZ-00423	UNAZ-00424	UNAZ-00425	UNAZ-00426	UNAZ-00427	UNAZ-00428	UNAZ-00429	UNAZ-00430	UNAZ-00431	UNAZ-00432	UNAZ-00433	UNAZ-00434	UNAZ-00435	UNAZ-00436	UNAZ-00437	UNAZ-00438	UNAZ-00439	UNAZ-00440	UNAZ-00441	UNAZ-00442	UNAZ-00443
														CLIENT IDENTIFIER	1_1	1_2	1_3	1_4	2_1	2_2	2_3	3_1	3_2	3_3	4_1	4_2	4_3	5_1	5_2	5_3	6_1	6_2	6_3	7_1	7_2	7_3	8_1	8_2	8_3	8_4	9_1	9_2	9_3	9_4
														SAMPLE ID	3109190	3109184	3109209	3109214	3109193	3109191	3109212	3109181	3109194	3109210	3109208	3109207	3109188	3109195	3109205	3109200	3109182	3109196	3109186	3109192	3109202	3109211	3109201	3109185	3109187	3109199	3109197	3109183	3109203	3109204
														PARENT SAMPLE ID	3088056	3088057	3088058	3088059	3088060	3088061	3088062	3088063	3088064	3088065	3088066	3088067	3088068	3088069	3088070	3088071	3088072	3088073	3088074	3088075	3088076	3088077	3088078	3088079	3088080	3088081	3088082	3088083	3088084	3088085
														BRADFORD PROTEIN	14.319				24.883			14.201			18.072			23.439			20.712			27.893			1.291			1.785
														CLIENT MATRIX	seed	seed	seed	seed	seed	seed	seed	seed	seed	seed	seed	seed	seed	seed	seed	seed	seed	seed	seed	seed	seed	seed	aleurone	aleurone	aleurone	aleurone	Aleurone	Aleurone	Aleurone	Aleurone
														GROUP	Jack Control	Jack Control	Jack Control	Jack Control	AiP7	AiP7	AiP7	AiP10	AiP10	AiP10	AiPR4	AiPR4	AiPR4	ATB2	ATB2	ATB2	ATB33	ATB33	ATB33	ATBR4	ATBR4	ATBR4	Jack Aleu	Jack Aleu	Jack Aleu	Jack Aleu	SP	SP	SP	SP
														GROUP DESCRIPTION					1 ABA signal	1 ABA signal	1 ABA signal							2 sugar control	2 sugar control	2 sugar control							Aleurone	Aleurone	Aleurone	Aleurone
														GROUP NUMBER	1, 2, 3	1, 2, 3	1, 2, 3	1, 2, 3	1	1	1	1	1	1	1	1	1	2	2	2	2	2	2	2	2	2	3	3	3	3	3	3	3	3
														SAMPLE NUMBER	1	1	1	1	2	2	2	3	3	3	4	4	4	5	5	5	6	6	6	7	7	7	8	8	8	8	9	9	9	9
PATHWAY ORDER	ALPHA	COMP ID	PLATFORM	CHEMICAL ID	RI	MASS	CAS	PUBCHEM	KEGG	HMDB	PLANTCYC	SUPER PATHWAY	SUB PATHWAY	BIOCHEMICAL	UNAZ-00414	UNAZ-00415	UNAZ-00416	UNAZ-00417	UNAZ-00418	UNAZ-00419	UNAZ-00420	UNAZ-00421	UNAZ-00422	UNAZ-00423	UNAZ-00424	UNAZ-00425	UNAZ-00426	UNAZ-00427	UNAZ-00428	UNAZ-00429	UNAZ-00430	UNAZ-00431	UNAZ-00432	UNAZ-00433	UNAZ-00434	UNAZ-00435	UNAZ-00436	UNAZ-00437	UNAZ-00438	UNAZ-00439	UNAZ-00440	UNAZ-00441	UNAZ-00442	UNAZ-00443
2	160	3141	LC/MS Pos Early	799	1064	118.086	107-43-7	247	C00719	HMDB00043	BETAINE	Amino acid	Serine family (phosphoglycerate derived)	betaine	0.9686	1.0161	1.0305	0.9563	1.0037	0.9778	0.9847	1.1402	1.0786	1.0786	0.9594	0.9963	0.9925	2.8738	2.8833	2.8831	1.205	1.2111	1.2063	1.3295	1.3781	1.4074	0.0407	0.0349	0.0348	0.0356	0.0583	0.064	0.062	0.0576
4	174	1868	LC/MS Pos Early	800	1488	122.027	52-90-4;56-89-3	5862	C00097	HMDB00574	CYS	Amino acid	Serine family (phosphoglycerate derived)	cysteine	0.8052	0.9004	1.1909	0.9978	2.3243	2.489	2.2564	1.5512	1.409	1.7996	0.9506	1.0022	1.0267	4.0451	3.6451	2.8719	0.8797	0.7273	0.896	1.2585	1.6433	1.6907	0.2786	0.2333	0.3163	0.2983	0.4317	0.4071	0.4466	0.299
7	188	5086	LC/MS Pos Early	806	1104	104.071	1118-68-9	673	C01026	HMDB00092		Amino acid	Serine family (phosphoglycerate derived)	dimethylglycine	0.7641	0.7288	0.7413	0.8271	1.8487	1.9345	1.128	0.9182	0.6054	0.6958	1.421	1.5984	1.2999	1.9738	1.7984	1.6218	0.8824	0.6242	1.0402	0.8013	1.0133	0.9867	0.6054	0.6054	0.6054	0.6054	0.6054	0.6054	0.6054	0.6054
8	238	58	LC/MS Pos Early	340	1375	76.0393	56-40-6	750	C00037	HMDB00123	GLY	Amino acid	Serine family (phosphoglycerate derived)	glycine	0.4924	0.514	0.5472	0.4949	2.3298	2.2663	2.2643	0.6374	0.6084	0.5683	1.0816	1.1014	1.1093	1.1165	1.1067	1.0946	0.6114	0.6322	0.6167	0.8514	0.8705	0.9264	1.1222	1.0177	0.9823	0.9693	1.3495	1.4795	1.4032	1.1763
13	322	37076	LC/MS Pos Early	100001851	811	148.06	97-14-3	65249		HMDB02931	ACETYLSERINE	Amino acid	Serine family (phosphoglycerate derived)	N-acetylserine	0.8205	0.8246	0.843	0.8858	1.2123	1.2034	1.3695	1.1117	1.198	1.1011	0.7967	0.752	0.8155	1.8445	1.7956	1.7391	1.0776	1.1166	1.0516	1.0394	0.9985	0.9302	1.0211	0.9131	1.0015	0.9599	0.7905	0.8102	0.838	0.7796
16	391	1648	LC/MS Pos Early	503	1239	106.05	56-45-1	5951	C00065	HMDB00187	SER	Amino acid	Serine family (phosphoglycerate derived)	serine	0.5272	0.5644	0.5115	0.5402	2.5684	2.5714	2.7902	0.7259	0.7519	0.7239	1.2378	1.1773	1.2587	1.3871	1.378	1.4876	0.8803	0.8681	0.8804	0.9397	0.9388	0.8753	1.086	1.0095	0.9871	0.9905	1.2819	1.3945	1.289	1.2674
19	389	47897	LC/MS Pos Early	100002324	1490	180.033	638-23-3	1080	C03727	HMDB29415		Amino acid	Serine family (phosphoglycerate derived)	S-carboxymethyl-L-cysteine	0.3434	0.4995	0.4799	0.7543	0.9723	1.5103	1.6092	0.6416	0.913	0.6378	1.0277	1.0877	0.9111	2.5939	2.7007	2.2907	0.6194	0.5823	0.5377	0.6909	0.8298	0.6161	7.062	9.0584	8.3215	9.5385	12.5971	11.486	10.7042	11.9574
24	407	46960	LC/MS Neg	100002528	616	96.9601	14808-79-8	1118	C00059	HMDB01448		Amino acid	Serine family (phosphoglycerate derived)	sulfate*	1.0008	0.998	0.9992	1.0416	1.9653	2.0564	2.0367	1.0151	0.9005	0.8995	0.5029	0.5013	0.5175	2.925	2.6645	2.9564	1.1173	1.1224	1.1649	2.797	2.7435	2.7721	0.6029	0.5613	0.5669	0.5177	0.7967	0.8546	0.7904	0.7236
31	93	53229	LC/MS Pos Early	100009246	1652	120.066		94309				Amino acid	Serine family (phosphoglycerate derived)	2-methylserine	0.9158	1.0178	0.9969	0.8995	1.8618	1.9441	1.6983	1.1363	1.0017	0.9983	1.3269	1.4392	1.4527	1.6536	1.7364	1.7382	0.8102	0.8058	0.8277	1.0332	1.0934	1.1357	0.1826	0.1636	0.1297	0.1423	0.2759	0.2992	0.2481	0.2214
32	98	32197	LC/MS Neg	240	1379	181.051	6482-98-0	9378	C03672	HMDB00755	CPD-2222	Amino acid	Aromatic amino acid metabolism (PEP derived)	3-(4-hydroxyphenyl)lactate	1.7601	1.7936	1.5094	1.8059	6.7885	7.8509	7.2282	0.8914	0.6418	0.7125	0.6494	1.0246	0.6061	0.8484	0.607	0.7759	0.5669	0.7824	0.866	1.3611	1.7961	1.4844	0.9223	0.7572	0.9754	0.8065	1.0778	1.1175	1.3721	1.0502
39	117	1669	LC/MS Neg	1141	1690.1	179.035	156-39-8	979	C01179	HMDB00707	P-HYDROXY-PHENYLPYRUVATE	Amino acid	Aromatic amino acid metabolism (PEP derived)	4-hydroxyphenylpyruvate	1.1207	1.3023	1.0542	1.6113	1.7403	2.849	2.0248	1.0848	0.8301	0.9235	0.7097	0.7676	0.5619	2.0945	1.9	1.7152	0.9458	1.2213	0.8583	1.3433	2.0626	1.1737	0.7246	0.7666	0.5508	0.601	0.2956	0.2803	0.2363	0.2678
42	146	4970	LC/MS Pos Early	1258	2606	138.055	118-92-3	227	C00108	HMDB01123	ANTHRANILATE	Amino acid	Aromatic amino acid metabolism (PEP derived)	anthranilate	0.7049	0.7049	0.7049	0.7049	0.7049	0.7049	0.7049	0.7049	0.7049	0.7049	0.7049	0.7049	0.7049	0.7049	0.7049	0.7049	0.7049	0.7049	0.7049	0.7049	0.7049	0.7049	1.4455	0.8946	0.7049	1.1054	0.7049	0.7049	0.7049	0.7049
51	270	1417	LC/MS Neg	98	2224	188.035	492-27-3	3845	C01717	HMDB00715		Amino acid	Aromatic amino acid metabolism (PEP derived)	kynurenate	0.2667	0.2667	0.2667	0.4075	5.6197	7.0796	4.9961	0.985	1.015	0.9316	1.0587	0.7871	0.7328	1.7621	1.5856	1.7233	0.7353	1.0918	0.6002	1.2363	1.7645	1.2637	0.4349	0.4683	0.462	0.334	0.2667	0.2667	0.2667	0.2667
54	319	33950	LC/MS Neg	100001256	2597	206.082	2018-61-3	74839	C03519	HMDB00512		Amino acid	Aromatic amino acid metabolism (PEP derived)	N-acetylphenylalanine	0.7691	0.9625	0.6686	0.7583	2.6447	3.3456	2.7144	1.2156	0.9951	1.0287	1.0485	0.7989	0.7412	1.1174	1.0049	1.1105	1.472	1.4514	1.4754	1.1018	1.6892	1.3257	0.8464	0.7639	0.6822	0.3937	0.4247	0.3356	0.3345	0.4618
56	323	33959	LC/MS Neg	100001254	2630	245.093	1218-34-4	700653	C03137	HMDB13713		Amino acid	Aromatic amino acid metabolism (PEP derived)	N-acetyltryptophan	0.1635	0.2197	0.1868	0.2007	0.9469	1.2311	1	3.9748	3.8349	3.7295	0.0534	0.0534	0.0534	3.062	3.2681	3.5884	0.8256	0.9406	0.9069	2.8526	3.582	3.0416	0.0534	0.0534	0.0534	0.0534	0.0534	0.0534	0.0605	0.0534
63	360	64	LC/MS Pos Early	460	2878	166.086	63-91-2	6140	C00079	HMDB00159	PHE	Amino acid	Aromatic amino acid metabolism (PEP derived)	phenylalanine	0.709	0.7399	0.6997	0.6733	2.2062	2.1954	2.2095	0.9439	0.9392	0.9088	0.7976	0.8017	0.8624	1.5838	1.5909	1.6435	1.0382	1.012	1.0419	0.9976	1.0206	1.0024	0.806	0.7327	0.7038	0.7086	1.184	1.3108	1.2465	1.1748
66	379	18335	LC/MS Polar	100000442	2432.9	191.056	77-95-2	6508	C00296	HMDB03072	QUINATE	Amino acid	Aromatic amino acid metabolism (PEP derived)	quinate	0.9484	0.9717	1.4205	1.2996	1.1614	1.9491	1.3852	1.0786	1.1713	0.5515	1.4775	1.0889	1.1907	1.6139	0.9991	1.394	0.6992	0.9379	0.6169	1.0064	1.0265	1.0009	0.3894	0.3741	0.8098	0.3115	0.3991	0.396	0.3629	0.4055
68	392	15144	LC/MS Polar	100000293	2725	173.046	138-59-0	8742	C00493	HMDB03070	SHIKIMATE	Amino acid	Aromatic amino acid metabolism (PEP derived)	shikimate	0.83	0.8882	0.8869	0.8492	2.7543	2.803	2.5591	0.7975	0.7289	0.6959	1.5061	1.7057	1.4957	1.5222	1.435	1.2781	0.6867	0.7282	0.7072	1.0004	0.9996	1.0804	1.6773	1.5406	1.4853	1.427	0.4898	0.5327	0.5371	0.463
69	420	54	LC/MS Pos Early	565	2986	205.097	73-22-3	6305	C00078	HMDB00929	TRP	Amino acid	Aromatic amino acid metabolism (PEP derived)	tryptophan	0.518	0.5446	0.5706	0.5125	1.858	1.8367	1.7585	5.0574	4.7315	4.5689	0.0433	0.0521	0.0459	6.3205	6.3077	6.2551	1.4382	1.446	1.4294	3.6963	3.6526	3.8056	0.0689	0.0606	0.0583	0.0574	0.2584	0.2838	0.2637	0.2124
71	423	1299	LC/MS Pos Early	815	2430	182.081	60-18-4	6057	C00082	HMDB00158	TYR	Amino acid	Aromatic amino acid metabolism (PEP derived)	tyrosine	0.6569	0.7166	0.5723	0.6622	2.3843	2.6963	2.6683	0.9542	0.9031	0.8253	1.0547	0.9763	1.0237	1.1136	1.0767	1.2148	1.1939	1.0966	1.1398	0.9309	0.9196	0.8408	0.8519	0.9019	0.8949	0.8873	1.1647	1.1896	1.06	1.0799
82	350	45413	LC/MS Neg	100005384	990	260.023		514186				Amino acid	Aromatic amino acid metabolism (PEP derived)	O-sulfo-L-tyrosine	0.7884	0.8342	0.7749	1.0268	1.2246	1.6193	1.1702	1.027	0.9764	0.878	1.1905	1.2071	1.1099	0.7755	0.8162	0.7687	0.9445	1.1275	0.9542	0.9726	1.4948	1.0236	0.6811	0.6176	0.599	0.6115	1.0537	1.0833	1.0353	1.0498
83	419	6104	LC/MS Pos Early	1095	3062	161.107	61-54-1	1150	C00398	HMDB00303	TRYPTAMINE	Amino acid	Aromatic amino acid metabolism (PEP derived)	tryptamine	0.2617	0.2617	0.2617	0.2617	0.2617	0.2617	0.2617	1.9453	1.8666	2.2223	0.2617	0.2617	0.2617	1.0916	1.1765	1.1752	0.3923	0.2617	0.473	0.8413	0.7297	0.9084	0.2617	0.2617	0.2617	0.2617	0.2617	0.2617	0.2617	0.2617
85	422	1603	LC/MS Pos Early	1133	2540	138.091	60-19-5	5610	C00483	HMDB00306	TYRAMINE	Amino acid	Aromatic amino acid metabolism (PEP derived)	tyramine	0.7568	0.7568	0.7568	0.7568	7.2615	6.6409	7.4858	0.7568	0.7568	0.7568	0.7568	0.8478	0.7568	0.7568	0.7568	1.0382	0.8713	0.7568	0.9618	0.7568	0.7568	0.7568	0.7568	0.7568	0.7568	0.7568	0.7568	0.7568	0.7568	0.7568
91	328	48433	LC/MS Neg	100006056	2400	192.067	13200-85-6	759256				Amino acid	Aromatic amino acid metabolism (PEP derived)	N-formylphenylalanine	0.7791	0.7745	0.7394	0.8942	1.7632	2.3065	2.0409	1.3705	1.2422	1.2185	0.4087	0.5878	0.7011	1.1686	1.1186	1.1415	1.4127	1.6844	1.2944	1.0642	1.1352	1	0.3024	0.3376	0.3081	0.2429	0.2568	0.0945	0.0945	0.221
112	80	6146	LC/MS Polar	381	3500	160.062	542-32-5;1118-90-7	469	C00956	HMDB00510	CPD-468	Amino acid	Aspartate family (OAA derived)	2-aminoadipate	0.983	1.0563	0.9502	0.9766	1.4802	1.5272	1.6208	0.9588	0.9383	0.803	1.1599	1.1709	1.2755	2.7121	2.6667	2.7949	1.0017	1.0095	0.9983	1.8894	1.9412	2.0578	0.3622	0.3156	0.3165	0.31	0.4648	0.5027	0.4654	0.4231
113	95	38347	LC/MS Polar	92	2633.1	159.03	3184-35-8	71	C00322	HMDB00225	2K-ADIPATE	Amino acid	Aspartate family (OAA derived)	2-oxoadipate	1.0507	1.201	1.1183	1.291	0.7417	0.7405	0.7646	1.396	1.3442	1.2193	0.5036	0.4684	0.5033	2.3688	2.312	2.3845	0.9493	1.0721	1.0597	2.9662	3.0688	2.7547	0.0743	0.0627	0.062	0.053	0.0368	0.04	0.0363	0.0351
114	138	1126	LC/MS Pos Early	811	1700	90.055	56-41-7	5950	C00041	HMDB00161	L-ALPHA-ALANINE	Amino acid	Aspartate family (OAA derived)	alanine	0.7739	0.79	0.7548	0.7537	3.227	3.2306	3.326	0.7349	0.6947	0.6908	1.6021	1.5675	1.6491	1.0749	1.0947	1.1302	1.001	0.984	0.999	0.9765	1.0183	0.9938	0.9647	0.8757	0.8618	0.8601	1.4269	1.6106	1.499	1.4666
116	154	512	LC/MS Pos Early	917	1225	133.061	70-47-3	6267	C00152	HMDB00168	ASN	Amino acid	Aspartate family (OAA derived)	asparagine	0.2983	0.3216	0.3119	0.299	6.5325	6.6343	6.5485	0.9578	0.9206	0.9029	3.601	3.6476	3.8483	2.2893	2.3059	2.323	1.1074	1.0761	1.0908	1.0492	1.0422	1.0541	0.5397	0.481	0.474	0.4781	0.1764	0.1885	0.1765	0.166
117	155	443	LC/MS Pos Early	234	1165	134.045	56-84-8	5960	C00049	HMDB00191	L-ASPARTATE	Amino acid	Aspartate family (OAA derived)	aspartate	0.4465	0.4623	0.4676	0.434	2.698	2.7422	2.398	0.6659	0.5748	0.568	1.7389	1.9553	1.8619	0.9969	1.0031	0.9476	0.723	0.7064	0.7123	0.5173	0.5188	0.5557	1.5033	1.3477	1.3487	1.3365	1.1273	1.2273	1.1399	1.0631
123	283	1301	LC/MS Pos Early	407	2850	147.113	56-87-1	5962	C00047	HMDB00182	LYS	Amino acid	Aspartate family (OAA derived)	lysine	0.6958	0.7136	0.6822	0.6813	2.0373	2.0283	2.1029	0.9852	0.938	0.919	0.9205	0.8951	0.9737	0.9823	0.9602	1.0148	1.0766	1.0608	1.0519	0.9352	0.9505	0.9239	1.3793	1.1732	1.1602	1.1552	1.1778	1.2951	1.2389	1.1448
124	292	1302	LC/MS Pos Early	415	2526	150.058	63-68-3	6137	C00073	HMDB00696	MET	Amino acid	Aspartate family (OAA derived)	methionine	0.6244	0.6684	0.5914	0.6104	2.5447	2.5303	2.798	0.6931	0.6851	0.6782	0.9226	0.8679	1.0089	1.6551	1.6503	1.8924	0.7198	0.7072	0.7262	1.3122	1.2981	1.2151	1.1064	0.9911	0.9654	0.9634	1.2271	1.4069	1.2653	1.2122
125	294	18374	LC/MS Pos Early	100000039	1272	166.053	3226-65-1	158980	C02989	HMDB02005	L-Methionine-sulfoxides	Amino acid	Aspartate family (OAA derived)	methionine sulfoxide	0.6796	0.7043	0.8118	0.6748	2.9203	2.9953	2.7648	1.0425	0.8779	0.8685	1.0746	1.2859	1.0602	2.0155	2.0344	1.8777	1.001	0.999	1.0023	1.6086	1.7498	1.9331	0.4856	0.4657	0.4467	0.4173	0.366	0.3976	0.3832	0.2933
127	302	36752	LC/MS Neg	100001734	1059	187.109	692-04-6	92832	C02727	HMDB00206		Amino acid	Aspartate family (OAA derived)	N6-acetyllysine	0.5445	0.6279	0.5705	0.5725	3.4224	3.7507	3.4313	1.2346	1.2685	1.1075	2.057	1.6319	1.8243	1.0254	0.8625	1.1644	1.0844	0.9746	0.9638	1.1435	1.3654	1.2013	0.5894	0.6638	0.5866	0.629	0.4718	0.4536	0.5431	0.6441
128	301	1498	LC/MS Pos Early	189	2825	189.16	23284-33-5	440120	C03793	HMDB01325		Amino acid	Aspartate family (OAA derived)	N6,N6,N6-trimethyllysine	0.9922	1.0805	1.0078	0.9476	1.5647	1.5116	1.5298	1.0656	0.9891	0.9544	0.8037	0.8222	0.8782	1.0917	1.0552	1.1143	1.3075	1.2897	1.3175	1.4688	1.527	1.5088	0.5418	0.4644	0.445	0.4221	0.4406	0.5074	0.4569	0.3988
130	307	1585	LC/MS Polar	1110	1564.8	130.051	97-69-8	88064	C02847	HMDB00766		Amino acid	Aspartate family (OAA derived)	N-acetylalanine	0.7381	0.815	1.0943	0.7362	2.2857	2.1092	2.3589	0.984	0.9129	0.8658	0.9485	0.8489	1.2658	0.8048	0.7808	0.987	0.7501	1.013	0.8249	1.0881	1.1384	0.9269	2.2659	1.5742	1.4282	1.3036	1.075	0.9625	1.6331	1.0141
131	309	33942	LC/MS Pos Early	100001257	785	175.071	4033-40-3	99715		HMDB06028		Amino acid	Aspartate family (OAA derived)	N-acetylasparagine	0.2694	0.2694	0.2694	0.2694	6.1017	5.5451	5.0262	0.2694	0.2694	0.2694	2.5205	2.47	2.7315	1	1.6383	1.2668	0.5931	0.7349	0.798	0.6661	0.2694	1.0469	0.9596	0.9431	0.9647	0.7281	0.2694	0.2694	0.2694	0.2694
132	310	22185	LC/MS Polar	100000787	3143	174.041	997-55-7;997-55-7	65065	C01042	HMDB00812		Amino acid	Aspartate family (OAA derived)	N-acetylaspartate (NAA)	0.884	0.8847	0.9047	0.9723	1.968	1.9347	1.6574	1.2012	1.1793	1.0277	1.9041	1.728	1.7501	1.6611	1.6118	1.6804	0.7709	0.8296	0.8469	1.1484	1.11	1.1845	0.4232	0.3508	0.3741	0.3817	0.1982	0.1802	0.2009	0.2057
134	318	1589	LC/MS Neg	1083	1787	190.054	65-82-7	448580	C02712	HMDB11745		Amino acid	Aspartate family (OAA derived)	N-acetylmethionine	0.9844	1.0685	0.854	1.3748	1.833	2.481	2.0111	0.9301	0.8481	0.9168	1.458	1.1887	1.0156	1.468	1.2499	1.3652	0.698	0.8126	0.5727	0.6812	0.9282	0.7306	1.5174	1.5099	1.5155	1.4367	0.846	0.8909	0.8661	0.9541
136	327	2829	LC/MS Neg	194	1543.8	176.039	4289-98-9	439750	C03145	HMDB01015		Amino acid	Aspartate family (OAA derived)	N-formylmethionine	0.5594	0.5594	0.5594	0.5594	1.7756	2.8739	2.3759	0.5594	0.7139	0.5594	0.5765	0.8222	0.5594	1.1645	1	0.845	0.5594	0.8404	0.5594	1.0513	0.5594	1.1541	0.5594	0.5594	0.5594	0.5594	0.5594	0.5594	0.5594	0.5594
138	368	1444	LC/MS Pos Early	1025	2200	130.086	4043-87-2	849	C00408	HMDB00070		Amino acid	Aspartate family (OAA derived)	pipecolate	0.7103	0.7417	0.6782	0.6795	1.7358	1.7026	1.6756	1.5578	1.3919	1.3701	0.9967	1.0033	1.0766	0.9532	0.9473	1.0096	1.111	1.0833	1.1012	1.3759	1.3783	1.3625	0.1093	0.1001	0.0944	0.0942	0.2409	0.2872	0.2469	0.2322
141	385	1495	LC/MS Pos Early	392	2530	277.139	997-68-2	160556	C00449	HMDB00279	SACCHAROPINE	Amino acid	Aspartate family (OAA derived)	saccharopine	0.2428	0.2428	0.2428	0.2428	0.2428	0.2428	0.2428	0.2428	0.2428	0.2428	0.2428	0.2428	0.2428	0.2428	0.2428	0.2428	0.2428	0.2428	0.2428	0.2428	0.2428	0.2428	0.3782	0.3061	0.2428	0.2585	1.7464	2.1237	1.7613	1.6218
142	386	42382	LC/MS Neg	197	1832.4	383.114	979-92-0	439155	C00021	HMDB00939	ADENOSYL-HOMO-CYS	Amino acid	Aspartate family (OAA derived)	S-adenosylhomocysteine (SAH)	1.0258	1.0307	0.8459	0.9965	4.1782	5.58	4.4183	0.9471	0.6817	0.7322	1.5579	1.4157	1.3059	1.5573	1.2436	1.3272	0.6566	0.8438	0.7127	1.1246	1.3926	0.9353	1.0035	1.0269	0.7819	0.6797	0.9502	0.9208	0.9123	0.8374
144	411	1284	LC/MS Pos Early	564	1514	120.066	72-19-5	6288	C00188	HMDB00167	THR	Amino acid	Aspartate family (OAA derived)	threonine	0.4599	0.498	0.4677	0.4598	3.3827	3.3413	3.3299	0.8906	0.8621	0.8373	1.4333	1.4408	1.5115	1.5362	1.527	1.5571	0.9912	1.0088	0.9859	0.8837	0.8882	0.8885	1.0094	0.875	0.8529	0.8442	1.5413	1.7546	1.5942	1.4777
149	123	43231	LC/MS Neg	100004499	964.5	142.051	34622-39-4	3014237				Amino acid	Aspartate family (OAA derived)	6-oxopiperidine-2-carboxylate	0.7692	0.8185	0.9104	1.1649	1.3654	1.7535	1.6435	1.0324	0.9943	0.9402	1.0057	0.8922	0.8917	1.9168	1.5835	1.7972	0.8766	1.4147	0.9252	1.3288	1.4172	1.1014	0.2947	0.2563	0.2563	0.2563	0.3745	0.2563	0.2563	0.2662
160	393	38127	LC/MS Pos Early	100002183	2584	164.074	3493-12-07	458	C05319		CPD-397	Amino acid	Aspartate family (OAA derived)	S-methylmethionine	0.6467	0.7003	0.6297	0.5831	5.2347	5.233	4.7227	0.9087	0.668	0.6865	1.5981	1.7276	1.9289	4.992	4.6861	4.9318	0.7221	0.6437	0.6811	0.9819	1.1126	1.0629	0.8989	0.7884	0.7535	0.729	1.0623	1.3819	1.1189	1.0181
161	293	44878	LC/MS Pos Early	100004635	1250	182.048	820-10-0	69961				Amino acid	Aspartate family (OAA derived)	methionine sulfone	1.4282	1.4783	1.6984	1.4833	1.3912	1.4754	1.5889	0.8652	0.7341	0.7311	0.8704	0.7522	0.8283	1.5236	1.5537	1.6242	1.0055	0.9744	1.0115	1.6843	1.9052	1.812	0.5784	0.5645	0.5639	0.532	0.8751	0.9945	0.9121	0.7513
168	100	54723	LC/MS Polar	100009325	4135	189.04	923-42-2	222467				Amino acid	Aspartate family (OAA derived)	3-carboxyadipate	0.7563	0.839	1.1803	1.0615	1.2461	1.1474	1.0576	1.189	0.9382	1.1596	0.3899	0.4177	0.6022	2.7286	2.7913	2.5849	1.0386	1.1422	0.9614	1.5245	2.3019	2.48	0.8651	0.8619	0.7321	0.7264	0.3696	0.4336	0.4536	0.258
171	255	15716	LC/MS Pos Early	100000263	2040	157.061	14403-45-3	440129	C05568	HMDB02320		Amino acid	Glutamate family (alpha-ketoglutarate derived)	imidazole lactate	0.9881	1.0688	1.0119	0.9587	0.1766	0.1711	0.1455	1.4802	1.0371	1.0758	0.1691	0.1935	0.1946	1.1946	1.2424	1.1181	5.3191	4.9399	5.237	0.743	0.7884	0.8229	0.1455	0.1455	0.1455	0.1455	0.1455	0.1455	0.1455	0.1455
173	32	32350	LC/MS Pos Early	100001208	2064	141.066	2625-49-2	75810	C05828	HMDB02820		Amino acid	Glutamate family (alpha-ketoglutarate derived)	1-methylimidazoleacetate	0.5615	1.293	1.1605	1	0.5836	0.7171	0.4314	0.2711	0.2711	0.2711	0.4509	0.2711	0.5182	3.1624	3.2993	3.0499	1.0562	1.0579	0.942	1.0511	1.173	1.0366	0.2711	0.2711	0.2711	0.2711	0.2711	0.528	0.4005	0.2711
176	111	15677	LC/MS Pos Early	100000042	2670	170.092	368-16-1	64969	C01152	HMDB00479		Amino acid	Glutamate family (alpha-ketoglutarate derived)	3-methylhistidine	1.1061	1.2418	1.2037	1.0005	1.2629	1.2845	1.0977	1.0113	0.7799	0.763	0.8798	1.1053	0.9851	4.0244	4.0015	4.1963	0.9995	0.8998	0.9816	1.3047	1.3385	1.5531	0.3089	0.2966	0.2793	0.2703	0.6165	0.7937	0.6852	0.4323
177	113	1558	LC/MS Pos Early	1113	1350	146.081	3025-96-5	18189	C02946	HMDB03681		Amino acid	Glutamate family (alpha-ketoglutarate derived)	4-acetamidobutanoate	0.9534	1.0466	1.1304	0.9481	1.6781	1.5837	1.2109	1.1479	0.8243	0.8017	0.7606	0.8532	0.7056	1.4769	1.3925	1.1827	1.2874	1.311	1.3081	1.3574	1.4392	1.5874	0.2199	0.2205	0.1909	0.1453	0.0587	0.0502	0.0511	0.0363
181	120	18319	LC/MS Pos Early	100000454	2220	118.086	660-88-8	138	C00431	HMDB03355		Amino acid	Glutamate family (alpha-ketoglutarate derived)	5-aminovalerate	1.4502	0.8658	0.9838	1	4.2187	4.7604	4.1744	0.6805	1.1489	0.6662	1.2704	1.5318	0.9679	0.6168	0.8493	0.9806	2.452	2.5941	0.6168	0.7692	0.7165	1.0883	0.6168	0.6168	0.6168	0.6168	0.6168	0.6168	0.6168	0.6168
182	151	1638	LC/MS Pos Early	231	2825	175.119	1119-34-2	232	C00062	HMDB00517	ARG	Amino acid	Glutamate family (alpha-ketoglutarate derived)	arginine	0.5226	0.5407	0.5236	0.522	3.7804	3.7173	3.7442	1.0574	1.0169	0.9846	2.2641	2.2206	2.3189	1.0125	1.0046	1.0213	0.9992	1.0003	0.9997	0.769	0.7751	0.7697	0.8469	0.7649	0.7465	0.7624	1.0116	1.1161	1.0529	0.9799
183	152	15497	LC/MS Pos Early	232	2745	291.13	156637-58-0	16950;828	C03406	HMDB00052	L-ARGININO-SUCCINATE	Amino acid	Glutamate family (alpha-ketoglutarate derived)	argininosuccinate	0.6462	0.6939	0.6197	0.5509	6.3164	5.9919	6.1076	1.4216	1.2851	1.1715	2.2377	2.3864	2.4384	1.0532	1.0551	1.0936	1.1478	1.0723	1.0776	0.8296	0.848	0.9468	0.2207	0.2019	0.1988	0.1881	0.1292	0.1537	0.1374	0.1223
184	165	40007	LC/MS Pos Early	100003260	2085	176.092	4386-03-02	2572		HMDB02201		Amino acid	Glutamate family (alpha-ketoglutarate derived)	carboxyethyl-GABA	1.1823	1.3098	1.1931	1.1249	0.9732	0.9921	0.9301	1.0412	0.8018	0.8338	0.8943	0.9535	1.0079	2.0139	1.9988	1.9343	1.2456	1.1765	1.1659	1.0345	1.0846	1.1102	0.2636	0.2099	0.1917	0.1835	0.1041	0.1709	0.1521	0.1351
185	172	2132	LC/MS Pos Early	391	1520	176.103	372-75-8	9750	C00327	HMDB00904	L-CITRULLINE	Amino acid	Glutamate family (alpha-ketoglutarate derived)	citrulline	0.5885	0.6097	0.5386	0.5892	4.2418	4.1829	4.3323	1.1693	1.2157	1.2925	3.4678	3.3768	3.6659	3.1395	3.2461	3.4728	1.605	1.6176	1.6181	0.7966	0.8307	0.7551	0.4692	0.427	0.4243	0.4238	0.2349	0.2748	0.2429	0.259
187	187	36808	LC/MS Pos Early	100001810	2850	203.15	102783-24-4	123831	C03626	HMDB01539		Amino acid	Glutamate family (alpha-ketoglutarate derived)	dimethylarginine (SDMA + ADMA)	0.8138	0.8686	0.8109	0.7696	1.3264	1.3226	1.2752	1.0212	0.9788	0.9689	0.751	0.7663	0.8088	0.9257	0.8671	0.8682	0.9582	0.874	0.9052	1.1488	1.143	1.1759	3.0751	2.6864	2.6689	2.5766	2.9809	3.3901	3.1292	2.8251
189	205	1416	LC/MS Pos Early	141	2048	104.071	56-12-2	119	C00334	HMDB00112	4-AMINO-BUTYRATE	Amino acid	Glutamate family (alpha-ketoglutarate derived)	gamma-aminobutyrate (GABA)	0.9185	0.969	0.9172	0.9321	1.8456	1.8365	1.8726	0.9744	0.9293	0.9286	1.2028	1.2002	1.2504	1.3339	1.3782	1.3778	1.0345	1.0256	1.0422	1.1648	1.2137	1.1594	0.6216	0.574	0.5631	0.5636	0.4636	0.5259	0.4754	0.4588
190	227	57	LC/MS Pos Early	561	1500	148.06	56-86-0	611	C00025	HMDB00148	GLT	Amino acid	Glutamate family (alpha-ketoglutarate derived)	glutamate	1.0288	1.0556	1.0119	0.9881	3.2713	3.1883	3.1664	0.934	0.9036	0.882	1.1623	1.1636	1.2073	2.1083	2.0534	2.1055	0.8543	0.8493	0.8535	1.3751	1.4018	1.403	0.2848	0.2632	0.251	0.2519	0.3456	0.3812	0.3585	0.3293
191	228	33487	LC/MS Pos Early	100001103	2170	162.076	1499-55-4	68662				Amino acid	Glutamate family (alpha-ketoglutarate derived)	glutamate, gamma-methyl ester	1.3414	1.3233	1.302	1.1664	1.5064	1.6528	1.6508	1.0285	1.1234	0.9673	0.8831	0.8294	0.8102	0.9988	1.0023	0.8434	1.4253	0.8133	0.8832	1.0095	1.0524	1.141	0.6993	1.0012	0.6722	0.4821	0.3473	0.477	0.3402	0.3833
192	229	53	LC/MS Pos Early	563	1291	147.076	56-85-9	5961	C00064	HMDB00641	GLN	Amino acid	Glutamate family (alpha-ketoglutarate derived)	glutamine	0.453	0.4955	0.4552	0.4609	9.1174	9.2157	9.5119	0.5773	0.5508	0.523	1.1016	1.1029	1.1582	0.9764	0.9567	1.0236	0.4434	0.4421	0.4408	0.7103	0.7091	0.694	11.3154	10.0319	9.756	9.7621	6.7024	7.5047	6.756	6.2587
193	252	1574	LC/MS Pos Early	354	3035	112.087	51-45-6	774	C00388	HMDB00870		Amino acid	Glutamate family (alpha-ketoglutarate derived)	histamine	0.545	1.1858	0.6492	0.9162	1.5635	0.9921	1.1791	0.9539	0.851	0.8011	0.9265	1.01	0.867	1.5425	1.1646	1.1444	1.5329	1.736	2.0024	0.8452	0.8544	1.0079	0.545	0.545	0.545	0.545	0.545	0.545	0.545	0.545
194	253	59	LC/MS Neg	355	755.9	154.062	5934-29-2	6274	C00135	HMDB00177	HIS	Amino acid	Glutamate family (alpha-ketoglutarate derived)	histidine	0.9349	0.9502	0.9603	0.973	1.7246	1.8002	1.8205	1.0705	1.027	1.0289	1.2844	1.2941	1.2849	1.5313	1.5096	1.5233	0.9082	0.9312	0.9406	1.1718	1.1671	1.1737	0.0245	0.0249	0.0231	0.0225	0.047	0.048	0.0462	0.0425
196	254	22138	LC/MS Pos Early	100000963	1908	190.119	1190-49-4	65072	C02427	HMDB00679		Amino acid	Glutamate family (alpha-ketoglutarate derived)	homocitrulline	0.8968	0.9867	1.1381	0.8713	2.7754	2.5823	1.9917	1.2019	0.7241	0.7596	2.9221	4.2308	3.5535	2.9906	2.825	2.7765	0.6637	0.5743	0.6152	1.5704	1.6981	2.071	1.0133	0.7495	0.6248	0.646	0.5619	0.9118	0.7138	0.5156
197	308	33953	LC/MS Pos Early	100001266	2245	217.13	155-84-0	67427	C02562	HMDB04620		Amino acid	Glutamate family (alpha-ketoglutarate derived)	N-acetylarginine	1.0296	0.9167	1.0212	0.8676	2.0078	2.1208	2.1815	1.3627	1.468	1.2955	1.1759	1.197	1.4072	0.8156	0.7797	0.7001	0.691	0.7735	0.8378	0.8311	0.9788	0.6689	0.6689	0.6689	0.6689	0.6689	0.6689	0.6689	0.6689	0.6689
198	314	15720	LC/MS Polar	100000282	3106	188.056	5817-08-03	70914	C00624	HMDB01138	ACETYL-GLU	Amino acid	Glutamate family (alpha-ketoglutarate derived)	N-acetylglutamate	0.823	0.9025	0.8713	0.8979	7.438	7.2129	5.9557	1.5115	1.3115	1.1392	1.92	2.3894	2.286	1.7239	1.8018	1.6871	0.5669	0.6151	0.5918	1.0975	1.1618	1.2817	0.0367	0.0336	0.0317	0.0272	0.0137	0.0148	0.0143	0.012
199	315	33943	LC/MS Pos Early	100001253	845	189.087	2490-97-3	182230	C02716	HMDB06029		Amino acid	Glutamate family (alpha-ketoglutarate derived)	N-acetylglutamine	0.3875	0.3875	0.3875	0.3875	3.9201	4.5585	4.4105	0.4951	0.3875	0.5085	0.839	0.88	0.8036	0.3875	0.4905	0.4489	0.3875	0.3875	0.3875	0.3875	0.3875	0.3875	3.3117	2.6645	2.5304	2.8225	1	1.2716	1.0122	0.9373
200	316	33946	LC/MS Pos Early	100001293	2065	198.087	39145-52-3	75619	C02997	HMDB32055		Amino acid	Glutamate family (alpha-ketoglutarate derived)	N-acetylhistidine	0.7825	0.8982	0.7185	0.7932	1.3689	1.6115	1.7454	1.0484	0.9387	0.918	0.9932	0.9561	0.9415	0.9841	1.0905	1.0183	1.1722	1.0068	1.0619	1.0842	1.1932	0.973	0.7185	0.7185	0.7185	0.7185	0.7185	0.7185	0.7185	0.7185
201	324	32984	LC/MS Pos Early	100000285	2000	175.108	6205-08-09	439232	C00437	HMDB03357	N-ALPHA-ACETYLORNITHINE	Amino acid	Glutamate family (alpha-ketoglutarate derived)	N-alpha-acetylornithine	1.1714	1.261	1.0876	1.0946	1.9313	1.9591	2.0983	2.6139	2.3716	2.4056	1.0895	0.9748	1.1803	1.0462	1.0252	1.2351	0.8203	0.7341	0.8331	0.8647	0.9083	0.7752	0.113	0.1349	0.0816	0.0956	0.0661	0.1055	0.0444	0.1185
202	320	34387	LC/MS Pos Early	100001334	1695	158.081	1074-79-9	322640				Amino acid	Glutamate family (alpha-ketoglutarate derived)	N-acetylproline	1.435	1.5381	1.3954	1.4276	1.8141	1.7136	1.7242	0.736	0.726	0.7165	1.027	0.973	1.0519	1.1588	1.1185	1.2204	0.5373	0.5228	0.5314	1.0592	1.159	1.1307	0.5026	0.4565	0.4239	0.4404	0.4321	0.4963	0.4204	0.4186
203	347	1493	LC/MS Pos Early	444	2800	133.097	3184-13-2	6262	C00077	HMDB03374	L-ORNITHINE	Amino acid	Glutamate family (alpha-ketoglutarate derived)	ornithine	0.9768	1.1035	0.9913	0.9418	3.5489	3.7078	3.4737	1.8594	1.6462	1.6736	1.4403	1.4568	1.5271	0.7043	0.711	0.6939	0.5807	0.5364	0.572	0.5075	0.4989	0.5111	1.0087	0.8412	0.8881	0.8495	1.8746	2.2507	1.9061	1.7592
205	369	1898	LC/MS Pos Early	480	1603	116.071	147-85-3	145742	C00148	HMDB00162	PRO	Amino acid	Glutamate family (alpha-ketoglutarate derived)	proline	0.9287	0.9541	0.8729	0.9264	2.7751	2.7305	2.7693	2.0731	2.0678	2.0306	1.0098	0.9794	1.0444	0.9471	0.9471	0.9902	0.8866	0.8895	0.8818	2.8709	2.9188	2.8796	0.9845	0.8437	0.8202	0.8143	1.0726	1.1766	1.1232	1.1214
206	377	46225	LC/MS Pos Early	100001540	1900	129.066	2353-44-8	134508				Amino acid	Glutamate family (alpha-ketoglutarate derived)	pyroglutamine*	1.0331	1.1293	0.8677	1.0614	1.2297	1.286	1.6801	0.5945	0.7069	0.7601	1.8359	1.2889	1.7769	2.5593	2.613	3.8489	0.948	0.8271	1.0281	1.3163	1.2727	0.9719	0.0714	0.0801	0.0649	0.0677	0.0476	0.0833	0.0655	0.0981
208	399	34384	LC/MS Pos Early	100001296	1440	144.102	4136-37-2	115244	C10172	HMDB04827		Amino acid	Glutamate family (alpha-ketoglutarate derived)	stachydrine	0.7934	0.8466	0.7807	0.7976	0.7775	0.786	0.7861	1.278	1.2568	1.199	1.1534	1.174	1.205	6.4688	6.4359	6.3569	4.5835	4.4215	4.5352	2.1167	2.2354	2.1887	0.0514	0.0465	0.0439	0.0445	0.089	0.095	0.0844	0.1013
210	414	32306	LC/MS Pos Early	1001	1064	132.066	51-35-4	5810	C01157	HMDB00725	Protein-hydroxyprolines	Amino acid	Glutamate family (alpha-ketoglutarate derived)	trans-4-hydroxyproline	0.9884	1.0116	1.0382	1.0154	1.6078	1.4601	1.8704	1.2266	1.2476	1.2485	1.6409	1.5928	1.5823	0.5224	0.5423	0.6267	0.9001	0.9197	0.8726	1.415	1.527	1.8308	0.9523	0.7866	0.7717	0.7601	0.4924	0.5273	0.506	0.2966
211	337	37431	LC/MS Pos Early	100001956	1335	130.086	475-11-6	557				Amino acid	Glutamate family (alpha-ketoglutarate derived)	N-methylproline	0.7665	0.9008	0.6384	0.8081	1.36	1.4739	1.7979	0.9444	1.0556	1.0798	0.872	0.7624	0.8198	1.8318	1.7451	2.2117	0.6621	0.7134	0.6559	1.5017	1.564	1.197	0.6384	0.6384	0.6384	0.6384	0.6384	0.6384	0.6384	0.6384
213	415	607	LC/MS Pos Early	537	2285	139.05	104-98-3	736715	C00785	HMDB00301		Amino acid	Glutamate family (alpha-ketoglutarate derived)	trans-urocanate	0.4969	0.4969	0.4969	0.4969	0.4969	0.4969	0.4969	0.4969	0.4969	0.4969	0.4969	0.4969	0.4969	0.4969	0.4969	0.4969	0.4969	0.4969	0.4969	0.4969	0.4969	0.4969	0.5713	0.5559	0.5756	0.4969	1.4584	1.8456	1.5133	1.4244
214	336	39577	LC/MS Pos Early	100003152	2109	118.086	1119-48-8	1550042;70703				Amino acid	Glutamate family (alpha-ketoglutarate derived)	N-methyl-GABA	0.975	1.0321	0.9784	0.9665	0.915	0.925	0.9069	1.2682	1.2289	1.1851	0.9819	1.0181	1.0221	2.3055	2.2884	2.4553	1.1813	1.1629	1.1915	1.3896	1.3906	1.4218	0.0357	0.0309	0.0308	0.0304	0.0542	0.0639	0.0598	0.0539
218	256	40730	LC/MS Pos Early	100003434	2263	141.066	1074-59-5	70630		HMDB02271		Amino acid	Glutamate family (alpha-ketoglutarate derived)	imidazole propionate	0.1884	0.1884	0.1884	0.3183	0.1884	0.1884	0.1884	0.1884	0.4047	0.2935	0.2725	0.1884	0.1884	0.9789	1.0211	1.4243	0.1884	0.1884	0.2477	0.7845	0.7152	0.4411	2.4223	2.1269	1.9961	1.9002	1.4234	2.0785	1.5922	1.3553
219	169	40410	LC/MS Pos Early	100003425	2406	139.05	7699-35-6	1549103				Amino acid	Glutamate family (alpha-ketoglutarate derived)	cis-urocanate	0.7617	0.7617	0.7617	0.7617	0.7617	0.7617	0.7617	0.7617	0.7617	0.7617	0.7617	0.7617	0.7617	0.7617	0.7617	0.7617	0.7617	0.7617	0.7617	0.7617	0.7617	0.7617	0.8077	0.7617	0.8288	0.7663	1.3245	1.637	1.3424	1.1712
220	31	30460	LC/MS Pos Early	100001051	2755	170.092	332-80-9	92105	C01152	HMDB00001		Amino acid	Glutamate family (alpha-ketoglutarate derived)	1-methylhistidine	1.0115	1.0587	1.5801	1.0373	1.4977	1.4231	0.8367	1.5717	0.8877	0.9407	0.4762	0.8722	0.5882	2.4915	2.6297	1.5692	1.0261	0.9885	1.021	1.3676	1.4953	2.1716	0.1374	0.1325	0.135	0.1503	0.478	0.5175	0.4399	0.5214
224	326	43249	LC/MS Pos Early	100004523	1877	175.108		9920500				Amino acid	Glutamate family (alpha-ketoglutarate derived)	N-delta-acetylornithine	1.0242	1.0705	1.0135	0.9865	1.202	1.223	1.231	0.7792	0.6581	0.6889	1.0144	1.0779	1.1196	2.0336	2.0598	2.1285	0.9045	0.8249	0.8914	1.3087	1.3848	1.2591	0.3834	0.3404	0.3035	0.2891	0.5253	0.7458	0.6204	0.5453
227	306	43255	LC/MS Pos Early	100004299	2100	212.103						Amino acid	Glutamate family (alpha-ketoglutarate derived)	N-acetyl-1-methylhistidine*	1.4514	1.6512	1.6761	1.456	0.8553	0.8361	0.7746	1.4192	1.0743	1.1475	0.3516	0.4006	0.411	2.5584	2.5241	2.4053	0.9342	0.9805	1.0195	1.3694	1.3818	1.5764	0.043	0.0386	0.0317	0.0583	0.0837	0.0317	0.0818	0.0317
228	338	43586	LC/MS Pos Early	100004488	2845	189.135	53308-83-1	132862	C03884	HMDB29416		Amino acid	Glutamate family (alpha-ketoglutarate derived)	N-monomethylarginine	0.4807	0.5104	0.4563	0.4789	3.3515	3.4056	3.3128	0.9807	0.9668	0.934	1.609	1.6308	1.7286	2.3301	2.3927	2.4394	0.9111	0.8418	0.8533	1.2067	1.2474	1.2788	0.6917	0.6174	0.6159	0.5971	1.0193	1.2092	1.1194	0.9605
229	114	15681	LC/MS Pos Early	100000096	2320	146.092	463-003;463-00-3	500	C01035	HMDB03464		Amino acid	Glutamate family (alpha-ketoglutarate derived)	4-guanidinobutanoate	0.9928	1.1629	0.9971	1.0066	0.9466	1.0029	0.9349	1.3692	1.2511	1.1957	0.7093	0.7581	0.7626	1.4638	1.4687	1.421	1.6792	1.6331	1.6906	1.0944	1.1923	1.0868	0.0377	0.0388	0.0327	0.0291	0.023	0.0309	0.0247	0.0224
231	118	32349	LC/MS Pos Early	100001207	2055	127.05	645-65-8	96215	C02835	HMDB02024		Amino acid	Glutamate family (alpha-ketoglutarate derived)	4-imidazoleacetate	1.2139	1.3396	1.0895	1.1946	0.7427	0.8492	0.964	1.7608	1.6887	1.6713	0.5605	0.5985	0.5468	0.9751	1.0249	1.1318	1.6114	1.5083	1.642	1.1995	1.3414	1.083	0.0137	0.019	0.0163	0.02	0.0142	0.0126	0.0195	0.0164
237	244	43802	LC/MS Pos Early	344	1937	118.061	352-97-6	763	C00581	HMDB00128		Amino acid	Glutamate family (alpha-ketoglutarate derived)	guanidinoacetate	0.7584	0.754	0.7334	0.7113	0.5913	0.574	0.5758	1.0367	1.0428	1	0.7798	0.7009	0.8085	7.6181	7.8979	7.9668	1.25	1.1513	1.1809	1.8861	2.0019	2.028	0.1171	0.1171	0.1171	0.1171	0.1171	0.1171	0.1171	0.1171
242	158	35101	LC/MS Pos Early	100001411	2145	132.077	353-09-3	67701	C03065	HMDB13222		Amino acid	Glutamate family (alpha-ketoglutarate derived)	beta-guanidinopropanoate	0.8989	0.9664	0.8179	0.8903	0.9626	0.9605	1.1796	1.1071	1.135	1.1101	0.91	0.8048	0.9634	1.0677	1.0336	1.2839	1.8933	1.7715	1.8285	1.748	1.7774	1.5384	0.0116	0.0116	0.0116	0.0116	0.0228	0.0188	0.0206	0.0116
247	96	55072	LC/MS Pos Early	100002784	1760	174.087	3715-10-04	558	C05935,C03771	HMDB04225		Amino acid	Glutamate family (alpha-ketoglutarate derived)	2-oxoarginine*	1.2889	1.2746	1.4824	1.1239	0.7193	0.7406	0.6047	2.4237	1.5635	1.6499	0.2268	0.2924	0.3186	1.2585	1.3164	1.012	2.2829	2.092	2.3763	0.988	1.1882	1.4305	0.1542	0.1149	0.1028	0.0912	0.0203	0.039	0.0301	0.0249
249	268	1125	LC/MS Pos Early	376	2800	132.102	73-32-5	6306	C00407	HMDB00172	ILE	Amino acid	Branched Chain Amino Acids (OAA derived)	isoleucine	0.4748	0.4935	0.4767	0.4725	2.8933	2.8071	2.9198	1.1075	1.0502	0.9979	0.6284	0.5969	0.6438	1.4417	1.421	1.4851	2.1591	2.1335	2.1852	0.6007	0.6188	0.6336	0.4916	0.454	0.429	0.4219	1.039	1.1297	1.0687	1.0021
253	142	46552	LC/MS Pos Early	100005840	2775	132.102		6950182;99288				Amino acid	Branched Chain Amino Acids (OAA derived)	allo-isoleucine	1.1277	1.3238	1.0721	1.053	1.1243	1.281	1.238	0.6978	0.8355	0.9076	0.4173	0.5418	0.5911	2.4212	2.5107	2.556	1.0009	1.1246	0.9885	0.9991	1.0725	0.9048	0.1564	0.1564	0.1564	0.1564	0.1564	0.1581	0.1679	0.2001
263	79	38276	LC/MS Polar	100002417	1050	133.051	1756-18-9	677	C04039	HMDB12141	DIOH-ISOVALERATE	Amino acid	Branched Chain Amino Acids (pyruvate derived)	2,3-dihydroxyisovalerate	1.3612	1.5661	1.5303	1.5345	2.8088	2.6909	2.8352	3.0293	2.9664	2.5793	1.3923	1.2175	1.3827	0.8396	0.7754	0.8801	0.7383	0.8272	0.8057	1.0762	1.0724	0.9276	0.3216	0.3036	0.2664	0.2482	0.0897	0.0841	0.0854	0.0847
266	84	36746	LC/MS Neg	100001541	1800	131.071	488-15-3	164623		HMDB00317		Amino acid	Branched Chain Amino Acids (pyruvate derived)	2-hydroxy-3-methylvalerate	0.6372	0.6372	0.6372	0.9063	1.2465	1.4555	1.6487	0.6372	0.6372	0.6372	0.6372	0.6372	0.6372	1.0928	0.6618	1.2713	0.7697	1.5492	0.745	0.6372	1	0.6657	0.6372	0.6372	0.6372	0.6372	0.6372	0.6372	0.6372	0.6372
269	108	44526	LC/MS Polar	100000936	911	115.04	3715-29-5	49	C00141	HMDB00019	2-KETO-ISOVALERATE	Amino acid	Branched Chain Amino Acids (pyruvate derived)	3-methyl-2-oxobutyrate	0.8826	0.9138	0.9765	0.9594	6.7542	6.4339	7.1229	2.037	1.9015	1.8991	1.5435	1.3378	1.5541	1.346	1.434	1.3867	0.8487	0.9586	0.9616	1.0826	1.0235	1.1422	0.1374	0.1125	0.1086	0.0858	0.1199	0.1415	0.1246	0.1414
270	109	15676	LC/MS Neg	100000036	2064.2	129.056	1460-34-0;51829-07-3	47	C00671	HMDB03736	2-KETO-3-METHYL-VALERATE	Amino acid	Branched Chain Amino Acids (pyruvate derived)	3-methyl-2-oxovalerate	0.8021	0.7991	0.8379	0.9242	6.9977	9.1178	7.2663	1.5472	1.3816	1.4672	0.7707	0.7932	0.6628	2.7918	2.4586	2.3666	2.6673	3.5975	2.5107	1.1319	1.4376	1.0758	0.3315	0.2915	0.2344	0.2222	0.2514	0.2561	0.2443	0.2174
271	119	22116	LC/MS Neg	100000551	2170	129.056	816-66-0	70	C00233	HMDB00695	2K-4CH3-PENTANOATE&redirect=T	Amino acid	Branched Chain Amino Acids (pyruvate derived)	4-methyl-2-oxopentanoate	1.0116	0.9286	0.9884	1.1022	4.0016	5.1825	4.9253	1.0461	0.7981	0.8012	0.7944	0.7106	0.6754	2.6874	2.402	2.3509	1.0595	1.3116	1.1062	1.5956	1.8974	1.5574	0.7851	0.5815	0.5037	0.6047	0.3336	0.3496	0.3627	0.3327
275	144	46537	LC/MS Polar	100001300	1052	117.056	600-37-3	99823		HMDB00407		Amino acid	Branched Chain Amino Acids (pyruvate derived)	alpha-hydroxyisovalerate	0.729	1.5055	1.1365	1.3758	1.9804	2.4118	1.5211	1.5823	1.3389	0.9931	1.032	0.8387	0.5751	0.6776	0.8002	0.876	1.0069	1.3681	1.4187	1.7246	1.7112	1.3891	0.5351	0.645	0.7954	0.896	0.5067	0.3897	0.3997	0.694
276	159	12129	LC/MS Polar	1442	1149.8	117.056	625-08-1	69362		HMDB00754		Amino acid	Branched Chain Amino Acids (pyruvate derived)	beta-hydroxyisovalerate	1.4151	1.6539	1.585	1.6572	1.7626	2.1153	1.9242	0.934	1.2092	0.9406	0.8846	0.916	1.1099	0.8204	0.9092	1.0276	1.1189	1.1783	0.9724	1.6778	1.6517	1.2917	0.6482	0.5188	0.5773	0.628	0.5028	0.3778	0.5153	0.5089
277	272	60	LC/MS Pos Early	397	2864	132.102	61-90-5	6106	C00123	HMDB00687	LEU	Amino acid	Branched Chain Amino Acids (pyruvate derived)	leucine	0.7098	0.7274	0.7022	0.6905	2.8111	2.7976	2.8035	0.9313	0.9071	0.877	0.8095	0.804	0.8248	1.5442	1.5108	1.5763	1.2065	1.2237	1.2512	0.9717	1.0137	1.0429	0.9863	0.8732	0.8381	0.831	1.5213	1.7471	1.5874	1.4617
280	296	15745	LC/MS Polar	2051	2800	131.035	498-21-5	10349		HMDB01844	CPD-2461	Amino acid	Branched Chain Amino Acids (pyruvate derived)	methylsuccinate	0.9409	1.0227	1.1147	0.9773	7.6279	8.2143	6.4732	1.1477	0.8664	0.7282	1.4092	1.5654	1.4829	1.7903	1.7127	1.592	0.9626	0.9599	0.9766	1.0572	1.0724	1.2382	0.3235	0.3062	0.3143	0.2856	0.3316	0.3005	0.3419	0.3185
282	317	1587	LC/MS Neg	1082	2400	172.098	1188-21-2	70912	C02710	HMDB11756		Amino acid	Branched Chain Amino Acids (pyruvate derived)	N-acetylleucine	0.5581	0.5581	0.5581	0.5581	2.43	2.8502	2.3589	0.8982	0.7663	0.7401	0.5581	0.5581	0.5581	0.5581	0.7409	0.7997	1.1566	1.9639	1.335	1.0668	0.5581	0.9332	0.5581	0.5581	0.5581	0.5581	0.5581	0.5581	0.5581	0.5581
286	434	1649	LC/MS Pos Early	566	2479	118.086	72-18-4	6287	C00183	HMDB00883	VAL	Amino acid	Branched Chain Amino Acids (pyruvate derived)	valine	0.4085	0.4266	0.421	0.4069	4.7096	4.5769	4.8553	1.1926	1.1836	1.1772	1.058	1.0696	1.1621	1.05	1.0109	1.1084	1.1076	1.1382	1.1231	0.6501	0.6558	0.6187	0.5242	0.4401	0.4083	0.4158	0.7224	0.9891	0.7755	0.7323
287	91	15667	LC/MS Polar	100000409	2605	175.061	3237-44-3	77	C02504	HMDB00402	3-CARBOXY-3-HYDROXY-ISOCAPROATE	Amino acid	Branched Chain Amino Acids (pyruvate derived)	2-isopropylmalate	1.0345	1.0971	1.088	1.0412	3.1163	3.1632	2.9004	1.2832	1.1233	0.9588	1.1591	1.2985	1.2433	2.4702	2.3091	2.3102	0.9372	0.9655	0.9537	0.7582	0.8054	0.7942	0.0059	0.0037	0.0029	0.0031	0.0035	0.0044	0.0035	0.0029
297	110	38667	LC/MS Polar	100002458	2579.6	143.035	5746-90-7	1551553		HMDB00522		Amino acid	Branched Chain Amino Acids (pyruvate derived)	3-methylglutaconate	0.3386	0.3215	1.0062	0.4327	1.8663	1.0397	2.061	1.2114	1.1014	0.921	0.5123	1	0.4544	1.3993	1.64	1.7086	0.3215	0.3215	0.3215	0.6084	0.5947	0.413	0.3215	0.3215	0.3215	0.3215	0.3215	0.3215	0.3215	0.3215
305	121	1419	LC/MS Pos Early	212	2752	298.097	2457-80-9	439176	C00170	HMDB01173	5-METHYLTHIOADENOSINE	Amino acid	Amines and polyamines	5-methylthioadenosine (MTA)	1.4056	1.4913	1.5531	1.6463	2.6929	2.7648	2.3321	1.0676	0.952	0.9968	1.6263	1.8782	1.7686	1.0032	0.9249	0.9496	0.7578	0.7617	0.7012	1.0706	1.0775	1.2355	0.1693	0.1684	0.1736	0.1709	0.1728	0.1889	0.1629	0.1323
306	137	15496	LC/MS Pos Early	100000103	3057	131.129	2482-00-0	199	C00179	HMDB01432	AGMATHINE	Amino acid	Amines and polyamines	agmatine	0.811	0.9008	0.8894	0.8797	4.6474	4.6145	4.5576	2.782	2.7282	2.6832	0.9953	1.0497	1.0841	0.5785	0.5677	0.546	1.0054	1.0151	1.0047	0.9644	0.9858	1.0137	0.0058	0.0058	0.0058	0.0058	0.0058	0.0062	0.0058	0.0058
307	372	1408	LC/MS Pos Early	49	3027	89.1073	110-60-1	1045	C00134	HMDB01414	PUTRESCINE	Amino acid	Amines and polyamines	putrescine	0.2648	0.4759	0.7403	0.6497	6.5642	7.0148	6.5344	0.9775	0.6659	0.8722	3.0052	2.8657	2.2778	1.1512	1.0225	1.1774	0.1611	0.6704	0.9226	1.3508	1.359	1.0608	0.1611	0.1611	0.1611	0.1611	0.1986	0.2114	0.1611	0.1611
308	397	485	LC/MS Pos Early	50	3355	146.165	124-20-9	1102	C00315	HMDB01257	SPERMIDINE	Amino acid	Amines and polyamines	spermidine	0.9956	1.8951	1.8618	1.8815	1.6184	1.5192	1.4875	1.0044	0.8232	0.7804	2.9495	3.4053	3.1641	0.6021	0.4935	0.4615	1.0217	0.9811	1.1418	1.4668	1.3691	1.5831	0.0262	0.0175	0.02	0.0198	0.0582	0.0657	0.0502	0.0333
313	321	37496	LC/MS Pos Early	192	2230	131.118	18233-70-0	122356	C02714	HMDB02064		Amino acid	Amines and polyamines	N-acetylputrescine	0.462	0.7285	0.4404	0.4905	4.3804	3.6835	3.7762	0.8399	0.8011	0.7357	1.6682	1.7461	1.3808	1.0801	1	1.2658	0.9271	0.6527	0.4404	1.5658	0.7209	1.7069	0.4404	0.4404	0.4404	0.4404	0.4404	0.4404	0.4404	0.4404
314	329	43026	LC/MS Pos Early	100004035	1800	304.15	34441-14-0	9882882	C05324			Amino acid	Amines and polyamines	nicotianamine	0.8571	0.7872	1.5388	0.873	1.894	1.9999	1.2352	2.4251	1.3116	1.2716	0.8025	1.654	0.9899	2.4852	2.4513	1.5162	1.0101	0.9137	0.9221	1.2939	1.547	2.4995	0.652	0.5978	0.5222	0.521	0.5376	0.7015	0.604	0.2606
316	298	32356	LC/MS Pos Early	100001214	3095	188.176	66039-56-3	128317				Amino acid	Amines and polyamines	N(4)-acetylspermidine	0.8624	1.025	0.9661	0.975	3.1187	3.0646	3.4138	0.8353	0.7956	0.6109	0.9284	1.2206	1.3149	0.2058	0.2058	0.2058	1.109	0.8434	0.7744	1.2741	1.4758	1.2739	0.2058	0.2058	0.2058	0.2058	0.2058	0.2058	0.2058	0.2058
319	122	1494	LC/MS Neg	1021	738.5	128.035	98-79-3	7405	C01879	HMDB00267	5-OXOPROLINE	Amino acid	Glutathione metabolism	5-oxoproline	0.9654	1.0241	0.9473	1.0353	1.3191	1.2961	1.2678	0.9645	0.9759	0.9174	0.406	0.3972	0.3927	3.4691	3.1935	3.312	0.3563	0.4082	0.4185	2.2004	2.2325	2.2147	0.7524	0.7063	0.7226	0.7092	1.4213	1.5245	1.4592	1.3186
331	207	36738	LC/MS Pos Early	331	1775	277.103	1116-22-9	92865	C05282	HMDB11737		Amino acid	Glutathione metabolism	gamma-glutamylglutamate	1.0985	1.1537	1.2558	1.0202	2.7295	2.7092	2.2939	0.9147	0.6024	0.6961	0.9798	1.2037	1.1059	1.1939	1.2664	1.1129	0.7179	0.6496	0.7096	1.0663	1.2034	1.5005	0.3171	0.2389	0.221	0.2415	0.3012	0.4021	0.3632	0.3039
332	208	2730	LC/MS Pos Early	1140	1430	276.119	10148-81-9	150914	C05283	HMDB11738		Amino acid	Glutathione metabolism	gamma-glutamylglutamine	0.7101	0.8414	0.811	0.8934	15.569	16.8001	16.5584	0.5993	0.5041	0.6213	1.8552	1.7198	1.7288	0.8116	0.869	1.0008	0.6617	0.5709	0.4747	0.8002	0.9992	0.7485	18.3373	17.3443	16.7051	16.8391	12.5487	12.6014	12.1862	12.8704
334	209	18245	LC/MS Pos Early	1235	2740	285.119	37460-15-4	7017195				Amino acid	Glutathione metabolism	gamma-glutamylhistidine	1.1313	1.246	1.1554	1.0832	1.7639	1.668	1.6396	0.9347	0.8268	0.8455	0.9905	1.097	1.0586	1.3508	1.3431	1.3248	0.9895	0.9225	0.965	1.0095	1.0541	1.1027	0.0074	0.0072	0.0071	0.0069	0.0389	0.0496	0.0426	0.0398
335	210	34457	LC/MS Neg	100001485	1635	259.13		14253342		HMDB11170		Amino acid	Glutathione metabolism	gamma-glutamylisoleucine*	0.3465	0.3781	0.3493	0.5123	2.7526	3.6861	3.3796	0.6823	0.513	0.5888	0.355	0.2119	0.2119	1.0439	1.1378	1	1.3573	2.308	1.5909	0.3259	0.3716	0.2792	0.2119	0.2119	0.2119	0.2119	2.5657	2.7148	2.5651	2.4397
336	211	18369	LC/MS Neg	1268	1685	259.13	2566-39-4	151023		HMDB11171		Amino acid	Glutathione metabolism	gamma-glutamylleucine	0.5956	0.8541	0.7577	0.976	4.7566	6.547	5.5383	0.7263	0.8766	0.4959	0.9876	0.7922	0.6747	1.3049	1.1917	1.0936	1.3392	1.3859	1.2522	0.9014	0.8732	0.8379	1.0124	1.1138	0.8206	0.6502	3.0608	3.6056	3.1489	2.8514
338	212	44872	LC/MS Neg	100001313	1268	277.086	17663-87-5	7009567		HMDB29155		Amino acid	Glutathione metabolism	gamma-glutamylmethionine	0.4209	0.5403	0.493	0.5346	3.5623	4.776	3.6005	0.4367	0.3361	0.3361	0.631	0.7202	0.6537	1.1649	0.9114	0.7216	0.4746	0.6278	0.6254	1.1158	1.5592	1.1613	1.0406	1.1018	1.0541	1	2.1171	2.2121	2.1748	2.1853
339	213	33422	LC/MS Neg	100000491	1825	293.114	7432-24-8	111299		HMDB00594		Amino acid	Glutathione metabolism	gamma-glutamylphenylalanine	0.4623	0.6962	0.4955	0.7309	3.2533	3.7291	4.1414	0.6768	0.7	0.4222	0.5976	0.4945	0.5697	10.9362	8.0393	8.7832	0.958	0.9964	1.0207	0.7308	0.8498	0.5078	1.2824	1.0342	1.1425	1.0036	363.382	362.264	350.135	354.413
341	214	33947	LC/MS Neg	100001295	1960	332.125	66471-20-3	3989307		HMDB29160		Amino acid	Glutathione metabolism	gamma-glutamyltryptophan	0.2338	0.2339	0.2036	0.2449	1	1.2333	1.0706	3.544	3.3499	3.123	0.2036	0.2036	0.2036	4.5984	4.1874	4.3759	0.7703	0.8461	0.7984	2.6206	3.0254	2.6948	0.2036	0.2036	0.2036	0.2036	0.2379	0.2783	0.2607	0.2534
342	215	2734	LC/MS Neg	1102	1240	309.109	7432-23-7	94340		HMDB11741		Amino acid	Glutathione metabolism	gamma-glutamyltyrosine	0.1551	0.1551	0.1551	0.1551	0.3554	0.3873	0.4216	0.1551	0.1551	0.1551	0.1551	0.1551	0.1551	1.7993	1.7293	1.5784	0.1551	0.1551	0.1551	0.1551	0.1551	0.1551	0.1908	0.1584	0.1551	0.1627	44.1242	44.4372	42.7981	43.2477
343	216	43829	LC/MS Polar	100001126	2916	245.114	2746-34-1	7015683		HMDB11172		Amino acid	Glutathione metabolism	gamma-glutamylvaline	0.5383	0.5383	0.5383	0.5383	7.0193	6.7769	7.1412	0.6656	0.8009	0.5383	0.5383	0.7953	0.5383	0.7085	0.5383	0.5383	0.5383	0.5383	0.5383	0.5383	0.5383	0.5383	0.5383	0.5383	0.5383	0.5383	0.5997	1.2823	1.1991	1.2223
346	206	55015	LC/MS Pos Early	100010901	2784	276.155		65254				Amino acid	Glutathione metabolism	gamma-glutamyl-alpha-lysine	0.6811	1.0175	0.6022	0.6358	2.7275	2.5667	2.7634	1.1723	0.6545	0.6427	0.9394	0.9349	0.9551	0.775	0.7382	0.9825	1.3405	0.9322	1.2374	1.0923	0.965	0.8412	1.3154	1.4846	1.2325	0.887	1.1324	1.1989	1.2452	1.1318
355	224	48152	LC/MS Polar	572	2342	225.062	50-99-7	79025	C00031	HMDB00122	CPD-3607	Carbohydrate	Glycolysis	glucose	0.8754	0.9361	1.0347	1.018	3.3826	3.3358	3.0717	1.1292	1.0582	1.0231	1.1102	0.9639	1.0812	0.982	1.0569	1.0424	1.1166	1.1723	1.216	0.9714	0.9637	0.9535	0.3072	0.291	0.3022	0.2527	0.9234	0.911	0.9396	0.7589
357	225	31260	LC/MS Polar	291	4537	259.022	103192-55-8	5958	C00668	HMDB01401	ALPHA-GLC-6-P	Carbohydrate	Glycolysis	glucose 6-phosphate	1.2492	1.1342	0.9531	0.991	1.009	0.9641	0.8711	1.3444	1.132	0.9308	0.9691	0.8551	1.2244	1.3856	1.2072	1.5309	2.0795	2.0119	1.8232	2.2889	2.0802	2.0945	0.7735	0.5376	0.6008	0.4956	0.3142	0.3378	0.334	0.1601
358	226	15443	LC/MS Polar	100000257	3233.3	193.035	207300-70-7	444791	C00191	HMDB00127	GLUCURONATE	Carbohydrate	Glycolysis	glucuronate	0.6402	0.7164	0.7035	0.7095	1.3099	0.6793	1.3643	0.9983	1.0375	0.8572	0.8082	0.8602	0.8297	0.6445	0.7001	0.6756	0.9102	1.1122	0.996	1.0017	1.0706	1.1006	7.5835	6.7418	7.0287	6.4344	8.5858	8.6984	8.5319	7.7988
359	265	46896	LC/MS Neg	100002180	551	338.989					FRUCTOSE-16-DIPHOSPHATE	Carbohydrate	Glycolysis	Isobar: fructose 1,6-diphosphate, glucose 1,6-diphosphate, myo-inositol 1,4 or 1,3-diphosphate	0.7861	0.7293	1	1.1079	0.2904	0.5735	1.2556	0.2904	1.4139	1.1556	3.4955	2.5294	3.0398	1.7876	1.4463	1.9138	0.734	0.9972	0.9991	0.4447	0.3665	0.2914	0.2904	0.2904	0.2904	0.2904	0.2904	0.2904	0.2904	0.2904
360	271	527	LC/MS Polar	482	1468.8	89.0244	79-33-4	612	C00186	HMDB00190	L-LACTATE	Carbohydrate	Glycolysis	lactate	0.6869	1.0044	0.7868	1.0508	0.7644	0.627	0.8703	2.7837	1.1393	0.8254	0.6039	0.6276	0.5859	0.9554	0.781	0.7808	0.9956	1.5535	1.3401	1.2279	1.2092	1.2918	1.0378	1.4722	0.9506	0.9018	1.4956	1.679	1.626	1.2868
361	363	597	LC/MS Pos Early	463	585	168.99	10526-80-4	1005	C00074	HMDB00263	PHOSPHO-ENOL-PYRUVATE	Carbohydrate	Glycolysis	phosphoenolpyruvate (PEP)	0.2304	0.2304	0.2304	0.2304	1.1139	1.1521	1.2427	0.2304	0.2304	0.2304	0.2304	0.2304	0.2304	0.6649	0.8101	1	0.36	0.5721	0.3893	1.9253	1.9401	1.9694	0.2304	0.2304	0.2304	0.2304	0.2304	0.2304	0.2304	0.2304
363	378	48990	LC/MS Polar	823	1083	87.0088	127-17-3	1060	C00022	HMDB00243	PYRUVATE	Carbohydrate	Glycolysis	pyruvate	0.7616	0.874	1.0125	1.0651	1.9461	2.0106	2.1905	1.2694	1.2462	0.9568	0.9875	0.8892	0.9672	1.1211	1.1138	1.174	0.9031	1.1891	1.1886	1.5834	1.5282	1.6186	0.6663	0.5696	0.471	0.4726	0.2381	0.2302	0.2252	0.1687
369	128	46173	LC/MS Neg	100001359	580	173.009			C00417	HMDB00072		Carbohydrate	TCA cycle	aconitate [cis or trans]	0.9788	1.0702	1.056	1.0671	1.0212	1.0767	1.0505	0.9538	0.8671	0.8755	0.6884	0.6688	0.6325	1.2664	1.1963	1.0885	1.4535	1.4692	1.5156	1.4953	1.5636	1.4412	0.2188	0.1983	0.1887	0.173	0.1545	0.152	0.1599	0.1495
370	145	528	LC/MS Polar	93	2700	145.014	305-72-6;328-50-7;22202-68-2	51	C00026	HMDB00208	2-ketoglutarate	Carbohydrate	TCA cycle	alpha-ketoglutarate	1.0222	1.0325	1.1076	0.9907	1.2164	1.1819	1.1364	1.2146	1.0266	1.0093	0.5903	0.5831	0.6023	1.3452	1.3761	1.2906	0.7812	0.8267	0.8178	1.3412	1.3982	1.3997	0.2374	0.2059	0.1968	0.1903	0.0426	0.0416	0.0418	0.0307
372	171	1564	LC/MS Neg	1124	582	191.02	77-92-9	311	C00158	HMDB00094	CIT	Carbohydrate	TCA cycle	citrate	0.9142	0.9607	0.9469	0.9599	1.0575	1.057	1.0393	1.2249	1.1653	1.1219	0.8481	0.8347	0.8563	1.0752	1.0647	1.0682	1.3478	1.3154	1.3831	1.2858	1.3084	1.2948	0.2025	0.1818	0.1957	0.187	0.1682	0.178	0.17	0.1691
373	199	1643	LC/MS Polar	330	3084	115.004	100-17-8	444972	C00122	HMDB00134	FUM	Carbohydrate	TCA cycle	fumarate	1.3251	1.4686	1.4131	1.4367	2.9971	2.9616	2.6063	1.2589	1.0035	0.9881	1.2382	1.1725	1.2358	0.9965	0.9701	0.9598	0.8678	0.8994	0.9019	1.2403	1.172	1.2198	0.3578	0.285	0.2533	0.2386	0.2634	0.2681	0.2578	0.211
374	266	12110	LC/MS Pos Early	1206	773	210.061	20226-99-7	1198	C00311	HMDB00193	threo-ds-iso-citrate	Carbohydrate	TCA cycle	isocitrate	1.0854	1.1348	1.004	1.1057	0.805	0.7686	0.8256	1.1158	1.1025	1.0922	0.7739	0.6897	0.8518	1.0892	0.996	1.1004	1.3976	1.3886	1.3631	1.2153	1.2078	1.2103	0.1663	0.1403	0.1303	0.1429	0.1601	0.1907	0.1606	0.1579
375	285	1303	LC/MS Neg	409	615.6	133.014	6915-15-7	525	C00149	HMDB00156	MAL	Carbohydrate	TCA cycle	malate	1.1217	1.1887	1.1452	1.1806	1.3319	1.3299	1.3051	1.242	1.181	1.1681	0.9272	0.9197	0.9317	0.689	0.6751	0.7139	1.0094	0.9906	1.0597	1.0619	1.0704	1.0497	0.1087	0.0972	0.0988	0.0918	0.1015	0.1061	0.0985	0.0948
376	286	20676	LC/MS Polar	100000707	2510	115.004	110-16-7	444266	C01384	HMDB00176	MALEATE	Carbohydrate	TCA cycle	maleate	1.6992	1.7749	1.9059	1.3977	0.9759	1.0386	1.0063	1.2774	1.2151	1.2162	0.7675	0.8845	0.9827	0.8053	0.937	0.9937	1.4681	2.4846	1.3634	1.2814	2.0535	1.9555	0.2183	0.2095	0.1613	0.1537	0.1856	0.2079	0.2041	0.1959
380	405	1437	LC/MS Polar	252	3149	117.019	110-15-6	1110	C00042	HMDB00254	SUC	Carbohydrate	TCA cycle	succinate	0.9573	1.0427	1.1524	1.0895	2.0237	2.1129	1.9524	1.3508	1.2801	1.1626	0.913	0.867	0.8269	1.3268	1.1832	1.1582	0.7841	0.9357	0.8874	1.1529	1.1637	1.2051	0.8505	0.7322	0.7202	0.692	0.4804	0.482	0.4784	0.4274
383	92	52282	LC/MS Neg	100008929	575	205.035						Carbohydrate	TCA cycle	2-methylcitrate/homocitrate	0.8561	0.9198	1.06	1.0568	1.1468	1.2603	1.0868	0.7585	0.6797	0.6949	0.766	0.8476	0.8854	1.4289	1.258	1.4865	1.3127	1.1897	1.1747	1.296	1.246	1.1741	1.0287	0.9077	0.9713	0.9097	0.7684	0.8183	0.7737	0.7298
384	267	54724	LC/MS Polar	100009239	2970	173.009	4702-32-3	98259				Carbohydrate	TCA cycle	isocitric lactone	1.0921	1.1627	1.1749	1.1854	1.0697	1.1116	1.0127	1.9013	1.7678	1.6186	1.3951	1.415	1.3982	0.5155	0.5199	0.526	0.9504	0.9873	0.9458	0.9852	1.0176	1.0469	0.0003	0.0003	0.0003	0.0002	0.0004	0.0003	0.0004	0.0003
385	112	1414	LC/MS Pos Early	132	590	187	80731-10-8	724	C00597	HMDB00807	G3P	Carbohydrate	Calvin cycle and pentose phosphate	3-phosphoglycerate	0.4899	0.539	0.3491	0.5391	1.3835	1.2775	1.3919	0.5046	0.625	0.5595	1.0263	0.7839	0.9737	1.1094	1.2328	1.4689	1.4694	1.4268	1.4677	2.6903	3.2117	2.9618	0.1605	0.1605	0.1605	0.1605	0.2542	0.2963	0.1605	0.2602
392	390	53237	LC/MS Polar	100002619	2255	209.067	3019-74-7	5459879		HMDB03219		Carbohydrate	Calvin cycle and pentose phosphate	sedoheptulose	1.0751	1.2819	1.6052	1.5054	1.199	1.1122	0.9628	1.3128	0.8116	1.06	1.6819	1.5702	1.5086	0.536	1.027	0.973	0.7606	0.7666	0.8275	1.359	1.2564	1.3011	0.7327	0.7384	0.6713	0.5906	0.1507	0.2475	0.2389	0.2513
394	351	20694	LC/MS Neg	100000841	603	88.988	144-62-7	971	C00209	HMDB02329	OXALATE	Carbohydrate	Photorespiration	oxalate (ethanedioate)	1.3097	1.354	1.2875	1.3739	1.0863	1.024	1.0729	0.8621	0.807	0.8923	1.3469	1.2796	1.311	1.0739	1.0114	0.9306	0.9886	0.931	0.9762	1.0234	1.0419	1.0299	0.5863	0.4899	0.5229	0.4996	0.3126	0.3286	0.2939	0.2898
398	231	1572	LC/MS Polar	1052	2070.4	105.019	600-19-1	752	C00258	HMDB00139	GLYCERATE	Carbohydrate	Photorespiration	glycerate	0.9172	1.0203	0.977	1.0097	1.7276	1.8122	1.8265	1.0589	1.0248	0.898	1.0516	1.058	0.9903	0.7396	0.6392	0.7198	1.0332	1.1466	1.068	1.2936	1.4307	1.255	0.3233	0.1827	0.1845	0.2897	0.5434	0.5157	0.2887	0.4343
404	148	575	LC/MS Polar	828	1804.5	195.051	28697-53-2	66308	C00216	HMDB00646	D-ARABINOSE	Carbohydrate	Amino sugar and nucleotide sugar	arabinose	0.7906	0.5788	1.0379	0.8572	1.7679	1.8465	1.6017	0.5865	0.4876	0.9786	0.9709	0.7735	0.884	0.8085	0.6888	1.1514	0.9055	0.3396	1.0214	0.9035	1.1786	0.4705	1.2345	1.3646	1.1363	1.0956	5.1327	4.8551	4.464	4.0972
407	192	20699	LC/MS Polar	100000846	1491	167.056	149-32-6	222285	C00503	HMDB02994	2-C-METHYL-D-ERYTHRITOL-4-PHOSPHATE	Carbohydrate	Amino sugar and nucleotide sugar	erythritol	0.9161	0.7826	0.3477	1.3014	2.0099	2.404	0.6964	0.9776	1	0.5985	1.3446	0.9849	1.0212	0.3477	0.3477	0.3477	0.7906	1.3633	1.4349	0.3477	1.1992	0.3477	0.3477	0.3477	0.3477	0.3477	0.3477	0.3477	0.3477	0.3477
408	193	42420	LC/MS Polar	100001320	2186	135.03	88759-55-1	2781043		HMDB00613		Carbohydrate	Amino sugar and nucleotide sugar	erythronate*	1.0009	1.1668	1.2578	1.078	2.1297	2.1949	2.0547	1.2522	1.3804	1.1074	0.9991	1.0285	1.0405	0.9486	0.9589	1.2216	0.6293	0.6849	0.6625	1.1204	0.7317	1.323	0.1852	0.1563	0.1584	0.1458	0.1834	0.1973	0.195	0.1701
411	223	27681	LC/MS Pos Early	100001009	1091	196.082	3646-68-2	73563	C03752			Carbohydrate	Amino sugar and nucleotide sugar	glucosaminate	0.576	0.576	0.576	0.576	0.576	0.576	0.576	0.576	0.576	0.576	0.576	0.576	0.576	0.576	0.576	0.576	0.576	0.576	0.576	0.576	0.576	0.576	1.1404	1.1005	1.0881	1.0957	0.8787	0.9119	0.8991	0.576
418	311	15741	LC/MS Polar	1212	4052	300.049	31281-59-1	440364	C04256	HMDB01367	N-ACETYL-D-GLUCOSAMINE-1-P	Carbohydrate	Amino sugar and nucleotide sugar	N-acetyl-glucosamine 1-phosphate	0.6696	0.7754	0.7365	0.7808	0.5636	0.5854	0.5651	1.1323	1.1067	1.0259	0.5582	0.6378	0.6255	0.4627	0.4548	0.4279	1.0804	1.1737	1.1584	0.984	0.9661	1.016	2.9013	2.2903	2.3386	2.0933	1.359	1.451	1.3341	1.2365
419	312	15107	LC/MS Polar	1213	4114	300.049	102029-88-9	439219	C00357	HMDB02817	N-ACETYL-D-GLUCOSAMINE-6-P	Carbohydrate	Amino sugar and nucleotide sugar	N-acetylglucosamine 6-phosphate	0.3972	0.3382	0.2939	0.335	1.8573	1.8935	1.8957	0.7046	0.7268	0.5628	0.4742	0.4083	0.4346	0.2277	0.2277	0.3135	1	0.9619	0.9926	1.111	1.0319	1.1759	4.7888	4.1502	4.0378	3.7191	1.4949	1.6927	1.5441	1.5272
423	382	27731	LC/MS Polar	100001007	2425	165.04	5336-08-03	5460677	C01685	HMDB00867		Carbohydrate	Amino sugar and nucleotide sugar	ribonate	0.9975	1.0025	1.388	1.0153	2.066	0.7651	0.7595	2.1696	1.141	1.2516	1.3372	1.434	1.4222	1.4304	1.3634	0.7531	0.7556	0.9211	0.8208	1.6551	1.8312	1.7544	0.7267	0.6335	0.6562	0.5778	0.437	0.45	0.4024	0.3747
424	383	1471	LC/MS Polar	914	1508.2	195.051	50-69-1	5779	C00121	HMDB00283	RIBOSE	Carbohydrate	Amino sugar and nucleotide sugar	ribose	0.8816	1.0486	1.2263	1.119	3.0689	2.7917	2.6121	1.0027	0.9601	0.9973	0.889	0.6151	0.8233	0.4184	0.4344	0.4092	0.626	0.7631	0.7693	0.9368	0.8061	0.7681	3.0381	2.5862	2.216	2.2197	2.3438	2.2043	2.2451	2.0824
428	426	32344	LC/MS Polar	1096	3950	565.048	117756-22-6	8629	C00029	HMDB00286	UDP-GLUCOSE	Carbohydrate	Amino sugar and nucleotide sugar	UDP-glucose	0.9549	0.9961	1.0039	0.9694	0.4485	0.4485	0.4485	0.647	0.665	0.4485	0.4485	0.4485	0.4485	8.9167	8.5161	9.5313	4.2881	4.3118	3.8899	19.4361	19.5144	19.8085	0.4485	0.4485	0.4485	0.4485	0.8613	0.9685	0.8058	0.8748
430	428	35162	LC/MS Polar	1249	3708.7	606.074	91183-98-1	445675	C00043	HMDB00290	UDP-N-ACETYL-D-GLUCOSAMINE	Carbohydrate	Amino sugar and nucleotide sugar	UDP-N-acetylglucosamine	0.6233	0.716	0.5405	0.7128	1.0448	0.9308	0.9762	0.9757	0.8046	0.9214	0.754	0.5917	0.5694	0.8089	0.5895	0.7421	1.0238	1.1714	1.1285	1.0477	1.1241	1.0762	4.0511	3.359	3.5523	3.0239	1.3362	1.5225	1.4458	1.511
433	440	15581	LC/MS Polar	826	1727	195.051	609-06-3	135191	C00181	HMDB00098	XYLOSE	Carbohydrate	Amino sugar and nucleotide sugar	xylose	0.5017	0.887	0.9292	0.5017	2.1249	3.3577	2.1373	1.2105	1.1613	1.4183	1.0628	0.5017	1.3812	0.5017	0.5017	0.5017	0.5017	0.5017	0.5017	0.5017	0.5017	0.5017	0.5017	0.6671	0.5883	0.5017	0.5702	0.7108	0.5017	0.9372
437	425	15860	LC/MS Polar	100000298	4000	565.048	2956-16-3;91183-98-1;137868-52-1	18068	C00052	HMDB00302	UDP-GALACTOSE	Carbohydrate	Amino sugar and nucleotide sugar	UDP-galactose	0.0563	0.0563	0.0563	0.0563	0.0563	0.0563	0.0563	0.0563	0.0563	0.0563	0.0563	0.0563	0.0563	1.0784	0.9216	1.2444	0.3741	0.3248	0.0563	2.0141	2.2283	2.3079	0.0563	0.0563	0.0563	0.0563	0.0563	0.0563	0.0563	0.0644
440	150	48255	LC/MS Polar	100006115	2664.6	165.04						Carbohydrate	Amino sugar and nucleotide sugar	arabonate/xylonate	1.0458	1.135	1.1574	1.0577	0.9729	1.0104	0.8274	1.6804	1.6003	1.3198	0.9648	1.0708	1.0232	1.0681	1.0932	0.9896	1.0747	1.2411	1.1039	0.7957	0.7629	0.8224	0.3013	0.2506	0.2575	0.2347	0.403	0.4349	0.3627	0.3655
442	427	18396	LC/MS Polar	1257	3730	606.074	108320-87-2	439185	C00203	HMDB00304		Carbohydrate	Amino sugar and nucleotide sugar	UDP-N-acetylgalactosamine	0.7882	0.7926	0.9239	0.6895	0.7048	0.7412	0.9117	1.1672	1.0084	0.8128	0.5534	0.7637	0.6651	0.6017	0.7948	0.6605	1.1437	1.0559	1.0995	1.0903	1.034	1.2861	3.4015	2.5895	2.2699	2.5878	1.3418	1.2526	1.2347	0.9916
443	149	48885	LC/MS Polar	100006430	1932.4	151.061						Carbohydrate	Amino sugar and nucleotide sugar	arabitol/xylitol	1.1291	1.0394	1.1785	1.2278	1.0818	1.2382	1.2911	0.9163	0.9917	0.9051	0.844	0.8876	0.8574	1.0089	0.9649	1.0083	1.0419	1.0985	1.0911	1.2429	1.3227	1.3723	0.4018	0.352	0.3661	0.3112	0.3299	0.3774	0.2868	0.2683
445	313	46539	LC/MS Pos Early	100006435	715	222.097						Carbohydrate	Amino sugar and nucleotide sugar	N-acetylglucosamine/N-acetylgalactosamine	0.8624	0.9726	0.8974	0.9467	1.9814	1.9757	1.8383	1.1726	1.2159	1.1012	0.8132	0.8053	0.7975	0.5938	0.6707	0.623	0.9261	0.9089	0.9863	1.1075	1.0947	1.1804	1.7407	1.5524	1.4752	1.4784	1.003	1.0785	0.997	0.9011
446	384	54671	LC/MS Polar	100006122	1400	195.051						Carbohydrate	Amino sugar and nucleotide sugar	ribulose/xylulose	0.8747	1	1.2699	1.1991	1.9447	1.4102	1.8043	1.4708	1.2847	1.22	0.9077	0.6242	0.8019	0.516	0.5195	0.4986	0.9498	1.1227	1.1496	1.252	1.119	1.0751	0.06	0.0766	0.06	0.06	0.108	0.06	0.1149	0.1145
455	166	37112	LC/MS Polar	100001859	3191.2	225.062	643-12-9		C19891	HMDB34220	CPD-8052	Carbohydrate	Inositol metabolism	chiro-inositol	1.9391	1.9851	1.9406	1.9887	0.8406	0.842	0.7866	1.2779	1.3806	1.2174	0.7427	0.7053	0.7741	1.0034	0.9966	1.0087	1.2696	1.4274	1.3671	2.0163	2.0444	1.8673	0.4618	0.4408	0.4435	0.4452	0.2084	0.2199	0.2004	0.1999
456	261	43849	LC/MS Polar	370	4785	259.022	573-35-3;106032-59-1	440194	C04006	HMDB00213	1-L-MYO-INOSITOL-1-P	Carbohydrate	Inositol metabolism	inositol 1-phosphate (I1P)	1.2442	0.9225	0.742	1.1562	1.245	1.1755	2.261	0.7894	1.1591	1.3649	1.0146	0.5628	1.0947	1.4218	1.2328	2.4134	1.2771	1.4134	0.9569	0.8796	0.9854	0.5791	1.0315	0.9269	0.9078	0.6287	0.5759	0.6407	0.5796	0.6163
459	297	1124	LC/MS Polar	363	3506.3	225.062	87-89-8	892	C00137	HMDB00211	MYO-INOSITOL	Carbohydrate	Inositol metabolism	myo-inositol	1.5012	1.6285	1.5487	1.6205	3.1667	3.1788	3.0407	1.4569	1.4655	1.3404	1.55	1.4994	1.5463	0.965	0.957	0.9536	0.8523	0.9069	0.8781	1.001	1.0296	0.999	0.4068	0.3735	0.3731	0.3289	0.2267	0.2414	0.223	0.2092
461	263	38388	LC/MS Neg	100002880	522	578.888		439468	C01284	HMDB03529	CPD-534	Carbohydrate	Inositol metabolism	inositol pentakisphosphate	0.401	0.673	0.6208	1	0.401	0.401	0.401	0.401	0.401	0.401	2.0574	1.0901	1.6359	0.401	0.401	0.401	0.401	0.401	0.401	0.401	0.401	0.401	0.401	0.401	0.401	0.401	0.401	0.401	0.401	0.401
462	262	39575	LC/MS Neg	421	527	658.854	83-86-3	890	C01204	HMDB03502	MI-HEXAKISPHOSPHATE	Carbohydrate	Inositol metabolism	inositol hexakisphosphate	15.1078	22.2764	17.859	30.0627	0.193	0.193	0.193	0.193	0.2673	0.3017	47.0209	24.7712	38.2541	1.5685	1.4323	0.5677	0.193	0.4793	0.3638	0.2092	0.2601	0.1941	0.193	0.193	0.193	0.193	0.193	0.193	0.193	0.193
464	367	37086	LC/MS Polar	100001860	2039.6	239.077	10284-63-6	164619	C03844	HMDB34219	CPD-8046	Carbohydrate	Inositol metabolism	pinitol	1.5588	1.7786	1.809	1.6259	0.7224	0.7935	0.7129	1.62	1.4477	1.3123	1.0175	0.9825	1.0332	0.6654	0.6386	0.6977	1.9065	2.0336	1.9938	1.9981	2.1051	2.1255	0.0878	0.0786	0.081	0.0754	0.0831	0.0731	0.0802	0.0645
468	264	38389	LC/MS Neg	100002881	541	418.955		439455	C01243	HMDB01143	INOSITOL-1-3-4-TRIPHOSPHATE	Carbohydrate	Inositol metabolism	inositol triphosphate	0.4699	0.5878	0.4867	1.0339	0.4699	0.4699	0.4699	0.4699	0.4699	0.4699	2.3474	1	1.4952	0.4699	0.4699	0.4699	0.4699	0.4699	0.4699	0.4699	0.4699	0.4699	0.4699	0.4699	0.4699	0.4699	0.4699	0.4699	0.4699	0.4699
473	19	22012	LC/MS Polar	100000980	3970	549.167	470-69-9	440080	C03661	HMDB11729	1-KESTOTRIOSE	Carbohydrate	Sucrose, glucose,fructose metabolism	1-kestose	0.9709	1.0498	0.9926	1.0112	1.0153	1.0094	1.0074	0.8693	0.8202	0.7531	0.5184	0.5318	0.5268	1.9128	1.7118	1.852	0.802	0.85	0.7966	1.1679	1.2688	1.261	0.5184	0.5184	0.5184	0.5184	0.5184	0.5184	0.5184	0.5184
474	101	43805	LC/MS Polar	100000095	2706.7	237.062	103404-70-2	4636210			KDO	Carbohydrate	Sucrose, glucose,fructose metabolism	3-deoxyoctulosonate	0.8475	0.9012	0.9296	0.9563	1.4317	1.4252	1.396	1.0982	1.1014	0.9373	0.5751	0.5751	0.5751	1.0827	1.033	1.0647	1	1.2729	1.0806	1.3715	1.4507	1.4559	0.8288	0.6841	0.7199	0.6317	0.6016	0.6786	0.6146	0.5751
478	194	37427	LC/MS Polar	100001986	1133	165.04	533-50-6	5460032	C02045	HMDB06293		Carbohydrate	Sucrose, glucose,fructose metabolism	erythrulose	1.1681	1.5465	1.7095	1.7595	2.8603	2.5508	2.6833	0.9502	1.0697	1.5228	1.3737	0.9553	0.8988	1	0.9409	0.8539	0.8399	1.3456	1.1266	1.3165	1.1573	0.8281	0.2202	0.195	0.1696	0.2426	0.0286	0.0805	0.0541	0.0286
479	198	48195	LC/MS Polar	878	2022.2	225.062	57-48-7	5984	C00095	HMDB00660	Fructose	Carbohydrate	Sucrose, glucose,fructose metabolism	fructose	0.8828	0.933	0.9782	0.9384	4.2073	4.2229	3.832	1.3164	1.2199	1.0984	1.2043	1.0795	1.2166	1.0247	1.0218	1.0902	1.0449	1.1183	1.0958	0.5532	0.5595	0.5446	0.244	0.2417	0.2343	0.2223	0.743	0.719	0.7615	0.6265
481	201	34706	LC/MS Polar	100000908	4656	341.109	16908-86-4	439451	C01235	HMDB05826	CPD-458	Carbohydrate	Sucrose, glucose,fructose metabolism	galactinol	0.2215	0.4019	0.2096	0.2791	0.2096	0.2096	0.2168	1.1362	1	0.9649	0.2096	0.3139	0.2268	1.1798	1.3907	0.6043	0.9581	1.0362	0.8914	0.8361	1.0513	0.8134	2.8729	2.4567	2.4226	2.2058	7.4393	8.5347	7.4483	6.8961
483	202	27719	LC/MS Polar	100001026	3085	195.051	299-28-5	128869	C00880	HMDB00565		Carbohydrate	Sucrose, glucose,fructose metabolism	galactonate	0.8503	0.9165	0.9486	0.9122	2.2497	1.7046	2.247	1.5218	1.5131	1.2653	1.0494	0.9699	1.0314	1.5984	1.2178	1.1634	1.1184	1.2899	1.205	0.9079	0.94	1.0301	0.2903	0.2159	0.2222	0.2058	0.2793	0.3012	0.2715	0.2681
485	203	15706	LC/MS Polar	100000300	4552	259.022	19046-60-7	123912	C00446	HMDB00645	CPDQT-4	Carbohydrate	Sucrose, glucose,fructose metabolism	galactose 1-phosphate	1.0015	0.9814	0.665	0.9985	1.5092	1.0484	1.0284	0.9575	0.954	0.9749	0.9144	1.0043	1.1041	1.5362	1.4062	1.4209	1.0832	1.2318	1.0824	1.4033	1.4224	1.4833	0.1547	0.1221	0.112	0.1506	0.3013	0.3233	0.3828	0.3202
489	221	20705	LC/MS Polar	100000852	2573	209.067	62475-58-5	71306729				Carbohydrate	Sucrose, glucose,fructose metabolism	glucoheptose	2.5083	1.6742	1.25	2.7895	2.2391	4.0761	1.8751	0.6976	0.8191	2.7572	0.5636	0.5898	0.6825	3.1052	0.9172	1.2994	0.8694	2.8725	2.9908	1.8067	3.7687	1.0445	0.8904	0.9555	0.7493	0.6599	0.3973	0.4943	0.9201	0.4343
491	290	46142	LC/MS Polar	100001740	2260	181.072		5780	C01507	HMDB00247	SORBITOL	Carbohydrate	Sucrose, glucose,fructose metabolism	mannitol/sorbitol	1.0381	1.1018	0.9494	1.0719	0.8657	0.8727	0.981	1.0275	1.1227	1.019	0.5015	0.4946	0.5267	1.2462	1.1492	1.266	1.2036	1.3321	1.2719	1.3732	1.4837	1.3705	0.6864	0.6351	0.6648	0.5712	0.3977	0.4264	0.3836	0.3815
497	288	15586	LC/MS Polar	913	3329.4	387.114	6363-53-7	10991489	C00208	HMDB00163	MALTOSE	Carbohydrate	Sucrose, glucose,fructose metabolism	maltose	1.3114	1.3833	1.2655	1.4317	0.7636	0.7813	0.8905	0.976	1.0894	1.024	0.8405	0.7744	0.8411	1.2065	1.2098	1.2839	1.223	1.3062	1.2188	1.1273	1.2072	1.1266	0.016	0.0134	0.0123	0.012	0.0424	0.0439	0.0437	0.0483
500	289	44688	LC/MS Neg	100000276	812	503.162	1109-28-0	439586	C01835	HMDB01262	MALTOTRIOSE	Carbohydrate	Sucrose, glucose,fructose metabolism	maltotriose	1.8416	1.6428	1.6807	1.962	1.5235	1.5642	1.3513	0.9975	0.9024	0.9112	0.9583	1.0025	1.0947	1.9367	1.7074	1.5708	1.4897	1.7	1.1815	0.997	0.9245	0.8554	0.1605	0.2004	0.1458	0.1583	0.4082	0.3992	0.4302	0.4105
504	291	48153	LC/MS Polar	803	2200	225.062	3458-28-4	18950	C00159	HMDB00169	L-mannose	Carbohydrate	Sucrose, glucose,fructose metabolism	mannose	0.9103	0.8817	1.1162	1.1733	2.076	1.8556	0.9981	1.1638	1.1699	1.1039	0.9752	0.492	1.0123	0.6242	1.3191	1.177	1.0019	1.0437	1.0742	0.983	1.1432	1.144	0.17	0.3664	0.1972	0.2382	0.5769	0.6157	0.6476	0.4365
514	380	586	LC/MS Neg	879	978	503.162	17629-30-0	10542	C00492	HMDB03213	CPD-1099	Carbohydrate	Sucrose, glucose,fructose metabolism	raffinose	0.3334	0.1707	0.1198	0.2459	0.4333	0.5158	0.2297	0.4569	0.5558	0.5483	0.3258	0.1198	0.2643	4.2267	4.127	4.1745	1.2082	1.3921	1.0514	0.7781	0.9486	0.1198	2.6413	2.7087	2.2683	2.2055	5.929	6.3832	6.1136	5.6189
520	400	15960	LC/MS Polar	934	5280	665.215	10094-58-3	439531	C01613	HMDB03553	CPD-170	Carbohydrate	Sucrose, glucose,fructose metabolism	stachyose	0.0363	0.0363	0.0363	0.0363	0.0363	0.0363	0.0363	0.0363	0.0363	0.0363	0.0363	0.0363	0.0363	1.7882	1.7552	1.8186	0.0363	0.0374	0.0453	0.0363	0.0363	0.0363	0.2448	0.2082	0.2079	0.1887	7.9525	7.9772	7.7788	7.3173
521	406	1519	LC/MS Polar	935	3092	387.114	57-50-1	5988	C00089	HMDB00258	SUCROSE	Carbohydrate	Sucrose, glucose,fructose metabolism	sucrose	0.9454	1.0376	1.0142	1.015	1.8201	1.8091	1.737	1.1862	1.165	0.9959	0.9607	0.9622	0.9554	2.2526	2.2808	2.1757	0.93	1.0041	0.932	1.5599	1.6462	1.6941	0.5418	0.4789	0.498	0.4669	0.6718	0.7034	0.6645	0.61
545	124	15442	LC/MS Neg	100000341	583.9	275.017	921-62-0;53411-70-4	91493	C00345	HMDB01316	CPD-2961	Carbohydrate	Sucrose, glucose,fructose metabolism	6-phosphogluconate	0.3382	0.1669	0.2962	0.1669	0.1669	0.1669	0.1669	0.1669	0.3274	0.1669	0.2473	0.2591	0.2904	0.9611	1.1866	1.4732	1.2037	1.2615	1.0389	1.8903	2.0845	2.3637	0.1669	0.1669	0.1669	0.1669	0.1669	0.1669	0.1669	0.1669
546	222	587	LC/MS Polar	338	2922	195.051	527-07-1	10690	C00257	HMDB00625	GLUCONATE	Carbohydrate	Sucrose, glucose,fructose metabolism	gluconate	0.8825	1.0688	1.1545	1.0029	1.4236	1.4306	0.9971	1.633	1.2018	0.9773	0.4638	0.6202	0.5818	1.1492	1.1099	0.9931	1.1982	1.2006	1.2063	1.4309	1.4629	1.7067	0.0144	0.0177	0.0297	0.0283	0.0569	0.119	0.038	0.0436
553	170	47076	LC/MS Polar	100006438	2600	129.019						Carbohydrate	C5 branched dibasic acid metabolism	citraconate/glutaconate	1.3221	0.9922	0.8238	1.0525	1.34	1.2027	1.8151	2.35	1.479	0.897	1.1672	0.9191	1.3225	0.9998	1.2886	1.1819	1.0002	1.0678	0.8437	0.9328	1.1325	1.0092	0.3186	0.2458	0.2527	0.2557	0.2954	0.3337	0.2665	0.2911
559	15	33971	LC/MS Neg	100001278	5555	267.233	29743-97-3	5312435		HMDB60038		Lipids	Free fatty acid	10-heptadecenoate (17:1n7)	0.8507	1.0226	0.3227	0.568	2.7563	1.6935	2.1063	0.45	0.69	0.6273	0.9774	0.6123	1.1395	0.915	0.6938	1.1543	1.0407	0.8747	0.7005	0.9125	1.2771	0.8353	2.2121	2.194	1.8902	1.5529	0.91	1.1123	1.0431	1.3935
564	87	32413	LC/MS Neg	100001180	5364	243.197	2507-55-3	1563	C13790	HMDB02261		Lipids	Free fatty acid	2-hydroxymyristate	0.8248	0.8248	0.8248	0.8248	0.8248	0.8248	0.8248	0.8248	0.8248	0.8248	0.8248	0.8248	0.8248	0.8248	0.8248	0.8248	0.8248	0.8248	0.8248	0.8248	0.8248	0.8248	1.1878	1.0034	0.9966	0.8248	1.0061	1.1623	0.9656	0.8823
565	89	35675	LC/MS Neg	100001579	5511.2	271.228	764-67-0	92836		HMDB31057		Lipids	Free fatty acid	2-hydroxypalmitate	0.8917	0.963	0.4934	0.7915	1.8306	1.378	1.1858	0.8563	0.872	0.6448	0.8046	0.8335	1.0025	1.0079	1.0531	0.9975	0.8825	0.9797	0.9309	0.9054	1.4757	0.8824	102.228	92.9005	80.7466	61.517	36.3694	41.9108	37.5431	36.9314
566	90	17945	LC/MS Neg	1239	5695	299.259	629-22-1	69417	C03045			Lipids	Free fatty acid	2-hydroxystearate	0.6091	0.6091	0.6091	0.6091	0.6091	0.6091	0.6091	0.6091	0.6091	0.6091	0.6091	0.6091	0.6091	0.6091	0.6091	0.6091	0.6091	0.6091	0.6091	0.6091	0.6091	0.6091	1.7902	1.8034	1.4065	1.1943	0.6091	0.7996	0.6954	0.8057
570	105	22001	LC/MS Neg	100000773	3446	159.103	88930-08-9	26613		HMDB01954		Lipids	Free fatty acid	3-hydroxyoctanoate	1.2053	1.2196	1.1137	1.2934	0.9724	1.2296	1.1211	1.0276	1.1834	1.092	0.8151	0.7747	0.7007	0.8419	0.7861	0.7284	1.222	1.392	1.1511	1.0402	1.3195	1.1585	0.0542	0.0529	0.0417	0.0406	0.0352	0.0338	0.033	0.0316
571	106	27503	LC/MS Neg	100000983	5476	271.228	928-17-6	301590		HMDB10734		Lipids	Free fatty acid	3-hydroxypalmitate	1.2879	1.0006	0.6562	0.7492	1.8228	1.184	1.2209	0.795	0.7951	0.7191	0.9132	0.7609	0.7559	1.2243	1.1148	1.3315	0.9487	0.9994	0.777	1.0462	1.4069	1.1504	0.6562	0.6562	0.6562	0.6562	0.6562	0.6562	0.6562	0.6562
573	115	38309	LC/MS Neg	143	4745	155.108	75899-68-2;128946-65-6	1693		HMDB04362		Lipids	Free fatty acid	4-hydroxy-2-nonenal	1.1095	1.1778	1.159	1.6605	0.623	0.8827	0.7596	1.2134	1.3484	1.3129	1.193	0.9748	0.7172	1.0252	0.9558	0.9163	1.5	2.2834	1.4018	1.0288	1.6053	1.2499	0.0907	0.059	0.0636	0.0793	0.1027	0.0658	0.0756	0.1101
577	125	21239	LC/MS Neg	100000956	2300.4	159.103	764-89-6	69820				Lipids	Free fatty acid	8-hydroxyoctanoate	0.8352	0.916	0.8152	0.9697	1.908	2.503	1.6702	1.1354	1.2593	1.2364	1.0893	0.979	0.8083	1.311	1.1179	1.2684	0.9837	1.3114	1.0163	1.2841	1.4073	1.3632	0.5868	0.5036	0.4147	0.4554	0.3172	0.302	0.3163	0.2503
584	164	32489	LC/MS Neg	926	2713.7	115.076	142-62-1	8892	C01585	HMDB00535		Lipids	Free fatty acid	caproate (6:0)	1.0847	1.0248	1.0395	1.1054	1.2998	1.4423	1.2359	0.8162	0.9207	0.7737	0.9341	0.8879	0.7693	1.2609	1.1043	0.8706	0.961	1.3932	0.9812	0.868	1.0188	0.8453	0.7693	0.7693	0.7693	0.7693	0.7693	0.7693	0.7693	0.7693
595	190	33587	LC/MS Neg	100001335	5950	309.28		5282768		HMDB02231	CPD-12189	Lipids	Free fatty acid	eicosenoate (20:1)	1.8579	1.1873	0.6161	0.7974	5.2984	3.2366	3.2983	0.7197	0.9864	0.5586	1.0136	0.8487	0.7404	2.7128	2.0537	2.8719	1.4444	1.8293	1.0519	1.5386	2.4551	1.973	0.6131	0.6543	0.4182	0.4016	0.389	0.435	0.3474	0.3917
596	191	1552	LC/MS Neg	1087	6355.6	337.311	112-86-7	5281116	C08316	HMDB02068		Lipids	Free fatty acid	erucate (22:1n9)	1.1493	0.7608	0.269	0.5634	1.3419	1.1587	0.9838	0.4779	0.5277	0.4716	1.1947	0.8764	0.881	0.7798	1.0162	1.2486	0.9544	1.4021	0.6849	0.7562	1.4681	0.8775	1.179	1.3826	1.0505	1.0783	0.7572	1.1342	1.1789	1.095
607	274	1105	LC/MS Neg	180	5535	279.233	60-33-3	5280450	C01595	HMDB00673	LINOLEIC_ACID	Lipids	Free fatty acid	linoleate (18:2n6)	1.371	1.3294	0.6007	0.9903	2.4084	1.5175	2.3364	0.6687	0.902	1.2183	0.9824	1.0097	1.5685	1.3904	1.3434	1.798	1.4321	1.1611	0.8005	0.9806	1.6971	1.2305	0.7468	0.8682	0.6307	0.5189	0.3567	0.3977	0.2722	0.6231
608	275	34035	LC/MS Neg	100001337	5450	277.217		5280934	C06426	HMDB03073	CPD-8117	Lipids	Free fatty acid	linolenate [alpha or gamma; (18:3n3 or 6)]	1.2818	1.1448	0.6631	1.0367	2.6711	1.5965	2.0263	0.7219	0.9762	0.7447	0.5762	0.7942	0.8782	1.2313	1.0238	1.7475	0.9229	1.0762	0.7358	0.8222	1.1425	0.9484	3.3538	3.0665	2.5206	1.9713	0.8892	0.8164	0.7988	0.7223
619	352	1336	LC/MS Neg	424	5618	255.233	57-10-3	985	C00249	HMDB00220	PALMITATE	Lipids	Free fatty acid	palmitate (16:0)	1.1908	1.1512	0.5377	0.6169	2.9521	1.5025	1.8015	0.9452	1.0751	0.7401	0.8434	0.8225	1.0345	1.4421	1.2872	1.5983	1.3707	1.0682	0.9655	1.1957	1.4356	1.3809	0.5691	0.5916	0.6289	0.5422	0.4442	0.4996	0.5244	0.5345
635	143	37073	LC/MS Neg	100001723	1920	131.071	6064-63-7	99824		HMDB01624		Lipids	Free fatty acid	alpha-hydroxycaproate	0.9685	1.0053	0.9432	1.4099	1.539	1.4892	1.544	1.0526	0.7561	0.8414	1.3581	1.0381	0.9051	0.8173	0.7339	0.6306	0.9236	1.13	0.9908	1.2236	1.1356	0.9947	0.6306	0.6306	0.6306	0.6306	0.6306	0.6306	0.6306	0.6306
646	85	52281	LC/MS Polar	100008928	1258	103.04						Lipids	Free fatty acid	2-hydroxybutyrate/2-hydroxyisobutyrate	1.6397	1.0938	1	1.4645	2.2232	2.0526	2.089	1.2072	1.287	0.9453	1.1951	0.8975	0.802	0.6119	0.8856	0.7331	0.5528	1.4191	0.9927	1.2854	1.1862	1.6344	0.4997	0.2567	0.4125	0.3682	0.2567	0.2567	0.6961	0.2567
647	86	37253	LC/MS Polar	100002070	3352.8	147.03	40951-21-1	43	C02630	HMDB00606	CPD-381	Lipids	Free fatty acid	2-hydroxyglutarate	1.0601	1.2051	1.0735	1.2426	1.0195	1.1361	1.0961	1.0194	1.0615	0.9376	0.6315	0.64	0.6065	1.8224	1.8588	1.7812	0.897	0.9806	0.9125	1.6043	1.6473	1.5106	0.7474	0.7386	0.7919	0.5954	0.7056	0.74	0.6194	0.5626
649	339	52285	LC/MS Neg	100008930	5655	281.249						Lipids	Free fatty acid	oleate/vaccenate (18:1)	1.6714	1.449	0.4673	0.5214	6.0654	3.0051	3.6292	0.7926	0.9231	0.5036	0.7272	0.7326	1.0769	2.8701	2.5425	3.3914	1.5508	1.1694	1.0947	1.435	2.0447	1.8342	0.2438	0.2848	0.2382	0.2109	0.1711	0.1953	0.2305	0.1848
650	107	52938	LC/MS Neg	100008933	5674	299.259	45261-96-9	5282907				Lipids	Free fatty acid	3-hydroxystearate	1.4077	0.9246	0.5101	0.5424	1.8908	1.3675	1.0084	0.7982	0.6931	0.4998	0.7725	0.9651	1.1022	1.5238	1.4263	1.5698	0.9916	0.8419	1.0734	0.7448	1.5826	1.1767	0.4998	0.4998	0.4998	0.4998	0.4998	0.4998	0.4998	0.4998
653	103	542	LC/MS Polar	254	1443.3	103.04	625-72-9	441	C01089	HMDB00357	Hydroxy-Butyrates	Lipids	Free fatty acid	3-hydroxybutyrate (BHBA)	1.2457	0.5383	0.7338	0.6551	0.8961	1.055	1.7251	0.5383	1.8297	1.0997	0.5383	0.5383	0.706	1.7899	1.5258	1.4717	0.5383	0.5383	0.945	0.908	0.6334	0.5383	0.5383	0.5383	0.5383	0.5383	0.5383	0.5383	0.5383	0.5383
657	104	53230	LC/MS Neg	100006367	1725	131.071	10191-24-9	151492				Lipids	Free fatty acid	3-hydroxyhexanoate	1.0801	1.1075	1.086	1.3794	0.8465	1.0008	0.8648	0.9771	1.0284	0.9811	0.917	0.694	0.6661	0.7478	0.7955	0.7146	1.07	1.5141	1.2726	1.0735	1.383	0.9992	0.6661	0.6661	0.6661	0.6661	0.6661	0.6661	0.6661	0.6661
660	88	54920	LC/MS Neg	100010866	5560	297.244	56472-29-8	9796304				Lipids	Free fatty acid	2-hydroxyoleic acid	0.5868	0.5868	0.5868	0.5868	0.5868	0.5868	0.5868	0.5868	0.5868	0.5868	0.5868	0.5868	0.5868	0.5868	0.5868	0.5868	0.5868	0.5868	0.5868	0.5868	0.5868	0.5868	2.041	2.0787	1.5149	1.1731	0.5868	0.8269	0.6106	0.7614
663	340	38102	LC/MS Neg	1137	6400	324.291	11-58-0;111-58-0	5283454		HMDB02088		Lipids	Fatty acid amide	oleoyl ethanolamide	1.1722	0.6888	0.3527	0.4852	4.9168	3.4187	3.2426	0.3527	0.5473	0.3527	1.0293	0.5469	0.4766	1.6525	1.3625	1.6456	0.6767	1	0.4324	0.4629	1.7015	0.5538	2.9257	3.1589	2.0629	1.3822	0.9542	0.7937	0.3527	0.8342
671	278	52608	LC/MS Neg	100006726	6150	322.275	68171-52-8	5283446		HMDB12252		Lipids	Fatty acid amide	linoleoyl ethanolamide	1.4001	0.7782	0.5505	0.5505	1.8398	0.7803	1.3544	0.5505	0.9028	0.5505	0.7255	0.5505	0.5505	1.1584	0.5505	1	1.2301	1.7833	0.8893	1.0652	1.4872	1.0925	1.626	1.44	0.8787	0.5505	0.8409	0.8592	0.5586	0.8376
672	17	37752	LC/MS Neg	100002196	5275	295.228		43013				Lipids	Oxylipins	13-HODE + 9-HODE	0.9166	1.0994	0.9985	1.3346	2.167	2.996	2.3157	1.0015	0.8892	0.891	1.7176	1.3411	1.0695	1.3214	1.1142	1.0635	0.9728	1.3712	1.0679	0.7514	1.3563	0.9564	0.4755	0.5092	0.4039	0.3446	0.206	0.2694	0.2293	0.2034
675	16	38395	LC/MS Neg	62	5137	313.238	263399-35-5	10236635	C14829	HMDB04705	CPD-13086	Lipids	Oxylipins	12,13-DiHOME	1.0558	0.9426	0.7639	1.1869	1.2595	2.602	1.9874	1.1388	0.7953	0.7992	1.1665	0.9917	0.6875	1.4044	0.8815	0.8558	1.0548	1.4797	0.9835	0.9395	1.6239	0.967	1.4698	1.3641	1.1165	1.0083	0.7555	0.733	0.7762	0.6142
676	126	38399	LC/MS Neg	179	5180	313.238	263399-34-4	9966640	C14828	HMDB04704		Lipids	Oxylipins	9,10-DiHOME	0.9722	0.8967	0.3083	1.2382	1.4418	2.2164	1.5026	0.8401	0.3281	0.9276	1.1291	1.1092	0.6038	1.3063	0.3083	1.0132	0.6656	1.6372	1	0.8466	1.4517	0.8305	1.3929	1.4293	1.1459	1.0775	0.7321	0.8163	0.729	0.612
686	18	46109	LC/MS Pos Late	100002836	1313	277.216	74784-20-6					Lipids	Oxylipins	13-HOTrE	0.8105	0.7165	0.8518	0.7342	1.908	1.7974	1.815	0.8385	0.97	0.8587	1.0209	1.0391	0.9791	1.2152	1.1652	1.2787	0.8	0.8568	0.8204	0.8288	0.827	0.8966	2.6315	2.2645	2.4545	2.1942	1.2635	1.1752	1.0895	0.9584
699	353	52944	LC/MS Pos Late	100009233	1482	342.337		151731				Lipids	Fatty acid ester	palmitoylcholine	0.9263	0.814	0.9754	1.0173	1.3908	1.5024	1.3725	0.958	1.1465	1.2258	1.0911	1.0358	1.011	0.8486	0.86	0.6879	0.989	1.1053	0.9342	1.1168	1.2255	1.137	0.3222	0.2147	0.2304	0.2338	0.2147	0.2147	0.2147	0.2147
700	341	53260	LC/MS Pos Late	100009331	1449	368.352						Lipids	Fatty acid ester	oleoylcholine	1.1345	0.9855	1.0245	1.1178	2.9556	3.0167	2.6184	0.6705	0.8976	1.0145	0.8879	1.1528	0.8405	1.4296	1.315	0.7082	0.7343	0.9566	0.9062	0.8398	1.1902	0.9434	0.6705	0.6705	0.6705	0.6705	0.6705	0.6705	0.6705	0.6705
709	24	27447	LC/MS Neg	100001040	6477	279.233	2277-28-3	5283469				Lipids	Glycerolipids	1-linoleoylglycerol (18:2)	0.8267	0.4641	0.2039	0.2039	1.8652	0.2039	0.3293	0.2039	0.9125	0.2039	0.2039	3.9355	0.5577	0.8206	0.3934	2.5329	0.3304	0.2039	0.2039	0.2039	2.0389	0.5047	1.8822	1.5147	1.1908	3.0977	1.3128	1.0875	0.8927	1.5094
711	40	21184	LC/MS Neg	100000924	6500	281.249	111-03-5	5283468		HMDB11567		Lipids	Glycerolipids	1-oleoylglycerol (18:1)	1.6378	1.267	0.9947	1.0053	9.3183	5.9519	5.7027	0.7062	0.8569	0.4161	1.4285	1.3436	1.7055	1.0822	1.0219	1.1652	0.9433	1.0055	0.6766	0.7136	1.108	0.8586	0.8698	1.093	0.5668	0.4828	0.299	0.8225	0.4661	0.5938
718	94	21232	LC/MS Neg	100000943	6300	281.249	3443-84-3	5319879				Lipids	Glycerolipids	2-oleoylglycerol (18:1)	1.595	1.1627	0.5088	0.5222	11.6419	5.8162	6.3731	0.644	0.8786	0.4551	1.1271	1.1988	1.2282	1.3783	1.243	1.5872	0.9477	1.1583	0.7068	0.904	1.4561	1.0523	0.1626	0.1984	0.1136	0.1121	0.0906	0.0906	0.0906	0.1892
729	232	15122	LC/MS Neg	1254	758	91.0401	56-81-5	753	C00116	HMDB00131	GLYCEROL	Lipids	Glycerolipids	glycerol	1.0559	0.9453	1.226	1.2015	2.0195	2.3923	2.1865	1.1038	1.0321	0.9989	0.9063	1.0011	1.074	0.7975	0.7682	0.6603	1.1095	0.9399	1.0133	1.1271	1.0597	1.0503	0.5545	0.6983	0.6377	0.6491	0.3242	0.4757	0.3366	0.4005
730	44	45968	LC/MS Polar	100005716	825	509.288						Lipids	Glycerolipids	1-oleoyl-GPG (18:1)*	1.1085	0.9948	1.1125	0.98	3.8621	4.7193	3.8367	1.066	0.898	0.9298	1.024	1.5157	1.0723	1.0256	0.8486	0.7745	0.741	0.9942	1.0052	0.6184	0.5921	0.5978	0.5921	0.5921	0.5921	0.5921	0.5921	0.5921	0.5921	0.5921
735	345	46799	LC/MS Pos Late	100002990	3223	636.556	104346-53-4					Lipids	Glycerolipids	oleoyl-linoleoyl-glycerol (18:1/18:2) [2]	1.1086	1.3259	1.3497	1.1749	2.1366	2.272	1.4823	0.8078	0.6543	0.6015	1.5922	1.5394	1.2696	1.5432	1.5223	1.631	0.82	0.5378	0.6773	0.8914	1.5197	1.5257	0.5374	0.5531	0.4024	0.3777	0.4191	0.3531	0.4839	0.3756
736	355	52633	LC/MS Pos Late	100009052	3080	610.541		9543695		HMDB05207,HMDB07103		Lipids	Glycerolipids	palmitoyl-linoleoyl-glycerol (16:0/18:2) [1]*	0.898	1.0311	0.8991	0.9032	1.3728	1.3425	1.3853	0.5872	0.5309	0.5032	1.4553	1.2811	1.3007	0.9323	0.9134	1.0766	0.5173	0.3739	0.4857	0.7264	0.9689	0.8368	2.1182	2.1221	1.5933	1.3612	1.3524	0.9689	1.637	1.4068
737	356	52634	LC/MS Pos Late	100009055	3197	610.541						Lipids	Glycerolipids	palmitoyl-linoleoyl-glycerol (16:0/18:2) [2]*	0.8159	1.0077	1.0457	0.856	1.0929	1.1465	0.6799	0.9738	0.758	0.6986	1.3051	1.3162	1.0344	1.3934	1.4276	1.4688	1.0128	0.6638	0.8452	0.776	1.5089	1.513	1.0584	1.0894	0.8106	0.7314	0.8782	0.7584	0.9923	0.7263
743	184	54966	LC/MS Pos Late	100010940	2733	608.525						Lipids	Glycerolipids	diacylglycerol (16:1/18:2 [2], 16:0/18:3 [1])*	0.638	0.6563	0.6065	0.4739	1.1981	1.4008	1.0471	0.6053	0.2697	0.4566	1.2617	1.512	1.1212	0.8454	0.9529	1.0683	0.4298	0.3466	0.3249	0.8516	0.7578	0.3871	14.8608	13.214	13.3479	5.6816	5.4024	7.7028	10.3025	6.1388
744	276	54951	LC/MS Pos Late	100010932	2229	630.509						Lipids	Glycerolipids	linolenoyl-linolenoyl-glycerol (18:3/18:3) [1]*	0.5496	0.5496	0.5496	0.5496	0.5496	0.5496	0.5496	0.5496	0.5496	0.5496	0.5496	0.5496	0.5496	0.5496	0.5496	0.5496	0.5496	0.5496	0.5496	0.5496	0.5496	0.5496	1.2903	1.5363	1.1799	0.8201	0.5496	0.5496	0.6662	0.5496
745	277	54952	LC/MS Pos Late	100010933	2268	630.509						Lipids	Glycerolipids	linolenoyl-linolenoyl-glycerol (18:3/18:3) [2]*	0.9333	0.9058	0.8126	1.032	0.9046	0.9008	1.0152	0.477	0.4284	0.4459	1.7125	1.4156	1.6257	1.1097	0.9848	1.5382	0.4431	0.4165	0.3797	0.6277	0.6568	0.5764	3.918	3.8252	2.971	2.2632	2.0316	2.1275	2.8132	2.3525
746	279	54963	LC/MS Pos Late	100010926	2426	632.525						Lipids	Glycerolipids	linoleoyl-linolenoyl-glycerol (18:2/18:3) [1]*	1.0352	1.0069	1.1306	1.0735	1.3053	1.2788	0.9787	0.5708	0.4767	0.4802	1.2292	1.6733	1.2728	0.9931	1.0147	0.9339	0.3928	0.3571	0.3719	0.7338	0.7378	0.9087	1.6659	1.749	1.2787	1.1511	0.8044	0.7568	1.0905	0.8349
747	280	54964	LC/MS Pos Late	100010927	2478	632.525						Lipids	Glycerolipids	linoleoyl-linolenoyl-glycerol (18:2/18:3) [2]*	1.0118	0.9882	0.9791	1.0716	1.1136	1.1232	1.0983	0.7162	0.6884	0.6622	1.4177	1.3705	1.2973	1.41	1.3971	1.5679	0.6639	0.6828	0.6351	1.1353	1.2212	1.2016	1.0452	0.9438	0.7246	0.6291	0.6785	0.5781	0.8763	0.6167
748	281	54968	LC/MS Pos Late	100010941	2689	634.541						Lipids	Glycerolipids	linoleoyl-linoleoyl-glycerol (18:2/18:2) [1]*	1.353	1.4179	0.7565	1.1175	1.1516	1.385	1.8418	0.4938	0.4522	0.5764	1.9602	1.5266	2.0515	0.7007	0.8765	1.4364	0.5492	0.5108	0.5368	0.9363	1.0637	0.3354	0.3354	0.3354	0.3354	0.3354	0.3354	0.3354	0.3354	0.3354
749	282	54969	LC/MS Pos Late	100010942	2760	634.541						Lipids	Glycerolipids	linoleoyl-linoleoyl-glycerol (18:2/18:2) [2]*	1.3865	1.1293	1.0061	1.0883	0.7299	0.6378	0.7404	0.6652	0.7889	0.9079	1.2905	1.0878	0.9939	0.865	0.9777	1.2233	1.2476	1.0357	0.9543	1.163	1.1043	0.8839	0.6378	0.6378	0.6378	0.6378	0.6378	0.6378	0.6378	0.6378
750	343	54970	LC/MS Pos Late	100010944	2819	634.541						Lipids	Glycerolipids	oleoyl-linolenoyl-glycerol (18:1/18:3) [2]*	0.509	0.9139	0.7924	0.509	1.6729	1.7497	1.6497	0.509	0.509	0.509	0.9918	1.0544	0.9824	1	1.0527	1.4294	0.509	0.509	0.509	0.7877	0.8256	0.7235	1.5563	1.599	1.5102	0.9439	1.0775	0.8638	1.1652	0.8992
752	346	54946	LC/MS Pos Late	100010919	3695	638.572						Lipids	Glycerolipids	oleoyl-oleoyl-glycerol (18:1/18:1) [2]*	1.0578	1.1745	1.0377	0.9615	3.4413	3.4689	3.1727	1.0248	1.0263	0.8334	1.1731	1.0124	0.9296	1.3738	1.6417	1.7309	0.8266	0.6301	0.5924	0.9876	1.18	1.4652	0.4288	0.425	0.2815	0.265	0.4	0.3956	0.5638	0.5169
755	354	54965	LC/MS Pos Late	100010939	2834	608.525						Lipids	Glycerolipids	palmitoyl-linolenoyl-glycerol (16:0/18:3) [2]*	0.5558	0.7081	0.6816	0.359	1.2751	1.2607	1.185	0.6017	0.3507	0.5891	0.9822	1.0373	0.9915	1.0037	1.1088	1.4216	0.4847	0.4459	0.4442	0.9014	0.9963	0.8842	11.5597	11.6813	10.2738	7.6303	7.3507	6.7536	8.1129	7.0603
756	358	54942	LC/MS Pos Late	100010917	3695	612.556						Lipids	Glycerolipids	palmitoyl-oleoyl-glycerol (16:0/18:1) [2]*	0.9159	1.1094	0.8488	0.9905	2.5927	2.5168	2.4967	1.0858	1.0907	0.9699	1.2	1.2219	1.0965	1.7289	1.899	1.9114	0.8744	0.698	0.7272	1.0095	1.1729	1.1097	0.7787	0.7461	0.5114	0.5057	0.3556	0.2872	0.437	0.3627
757	402	54947	LC/MS Pos Late	100010921	3762	638.572						Lipids	Glycerolipids	stearoyl-linoleoyl-glycerol (18:0/18:2) [2]*	1.2012	1.2541	1.1855	1.2263	1.0444	1.1012	0.9855	0.9642	0.9084	0.8076	1.4653	1.4364	1.3525	0.9998	1.2129	1.1562	1.1727	0.973	0.9524	1.0002	1.0846	1.1958	0.4851	0.4528	0.3158	0.3059	0.2468	0.1837	0.3365	0.3101
760	357	54943	LC/MS Pos Late	100010916	3562	612.556						Lipids	Glycerolipids	palmitoyl-oleoyl-glycerol (16:0/18:1) [1]*	0.8291	1.16	1.3583	0.7996	3.6875	3.8683	1.3283	0.936	0.8227	0.6435	1.2017	1.6864	0.6103	0.2248	0.2248	1.3362	0.6146	0.2248	0.4409	0.2248	0.8018	0.2248	0.2248	0.2248	1.3485	1.064	0.2248	0.2248	0.2248	0.2248
764	342	57349	LC/MS Pos Late	100010943	2740	634.541						Lipids	Glycerolipids	oleoyl-linolenoyl-glycerol (18:1/18:3) [1]*	0.4919	0.4919	0.4919	0.4919	0.4919	0.4919	0.4919	0.4919	0.4919	0.4919	0.4919	0.4919	0.4919	0.4919	0.4919	0.4919	0.4919	0.4919	0.4919	0.4919	0.4919	0.4919	1.7761	1.4949	1.3585	0.4919	0.5882	0.5036	0.9194	1.0806
765	401	57326	LC/MS Pos Late	100015585	3317	636.556						Lipids	Glycerolipids	stearoyl-linolenoyl-glycerol (18:0/18:3) [2]*	0.6332	0.8098	0.9343	0.6045	1.15	1.2064	0.363	0.8395	0.5607	0.5848	1.1265	1.2703	0.6445	1.0168	1.1194	0.8733	0.6605	0.3269	0.5037	0.3568	0.9832	1.0409	7.555	8.0743	5.5671	4.8997	3.2169	2.5894	4.156	2.4702
768	26	34419	LC/MS Pos Late	100001395	1465	520.34		11988421	C04100	HMDB10386		Lipids	Phospholipids	1-linoleoyl-GPC (18:2)	1.0613	1.2081	1.0138	0.8866	0.6696	0.7031	0.6319	0.8951	0.7733	0.713	0.5737	1	0.5859	1.6396	1.5319	1.9059	1.1682	1.2754	1.7351	1.2712	1.0814	1.256	0.2231	0.2134	0.1582	0.1582	0.1582	0.1582	0.1582	0.1582
769	27	32635	LC/MS Neg	100001570	5900	476.278		52925130		HMDB11507		Lipids	Phospholipids	1-linoleoyl-GPE (18:2)*	0.6524	0.3317	0.3317	0.3317	1.4931	1.1679	1.1869	0.5476	0.573	0.3317	0.3317	0.3317	0.3317	0.9845	1.4418	1.8478	0.7577	0.9982	0.499	1	1.6543	1.6132	3.3758	2.1735	1.4437	1.3273	0.483	0.6663	0.9539	0.3317
770	28	36594	LC/MS Neg	100001778	5494	595.289						Lipids	Phospholipids	1-linoleoyl-GPI (18:2)*	0.6525	0.3504	0.3364	0.3579	1.436	1.0474	1.23	0.7654	0.8649	0.9122	0.2875	0.3645	0.2906	1.0374	1.2252	1.2036	1.3902	1.246	0.9626	1.0913	2.1531	1.8678	0.2875	0.2875	0.2875	0.2875	0.2875	0.2875	0.2875	0.2875
773	42	48258	LC/MS Neg	100001272	6250	596.357	19420-56-5	16081932		HMDB02815		Lipids	Phospholipids	1-oleoyl-GPC (18:1)	1.213	0.7957	0.45	0.5029	6.6931	4.1183	5.0318	0.6916	1.027	0.6707	0.9151	0.9091	0.624	1.6056	1.8016	2.1642	0.918	1.2912	0.7397	0.973	1.9576	1.6418	0.45	0.45	0.45	0.45	0.45	0.45	0.45	0.45
774	43	35628	LC/MS Pos Late	100001569	1554	480.308	89576-29-4	9547071		HMDB11506		Lipids	Phospholipids	1-oleoyl-GPE (18:1)	0.4668	0.9434	0.901	0.9912	6.4744	6.1366	5.5932	1.0683	0.8862	0.4668	1.1478	1.2473	1.3886	1.0088	1.068	1.217	0.7074	0.8579	0.7683	0.7974	0.863	0.9229	2.7034	2.101	1.7595	1.687	0.5605	0.653	0.5028	0.4668
775	45	36602	LC/MS Neg	100001777	5599	597.305						Lipids	Phospholipids	1-oleoyl-GPI (18:1)*	1.1698	0.8397	0.8774	0.8717	5.2483	3.297	4.4879	0.6025	0.8177	0.7258	1.4508	1.318	1.3341	0.9524	1.3901	1.0476	0.6759	0.679	0.3622	0.5708	1.1104	1.3516	0.3622	0.3622	0.3622	0.3622	0.3622	0.3622	0.3622	0.3622
777	63	34428	LC/MS Polar	100001445	1445	409.236	17618-08-5	6419701	C04036	HMDB00327		Lipids	Phospholipids	1-palmitoyl-GPA (16:0)	1.7829	1.8854	1.6346	1.5167	2.5838	2.5079	2.8063	1.5419	1.4979	1.3177	1.4089	1.5704	1.571	0.9058	0.7937	0.8257	0.9795	1.0851	1.0205	0.7968	0.8892	0.7209	0.1558	0.1408	0.1101	0.0956	0.0824	0.0953	0.0766	0.0807
778	64	33955	LC/MS Pos Late	100001263	1525	496.34	17364-16-8	86554		HMDB10382	2-Acylglycero-Phosphocholines	Lipids	Phospholipids	1-palmitoyl-GPC (16:0)	0.9458	0.9294	0.951	0.9623	1.8033	1.7175	1.7438	1.2608	1.3236	1.312	1.005	0.9572	0.9791	1.1263	1.0542	1.1478	1.0089	1.0852	0.995	1.2141	1.2591	1.2841	0.2122	0.1856	0.1681	0.1426	0.0532	0.0528	0.0494	0.0345
779	65	35631	LC/MS Pos Late	100001567	1544	454.293		9547069		HMDB11503	2-Lysophosphatidylcholines	Lipids	Phospholipids	1-palmitoyl-GPE (16:0)	0.9767	0.9158	0.9364	0.96	1.7144	1.6993	1.7409	1.3167	1.1766	1.1912	1.0208	0.9766	1.0366	0.9729	0.9642	1.0193	0.8828	0.9869	0.9329	1.1156	1.1072	1.162	1.3057	1.0624	1.0131	0.8787	0.2871	0.2912	0.2719	0.2288
780	67	35305	LC/MS Neg	100001655	5564	571.289				HMDB61695		Lipids	Phospholipids	1-palmitoyl-GPI (16:0)*	1.082	0.8426	0.8563	0.9156	3.4848	2.1468	2.4298	0.9965	1.0618	0.9751	1.2032	1.1718	0.9973	0.9805	1.1855	1.075	1	1.2562	0.6228	1.0732	1.8729	1.7982	0.0287	0.0232	0.0178	0.0139	0.0139	0.0139	0.0229	0.0139
781	75	33961	LC/MS Pos Late	100001271	1606	524.371	19420-57-6	497299		HMDB10384		Lipids	Phospholipids	1-stearoyl-GPC (18:0)	0.9968	0.9869	1.0606	1.1448	1.6532	1.6109	1.7028	1.1285	1.0231	1.1485	1.1233	1.1276	1.1203	0.8832	0.8165	0.9313	0.911	1.0546	0.9464	1.0046	1.0032	1.0984	0.256	0.2124	0.2012	0.1981	0.0771	0.0797	0.0664	0.0399
782	76	42398	LC/MS Pos Late	100001461	1626	482.324	69747-55-3	9547068		HMDB11130		Lipids	Phospholipids	1-stearoyl-GPE (18:0)	1.068	1.0119	0.9103	0.9503	1.4789	1.3925	1.5307	1.0894	1.1038	1.1958	1.0199	1.0154	1.1117	0.7177	0.642	0.6974	0.9285	1.0673	0.9428	0.8203	1.0164	0.9373	1.1515	0.9801	0.982	1	0.2924	0.2749	0.2424	0.2424
788	97	35253	LC/MS Neg	100001562	6215	570.341		15061532		HMDB61702		Lipids	Phospholipids	2-palmitoyl-GPC (16:0)*	1.0569	0.5871	0.2352	0.397	2.3827	1.6692	1.7233	1.2689	0.9271	0.4131	0.6917	0.5668	0.3388	1.0602	1.1305	1.5594	0.9671	1.0329	0.3622	0.8942	1.7475	1.4293	0.2352	0.2352	0.2352	0.2352	0.2352	0.2352	0.2352	0.2352
792	233	43847	LC/MS Pos Early	100000258	580	173.021	29849-82-9	754	C00093	HMDB00126	GLYCEROL-3P	Lipids	Phospholipids	glycerol 3-phosphate	0.7788	0.7539	0.7444	0.7597	1.6258	1.5359	1.5659	0.8104	0.773	0.7358	0.8634	0.9055	0.9494	0.7667	0.8223	0.8	1.0087	0.9913	1.0482	1.0382	1.0136	1.0755	2.2338	1.8802	1.9317	1.9877	0.9402	1.0532	1.0283	1.0766
793	234	37455	LC/MS Pos Early	100001620	659	216.063	33049-08-0	123874	C01233	HMDB00114		Lipids	Phospholipids	glycerophosphoethanolamine	0.8576	0.7784	0.7089	0.7639	0.9904	1.1067	1.123	1.0298	0.9984	1.0512	0.7886	0.6586	0.6451	1.0016	0.9291	0.9456	1.2318	1.2044	1.2843	1.3447	1.3265	1.362	0.6451	0.6451	0.6451	0.6451	0.6451	0.6451	0.6451	0.6451
794	237	15990	LC/MS Pos Early	100000269	672	258.11	28319-77-9	71920	C00670	HMDB00086	SN-3-GLYCEROPHOSPHOCHOLINE	Lipids	Phospholipids	glycerophosphorylcholine (GPC)	0.661	0.6975	0.6506	0.6694	0.8016	0.8052	0.8309	1.0164	1.0045	0.9963	0.617	0.5865	0.6149	1.1035	1.0863	1.1576	1.0037	1.0159	1.0389	1.2396	1.2571	1.2291	0.5865	0.5865	0.5865	0.5865	0.5865	0.5865	0.5865	0.5865
801	364	1600	LC/MS Polar	1026	4559.1	140.012	1071-23-4	1015	C00346	HMDB00224	PHOSPHORYL-ETHANOLAMINE	Lipids	Phospholipids	phosphoethanolamine	0.3905	0.3409	0.2227	0.3615	0.8695	0.887	1.1805	0.499	0.5435	0.5204	0.862	0.7064	0.7164	0.611	0.6057	0.7166	1.113	1.2296	1.1559	1.9821	2.2038	1.8815	17.5562	14.963	14.5228	13.3795	6.4178	6.7293	6.6877	5.9324
812	78	19324	LC/MS Neg	100000656	5794.3	599.32	796963-93-4			HMDB61696		Lipids	Phospholipids	1-stearoyl-GPI (18:0)	1.3261	0.9208	0.8553	0.7685	2.1142	1.5906	1.5262	0.649	1.0112	0.855	1.1209	1.1978	0.7847	0.7811	0.9888	0.9763	1.1241	1.4342	0.8401	0.981	1.8235	1.7239	0.649	0.649	0.649	0.649	0.649	0.649	0.649	0.649
820	66	45970	LC/MS Neg	100005717	5570	483.273		3300276				Lipids	Phospholipids	1-palmitoyl-GPG (16:0)*	1.4984	1.2957	0.6779	0.7005	2.5974	1.9318	1.8572	0.9531	1.209	0.7862	0.8494	0.8894	1.5494	2.0079	2.2159	2.6538	1.7368	1.5283	1.0011	0.9989	1.7149	1.4163	0.0377	0.0302	0.0249	0.0183	0.009	0.0135	0.0135	0.0102
835	41	36812	LC/MS Pos Late	100001671	1635	437.266	325465-93-8	5497152				Lipids	Phospholipids	1-oleoyl-GPA (18:1)	1.3721	1.2435	1.2038	1.5296	4.5434	4.6666	2.9488	0.816	0.9737	1.0263	1.3918	1.4632	0.8925	0.4905	0.4004	0.7	0.8654	1.0388	0.8595	0.6279	0.6712	0.6891	0.4004	0.4004	0.4004	0.4004	0.4004	0.4004	0.4004	0.4004
836	74	36810	LC/MS Neg	100001670	5829	437.267	325465-92-7;799268-65-8	89567				Lipids	Phospholipids	1-stearoyl-GPA (18:0)	2.6142	1.2074	0.8619	0.6796	2.0847	2.0584	2.0913	0.383	1.1814	0.8496	1.5368	1.3175	0.9459	0.383	1.1243	0.6696	1	1.3053	0.7446	0.5648	0.7469	0.6415	0.383	0.383	0.383	0.383	0.383	0.383	0.383	0.383
837	236	52307	LC/MS Neg	100001621	630	333.059	16824-65-0					Lipids	Phospholipids	glycerophosphoinositol*	0.9983	1.009	1.0263	1.0017	0.6188	0.5864	0.5871	1.1262	1.2805	1.1402	0.713	0.6708	0.7819	1.4545	1.5308	1.5157	1.7456	1.702	1.6826	1.4599	1.4733	1.5786	0.0059	0.0044	0.0051	0.0065	0.0072	0.0081	0.0069	0.0084
850	54	42446	LC/MS Pos Late	1537	2160	758.569	40811-94-7	5287971				Lipids	Phospholipids	1-palmitoyl-2-linoleoyl-GPC (16:0/18:2)	0.9221	0.8412	0.9227	0.9522	0.9677	0.971	1.029	1.1235	0.9344	1.103	1.1162	1.145	1.128	1.7857	1.4583	2.1459	1.1788	1.2375	1.2234	1.9786	1.9675	2.1674	0.1692	0.1097	0.1299	0.1299	0.1184	0.1138	0.1076	0.0894
851	55	42449	LC/MS Pos Late	100001870	2275	716.522		9546747		HMDB05322		Lipids	Phospholipids	1-palmitoyl-2-linoleoyl-GPE (16:0/18:2)	0.9271	0.89	0.8963	0.9423	1.0297	1.0104	1.0794	0.9826	0.8865	0.9896	1.1304	1.115	1.1855	1.7754	1.4821	2.1039	1.0726	1.2213	1.18	1.9836	2.1052	2.0699	0.2276	0.1653	0.1837	0.1953	0.1427	0.1257	0.1459	0.1412
852	57	52450	LC/MS Pos Late	1528	2730	852.56						Lipids	Phospholipids	1-palmitoyl-2-linoleoyl-GPI (16:0/18:2)	0.9075	0.9162	0.8593	0.9106	1.0544	1.0673	1.1037	0.9325	0.9716	1.0113	1.0103	1.0041	0.9959	1.0958	1.0191	1.2548	1.1653	1.1952	1.1797	1.3876	1.3516	1.3026	0.0777	0.0574	0.063	0.0534	0.1095	0.0975	0.097	0.0765
853	39	52451	LC/MS Pos Late	100008979	2700	878.575						Lipids	Phospholipids	1-oleoyl-2-linoleoyl-GPI (18:1/18:2)*	1.0811	1.0051	0.9949	1.0643	1.4781	1.4595	1.591	0.6352	0.7104	0.715	1.0712	1.0402	1.0275	1.2264	1.1093	1.4083	0.7222	0.7574	0.7362	1.2789	1.2927	1.2326	0.0936	0.0745	0.07	0.0447	0.1473	0.1261	0.1327	0.1154
855	60	19263	LC/MS Pos Late	1526	2509	718.538	26662-94-2	5283496		HMDB05320		Lipids	Phospholipids	1-palmitoyl-2-oleoyl-GPE (16:0/18:1)	1.0254	0.9734	0.9247	0.9937	2.0261	2.0251	2.1077	1.0607	0.9119	1.0063	1.2269	1.1719	1.2239	1.7692	1.589	2.0561	0.8229	0.9657	0.9005	1.5315	1.5891	1.6558	0.1378	0.1055	0.1108	0.1122	0.0716	0.0588	0.0623	0.0613
856	59	52461	LC/MS Pos Late	1539	2358	760.585	26853-31-6;26853-31-6	6436017				Lipids	Phospholipids	1-palmitoyl-2-oleoyl-GPC (16:0/18:1)	0.898	0.8399	0.8351	0.9714	1.8171	1.6347	2.0439	1.0351	0.9492	1.1297	1.0507	0.9763	1.0237	1.3124	1.1011	1.6447	0.9525	1.0974	1.066	1.5009	1.5489	1.5374	0.1404	0.0939	0.1045	0.108	0.0676	0.0663	0.0639	0.0557
857	14	52625	LC/MS Pos Late	100000652	3157	740.544		11846227				Lipids	Phospholipids	1,2-dipalmitoyl-GPG (16:0/16:0)	0.972	0.9849	0.9375	0.9959	1.4873	1.4144	1.4644	1.055	1.0041	1.017	1.1784	1.1514	1.1474	1.2137	1.0827	1.2935	0.8182	0.8789	0.8649	1.1643	1.2192	1.242	0.1007	0.0807	0.0861	0.0793	0.0663	0.0563	0.0545	0.0507
858	56	52628	LC/MS Pos Late	1543	2730	764.544						Lipids	Phospholipids	1-palmitoyl-2-linoleoyl-GPG (16:0/18:2)	0.975	0.9653	0.9341	0.9859	1.5682	1.5641	1.6837	0.9672	0.8743	0.9531	1.2205	1.1895	1.3015	1.5219	1.3705	1.7592	1.0141	1.1291	1.0385	1.5554	1.6201	1.4872	0.0603	0.0486	0.0475	0.0451	0.0731	0.061	0.0593	0.0387
861	7	52603	LC/MS Pos Late	100008903	2006	782.569	998-06-1	5288075				Lipids	Phospholipids	1,2-dilinoleoyl-GPC (18:2/18:2)	0.9692	0.9278	0.9847	1.0153	1.0925	1.164	1.2353	0.9173	0.6871	0.8147	1.0792	1.0957	1.1926	1.8624	1.5196	2.3797	0.9241	1.0441	1.0396	1.8797	1.8674	2.029	0.1299	0.0605	0.0685	0.069	0.0635	0.0631	0.0652	0.0672
862	6	52680	LC/MS Pos Late	100009072	2530	714.507						Lipids	Phospholipids	1,2-dilinoleoyl-GPA (18:2/18:2)*	1.3813	1.3285	1.2617	1.3771	1.3325	1.3726	1.3554	0.9071	0.9217	0.9772	1.2734	1.2027	1.2948	0.7252	0.6477	0.9066	0.9242	1.012	0.9518	0.944	0.956	0.988	0.6477	0.6477	0.6477	0.6477	0.6477	0.6477	0.6477	0.6477
864	22	52695	LC/MS Pos Late	100009086	2300	712.491						Lipids	Phospholipids	1-linoleoyl-2-linolenoyl-GPA (18:2/18:3)*	1.6145	1.5606	1.5654	1.6132	1.5519	1.46	1.6073	1.2554	1.055	1.1408	1.4343	1.4743	1.474	0.7007	0.6643	1.0501	0.8641	0.8863	0.8764	0.9274	0.9663	1.0337	0.7599	0.7147	0.6604	0.6792	0.6342	0.5743	0.7261	0.6228
865	25	52690	LC/MS Neg	100009082	5483	433.236				HMDB07856		Lipids	Phospholipids	1-linoleoyl-GPA (18:2)*	1.3301	0.9998	0.7953	0.931	3.2897	1.9567	2.3924	1.8811	1.0621	0.9955	0.6882	0.6894	0.4482	1.5955	1.4503	2.0135	1.4269	1.9002	1.0002	1.9637	3.2117	4.6196	0.8037	0.6503	0.4548	0.5461	0.4946	0.6952	0.6124	0.637
866	37	52453	LC/MS Pos Late	100008981	2165	784.585						Lipids	Phospholipids	1-oleoyl-2-linoleoyl-GPC (18:1/18:2)*	1.0447	0.9692	1.0308	1.0921	2.1502	2.1416	2.2396	0.8852	0.7234	0.8694	1.2284	1.2309	1.2513	1.7558	1.4445	2.167	0.8567	0.9074	0.886	1.954	1.9562	2.1792	0.1863	0.1101	0.135	0.1404	0.128	0.1215	0.1176	0.0964
867	38	52687	LC/MS Pos Late	100009078	2270	742.538		9546753		HMDB05349		Lipids	Phospholipids	1-oleoyl-2-linoleoyl-GPE (18:1/18:2)*	1.0638	0.9988	1.0012	1.1285	2.7161	2.794	2.8826	0.7522	0.6476	0.7305	1.3565	1.342	1.3907	2.1726	1.8172	2.7182	0.8385	0.9792	0.9084	1.9248	2.0459	1.997	0.4	0.2868	0.3107	0.343	0.2457	0.2159	0.2812	0.2623
869	49	52694	LC/MS Pos Late	100009089	2526	688.491						Lipids	Phospholipids	1-palmitoyl-2-linolenoyl-GPA (16:0/18:3)*	0.9331	0.9254	0.8879	0.9288	1.1596	1.2434	1.218	0.9241	0.878	0.9921	1.0079	1.0435	1.0784	0.6318	0.9659	0.8262	0.745	0.7674	0.8209	0.8826	1.0407	0.9503	1.8096	1.7775	1.7779	1.4944	1.0797	1.0539	1.4001	1.1309
870	46	52684	LC/MS Pos Late	100009076	2034	756.554						Lipids	Phospholipids	1-palmitoyl-2-alpha-linolenoyl-GPC (16:0/18:3n3)*	0.6221	0.597	0.7229	0.6719	1.1503	1.4044	1.0192	1.1486	0.7385	0.9047	0.8918	1.0228	0.9808	1.629	1.3999	1.7388	0.6887	0.7699	0.7668	1.4996	1.4751	1.8673	2.3387	1.1397	1.1275	1.2006	0.7504	0.7602	0.8222	0.6572
871	50	52678	LC/MS Pos Late	100009073	2520	762.528						Lipids	Phospholipids	1-palmitoyl-2-linolenoyl-GPG (16:0/18:3)*	0.7674	0.8207	1.1082	1.3561	2.7394	2.6803	1.4353	1.4101	0.7984	0.8918	1.5798	1.651	1.1096	2.6827	2.268	3.034	0.6976	0.7494	0.6932	2.0158	1.3411	2.047	0.5775	0.4028	0.4439	0.3925	0.397	0.4215	0.3684	0.2902
872	53	52679	LC/MS Pos Late	100009070	2820	690.507		9547167		HMDB07860		Lipids	Phospholipids	1-palmitoyl-2-linoleoyl-GPA (16:0/18:2)*	1.1033	1.0549	1.008	1.0691	0.9658	0.992	1.1565	0.9793	0.91	1.052	1.1757	1.076	1.1535	0.8415	0.7219	0.8728	1.0804	1.0769	1.0626	1.1541	1.0805	1.0774	0.198	0.1872	0.1824	0.1712	0.2105	0.2033	0.1641	0.2291
874	62	52669	LC/MS Pos Late	100009066	3140	854.575						Lipids	Phospholipids	1-palmitoyl-2-oleoyl-GPI (16:0/18:1)*	1.0063	0.9766	0.9695	0.9937	1.9039	1.9852	2.0582	1.0492	0.9306	1.0546	1.2626	1.1953	1.1226	1.2784	1.1012	1.5283	0.8055	0.8489	0.8081	1.0717	1.0907	1.1001	0.0586	0.0432	0.0372	0.034	0.0846	0.067	0.0622	0.0633
875	69	52452	LC/MS Pos Late	100008980	2380	786.601						Lipids	Phospholipids	1-stearoyl-2-linoleoyl-GPC (18:0/18:2)*	1.0077	0.9462	0.9735	1.0571	0.7291	0.8954	0.9123	1.0124	0.7812	0.9923	1.3118	1.1467	1.2185	1.4112	1.1442	1.8183	1.1129	1.2742	1.2543	1.6871	1.8146	1.8207	0.0454	0.0353	0.041	0.0406	0.0059	0.0087	0.0098	0.0084
876	70	52446	LC/MS Pos Late	100008976	2522	744.554		9546749				Lipids	Phospholipids	1-stearoyl-2-linoleoyl-GPE (18:0/18:2)*	1.0082	1.0144	0.9887	1.0073	0.8477	0.8849	0.9543	0.9927	0.8349	0.8803	1.2603	1.2221	1.3003	1.6414	1.3867	1.9272	1.2318	1.4413	1.4439	1.924	1.9687	2.2026	0.1147	0.0952	0.1121	0.0974	0.0531	0.0541	0.0686	0.0588
877	72	52438	LC/MS Pos Late	100008904	2644	788.616	56421-10-4					Lipids	Phospholipids	1-stearoyl-2-oleoyl-GPC (18:0/18:1)	0.9892	0.9419	0.9653	1.1025	2.1014	1.956	2.1524	0.8967	0.7747	0.9522	1.1677	1.1357	1.2119	1.2695	1.066	1.5012	0.8858	1.0228	1.0108	1.519	1.4879	1.5589	0.0437	0.0358	0.0376	0.0359	0.0397	0.0379	0.0341	0.0449
878	235	48857	LC/MS Polar	100001619	2430	245.043		439964	C03274			Lipids	Phospholipids	glycerophosphoglycerol	0.7756	0.9006	0.8322	0.8218	1.0473	1.0192	1.0332	1.0348	0.9745	0.8377	0.4533	0.4738	0.4714	1.0696	1	0.983	1.092	1.1666	1.1473	1.0776	1.1239	1.1509	0.0001	0.0001	0.0001	0.0001	0.0001	0.0001	0.0001	0.0001
881	61	52448	LC/MS Pos Late	100000641	3206	766.559		5283509				Lipids	Phospholipids	1-palmitoyl-2-oleoyl-GPG (16:0/18:1)	0.9447	0.9267	0.9112	0.9428	2.3666	2.2198	2.3347	0.9884	0.954	0.9724	1.1388	1.1032	1.0578	1.5745	1.3887	1.6492	1.0116	1.0487	1.0576	1.2448	1.3401	1.3014	0.0674	0.0488	0.0535	0.0495	0.0714	0.0638	0.0602	0.0522
883	11	52457	LC/MS Pos Late	100008905	2346	786.601	4235-95-4	10350317				Lipids	Phospholipids	1,2-dioleoyl-GPC (18:1/18:1)*	0.9185	0.8835	0.6615	0.9254	4.5935	3.4622	5.0174	0.9354	1.0953	1.0646	0.8628	0.9197	1.1328	1.2861	1.1695	1.438	1.4699	1.7384	1.6757	1.825	1.6266	1.7938	0.1755	0.115	0.1146	0.1227	0.614	0.578	0.5564	0.4998
884	344	46798	LC/MS Pos Late	100002989	3115	636.556	106292-55-1					Lipids	Phospholipids	oleoyl-linoleoyl-glycerol (18:1/18:2) [1]	1.1676	1.3258	1.1917	1.1462	2.6381	2.6901	2.6581	0.5511	0.4114	0.4469	1.5407	1.4557	1.5392	1.039	0.9967	1.2314	0.392	0.3164	0.3655	0.8366	0.9768	0.9571	1.3119	1.347	1.0033	0.7593	0.6887	0.5839	0.8928	0.8673
885	77	34437	LC/MS Neg	100001462	5816	511.304						Lipids	Phospholipids	1-stearoyl-GPG (18:0)	1.7175	1.1934	0.5794	0.5622	3.7008	2.2562	2.9133	0.6366	1.0045	0.6095	0.6447	0.7902	0.6187	0.9393	1.2375	1.2939	0.9955	1.0932	0.6133	0.7771	1.326	1.1798	0.5622	0.5622	0.5622	0.5622	0.5622	0.5622	0.5622	0.5622
887	167	15506	LC/MS Pos Early	1256	1961	104.107	67-48-1	305	C00114	HMDB00097	CHOLINE	Lipids	Phospholipids	choline	0.9585	0.9913	0.944	0.9552	1.0843	1.0939	1.1066	1.0087	1.036	1.014	0.9177	0.8953	0.9199	1.0639	1.0772	1.0554	1.0672	1.0547	1.0499	1.1597	1.1786	1.1491	0.4918	0.4721	0.4596	0.4578	0.4541	0.4735	0.4569	0.4382
888	168	34396	LC/MS Pos Early	267	700	184.073	72556-74-2	1014	C00588	HMDB01565	PHOSPHORYL-CHOLINE	Lipids	Phospholipids	choline phosphate	1.0132	1.0396	1.0346	0.9868	0.8892	0.8757	0.858	1.7637	1.6103	1.5808	1.2581	1.2954	1.3391	0.8105	0.8215	0.8054	2.8044	2.7565	2.8921	2.0762	2.1253	2.237	0.518	0.4474	0.441	0.4381	0.3193	0.3603	0.3297	0.3035
889	195	1497	LC/MS Pos Early	420	1935	123.113	141-43-5	700	C00189	HMDB00149	ETHANOL-AMINE	Lipids	Phospholipids	ethanolamine	1.2031	1.2919	1.3303	1.2175	2.0081	2.0261	1.915	1.1666	1.233	1.066	1.0066	0.9458	1.012	0.6798	0.7413	0.2733	1.0753	1.0029	0.9971	0.9842	0.9893	1.1396	0.5627	0.5549	0.4568	0.4206	0.4446	0.5918	0.4929	0.4177
890	4	53179	LC/MS Pos Late	100009344	1800	778.538						Lipids	Phospholipids	1,2-dilinolenoyl-GPC (18:3/18:3)*	0.6329	0.4826	0.6133	0.5905	1.021	1.0794	1.0221	0.9541	0.694	0.8295	0.979	1.0936	1.1753	1.5047	1.1624	2.5618	0.7216	0.6338	0.6062	1.7039	1.6031	1.9385	1.7611	1.0219	1.1903	1.3135	0.9518	0.8261	0.8533	0.6682
891	8	53174	LC/MS Pos Late	100009217	2083	740.522		9546812				Lipids	Phospholipids	1,2-dilinoleoyl-GPE (18:2/18:2)*	0.9726	0.9267	0.9392	0.9393	1.1852	1.1475	1.2699	0.8835	0.6834	0.8029	1.1874	1.2051	1.3224	1.9096	1.6387	2.5541	1.0274	1.2008	1.1648	2.2118	2.253	2.3328	0.2191	0.1637	0.1806	0.1804	0.1583	0.1357	0.1585	0.1618
894	23	53176	LC/MS Pos Late	100009343	1939	780.554						Lipids	Phospholipids	1-linoleoyl-2-linolenoyl-GPC (18:2/18:3)*	0.9524	0.8677	1.0275	1.0077	1.0841	1.0379	1.0283	1.1564	0.8188	0.9923	1.1587	1.2948	1.295	2.0157	1.5511	2.9644	0.9326	0.9553	0.9605	2.0883	2.0647	2.2894	0.2173	0.1136	0.1427	0.1515	0.1655	0.1603	0.1603	0.1242
899	73	42448	LC/MS Pos Late	100001856	2858	746.569						Lipids	Phospholipids	1-stearoyl-2-oleoyl-GPE (18:0/18:1)	1.0927	0.9212	1.1292	0.9879	2.1756	2.2669	1.6928	1.0445	0.7865	0.8364	1.0585	1.5125	1.0601	1.9662	1.6488	1.5417	0.7554	0.8289	0.8506	1.1825	1.0121	1.7361	0.0625	0.0687	0.0698	0.0685	0.0652	0.0388	0.0427	0.0498
900	12	52609	LC/MS Pos Late	100008906	2485	744.554	4004-05-01	9546757				Lipids	Phospholipids	1,2-dioleoyl-GPE (18:1/18:1)	0.8189	0.7066	0.5406	0.7633	5.2682	5.0586	5.3202	0.6946	0.8949	0.9853	1.2903	1.379	1.3365	1.6168	1.6545	1.7734	1.3218	1.3543	1.1934	1.0147	1.3571	1.0354	0.2413	0.168	0.1675	0.2117	0.8893	0.8163	0.8418	0.7957
902	9	52734	LC/MS Pos Late	100009185	2388	876.56						Lipids	Phospholipids	1,2-dilinoleoyl-GPI (18:2/18:2)*	1.0139	0.9861	0.9462	1.03	0.5028	0.4198	0.3965	0.7469	0.8196	0.8259	1.0641	0.9828	0.9789	1.3868	1.3165	1.5783	0.972	1.2218	1.0892	1.5154	1.6096	1.5202	0.3965	0.3965	0.3965	0.3965	0.3965	0.3965	0.3965	0.3965
913	13	52619	LC/MS Pos Late	100008908	3121	880.591						Lipids	Phospholipids	1,2-dioleoyl-GPI (18:1/18:1)	1.2678	1.102	0.9966	1.0034	3.3036	3.0569	3.1021	0.9037	0.7219	0.9339	1.5937	1.4464	1.6268	1.5165	1.0552	1.9518	0.8277	0.9641	0.7209	1.121	1.2743	1.1152	0.0388	0.0313	0.0284	0.016	0.2719	0.2443	0.2385	0.2335
914	58	19262	LC/MS Pos Late	1535	3293	692.522		5283523	C13889			Lipids	Phospholipids	1-palmitoyl-2-oleoyl-GPA (16:0/18:1)	1.3824	1.3189	1.2975	1.4183	1.891	1.9233	1.7918	0.9626	1.0235	1.0913	1.2792	1.2272	1.2609	0.9332	0.6204	0.7102	1.0158	1.036	0.9842	0.8721	0.9711	1.0623	0.1095	0.1067	0.0935	0.1198	0.2111	0.1362	0.0723	0.1829
915	35	52733	LC/MS Pos Late	100009180	2409	876.56						Lipids	Phospholipids	1-oleoyl-2-linolenoyl-GPI (18:1/18:3)*	0.5639	0.5639	0.5639	0.5639	2.0881	2.2182	2.39	0.5639	0.5639	0.5639	0.5639	0.5639	0.5639	0.5639	0.5639	0.5639	0.5639	0.5639	0.5639	0.5639	0.5639	0.5639	0.7332	0.5932	0.633	0.5639	1.1457	1	1.0658	0.8016
918	71	52468	LC/MS Pos Late	100008994	3185	880.591						Lipids	Phospholipids	1-stearoyl-2-linoleoyl-GPI (18:0/18:2)	1.0109	1.0066	0.9384	1.0339	0.9795	0.9684	1.0444	0.8445	0.8477	0.9011	1.109	1.1008	1.0465	1.0281	0.9934	1.112	1.2945	1.3163	1.2637	1.4416	1.5067	1.5198	0.036	0.0269	0.0338	0.019	0.0579	0.052	0.0454	0.0413
921	3	57329	LC/MS Pos Late	100009117	2100	710.476		9547161				Lipids	Phospholipids	1,2-dilinolenoyl-GPA (18:3/18:3)*	0.8638	0.9157	0.8919	0.9156	1.2488	1.2007	1.198	1.0089	0.6876	0.8515	0.9911	1.1806	1.1974	0.3856	1.157	0.8924	0.5018	0.4791	0.6447	0.5674	0.8384	0.7814	6.8967	6.7979	6.8533	6.0327	4.5372	4.2678	5.2005	3.8717
922	10	19137	LC/MS Pos Late	100000634	3203	718.538						Lipids	Phospholipids	1,2-dioleoyl-GPA (18:1/18:1)*	1.3364	1.2879	1.2087	1.6944	3.8289	3.8623	3.5377	0.799	0.9738	0.9802	1.3744	1.1491	1.3383	1.1165	0.5388	0.6327	1.4453	1.4398	1.3706	0.9204	0.9518	1.0198	0.1405	0.1112	0.1105	0.1667	0.2885	0.1611	0.1179	0.22
923	36	57348	LC/MS Pos Late	100009093	2800	716.522						Lipids	Phospholipids	1-oleoyl-2-linoleoyl-GPA (18:1/18:2)*	1.4886	1.4264	1.3677	1.5837	2.6151	2.6894	2.7862	0.891	0.9243	1.0467	1.5365	1.4559	1.552	1.0016	0.7728	0.9426	0.9984	0.9612	0.9689	1.1216	1.0424	1.0626	0.3311	0.3128	0.265	0.2547	0.3394	0.2567	0.3026	0.3121
924	34	57350	LC/MS Pos Late	100015599	2522	714.507						Lipids	Phospholipids	1-oleoyl-2-linolenoyl-GPA (18:1/18:3)	0.8668	0.8668	0.8668	0.8668	0.8668	0.8668	0.8668	0.8668	0.8668	0.8668	0.8668	0.8668	0.8668	0.8668	0.8668	0.8668	0.8668	0.8668	0.8668	0.8668	0.8668	0.8668	1.0473	1.0022	1.0077	0.9363	0.9978	0.8668	0.9384	1.0604
925	68	57347	LC/MS Pos Late	100009091	3259	718.538				HMDB07861		Lipids	Phospholipids	1-stearoyl-2-linoleoyl-GPA (18:0/18:2)*	1.3944	1.3819	1.3644	1.2923	1.0136	1.001	1.0555	0.9019	0.9876	1.1136	1.3167	1.2792	1.4038	0.7175	0.5087	0.6692	1.339	1.2846	1.263	0.9682	0.999	1.1677	0.0736	0.1023	0.088	0.0791	0.1756	0.1498	0.0771	0.2093
932	365	1510	LC/MS Pos Late	469	1367	318.3	554-62-1	122121	C12144	HMDB04610	PHYTOSPINGOSINE	Lipids	Sphingolipid	phytosphingosine	0.7554	0.6578	0.816	0.7536	3.7749	4.1947	3.8064	1.1982	1.0714	1.1283	1.3797	1.3327	1.5144	1.3869	1.2628	1.4447	0.5783	0.6465	0.6022	0.9649	1.0351	1.1454	1.1857	0.8227	0.7413	0.6864	0.5312	0.5779	0.6257	0.7422
933	398	17769	LC/MS Pos Late	313	1413	302.305	3102-56-5	3126	C00836	HMDB00269	DIHYDRO-SPHINGOSINE	Lipids	Sphingolipid	sphinganine	0.7831	0.7831	0.7831	0.7831	0.7831	0.7831	0.7831	0.7831	0.7831	0.7831	0.7831	0.7831	0.7831	0.7831	0.7831	0.7831	0.7831	0.7831	0.7831	0.7831	0.7831	0.7831	1.2734	1.3549	1.0777	1.2041	0.9223	0.8211	0.9075	0.7831
945	161	27414	LC/MS Pos Late	100001033	3054	397.383	83-46-5	222284	C01753	HMDB00852	CPD-4143	Lipids	Sterols	beta-sitosterol	0.9331	0.7986	0.9978	0.8855	1.3259	1.4643	1.3759	1.0022	1.0808	1.0833	0.8472	0.912	0.8674	1.271	1.1557	1.3017	1.3643	1.4082	1.2193	1.2178	1.194	1.4991	0.7868	0.4918	0.4938	0.4385	0.5685	0.5114	0.8249	0.3659
948	163	33997	LC/MS Pos Late	100001269	2873	383.367	474-62-4	173183	C01789	HMDB02869	CPD-707	Lipids	Sterols	campesterol	0.8384	0.841	0.8679	0.841	1.2191	1.2972	1.3206	1.1569	1.1888	1.1681	0.8575	0.8435	0.7402	1.3127	1.1321	1.241	1.4044	1.3613	1.2445	1.1324	1.3501	1.302	0.0843	0.048	0.0474	0.037	0.0539	0.0527	0.0701	0.0242
957	403	21183	LC/MS Pos Late	100000923	2875	395.367	83-48-7	5280794	C05442	HMDB00937	CPD-4162	Lipids	Sterols	stigmasterol	0.8063	0.8064	0.7701	0.7952	1.3027	1.2934	1.3948	1.0171	1.0155	0.9543	0.651	0.588	0.7242	1.6082	1.6291	1.3466	1.3076	1.2492	0.9845	1.3545	1.5977	1.6676	0.7068	0.5434	0.741	0.5434	0.5434	0.5434	0.7687	0.5434
1004	81	43761	LC/MS Pos Early	100004542	3160	146.118	1115-90-8	227939				Lipids	Fatty acid, Amino	2-aminoheptanoate	0.852	0.963	0.8952	1.0228	2.339	2.6568	2.7804	0.9317	0.9772	0.7718	1.0458	1.0801	1.4192	1.5551	1.5172	1.7472	1.4827	1.3953	1.3588	1.0651	1.2089	0.8797	0.4815	0.4683	0.4198	0.4292	0.1381	0.2733	0.1966	0.3791
1010	156	18362	LC/MS Neg	2029	1276	187.098	123-99-9	2266	C08261	HMDB00784		Lipids	Fatty acid, Dicarboxylate	azelate (nonanedioate)	0.9851	0.9968	1.0277	1.1453	2.4334	2.8301	2.125	1.0824	0.9955	0.8859	0.9528	1.0512	0.9964	1.3334	1.2925	1.1256	0.9838	1.1356	1.0032	1.3195	1.5135	1.4045	0.2711	0.2499	0.2839	0.2402	0.2099	0.2537	0.2036	0.181
1013	287	15872	LC/MS Neg	818	612	103.004	141-82-2;26522-22-85-0	867	C00383	HMDB00691	MALONATE	Lipids	Fatty acid, Dicarboxylate	malonate	0.9553	1.0478	1	1	1.1955	1.1713	1.2573	0.9903	0.8791	1.0068	1.1735	1.1665	1.2166	0.6554	0.586	0.634	1.3144	1.2954	1.3601	1.4259	1.4229	1.362	0.9748	0.8399	0.8564	0.809	0.7536	0.789	0.7233	0.7
1014	366	15704	LC/MS Polar	100000101	2745	159.066	111-16-0	385	C02656	HMDB00857	CPD-205	Lipids	Fatty acid, Dicarboxylate	pimelate (heptanedioate)	0.8247	0.781	0.7871	0.6989	1.5451	1.1753	1.2475	1.8756	1.6478	1.5154	0.7001	0.5497	0.5535	29.649	27.1058	27.9029	4.507	4.9738	4.6372	1.8666	2.0709	1.9303	0.5556	0.4459	0.4516	0.4122	0.3435	0.3383	0.3318	0.3237
1016	404	15730	LC/MS Polar	100000016	2577.6	173.082	505-48-6	10457	C08278	HMDB00893	CPD0-1264	Lipids	Fatty acid, Dicarboxylate	suberate (octanedioate)	0.9184	1.1111	0.8471	1.1978	2.3669	2.3981	2.2731	1.1285	1.434	1.1115	0.9436	1.0468	0.903	0.9009	1.1915	0.8279	1.0026	0.9974	0.7202	1.0185	0.7643	0.8502	0.6854	0.6936	0.817	0.7239	0.9134	1.0317	1.0471	1.0814
1022	230	396	LC/MS Polar	339	2900	131.035	110-94-1	743	C00489	HMDB00661	GLUTARATE	Lipids	Fatty acid, Dicarboxylate	glutarate (pentanedioate)	0.9999	1.0598	1.0001	1.0121	0.0826	0.0826	0.0826	1.1796	1.1958	1.1187	0.0826	0.0826	0.0826	1.1492	1.0546	0.9662	0.9597	1.1157	0.9922	1.5338	1.6303	1.5624	0.1511	0.1511	0.1382	0.0986	0.104	0.1027	0.1061	0.0826
1024	136	21134	LC/MS Polar	100000863	3000	145.051	124-04-9	196	C06104	HMDB00448	ADIPATE	Lipids	Fatty acid, Dicarboxylate	adipate	0.5509	1.1142	0.8713	0.795	2.6788	2.9071	2.5701	1.3291	1.5259	0.759	1.5735	0.7027	1.2903	0.8848	0.9831	1.3945	0.8649	0.7862	0.9392	1.3729	1.4002	1.3435	0.7858	0.661	1.0237	0.6736	0.8099	1.0169	1.1594	0.577
1026	416	42964	LC/MS Neg	100004226	2833	227.129	6402-36-4	5283028	C16308	HMDB00933		Lipids	Fatty acid, Dicarboxylate	traumatic acid	1.7153	1.9329	1.8006	1.95	10.729	12.1576	11.7204	1.1535	1.0308	1.023	2.5811	2.3337	2.1848	1.079	0.9451	0.977	0.6931	0.8431	0.6544	0.9306	1.1631	0.9477	0.2097	0.1942	0.1604	0.1646	0.0487	0.056	0.0462	0.044
1032	1	54892	LC/MS Pos Late	100009392	1941	954.615						Lipids	Galactolipids	1,2-dilinolenoyl-digalactosylglycerol (18:3/18:3)	0.9926	1.0028	1.2406	1.0652	1.7731	1.7088	1.586	1.0506	0.7161	0.7935	1.2599	1.459	1.3126	1.3751	1.1361	1.6454	0.6955	0.7517	0.7426	1.0716	0.9972	1.3224	0.8456	0.796	0.7668	0.5982	0.8013	0.8229	0.7504	0.6892
1034	20	54896	LC/MS Pos Late	100010872	2073	956.63					GLYCOLIPID DESATURATION	Lipids	Galactolipids	1-linoleoyl-2-linolenoyl-digalactosylglycerol (18:2/18:3)*	0.969	0.9086	1.4067	1.018	1.7201	1.6541	1.2699	1.3515	0.8103	0.8798	1.5507	2.1916	1.5574	1.0501	0.9086	0.8733	1.1954	1.2357	0.982	1.1063	1.0765	1.817	0.5584	0.5249	0.4408	0.3963	0.5614	0.5042	0.4389	0.4223
1035	51	54887	LC/MS Pos Late	100010874	2498	934.646					GLYCOLIPID DESATURATION	Lipids	Galactolipids	1-palmitoyl-2-linoleoyl-digalactosylglycerol (16:0/18:2)*	0.7869	0.8138	0.8292	0.8872	1.2777	1.3595	1.215	1.0818	1.0783	1.1241	1.3896	1.3697	1.3407	0.9015	0.8837	0.9217	1.3166	1.453	1.2801	1.5214	1.5529	1.5136	0.1253	0.1126	0.0986	0.0909	0.0973	0.0815	0.1012	0.0732
1036	2	54891	LC/MS Pos Late	100010877	2046	792.562		5282287	C13871			Lipids	Galactolipids	1,2-dilinolenoyl-galactosylglycerol (18:3/18:3)*	1.346	1.2566	0.9437	1.4305	1.0375	1.0415	1.5847	0.7903	0.8804	1.0339	1.712	1.0102	1.6366	0.713	0.6012	2.2813	0.9926	0.8247	0.8714	1.4931	1.456	0.9884	0.5333	0.6084	0.5685	0.466	1.0022	1.0755	0.9978	0.8441
1037	5	54899	LC/MS Pos Late	100010879	2415	796.593		6535011				Lipids	Galactolipids	1,2-dilinoleoyl-galactosylglycerol (18:2/18:2)*	0.8227	0.8215	0.7861	0.8889	1.03	0.9835	1.1806	0.6948	0.6977	0.8075	1.5658	1.3962	1.6002	0.6939	0.6079	1.0713	1.0189	1.0753	1.0418	1.0165	1.0635	0.8682	0.6079	0.6079	0.6079	0.6079	0.6079	0.6079	0.6079	0.6079
1040	21	54898	LC/MS Pos Late	100010878	2209	794.578						Lipids	Galactolipids	1-linoleoyl-2-linolenoyl-galactosylglycerol (18:2/18:3)*	1.1517	1.0827	0.8143	1.2787	0.8186	0.7172	1.3912	0.9005	0.8971	1.0223	1.8149	1.2234	1.7619	0.5568	0.474	1.3928	1.2203	1.2579	1.2056	1.4624	1.3735	1.0623	0.4801	0.4333	0.3922	0.4026	0.9777	0.8929	0.9498	0.6075
1041	47	54893	LC/MS Pos Late	100010875	2278	932.63					GLYCOLIPID DESATURATION	Lipids	Galactolipids	1-palmitoyl-2-linolenoyl-digalactosylglycerol (16:0/18:3)	0.9233	0.9279	1.0024	0.9927	1.6909	1.5717	1.6256	1.0597	0.952	0.9976	1.3526	1.4138	1.3416	1.9051	1.7886	2.028	0.9789	1.0726	0.9651	1.523	1.6406	1.8044	0.5344	0.4626	0.4163	0.3994	0.2987	0.2843	0.293	0.246
1042	48	54900	LC/MS Pos Late	100010894	2455	770.578					GLYCOLIPID DESATURATION	Lipids	Galactolipids	1-palmitoyl-2-linolenoyl-galactosylglycerol (16:0/18:3)*	0.5999	0.5697	0.4386	0.495	1.2609	0.9962	1.0365	0.6631	0.4668	0.5985	0.963	1.0812	1.0038	1.4242	1.2659	1.4466	0.4845	0.5392	0.4858	0.9925	0.9928	0.9771	2.8872	2.5835	3.0356	2.5007	2.5541	2.341	2.7291	1.7259
1043	52	54901	LC/MS Pos Late	100010893	2731	772.593						Lipids	Galactolipids	1-palmitoyl-2-linoleoyl-galactosylglycerol (16:0/18:2)*	0.938	0.9843	0.8193	0.6806	1.733	1.9463	2.1403	1.1912	1.0157	0.9648	1.9641	2.293	2.4765	0.9598	1.1892	1.871	1.0853	1.2331	1.0889	1.6495	1.8337	0.8742	0.3758	0.2966	0.2827	0.1592	0.4269	0.4679	0.4984	0.3537
1044	33	57352	LC/MS Pos Late	100015601	2448	796.593						Lipids	Galactolipids	1-oleoyl-2-linolenoyl-galactosylglycerol (18:1/18:3)*	0.78	0.78	0.78	0.78	0.78	0.78	0.78	0.78	0.78	0.78	0.78	0.78	0.78	0.78	0.78	0.78	0.78	0.78	0.78	0.78	0.78	0.78	0.9858	0.8295	0.8188	0.78	1.6106	1.5836	1.7771	1.0142
1045	185	57346	LC/MS Neg	100003065	781	415.146						Lipids	Galactolipids	digalactosylglycerol*	0.9059	0.9592	0.9257	1.0414	1.3482	1.417	1.3855	0.98	1.0014	0.9474	1.0229	0.925	0.9986	1.2425	1.1699	1.1767	1.0454	1.0515	1.0413	1.2576	1.3697	1.4177	0.1242	0.1338	0.109	0.105	0.1282	0.1369	0.1208	0.1229
1046	204	57345	LC/MS Polar	100003064	2518	299.098	16232-91-0	16048618				Lipids	Galactolipids	galactosylglycerol*	0.7312	0.7526	0.7336	0.7513	1.3384	1.3534	1.28	1.4431	1.3384	1.2215	0.8539	0.8944	0.8796	1.5219	1.4503	1.4435	1.1056	1.1269	1.106	1.4471	1.5634	1.5596	0.0833	0.074	0.0765	0.0632	0.1057	0.1114	0.1101	0.0896
1050	359	1508	LC/MS Neg	1024	1498.7	218.103	137-08-6	6613	C00864	HMDB00210	PANTOTHENATE	Cofactors, Prosthetic Groups, Electron Carriers	CoA metabolism	pantothenate	0.9625	1.0618	1.0375	1.3148	0.7083	0.8076	0.7623	1.3243	1.5372	1.3861	0.6197	0.5435	0.5611	1.3539	1.4267	1.3905	1.5556	1.7341	1.4842	1.4122	1.4299	1.1911	0.0386	0.0353	0.0321	0.028	0.0482	0.0578	0.0519	0.0461
1057	330	594	LC/MS Pos Early	432	1942	123.055	98-92-0	936	C00153	HMDB01406	NIACINAMIDE	Cofactors, Prosthetic Groups, Electron Carriers	Nicotinate and nicotinamide metabolism	nicotinamide	1.2735	1.4254	1.0807	1.401	1.0276	1.053	1.3663	0.9791	1.1253	1.1803	1.1206	0.8634	1.0518	0.8868	0.8731	1.1556	0.9853	0.9475	1.0147	1.0488	1.063	0.8308	0.3025	0.2988	0.3085	0.2983	0.1026	0.1137	0.123	0.1451
1058	331	5278	LC/MS Neg	1310	1434	662.102	53-84-9	5893	C00003	HMDB00902	NAD	Cofactors, Prosthetic Groups, Electron Carriers	Nicotinate and nicotinamide metabolism	nicotinamide adenine dinucleotide (NAD+)	0.9517	0.991	0.7988	0.9931	2.028	2.5022	1.9237	1.1501	1.0069	1.0385	0.8808	0.8455	0.8955	1.5855	1.3894	1.5032	1.2962	1.3463	1.2111	1.5701	1.9135	1.6605	0.82	0.7351	0.7065	0.6189	0.9033	0.8933	0.7726	0.8012
1062	332	22152	LC/MS Pos Early	1312	766	335.064	1094-61-7	14180	C00455	HMDB00229	NICOTINAMIDE_NUCLEOTIDE	Cofactors, Prosthetic Groups, Electron Carriers	Nicotinate and nicotinamide metabolism	nicotinamide ribonucleotide (NMN)	0.9626	0.9632	0.8906	0.9284	1.492	1.5573	1.5791	0.9916	0.9786	0.892	1.0084	1.0319	1.0593	1.0888	1.0912	1.145	1.1568	1.17	1.1772	1.3912	1.5302	1.3841	0.4036	0.3606	0.366	0.3665	0.272	0.2759	0.2608	0.264
1063	333	33013	LC/MS Pos Early	100001310	2040	255.098	1341-23-7	439924	C03150	HMDB00855	NICOTINAMIDE_RIBOSE	Cofactors, Prosthetic Groups, Electron Carriers	Nicotinate and nicotinamide metabolism	nicotinamide riboside	1.1894	1.2603	1.3479	1.2044	1.1365	1.0925	0.9297	1.4661	1.2641	1.2756	0.7104	0.8273	0.7521	1.1942	1.2019	1.0554	0.9784	0.9998	0.993	1.0002	1.0307	1.2211	0.0177	0.0184	0.0145	0.0133	0.0072	0.0097	0.0079	0.0064
1064	334	1504	LC/MS Neg	567	1180	122.025	59-67-6	938	C00253	HMDB01488	NIACINE	Cofactors, Prosthetic Groups, Electron Carriers	Nicotinate and nicotinamide metabolism	nicotinate	0.8746	0.9333	0.9446	1.2054	2.5065	2.8875	2.5901	0.9467	0.8321	0.9322	0.9086	1.0186	0.9365	1.4283	1.3286	1.3308	0.9505	1.5735	1.1967	1.2763	1.4322	1.0661	1.0349	1.0063	0.8203	0.9937	0.7269	0.6511	0.98	0.7325
1066	335	33471	LC/MS Pos Early	100001316	1536	256.082	2625-49-2	161234	C05841	HMDB06809	NICOTINAMIDE_RIBOSE	Cofactors, Prosthetic Groups, Electron Carriers	Nicotinate and nicotinamide metabolism	nicotinate ribonucleoside	0.9768	1.0426	1.0143	0.9857	0.7515	0.7268	0.8395	1.1666	1.2055	1.1834	0.982	0.888	1.0727	1.0589	1.0809	1.1954	1.6091	1.517	1.5125	1.3913	1.4136	1.3663	0.2236	0.2007	0.1789	0.1828	0.3431	0.3861	0.3589	0.2907
1067	417	32401	LC/MS Pos Early	100001092	1388	138.055	535-83-1	5570	C01004	HMDB00875	METHYLNICOTINATE	Cofactors, Prosthetic Groups, Electron Carriers	Nicotinate and nicotinamide metabolism	trigonelline (N'-methylnicotinate)	1.1767	1.1982	1.2193	1.1785	0.9888	1.0272	0.9888	1.0477	0.9971	0.9956	1.0029	1.0578	1.0972	0.9818	0.9535	0.9517	1.4063	1.367	1.395	1.0775	1.1103	1.1301	0.0392	0.0335	0.034	0.0344	0.0575	0.0632	0.0563	0.0491
1080	371	43023	LC/MS Neg	100004216	1370	162.042	22363-60-4	73000	C00715	HMDB00802		Cofactors, Prosthetic Groups, Electron Carriers	Folate Metabolism	pterin	0.5485	0.3719	0.3719	0.5657	1.3253	1.7077	1.6842	0.7827	0.6663	0.6199	0.3719	0.3719	0.3719	1.0378	0.899	1	0.3719	0.3719	0.3719	0.8591	1.1423	0.8679	2.3207	2.0448	2.0574	2.0319	0.3719	0.3719	0.3719	0.3719
1083	295	37070	LC/MS Pos Early	100001805	544	113	7023-27-0	13130		HMDB61711		Cofactors, Prosthetic Groups, Electron Carriers	Oxidative phosphorylation	methylphosphate	1.3173	1.4758	1.3679	1.2554	1.8259	1.9653	2.1579	0.3153	1.519	1.3315	1.0968	1.0782	1.0144	0.8362	1.0857	0.2549	1.3954	0.9228	0.8163	0.9633	0.9856	1.1806	0.5146	0.65	0.5194	0.3873	0.3694	0.3449	0.3584	0.3061
1084	362	42109	LC/MS Pos Early	461	576	98.9842	7664-38-2	1061	C00009	HMDB01429	Pi	Cofactors, Prosthetic Groups, Electron Carriers	Oxidative phosphorylation	phosphate	0.9811	1.0189	0.9464	0.957	1.7836	1.6469	1.7405	1.0284	1.0433	0.9777	1.0425	1.0279	1.0796	0.7964	0.8196	0.8319	1.3217	1.2891	1.2762	1.3458	1.343	1.377	0.3812	0.3363	0.3322	0.3418	0.4114	0.4803	0.4525	0.415
1089	196	2134	LC/MS Neg	327	2425	784.15	146-14-5;84366-81-4	643975	C00016	HMDB01248	FAD	Cofactors, Prosthetic Groups, Electron Carriers	Riboflavin and FAD metabolism	flavin adenine dinucleotide (FAD)	0.8691	0.8991	0.7482	0.9136	1.4345	1.7381	1.5476	1.1696	1.143	1.0266	0.9175	0.8395	0.9734	1.2281	1.2405	1.3753	1.0594	1.3918	1.1475	1.3555	1.3934	1.4236	0.4232	0.4568	0.3947	0.3237	0.3116	0.336	0.2897	0.2766
1090	381	1827	LC/MS Pos Early	500	2292	377.146	83-88-5	493570	C00255	HMDB00244	RIBOFLAVIN	Cofactors, Prosthetic Groups, Electron Carriers	Riboflavin and FAD metabolism	riboflavin (Vitamin B2)	0.93	1.045	0.9668	0.9004	1.3141	1.3767	1.3837	1.3202	1.255	0.9779	0.8714	0.8546	0.9501	0.9476	1.0176	0.9824	0.8286	1.0504	1.0567	1.1769	0.9644	1.032	0.8286	0.8286	0.8286	0.8286	0.8286	0.8286	0.8286	0.8286
1091	197	15797	LC/MS Neg	100000251	2390	455.097	130-40-5	710	C00061	HMDB01520	FMN	Cofactors, Prosthetic Groups, Electron Carriers	Riboflavin and FAD metabolism	flavin mononucleotide (FMN)	0.9008	0.9101	0.9497	1.1242	1.4656	1.8724	1.8694	0.9943	0.8643	0.8882	1.4429	1.1632	1.1601	1.279	1.0845	1.1556	0.9302	1.2306	1.0057	1.2282	1.3396	1.1347	0.5225	0.5165	0.3671	0.3412	0.3823	0.4597	0.4115	0.3667
1095	153	32354	LC/MS Pos Early	233	770	177.039	134-03-2		C00072	HMDB00044	ASCORBATE	Cofactors, Prosthetic Groups, Electron Carriers	Ascorbate metabolism	ascorbate (Vitamin C)	0.9371	0.9022	0.9081	0.8722	1.4179	1.8361	1.4377	1.0109	1.0344	0.8415	1.0659	1.1871	0.9134	0.8901	0.9872	0.7688	1.6607	1.4876	1.4227	0.9891	1.1192	0.9126	0.7688	0.7688	0.7688	0.7688	0.7688	0.7688	0.7688	0.7688
1096	182	34302	LC/MS Neg	301	739.6	173.009	490-83-5	835	C05422	HMDB01264	L-DEHYDRO-ASCORBATE	Cofactors, Prosthetic Groups, Electron Carriers	Ascorbate metabolism	dehydroascorbate	1.4405	1.3909	1.2379	1.479	1.006	1.1439	1.3221	0.852	0.961	1.076	1.0892	0.9056	1.0246	0.9382	0.8929	1.2238	0.994	1.2376	1.117	1.0375	1.037	0.9676	0.0528	0.0454	0.0501	0.0485	0.0502	0.044	0.0493	0.0969
1099	220	1476	LC/MS Polar	1020	3850	209.03	5793-88-4	33037	C00818	HMDB00663	D-GLUCARATE	Cofactors, Prosthetic Groups, Electron Carriers	Ascorbate metabolism	glucarate (saccharate)	1.9642	2.0953	2.2814	2.212	0.4599	0.4442	0.4371	3.124	2.9134	2.7189	1.0063	1.1161	0.9937	0.0789	0.0727	0.0613	4.8571	4.9588	4.7696	2.2949	2.4377	2.7501	0.0027	0.0016	0.0017	0.0014	0.0037	0.0041	0.003	0.0018
1102	410	27738	LC/MS Polar	100001022	2384	135.03	70753-61-6	151152	C01620	HMDB00943	L-THREONATE	Cofactors, Prosthetic Groups, Electron Carriers	Ascorbate metabolism	threonate	1.1034	0.9793	1.3559	1.161	2.0209	2.0579	1.9807	1.0026	1.192	1.211	0.881	1.0647	1.0269	1.114	1.1177	0.7635	1.0059	0.8445	1.0013	0.8825	0.9738	0.9987	0.1952	0.2324	0.2122	0.1907	0.1405	0.1467	0.1308	0.1232
1103	251	46957	LC/MS Polar	100001586	2750	195.051	20246-53-1	9794176		HMDB03290		Cofactors, Prosthetic Groups, Electron Carriers	Ascorbate metabolism	gulonate*	0.6646	0.6748	0.6895	0.7066	0.8281	0.8533	0.83	1.8704	1.7711	1.586	0.6156	0.6195	0.6394	0.7094	0.6591	0.6803	1.3331	1.3513	1.3451	0.9554	1.0084	0.9916	3.9124	3.2457	3.4429	2.974	4.6774	4.9437	4.6477	4.4859
1106	162	568	LC/MS Pos Early	251	2253	245.095	58-85-5	171548	C00120	HMDB00030	BIOTIN	Cofactors, Prosthetic Groups, Electron Carriers	Biotin metabolism	biotin	1.1133	1.1559	1.1143	1.0679	0.7707	0.8357	0.7513	1.2395	1.1397	1.1618	0.5461	0.5526	0.4994	0.6075	0.6228	0.65	1.2337	1.1128	1.1785	0.8922	0.9984	1.0016	0.4994	0.4994	0.4994	0.4994	0.4994	0.4994	0.4994	0.4994
1111	408	5341	LC/MS Pos Early	873	3050	265.112	59-43-8	1130	C00378	HMDB00235	THIAMINE	Cofactors, Prosthetic Groups, Electron Carriers	Thiamine metabolism	thiamin (Vitamin B1)	0.9862	1.0668	1.0494	1.0013	0.9987	0.9885	0.9934	2.4707	2.3178	2.2045	0.903	0.9377	0.9784	2.3652	2.3512	2.3379	1.6805	1.668	1.696	2.7595	2.7461	2.9072	0.0514	0.0472	0.0412	0.0403	0.0337	0.0372	0.0336	0.0288
1112	409	15798	LC/MS Pos Early	523	2378	345.078	532-40-1	3382778	C01081	HMDB02666	THIAMINE-P	Cofactors, Prosthetic Groups, Electron Carriers	Thiamine metabolism	thiamin monophosphate	0.4255	0.3935	0.3829	0.3595	1.0337	1.1446	0.9976	0.6705	0.6046	0.6046	0.5807	0.5726	0.625	1.0638	1.0451	1.0768	1.0702	1.0024	1.0366	1.396	1.3805	1.2957	0.3595	0.3595	0.3595	0.3595	0.3595	0.3595	0.3595	0.3595
1117	183	33418	LC/MS Pos Late	100001216	2259	402.349	119-13-1	92094	C14151	HMDB02902	DELTA-TOCOPHEROL	Cofactors, Prosthetic Groups, Electron Carriers	Tocopherol metabolism	delta-tocopherol	1.0454	0.994	1.1733	1.006	1.0518	1.0679	0.9613	0.9807	0.742	0.8492	0.9643	1.1468	0.9725	1.7234	1.621	1.4852	1.0998	1.1305	1.0849	1.3979	1.3653	1.6306	0.0341	0.0193	0.0234	0.02	0.0273	0.0213	0.0201	0.0333
1120	217	52473	LC/MS Pos Late	100008998	2384	416.364						Cofactors, Prosthetic Groups, Electron Carriers	Tocopherol metabolism	gamma-tocopherol/beta-tocopherol	0.9135	0.813	0.9178	0.9967	0.8776	0.9781	1.1081	1.0581	0.7406	1.0033	1.9463	1.8138	2.014	1.5245	1.3012	2.5452	1.4704	1.217	1.4279	2.2951	2.2875	2.2671	0.0226	0.0121	0.0142	0.0129	0.0228	0.0272	0.0316	0.0451
1124	373	1651	LC/MS Pos Early	491	2343	168.066	65-22-5	1050	C00250	HMDB01545	PYRIDOXAL	Cofactors, Prosthetic Groups, Electron Carriers	Vitamin B metabolism (B6 or B12)	pyridoxal	1.0587	1.1845	1.0058	1.0606	1.3101	1.2101	1.2304	1.1756	0.9882	0.9942	0.7333	0.6432	0.8591	0.9755	0.9596	1.0414	1.1988	1.1342	1.186	1.1529	1.1409	1.1001	0.1651	0.1471	0.1204	0.1233	0.1662	0.2122	0.1777	0.1679
1126	374	2150	LC/MS Pos Early	568	2975	169.097	58052-48-5	1052	C00534	HMDB01431	PYRIDOXAMINE	Cofactors, Prosthetic Groups, Electron Carriers	Vitamin B metabolism (B6 or B12)	pyridoxamine	1.3196	1.4046	1.425	1.256	4.8389	4.9215	4.9398	0.7591	0.7467	0.7096	2.1115	2.2932	2.3473	0.9073	0.9554	0.9043	1.3854	1.4285	1.3889	0.9881	1.015	1.0119	0.1468	0.1475	0.1618	0.1352	0.2061	0.2027	0.191	0.1719
1127	375	31555	LC/MS Polar	100001121	846	182.046	82-82-6	6723	C00847	HMDB00017		Cofactors, Prosthetic Groups, Electron Carriers	Vitamin B metabolism (B6 or B12)	pyridoxate	0.8804	0.8888	0.9927	0.9291	1.7195	1.5669	1.3901	1.3468	1.1174	1.086	0.8018	0.6965	0.782	1.2875	1.2782	1.2915	1.5431	1.7178	1.7618	1	1.0662	1.0156	0.0249	0.0177	0.0352	0.0177	0.0633	0.0625	0.051	0.0552
1128	376	608	LC/MS Neg	936	1657	168.067	58-56-0	1054	C00314	HMDB02075	PYRIDOXINE	Cofactors, Prosthetic Groups, Electron Carriers	Vitamin B metabolism (B6 or B12)	pyridoxine (Vitamin B6)	1.0036	1.2054	1.0614	1.1735	2.2531	2.6205	2.3338	0.8391	0.6667	0.5747	1.6658	1.3039	1.4541	0.4895	0.5047	0.4961	0.9964	1.0577	1.0467	1.0434	1.0123	1.0556	0.48	0.3551	0.3151	0.3186	0.2761	0.3816	0.4207	0.2554
1139	29	1527	LC/MS Pos Early	54	2133	150.077	5142-22-3	78821	C02216	HMDB11599		Nucleotide	Purine metabolism	1-methyladenine	0.7841	1.0023	1	0.8574	0.5982	0.6791	0.7013	1.1678	0.8245	0.7112	1.1223	0.9406	1.0449	0.8659	0.7712	0.6664	1.1226	1.2094	1.1444	1.5337	1.5302	1.2284	3.1377	2.5027	2.2284	2.0295	0.3302	0.3387	0.1629	0.1629
1140	30	32395	LC/MS Pos Early	100001133	2200	166.072	938-85-2	70315		HMDB03282		Nucleotide	Purine metabolism	1-methylguanine	0.6675	0.671	0.5984	0.4582	1.1985	1.1299	1.1001	0.7068	0.5711	0.5716	0.7099	0.7215	0.9545	0.6477	0.569	0.4642	1.037	1.3135	1.0228	0.8926	0.9772	1.0837	7.0247	6.0352	5.0697	5.1028	2.3439	2.9535	2.6117	2.3477
1142	83	1411	LC/MS Neg	348	1751	266.089	961-07-9	187790	C00330	HMDB00085	DEOXYGUANOSINE	Nucleotide	Purine metabolism	2'-deoxyguanosine	0.8261	1.0889	0.9027	1.0936	1.804	2.2379	1.8596	0.9372	0.7285	0.8375	0.8357	0.7785	0.8341	0.9597	0.8403	0.9719	0.6978	1.0014	0.9986	0.8347	1.1104	0.8927	1.9445	1.5911	1.2082	1.1122	1.3822	1.1642	1.2097	1.1731
1149	129	554	LC/MS Pos Early	880	2221	136.062	73-24-5	190	C00147	HMDB00034	ADENINE	Nucleotide	Purine metabolism	adenine	1.1891	1.2827	1.2357	1.2128	4.3262	4.243	4.0565	0.8109	0.7483	0.7405	0.7536	0.7849	0.8045	0.4105	0.4264	0.3887	0.5895	0.5918	0.5856	0.5419	0.5279	0.5614	5.7859	5.2514	4.876	4.9954	3.6806	4.1364	3.6588	3.587
1150	130	555	LC/MS Pos Early	798	2169	268.104	58-61-7	60961	C00212	HMDB00050	ADENOSINE	Nucleotide	Purine metabolism	adenosine	0.975	1.0471	0.9681	1.0064	1.2135	1.262	1.3414	1.1332	1.1582	1.1489	0.8908	0.8645	0.9314	0.9936	0.9836	1.0457	1.0974	1.0862	1.1026	1.1349	1.1586	1.0799	0.1073	0.1048	0.0924	0.0815	0.4124	0.4695	0.414	0.3947
1151	131	36815	LC/MS Neg	100001694	1497.7	346.056	130-49-4	94136	C00946	HMDB11617	CPD-3705	Nucleotide	Purine metabolism	adenosine 2'-monophosphate (2'-AMP)	1.2528	1.332	1.304	1.6357	2.498	2.9669	2.3876	0.9608	0.989	0.9218	1.646	1.3738	1.2836	0.907	0.8875	0.8319	1.011	1.3287	0.9518	1.0442	1.3606	1.1056	0.5015	0.4421	0.378	0.3669	0.6094	0.6261	0.6144	0.5595
1153	132	35142	LC/MS Neg	100001449	1245	346.056	84-21-9	41211	C01367	HMDB03540	CPD-3706	Nucleotide	Purine metabolism	adenosine 3'-monophosphate (3'-AMP)	1.0608	1.1226	1.2726	1.2739	2.8167	3.9271	2.7899	0.714	0.5343	0.4592	0.9244	0.9392	0.8728	0.5086	0.4181	0.3596	0.5636	0.6552	0.5563	0.6782	0.794	0.6922	4.737	5.1051	4.3199	3.732	4.5485	4.8944	4.7056	4.8112
1154	133	3108	LC/MS Neg	208	680	426.022	20398-34-9	6022	C00008	HMDB01341	ADP	Nucleotide	Purine metabolism	adenosine 5'-diphosphate (ADP)	0.3954	0.4482	0.3887	0.3887	1.0923	1.2248	1.2933	0.3887	0.463	0.4755	0.9739	0.5641	0.9962	2.3008	2.1659	2.2453	1.0038	0.8321	0.8968	1.4504	1.9273	1.647	0.3887	0.3887	0.3887	0.3887	0.3887	0.3887	0.3887	0.3887
1155	134	32342	LC/MS Neg	209	822	346.056	149022-20-8	6083	C00020	HMDB00045	AMP	Nucleotide	Purine metabolism	adenosine 5'-monophosphate (AMP)	0.9946	0.9406	0.937	0.9993	0.4555	0.4731	0.4467	0.8566	0.7268	0.6782	1.2238	1.2158	1.1735	1.8243	1.6473	1.8764	1.4023	1.5977	1.4671	2.1076	2.2322	2.1322	1.0007	1.0918	0.9245	0.9059	0.9821	1.1114	0.9322	0.94
1156	135	37467	LC/MS Neg	72	1793	328.045	37063-35-7	2024	C02353	HMDB11616		Nucleotide	Purine metabolism	adenosine-2',3'-cyclic monophosphate	2.1156	3.9911	5.9517	6.7617	1.4951	1.9466	1.5453	0.1581	0.1581	0.1581	5.9276	4.4925	3.9693	0.1581	0.1581	0.1581	0.2834	0.4222	0.2873	0.1581	0.1581	0.1581	0.8246	0.9138	0.707	0.6058	0.8854	1.0735	0.9265	0.8381
1157	303	35157	LC/MS Neg	100001415	2164	411.127	24719-82-2	161466		HMDB41623		Nucleotide	Purine metabolism	N6-carbamoylthreonyladenosine	1.0173	0.799	0.6909	1.1842	1.1825	1.4675	1.2996	1.1134	1.0585	0.9827	0.7686	0.7513	0.4256	1.0296	0.9426	0.9404	1.0605	1.6405	1.1218	0.8859	0.9649	0.9421	0.4256	0.4256	0.4256	0.4256	0.4256	0.4256	0.4256	0.4256
1159	140	33434	LC/MS Neg	218	652	175.047	99-16-1	203	C00499	HMDB01209	ALLANTOATE	Nucleotide	Purine metabolism	allantoic acid	0.0672	0.0672	0.0672	0.0672	0.8212	0.9039	0.7959	0.0672	0.0672	0.1106	0.5229	0.4893	0.3688	0.0672	0.0672	0.0672	0.0672	0.0672	0.0672	1.2062	1.2782	1.2265	2.9252	2.6205	2.2289	2.2439	1.1494	0.9572	1.1384	1
1160	141	1107	LC/MS Polar	1002	1672	157.037	97-59-6	204	C02350	HMDB00462	ALLANTOIN	Nucleotide	Purine metabolism	allantoin	0.1391	0.0925	0.0925	0.158	1.4364	1.5663	1.3888	0.5317	0.3877	0.3339	0.9441	1	0.9647	0.1578	0.2229	0.161	0.2329	0.2492	0.272	3.7341	4.1797	4.1222	1.4761	1.2588	1.3123	1.1374	1.7448	1.5392	1.479	1.259
1161	245	32352	LC/MS Neg	172	1330	150.042	73-40-5	764	C00242	HMDB00132	GUANINE	Nucleotide	Purine metabolism	guanine	0.7637	0.8176	0.834	0.9189	3.1176	3.9578	3.0957	0.9909	0.9157	0.873	1.0091	0.8839	0.9708	0.3545	0.3955	0.4018	1.2037	1.7076	1.3297	0.7705	0.9847	0.7724	18.1109	17.1522	15.1203	14.4663	23.9955	26.2977	23.279	22.4331
1162	246	1573	LC/MS Neg	1099	1662	282.084	118-00-3	6802	C00387	HMDB00133	GUANOSINE	Nucleotide	Purine metabolism	guanosine	1.0593	1.1828	0.9809	1.2682	2.0205	2.4713	2.0065	1.0836	0.9997	1.0391	1.0964	1.0375	0.9552	1.0003	0.9185	0.9278	0.92	1.1571	0.9689	1.2158	1.4091	1.2016	0.4412	0.4488	0.3779	0.3768	0.6673	0.7384	0.6787	0.7357
1164	249	2849	LC/MS Neg	347	653.2	362.051	5550-12-09	6804	C00144	HMDB01397	GMP	Nucleotide	Purine metabolism	guanosine 5'- monophosphate (5'-GMP)	0.762	0.762	0.762	0.762	0.762	0.762	0.762	0.762	0.762	0.762	0.762	0.762	0.762	0.762	0.762	0.762	0.762	0.762	0.762	0.762	0.762	0.762	1.2958	1.0696	1.2028	1.108	0.9081	0.762	0.8063	0.9304
1165	250	37139	LC/MS Neg	74	1480	344.04	15718-49-7	92823	C06194	HMDB11629		Nucleotide	Purine metabolism	guanosine-2',3'-cyclic monophosphate	2.381	4.1541	6.2096	7.4583	1.6166	2.1223	1.691	0.2594	0.2594	0.2594	6.1413	4.2072	3.8997	0.2594	0.2594	0.2594	0.5698	0.2594	0.406	0.4868	0.4079	0.4041	0.564	1.0421	0.6343	0.3969	0.7989	1.0415	0.8441	0.9585
1168	260	1123	LC/MS Neg	361	1602.1	267.073	58-63-9	6021	C00294	HMDB00195	INOSINE	Nucleotide	Purine metabolism	inosine	0.9957	0.8592	1.155	1.6413	1.0897	1.2989	1.5515	0.7737	0.9512	1.1907	1.0287	1.1109	0.7827	1.0043	1.0881	1.0674	0.8553	1.2223	0.9034	1.0288	1.2347	1.0988	0.2769	0.2927	0.2506	0.2414	0.4482	0.4251	0.4841	0.4733
1170	299	15650	LC/MS Pos Early	1242	2120	282.12	15763-06-1	27476	C02494	HMDB03331		Nucleotide	Purine metabolism	N1-methyladenosine	0.6418	0.6418	0.6418	0.6418	0.6418	0.6418	0.6418	0.6418	0.6418	0.6418	0.6418	0.6418	0.6418	0.6418	0.6418	0.6418	0.6418	0.6418	0.6418	0.6418	0.6418	0.6418	0.987	1.2838	1.013	0.6418	0.6418	1.214	0.7559	0.6418
1173	300	35137	LC/MS Pos Early	100001412	2210	312.13	2140-67-2	92919		HMDB04824		Nucleotide	Purine metabolism	N2,N2-dimethylguanosine	0.7657	0.7657	0.7657	0.7657	0.7657	0.7657	0.7657	0.7657	0.7657	0.7657	0.7657	0.7657	0.7657	0.7657	0.7657	0.7657	0.7657	0.7657	0.7657	0.7657	0.7657	0.7657	1.1794	1.2145	0.8206	0.7657	0.7657	0.7657	0.7657	0.7657
1176	304	37114	LC/MS Pos Early	213	2264	282.12	1867-73-8	102175		HMDB04044		Nucleotide	Purine metabolism	N6-methyladenosine	0.5584	0.5584	0.5584	0.5584	0.5584	0.5584	0.5584	0.5584	0.5584	0.5584	0.5584	0.5584	0.5584	0.5584	0.5584	0.5584	0.5584	0.5584	0.5584	0.5584	0.5584	0.5584	0.7794	0.6024	0.6404	0.5584	1.6303	1.9167	1.5674	1.2206
1178	438	3147	LC/MS Neg	1004	910	151.026	69-89-6	1188	C00385	HMDB00292	XANTHINE	Nucleotide	Purine metabolism	xanthine	0.9508	0.9739	0.7782	0.7819	1.0322	1.2022	1.0167	0.9351	1.0295	0.9833	1.0353	0.89	0.8795	0.4916	0.5576	0.3729	0.8189	1.3103	1.2268	0.8274	0.8378	0.4822	5.9392	7.8688	5.6628	5.4871	3.25	3.1171	3.4822	2.9632
1179	439	15136	LC/MS Neg	100000299	1075	283.068	146-80-5	64959	C01762	HMDB00299	XANTHOSINE	Nucleotide	Purine metabolism	xanthosine	0.9165	1.0467	1.0627	1.2328	0.9141	1	0.9774	1.4509	1.5879	1.369	1.0703	0.7365	0.885	0.9639	0.7727	0.8965	1.5632	1.6774	1.5995	1.2107	1.4029	1.2769	0.2439	0.2439	0.2439	0.2439	0.4838	0.4728	0.5146	0.647
1182	248	39786	LC/MS Neg	100002704	773.9	362.051	117-68-0	3522				Nucleotide	Purine metabolism	guanosine 3'-monophosphate (3'-GMP)	0.5837	1	0.9957	1.0352	1.2882	1.3507	1.7001	0.279	0.279	0.3786	0.3795	0.4043	0.3502	0.279	0.279	0.279	0.3624	0.279	0.5394	0.5732	0.3731	0.2807	6.5473	7.3973	5.9334	5.3865	15.1314	16.7471	14.3618	14.7168
1189	305	48130	LC/MS Neg	100001664	980	382.1	4542-23-8			HMDB00912		Nucleotide	Purine metabolism	N6-succinyladenosine	2.8637	3.0318	2.5723	3.9134	6.6626	9.8038	7.2572	1.8324	1.9339	1.8208	3.1975	2.7159	2.6778	0.787	0.893	0.8637	0.6172	0.7872	0.6316	1.0024	1.2108	0.9971	0.9762	0.984	0.7527	0.7777	0.9127	0.9976	0.8994	0.9117
1192	247	52442	LC/MS Neg	100002733	1241	362.051		444571				Nucleotide	Purine metabolism	guanosine 2'-monophosphate (2'-GMP)*	0.6934	0.6934	0.6934	0.6934	0.6934	0.6934	0.6934	0.6934	0.6934	0.6934	0.6934	0.6934	0.6934	0.6934	0.6934	0.6934	0.6934	0.6934	0.6934	0.6934	0.6934	0.6934	0.8824	0.8939	0.6934	0.7026	1.182	1.151	1.1061	1.754
1197	82	15949	LC/MS Pos Early	100000125	2193	228.098	951-77-9	13711	C00881	HMDB00014	DEOXYCYTIDINE	Nucleotide	Pyrimidine metabolism	2'-deoxycytidine	0.9763	1.1062	1.0968	0.951	3.523	3.264	2.8947	1.5516	1.3096	1.2327	0.9645	0.9763	1.0507	1.4083	1.3651	1.256	0.8551	0.8391	0.8467	1.0237	1.1385	1.1914	0.3817	0.3227	0.2778	0.2398	0.2789	0.3664	0.2953	0.2996
1200	99	1566	LC/MS Pos Early	1114	2215	104.071	10569-72-9;214139-20-5	64956	C05145	HMDB03911	3-AMINO-ISOBUTYRATE	Nucleotide	Pyrimidine metabolism	3-aminoisobutyrate	0.1621	0.4699	0.3016	0.1621	6.1712	6.3486	6.0202	1	0.9965	0.7674	3.7933	1.9204	2.0612	0.1621	5.2803	2.6644	0.9548	0.8966	0.8685	3.2557	1.022	0.1621	0.1621	0.1621	0.1621	0.1621	0.1621	0.2897	0.1621	0.3009
1209	175	514	LC/MS Pos Early	827	2124	244.093	65-46-3	6175	C00475	HMDB00089	CYTIDINE	Nucleotide	Pyrimidine metabolism	cytidine	0.9496	1.0157	1.0164	0.9421	2.5329	2.5428	2.5009	1.7411	1.6171	1.6078	1.0679	1.1411	1.1528	1.0395	0.9843	0.9415	0.7722	0.7462	0.7761	1.0722	1.1044	1.1288	0.7046	0.6187	0.536	0.5331	0.7365	0.89	0.77	0.6856
1210	178	2372	LC/MS Polar	282	4500	322.045	63-37-6	6131	C00055	HMDB00095	CMP	Nucleotide	Pyrimidine metabolism	cytidine 5'-monophosphate (5'-CMP)	0.8961	0.9514	1.16	1.0955	1.0319	1.1985	1.0001	0.9999	0.9282	1.0589	0.6962	0.555	0.8441	2.0025	2.2352	2.5218	1.3857	1.8361	1.6682	2.4233	2.6421	2.7192	0.5674	0.4184	0.423	0.3941	0.196	0.1077	0.2173	0.1735
1211	177	2959	LC/MS Neg	105	706.6	322.045	84-52-6	66535	C05822			Nucleotide	Pyrimidine metabolism	cytidine 3'-monophosphate (3'-CMP)	0.2552	0.2552	0.2552	0.2552	0.2552	0.2552	0.2552	0.2552	0.2552	0.2552	0.2552	0.2552	0.2552	0.2552	0.2552	0.2552	0.2552	0.2552	0.2552	0.2552	0.2552	0.2552	0.3771	0.2552	0.2552	0.3075	1	1.3389	1.1232	1.1486
1212	179	573	LC/MS Pos Early	881	2060	112.051	71-30-7	597	C00380	HMDB00630	CYTOSINE	Nucleotide	Pyrimidine metabolism	cytosine	0.6162	0.6433	0.5734	0.6132	0.9871	0.9918	1.077	1.3339	1.3151	1.3271	1.503	1.446	1.5556	1.0017	0.9983	1.078	1.2317	1.2072	1.2248	2.1839	2.2632	2.1142	0.0168	0.015	0.0144	0.0155	0.0104	0.0111	0.0134	0.0135
1213	176	37465	LC/MS Polar	73	2368	304.034	15718-51-1	417654	C02354	HMDB11691		Nucleotide	Pyrimidine metabolism	cytidine 2',3'-cyclic monophosphate	0.3929	0.3929	0.3929	0.3929	0.3929	0.3929	0.3929	0.3929	0.3929	0.3929	0.3929	0.3929	0.3929	0.3929	0.3929	0.3929	0.3929	0.3929	0.3929	0.3929	0.3929	0.3929	0.5194	0.6778	0.5414	0.3929	1.3222	1.7952	1.6307	1.5675
1214	186	601	LC/MS Polar	923	1910	157.025	155-54-4	648	C00337	HMDB03349	DI-H-OROTATE	Nucleotide	Pyrimidine metabolism	dihydroorotate	0.8744	0.7231	0.7909	0.6299	1.1165	1.0306	1.1143	0.901	1.4444	1.1434	1.8127	1.3383	1.1284	1.2482	1.3736	1.8008	0.9694	0.8818	0.7645	0.6865	0.6852	0.6808	0.6299	0.6299	0.6299	0.6299	0.6299	0.6299	0.6299	0.6299
1215	189	35651	LC/MS Pos Early	100001635	1980	143.082	96702-03-3	126041	C06231			Nucleotide	Pyrimidine metabolism	ectoine	0.5658	0.4644	0.0981	0.3915	0.0981	0.0981	0.3577	0.3206	0.6745	0.5253	2.4299	1.427	2.1828	4.5091	4.3278	7.9673	1.1154	1.0264	1.2731	1.3774	0.9736	0.2796	0.0981	0.0981	0.0981	0.0981	0.0981	0.0981	0.0981	0.0981
1217	348	1505	LC/MS Polar	445	1638.1	155.01	50887-69-9	967	C00295	HMDB00226	OROTATE	Nucleotide	Pyrimidine metabolism	orotate	0.6223	0.6149	0.7004	0.6646	7.8713	7.624	7.4459	1.6067	1.7481	1.626	0.9998	0.8385	1.0285	2.2258	2.4399	2.6798	1.0002	1.063	1.0463	1.0455	1.0514	0.9088	0.0244	0.0211	0.0225	0.0187	0.0384	0.0399	0.0437	0.0371
1218	349	35172	LC/MS Polar	100001416	2250	287.052	314-50-1	92751	C01103	HMDB00788	OROTIDINE-5-PHOSPHATE	Nucleotide	Pyrimidine metabolism	orotidine	1.0847	0.7296	0.628	0.8294	1.251	1.2602	0.9694	1.9046	2.4649	2.178	0.9722	1	1.3548	0.2501	0.2501	0.2501	0.8288	0.2501	0.9165	0.9516	1.1067	1.0719	0.2501	0.2501	0.2501	0.2501	0.2501	0.2501	0.2501	0.2501
1219	370	33442	LC/MS Neg	821	1100	243.062	1445-07-4	15047	C02067	HMDB00767		Nucleotide	Pyrimidine metabolism	pseudouridine	0.6778	0.8165	0.7559	0.8754	0.9959	1.3316	1.0041	0.7412	0.814	0.6912	1.0643	1.0893	0.9859	0.8124	0.7578	0.8454	0.8987	0.9111	0.8337	1.6535	1.9557	1.8294	3.2654	2.92	2.7114	2.6947	7.1722	6.688	6.7636	8.3547
1220	413	2183	LC/MS Pos Early	872	1400	243.098	50-89-5	5789	C00214	HMDB00273	THYMIDINE	Nucleotide	Pyrimidine metabolism	thymidine	1.0369	0.9631	0.7777	1.152	4.7708	4.5315	5.3899	1.0796	1.2331	0.9604	1.2819	1.1249	1.5471	1.6374	1.5979	1.7106	0.5265	0.5985	0.7404	1.1587	1.2225	0.9345	0.288	0.2935	0.373	0.3435	0.2183	0.4327	0.3979	0.596
1223	429	605	LC/MS Polar	825	1089.7	111.02	66-22-8	1174	C00106	HMDB00300	URACIL	Nucleotide	Pyrimidine metabolism	uracil	0.8507	0.9583	0.8255	1.2576	4.5331	4.9591	5.1062	0.6125	0.8763	0.7224	1.0417	1.3263	1.267	0.5856	0.7897	0.802	0.6754	0.374	0.5738	0.6419	0.8364	0.397	7.5072	5.9657	5.6521	5.1418	2.6627	2.3443	3.0421	2.3324
1224	430	606	LC/MS Neg	535	1457.6	243.062	58-96-8	6029	C00299	HMDB00296	URIDINE	Nucleotide	Pyrimidine metabolism	uridine	1.153	1.1523	1.0366	1.2387	2.4755	3.4885	2.9385	1.1938	1.1625	1.1544	1.2479	1.2068	0.9332	0.8804	0.7766	0.7517	1.0389	1.4371	1.0828	0.7953	0.9634	0.8619	0.5005	0.6249	0.3942	0.4021	0.4892	0.4667	0.4684	0.3911
1226	432	2856	LC/MS Neg	869	627	323.029	3387-36-8	6030	C00105	HMDB00288	UMP	Nucleotide	Pyrimidine metabolism	uridine 5'-monophosphate (UMP)	0.8305	0.8477	0.856	0.8702	0.7845	0.6245	0.6163	0.9796	0.9744	0.8869	1.0877	0.9944	1.1428	1.3057	1.4227	1.5314	1.2312	1.27	1.2443	1.4877	1.539	1.5725	1.2009	1.0056	1.1246	1.0771	0.5746	0.5916	0.575	0.5588
1227	433	37137	LC/MS Neg	75	1090	305.018	40632-52-8	439715	C02355	HMDB11640		Nucleotide	Pyrimidine metabolism	uridine-2',3'-cyclic monophosphate	0.6047	1.1089	1.7709	1.8222	0.9281	1.1732	1.0719	0.1546	0.1546	0.1546	2.5138	1.5843	1.3471	0.1546	0.1546	0.1546	0.1833	0.2457	0.1756	0.2127	0.1546	0.1635	0.6819	0.6717	0.5768	0.5554	1.6576	1.784	1.5658	1.6447
1229	157	55	LC/MS Pos Early	244	1905	90.055	56-41-7;107-95-9	239	C00099	HMDB00056	B-ALANINE	Nucleotide	Pyrimidine metabolism	beta-alanine	0.433	0.4602	0.4492	0.4348	3.1649	3.2402	3.1832	1.139	1.0216	1.0363	2.1318	2.1088	2.2031	2.4152	2.4459	2.4737	1.0036	0.9857	0.9964	0.9939	1.0126	1.0288	0.7279	0.6804	0.6259	0.6202	0.7764	0.9728	0.8347	0.8664
1232	431	39764	LC/MS Neg	106	750	323.029	35170-0-7;35170-03-7	101543	C01368			Nucleotide	Pyrimidine metabolism	uridine 3'-monophosphate (3'-UMP)	0.058	0.058	0.106	0.058	0.3121	0.2284	0.3328	0.058	0.0606	0.058	0.058	0.058	0.058	0.058	0.058	0.058	0.058	0.058	0.1044	0.058	0.1103	0.058	2.013	1.9431	1.7523	1.6672	3.3119	3.6398	3.3298	3.0701
1242	436	40475	LC/MS Neg	100003641	1506	173.093	686-43-1	136487		HMDB29127		Peptide	Dipeptide	valylglycine	0.689	0.7874	0.7012	0.8649	1.3222	1.681	1.2225	0.9637	0.966	0.815	0.7345	0.8726	0.5785	0.9252	1.1455	1.2689	0.6505	0.7239	0.6861	1.034	1.0359	0.8195	4.5009	3.9067	3.6158	3.2589	1.2249	1.7268	1.437	1.1321
1258	139	37093	LC/MS Pos Early	100001890	3055	203.139	1638-60-4	259583		HMDB28691		Peptide	Dipeptide	alanylleucine	0.8469	0.9168	0.9068	0.7857	1.3882	1.0832	1.0873	1.4713	1.4913	1.3817	0.814	0.9047	0.8068	1.3618	1.5706	1.3081	1.6775	1.854	1.6725	1.4874	1.6765	1.7443	0.435	0.4837	0.3743	0.5076	0.8538	0.8556	0.725	0.6539
1273	424	41375	LC/MS Neg	100003598	1635	237.088	673-05-5	259323				Peptide	Dipeptide	tyrosylglycine	0.7338	0.7343	0.6807	0.9551	2.0097	2.0999	1.7772	0.7676	0.8073	0.8133	1.4093	0.9966	1.1079	0.9929	0.8611	0.8235	0.7301	0.6835	0.6219	0.9474	1.2045	1.0034	2.4201	1.7353	1.7259	1.6664	1.4036	1.4248	1.3427	1.2519
1281	241	36659	LC/MS Neg	100001790	1820	187.109	19461-38-2	88079		HMDB28844		Peptide	Dipeptide	glycylisoleucine	1.0278	1.1964	0.794	0.9057	1.9853	1.7801	1.9774	1	0.9721	1.0836	0.9356	0.8439	0.8715	1.5847	0.9512	1.1986	1.2189	1.1966	1.3832	1.6252	1.6148	1.1676	0.6317	0.6439	0.6848	0.5124	0.6734	0.7678	0.5797	0.5124
1282	242	34398	LC/MS Neg	100001258	1890.6	187.109	869-19-2	92843	C02155	HMDB00759		Peptide	Dipeptide	glycylleucine	0.967	0.9916	0.8998	1.5734	1.3394	2.1346	1.6293	1.6057	0.9555	1.0476	1.3599	0.9745	0.6613	1.495	1.0549	0.8734	1.0084	1.788	1.0872	1.4079	1.7881	1.3203	0.5965	0.5992	0.5775	0.438	0.6178	0.4911	0.6845	0.4298
1291	243	18357	LC/MS Pos Early	100000487	2734	175.108	1963-21-9	97417		HMDB28854		Peptide	Dipeptide	glycylvaline	0.2555	0.3023	1.1798	0.5793	1.6983	1.419	0.8772	0.9708	0.2555	0.5918	0.3534	1	0.2555	0.9327	1.0359	0.2555	0.3033	0.4519	0.3475	0.5085	0.6215	1.7011	1.93	1.5561	1.6665	1.4696	1.5823	1.828	1.601	1.3328
1315	273	40045	LC/MS Pos Early	100003185	2778	189.123	686-50-0	79070				Peptide	Dipeptide	leucylglycine	0.8436	0.9439	0.8396	0.8215	1.287	1.1729	1.1615	1.1324	1.0316	0.9582	0.9082	0.9583	1.0627	1.0579	1.1897	1.1928	0.8913	0.8284	0.8708	0.8563	0.9122	0.9197	1.9967	1.6457	1.5337	1.6135	0.9911	1.1869	1.0089	0.974
1333	269	40008	LC/MS Neg	100003169	1992	187.109	868-28-0	342532				Peptide	Dipeptide	isoleucylglycine	0.8295	0.7932	0.8689	0.9351	1.1581	1.3078	0.9877	0.9188	0.8723	0.8287	0.8457	0.9228	0.765	1.347	1.4027	1.3499	0.8024	0.7185	0.8401	0.9757	1.2768	1.0123	5.8297	5.1196	5.4555	4.8852	1.2276	1.4541	1.6085	1.2193
1341	412	31530	LC/MS Neg	100001125	2322	265.119	16875-27-7	4099799;4099798				Peptide	Dipeptide	threonylphenylalanine	0.6689	0.7519	0.7981	0.9879	0.6623	0.9349	0.5077	1.1617	0.8837	0.9158	0.6085	0.6173	0.4863	1.267	1.0772	1.4018	1.0121	1.2088	0.9425	0.9404	1.1	0.919	1.6442	1.4756	1.1976	1.2966	1.5149	1.6617	1.6261	1.2803
1352	284	40020	LC/MS Pos Early	100003196	3370	260.197	7369-79-1	4682588				Peptide	Dipeptide	lysylleucine	0.8609	0.8458	0.8541	0.8073	1.2392	1.2483	1.2282	1.6728	1.3932	1.454	0.7439	0.8034	0.7799	1.9843	1.9049	1.9237	1.1444	1.017	1.162	1.4905	1.446	1.5108	0.3451	0.3269	0.3083	0.2652	0.7492	0.983	0.8387	0.5849
1359	437	39994	LC/MS Pos Early	100003210	3138	231.17	22906-55-4	352039		HMDB29131		Peptide	Dipeptide	valylleucine	0.8098	0.8936	0.8338	0.8355	0.8579	0.8692	0.8584	1.1687	1.0652	1.0969	0.7116	0.7486	0.8104	1.2025	1.0802	1.2368	1.17	1.2398	1.1846	0.9089	0.9911	0.9873	1.2749	1.1244	0.9656	1.0006	1.1123	1.2541	1.1876	0.9994
1383	361	41370	LC/MS Pos Early	100003588	2898	223.108	721-90-4	98207				Peptide	Dipeptide	phenylalanylglycine	0.6379	0.739	0.755	0.5587	0.7541	0.771	0.7346	1.2222	1.2358	0.9687	0.653	0.7696	0.8705	1.1749	1.165	1.229	0.9026	1.2396	1.0313	0.9409	0.8303	0.8615	1.8124	1.4991	1.3255	1.5823	1.8173	1.8861	1.6123	1.5844
1401	435	42079	LC/MS Pos Early	100003640	2295	246.145	42854-54-6	5253209				Peptide	Dipeptide	valylglutamine	0.6378	0.8029	0.6119	0.6237	1.9216	2.0014	2.0233	1.2911	1.1405	0.9861	0.751	0.8377	0.9418	1.0139	0.8878	1.039	0.7853	0.6183	0.7111	0.8533	0.8073	0.7004	2.2828	2.1861	1.8411	1.7298	1.5878	1.9719	1.5179	1.4882
1464	421	43028	LC/MS Neg	100003609	2481	260.104	7360-09-0	263471				Peptide	Dipeptide	tryptophylglycine	0.976	0.593	0.7044	0.7765	1.0927	1.4685	1.0648	1.2352	1.0906	1.0804	0.477	0.5166	0.4094	1.4198	1.3145	1.4329	0.9695	0.9227	1.1035	1.5888	1.7232	1.6847	0.8055	0.744	0.4464	0.4525	1.0403	0.9736	1.024	0.9142
1515	127	21156	LC/MS Neg	100000879	3170	263.129	14375-45-2	5280896	C06082	HMDB35140	CPD-693	Hormone metabolism	Abscisic acid metabolism	abscisate	1.7652	1.7609	1.4467	1.9225	2.0925	2.6395	2.3263	1.2321	1.288	1.1536	1.1143	1.0002	1.045	1.0224	0.977	0.9998	0.4965	0.609	0.5143	0.8337	1.0522	0.9768	0.026	0.0242	0.0201	0.0204	0.113	0.1327	0.1131	0.1093
1517	258	27513	LC/MS Pos Early	100001034	2850	176.071	6505-45-9	802	C00954	HMDB00197	INDOLE_ACETATE_AUXIN	Hormone metabolism	Auxin metabolism	indoleacetate	0.188	0.1735	0.1934	0.1456	0.2964	0.2916	0.1984	2.0682	1.7751	1.7068	0.0251	0.0287	0.0222	1.9088	1.6627	1.4375	0.3063	0.3208	0.3041	1.1138	1.2717	1.3998	3.6145	3.2542	3.1184	3.0735	0.9811	1.1152	1.0189	0.9299
1520	259	39613	LC/MS Neg	100003110	1685	289.083	2456-73-7	446620		HMDB38666	INDOLE-3-ACETYL-ASP	Hormone metabolism	Auxin metabolism	indoleacetylaspartate	0.4267	0.4487	0.4465	0.5912	2.2102	2.8479	2.261	2.6092	2.7344	2.3032	1.3279	1.0065	0.9757	2.0095	1.6278	1.5379	0.9578	1.3235	0.9935	1.1836	1.7887	1.2448	0.1387	0.133	0.0883	0.0915	0.1308	0.1532	0.1435	0.1131
1523	257	38116	LC/MS Neg	100002185	1708.8	160.04	771-50-6	69867	C19837	HMDB03320	CPD-13135	Hormone metabolism	Auxin metabolism	indole-3-carboxylic acid	0.5543	0.508	0.5271	0.6277	0.9125	0.9848	0.806	1.7638	1.837	1.6159	0.491	0.2532	0.2544	1.884	1.9191	1.8874	1.0115	1.2679	0.9885	1.5767	2.0345	1.4576	0.2532	0.2532	0.2532	0.2532	0.2532	0.2532	0.2532	0.2532
1533	173	35660	LC/MS Polar	100001645	1516	113.036	6232-19-5	13538	C02512		CPD-603	Hormone metabolism	Ethylene metabolism	cyano-alanine	0.8984	1.0717	0.8416	0.8489	2.4187	2.3742	2.7586	0.7967	0.8535	0.8062	2.3378	1.5624	2.1606	1.0639	1.2348	1.3966	0.6596	0.7933	0.644	1.1332	0.9096	0.9361	0.644	0.644	0.644	0.644	0.644	0.644	0.644	0.644
1560	388	45419	LC/MS Neg	100005462	2534	299.114	10338-51-9	159278				Secondary metabolism	Alkaloids	salidroside	1.1811	1.1003	0.9886	1.212	5.8799	6.462	6.5212	1.1606	1.0114	1.1005	0.982	1.1368	1.0166	0.6613	0.6722	0.6499	0.559	0.6162	0.5728	0.7059	0.8935	0.7458	0.559	0.559	0.559	0.559	0.559	0.559	0.559	0.559
1576	116	21133	LC/MS Polar	100000862	1305	137.024	99-96-7	135	C00156	HMDB00500	4-hydroxybenzoate	Secondary metabolism	Benzenoids	4-hydroxybenzoate	0.9753	1.1303	1.176	1.1988	1.6873	1.5222	1.5983	0.7695	1.0039	1.0268	1.1574	0.4924	0.7241	0.6091	1.0324	0.9151	0.315	0.7137	0.3983	1.1418	1.1657	1	0.315	0.315	0.315	0.315	0.3462	0.8285	0.9414	0.315
1593	387	1515	LC/MS Polar	501	802	137.024	69-72-7	338	C00805	HMDB01895	CPD-110	Secondary metabolism	Benzenoids	salicylate	1.9176	2.0269	1.6352	1.7927	21.1138	21.307	22.8795	2.0846	2.4888	1.972	0.5087	0.5101	0.3532	0.7163	0.8436	1.1592	5.3296	7.1516	7.0032	0.4798	0.4527	0.7078	0.6669	0.689	0.6583	0.5043	0.9699	1.0301	0.9554	0.7939
1602	200	20881	LC/MS Polar	100000881	3950	209.03	526-99-8	3037071;3037582	C00879	HMDB00639		Secondary metabolism	Fatty acid and sugar derivatives	galactarate (mucic acid)	1.328	1.4227	1.6791	1.4812	1.0187	0.9813	0.9693	1.9958	1.414	1.2551	0.9134	1.1779	0.9244	0.6122	0.5986	0.5698	1.8981	2.0173	1.9481	1.0906	1.1124	1.4296	0.0015	0.0009	0.0011	0.0008	0.0007	0.0009	0.0011	0.0007
1609	147	21189	LC/MS Neg	100000935	3845.4	269.046	520-36-5	5280443	C01477	HMDB02124	CPD-431	Secondary metabolism	Flavonoids	apigenin	0.4222	0.3286	0.225	0.2843	9.2354	5.8089	6.4599	0.209	0.209	0.209	0.2449	0.209	0.209	0.8623	0.6636	1	0.209	0.209	0.209	0.209	0.3904	0.209	3.6549	3.8668	3.7895	2.9619	1.2152	1.038	1.09	0.8161
1619	180	32453	LC/MS Neg	100001219	3566	253.051	486-66-8	5281708	C10208	HMDB03312	DAIDZEIN	Secondary metabolism	Flavonoids	daidzein	0.0347	0.0347	0.0347	0.0347	0.0347	0.0514	0.0408	0.0347	0.0347	0.0347	0.0347	0.0347	0.0347	0.0741	0.0652	0.0777	0.0347	0.0347	0.0347	0.0347	0.0347	0.0347	1.4809	1.3117	1.2019	1.1121	1.1108	1.2403	1.0239	0.9761
1620	181	32435	LC/MS Neg	100001218	3217	415.103	552-66-9	107971	C10216	HMDB33991	CPD-3424	Secondary metabolism	Flavonoids	daidzin	0.906	0.906	0.906	0.906	0.906	0.906	0.906	0.906	0.906	0.906	0.906	0.906	0.906	0.906	0.906	0.906	0.906	0.906	0.906	0.906	0.906	0.906	1.2693	1.1725	0.9368	0.9266	0.906	0.9901	1.0167	1.0099
1631	218	32448	LC/MS Neg	100001221	3754	269.046	446-72-0	5280961	C06563	HMDB03217	CPD-3141	Secondary metabolism	Flavonoids	genistein	0.3197	0.2167	0.2292	0.3091	0.9829	1.0171	0.9449	0.2583	0.2925	0.2341	0.2167	0.1982	0.1782	15.1412	12.7295	16.0939	2.1527	2.6132	1.8583	0.4458	0.6036	0.4511	7.2053	6.7908	5.9708	5.4459	15.0761	16.6973	14.9864	12.5592
1633	239	34024	LC/MS Pos Early	100001222	3245	285.076	40957-83-3	5317750	C14536	HMDB05781		Secondary metabolism	Flavonoids	glycitein	0.1066	0.1066	0.1066	0.1066	0.1171	0.1132	0.1066	0.1066	0.1066	0.1066	0.1066	0.1066	0.1066	0.1066	0.1066	0.1066	0.1066	0.1066	0.1066	0.1066	0.1066	0.1066	1.5562	1.3778	1.1969	1.1856	1	0.9806	1.0069	0.8414
1634	240	32432	LC/MS Pos Early	100001217	2326	447.129	40426-10-4	187808	C16195	HMDB02219		Secondary metabolism	Flavonoids	glycitin	0.4715	0.4715	0.4715	0.4715	0.4715	0.4715	0.4715	0.4715	0.4715	0.4715	0.4715	0.4715	0.4715	0.4715	0.4715	0.4715	0.4715	0.4715	0.4715	0.4715	0.4715	0.4715	1.6538	1.3743	1.3904	1.3527	0.5449	0.6473	0.4839	0.4715
1647	325	44663	LC/MS Neg	100000920	3437	271.061	67604-48-2	932	C00509	HMDB02670	NARINGENIN-CMPD	Secondary metabolism	Flavonoids	naringenin	1.0657	1.1004	0.9712	1.1031	1.0024	1.0933	0.9976	0.9261	1.0382	0.9534	0.5876	0.5654	0.5223	8.731	8.1494	8.5669	2.1063	2.3357	1.8901	1.2599	1.6325	1.5003	0.245	0.1941	0.1588	0.1361	0.907	0.9667	0.8767	0.8012
1766	219	48729	LC/MS Neg	100006372	1434	315.072	1820-89-9	10914066				Secondary metabolism	Phenylpropanoids	gentisic acid-5-glucoside	2.6239	2.4687	2.2251	2.8722	2.0658	2.5459	2.1934	1.7806	1.8721	1.7518	0.6069	0.6279	0.5445	1.0228	0.9996	1.0004	1.8665	2.2771	1.898	0.6	0.7343	0.6452	0.1708	0.1726	0.1502	0.1388	0.1678	0.1718	0.1569	0.1623
1811	394	43590	LC/MS Neg	100004481	5163	941.512	51330-27-9	122097	C08983	HMDB34649	cpd-13255	Secondary metabolism	Terpenoids	soyasaponin I	0.8689	0.9321	0.8877	1.3159	1.1613	1.6269	1.3196	0.9899	1.0578	0.9372	1.1469	0.8799	0.7736	1.1379	1.0394	1.0101	1.0777	1.3967	1.016	1.1443	1.6797	1.2349	0.0264	0.0217	0.0236	0.0207	0.0395	0.0367	0.041	0.0379
1812	395	43589	LC/MS Neg	100004482	5175	911.501	55319-36-3	171435	C12081	HMDB34650		Secondary metabolism	Terpenoids	soyasaponin II	1.0709	1.1449	0.9822	1.4085	0.518	0.6933	0.5927	1.0956	1.0966	1.0178	0.8678	0.6816	0.6178	1.4343	1.2618	1.3569	1.3311	2.0768	1.4072	1.3965	2.0803	1.4764	0.0116	0.0089	0.0106	0.0104	0.0158	0.0145	0.0169	0.0163
1832	102	531	LC/MS Polar	112	2700	161.046	503-49-1	1662	C03761	HMDB00355		Secondary metabolism	Terpenoids	3-hydroxy-3-methylglutarate	0.8637	0.8972	0.7736	0.9442	1.0992	1.17	1.211	1.2776	1.3066	1.2722	0.9681	0.7382	0.9621	1.832	1.7536	1.9852	1.628	1.7339	1.7672	1.2945	1.2278	1.0319	0.1714	0.1567	0.1471	0.1365	0.1824	0.1752	0.1708	0.1672
1835	396	54925	LC/MS Neg	100010905	5176	795.454			C19865			Secondary metabolism	Terpenoids	soyasaponin III	1.4135	1.4272	1.1707	1.8206	1.2219	1.6537	1.4017	1.0015	1.0443	0.9591	1.0217	0.7839	0.6868	0.9985	0.833	0.9168	1.3305	2.2558	1.3944	0.9677	1.5797	1.0361	0.0233	0.0194	0.019	0.0181	0.0262	0.0237	0.0253	0.024
1906	418	40406	LC/MS Pos Early	100003397	2100	76.0757	1184-78-7	1145	C01104	HMDB00925		Xenobiotics	Chemicals	trimethylamine N-oxide	0.901	0.7319	0.7129	0.1689	1.48	1.5889	1.8293	0.979	1.2866	1.1371	0.5888	0.6223	0.4145	1	0.6712	1.4771	1.452	1.8556	1.9771	1.783	2.2975	2.2159	0.1689	0.1689	0.2072	0.1689	0.3486	0.2623	0.1689	0.1689

## Sheet: Statistical Heat Map
	University of Arizona UNAZ-03-15VW Genically Engineered Soybean Study
	Heat map of statistically significant biochemicals profiled in this study. Red and green shaded cells indicate p≤0.05 (red indicates that the mean values are significantly higher for that comparison; green values significantly lower). Light red and light green shaded cells indicate 0.05<p<0.10 (light red indicates that the mean values trend higher for that comparison; light green values trend low…										Fold of Change (Ratios of Group Means from Scaled Imputed Data)									Statistical Values (From log transformed Scaled Imputed Data)																	Mean Values (Scaled Imputed Data)										% Detected by Group in RAW Data
											TEST1 COMP1	TEST1 COMP2	TEST1 COMP3	TEST1 COMP4	TEST1 COMP5	TEST1 COMP6	TEST1 COMP7	Manual		AiP7 / Jack		AiP10 / Jack		AiPR4 / Jack		ATB2 / Jack		ATB33 / Jack		ATBR4 / Jack		SP / Jack Aleu		Jack / Jack Aleu
	Pathway Order	Super Pathway	Sub Pathway	Biochemical Name	Platform	Comp ID	KEGG	PlantCyc	PUBCHEM	X	AiP7 / Jack	AiP10 / Jack	AiPR4 / Jack	ATB2 / Jack	ATB33 / Jack	ATBR4 / Jack	SP / Jack Aleu	Cotyledon / Aleurone	X	p-value	q-value	p-value	q-value	p-value	q-value	p-value	q-value	p-value	q-value	p-value	q-value	p-value	q-value	p-value	q-value	X	Jack	AiP7	AiP10	AiPR4	ATB2	ATB33	ATBR4	Jack Aleu	SP	X	Jack	AiP7	AiP10
	2	Amino acid	Serine family (phosphoglycerate derived)	betaine	LC/MS pos early	3141	C00719	BETAINE	247		1	1.11	0.99	2.9	1.22	1.38	1.66	1.2404		0.8576	0.0877	0.0122	0.0081	0.6673	0.1352	1.0176e-05	1.0805e-05	0.0016	0.0015	4.9837e-05	8.0634e-05	7.4959e-05	8.8771e-05	4.96534e-08			0.9205	0.9167	1.019	0.9111	2.6702	1.1195	1.2717	0.7421	1.2297		100	100	100
	4			cysteine	LC/MS pos early	1868	C00097	CYS	5862		2.42	1.63	1.02	3.62	0.86	1.57	1.41	0.797356		0.0008	0.0002	0.0064	0.0048	0.7486	0.1454	0.0004	0.0002	0.2231	0.0793	0.0182	0.0084	0.0281	0.0086	3.42174e-05			0.7299	1.7669	1.1896	0.7447	2.6397	0.6255	1.1478	0.9154	1.2874		100	100	100
	7			dimethylglycine	LC/MS pos early	5086	C01026		673		2.14	0.97	1.88	2.35	1.11	1.22				0.048	0.0063	0.736	0.1636	0.0029	0.0019	0.0009	0.0003	0.6389	0.1805	0.1052	0.0376						0.7653	1.6371	0.7398	1.4398	1.798	0.8489	0.9338				100	100	100
	8			glycine	LC/MS pos early	58	C00037	GLY	750		4.46	1.18	2.14	2.16	1.21	1.72	1.32	0.668427		9.0866e-07	1.4794e-06	0.0163	0.0102	2.1121e-05	6.9042e-05	3.3147e-05	2.7605e-05	0.002	0.0017	3.114e-05	6.364e-05	0.0047	0.0019	5.99032e-06			0.5949	2.6562	0.7024	1.2747	1.2846	0.7203	1.0253	0.89	1.1765		100	100	100
	13			N-acetylserine	LC/MS pos early	37076		ACETYLSERINE	65249		1.5	1.35	0.93	2.13	1.28	1.17	0.83	0.712308		0.0045	0.0008	0.0011	0.0015	0.0854	0.026	9.2759e-07	1.5153e-06	0.0002	0.0003	0.0208	0.0094	0.0012	0.0007	0.00430363			0.7923	1.1852	1.068	0.7403	1.6843	1.0163	0.9293	1.1123	0.9189		100	100	100
	16			serine	LC/MS pos early	1648	C00065	SER	5951		4.93	1.37	2.29	2.65	1.64	1.71	1.28	0.680726		1.0869e-06	1.6427e-06	8.1353e-05	0.0002	1.3215e-06	9.9359e-06	2.8316e-06	3.7582e-06	9.216e-05	0.0002	2.7942e-05	6.1284e-05	0.0002	0.0002	7.81552e-07			0.5891	2.9061	0.8068	1.3463	1.5585	0.9634	1.0092	0.8654	1.1118		100	100	100
	19			S-carboxymethyl-L-cysteine	LC/MS pos early	47897	C03727		1080		2.63	1.41	1.94	4.87	1.12	1.37	1.38	0.781127		0.008	0.0013	0.1271	0.0464	0.0179	0.0077	0.0012	0.0004	0.4322	0.1331	0.1232	0.0429	0.0092	0.0033	8.82177e-05			0.6556	1.722	0.9226	1.2736	3.1922	0.732	0.8993	0.8393	1.1546		100	100	100
	24			sulfate*	LC/MS neg	46960	C00059		1118		2	0.93	0.5	2.82	1.12	2.74	1.41	1.06395		2.0679e-06	2.3352e-06	0.1971	0.0632	1.1578e-07	1.7828e-06	0.0004	0.0002	0.0019	0.0017	2.6237e-08	1.2947e-06	0.0003	0.0002	0.000110691			0.9018	1.8033	0.838	0.4529	2.5438	1.0134	2.4743	0.8476	1.1931		100	100	100
	31			2-methylserine	LC/MS pos early	53229			94309		1.92	1.09	1.47	1.79	0.85	1.14	1.69	1.12286		0.0002	6.0801e-05	0.1726	0.0575	0.0003	0.0004	3.5857e-05	2.8735e-05	0.0108	0.0064	0.0268	0.0117	0.002	0.001	2.50757e-05			0.8591	1.6461	0.938	1.2617	1.5337	0.7309	0.9757	0.7651	1.293		100	100	100
	32		Aromatic amino acid metabolism (PEP derived)	3-(4-hydroxyphenyl)lactate	LC/MS neg	32197	C03672	CPD-2222	9378		4.24	0.44	0.44	0.43	0.43	0.9	1.33	2.09796		3.2429e-06	3.0111e-06	0.0055	0.0046	0.0297	0.0112	0.0062	0.0014	0.0141	0.0079	0.3229	0.0943	0.0144	0.0049	0.00013101			1.7925	7.6085	0.7813	0.7934	0.7764	0.7708	1.615	0.8544	1.1398		100	100	100
	39			4-hydroxyphenylpyruvate	LC/MS neg	1669	C01179	P-HYDROXY-PHENYLPYRUVATE	979		1.73	0.74	0.53	1.5	0.79	1.2	0.41	0.680351		0.0409	0.0055	0.0649	0.0276	0.006	0.0033	0.0152	0.0029	0.1706	0.0651	0.4518	0.1246	0.0002	0.0002	0.00201471			1.0623	1.8411	0.7901	0.5676	1.5893	0.8421	1.2748	1.5614	0.638		100	100	100
	42			anthranilate	LC/MS pos early	4970	C00108	ANTHRANILATE	227								0.68															0.105	0.0257											1.0376	0.7049		0	0	0
	51			kynurenate	LC/MS neg	1417	C01717		3845		19.54	3.24	2.85	5.6	2.68	4.71	0.79	0.296421		7.0302e-06	5.5424e-06	0.001	0.0014	0.0014	0.0011	0.0002	0.0001	0.0132	0.0075	0.0003	0.0003	0.0606	0.0166	0.0408203			0.2808	5.4856	0.9088	0.7994	1.572	0.7525	1.322	0.9473	0.7448		50	100	100
	54			N-acetylphenylalanine	LC/MS neg	33950	C03519		74839		3.67	1.37	1.09	1.36	1.86	1.74	0.58	0.47119		7.8958e-05	3.2991e-05	0.0227	0.0129	0.5442	0.1163	0.0178	0.0033	0.0036	0.0027	0.0256	0.0112	0.0484	0.0138	0.358528			0.7139	2.6232	0.9762	0.7801	0.9742	1.3256	1.2406	1.5151	0.8779		100	100	100
	56			N-acetyltryptophan	LC/MS neg	33959	C03137		700653		5.5	19.96	0.85	17.16	4.62	16.39	1.03	0.166951		5.6654e-05	2.6145e-05	5.2343e-06	3.1782e-05	0.0847	0.026	3.1561e-07	9.5747e-07	7.898e-06	3.6274e-05	1.7087e-06	1.2046e-05	0.391	0.0782	0.000254482			0.1565	0.8605	3.1244	0.1328	2.6856	0.7238	2.5658	0.9374	0.9687		100	100	100
	63			phenylalanine	LC/MS pos early	64	C00079	PHE	6140		3.12	1.32	1.16	2.28	1.46	1.43	1.67	0.947107		9.238e-06	6.8927e-06	0.0001	0.0003	0.0084	0.0043	7.0531e-07	1.2102e-06	4.4574e-05	0.0001	0.0001	0.0001	1.9898e-05	4.3338e-05	0.28671			0.7055	2.2037	0.9306	0.8206	1.6061	1.0307	1.0069	0.7449	1.2409		100	100	100
	66			quinate	LC/MS polar	18335	C00296	QUINATE	6508		1.29	0.8	1.08	1.15	0.65	0.87	0.83	0.892074		0.2519	0.0281	0.4071	0.1081	0.5661	0.1192	0.4775	0.0537	0.0498	0.023	0.319	0.0937	0.6261	0.1174	0.012644			1.0704	1.3828	0.8616	1.1556	1.2325	0.6933	0.9332	1.1999	0.9953		100	100	100
	68			shikimate	LC/MS polar	15144	C00493	SHIKIMATE	8742		3.13	0.86	1.82	1.63	0.82	1.19	0.33	0.553412		1.7667e-05	1.1534e-05	0.0444	0.0208	0.0019	0.0014	0.0063	0.0014	0.0005	0.0006	0.0066	0.0035	5.1997e-07	7.2202e-06	6.74657e-05			0.8636	2.7055	0.7408	1.5692	1.4118	0.7074	1.0268	1.5605	0.5149		100	100	100
	69			tryptophan	LC/MS pos early	54	C00078	TRP	6305		3.39	8.92	0.09	11.73	2.68	6.93	4.15	0.684404		2.4065e-07	7.7346e-07	2.1945e-07	6.2183e-06	5.5116e-05	0.0001	1.595e-06	2.4194e-06	2.6434e-05	8.726e-05	1.1039e-07	2.6797e-06	4.9195e-06	2.0355e-05	1.33824e-07			0.2984	1.0112	2.6624	0.0262	3.5016	0.7999	2.0684	0.436	1.8104		100	100	100
	71			tyrosine	LC/MS pos early	1299	C00082	TYR	6057		3.96	1.37	1.56	1.74	1.75	1.38	1.27	0.72356		3.2049e-06	3.0111e-06	0.0041	0.0037	0.0008	0.0007	0.0002	0.0001	0.0003	0.0004	0.0026	0.0018	0.0013	0.0007	0.00516808			0.652	2.583	0.8942	1.0182	1.135	1.1434	0.8971	0.9011	1.1453		100	100	100
	82			O-sulfo-L-tyrosine	LC/MS neg	45413			514186		1.56	1.12	1.37	0.92	1.18	1.36	1.68	1.1713		0.026	0.0037	0.1942	0.0625	0.0111	0.0053	0.3192	0.0379	0.1114	0.0449	0.1475	0.0496	0.0001	0.0001	0.0116274			0.8561	1.338	0.9605	1.1692	0.7868	1.0088	1.1637	0.7309	1.2299		100	100	100
	83			tryptamine	LC/MS pos early	6104	C00398	TRYPTAMINE	1150		1	7.69	1	4.39	1.44	3.16						0.0007	0.001			0.0003	0.0001	0.1975	0.073	0.0031	0.002						0.2617	0.2617	2.0114	0.2617	1.1478	0.3756	0.8265				0	0	100
	85			tyramine	LC/MS pos early	1603	C00483	TYRAMINE	5610		9.42	1	1.04	1.12	1.14	1				0.0003	8.1338e-05			0.4226	0.0949	0.4226	0.0485	0.2097	0.0756								0.7568	7.1294	0.7568	0.7871	0.8506	0.8633	0.7568				0	100	33
	91			N-formylphenylalanine	LC/MS neg	48433			759256		2.56	1.6	0.71	1.43	1.84	1.34	0.56	0.603656		0.0015	0.0003	0.0004	0.0007	0.1416	0.0396	0.0018	0.0005	0.0055	0.0037	0.0032	0.002	0.0821	0.0211	7.92001e-05			0.7	1.7893	1.1219	0.4971	1.004	1.286	0.9369	1.1596	0.6492		100	100	100
	112		Aspartate family (OAA derived)	2-aminoadipate	LC/MS polar	6146	C00956	CPD-468	469		1.56	0.91	1.21	2.75	1.01	1.98	1.42	1.02457		0.0001	4.6389e-05	0.2098	0.0653	0.0069	0.0037	5.1575e-07	1.1151e-06	0.6233	0.177	1.2595e-05	4.2866e-05	0.0004	0.0003	1.37455e-06			0.8508	1.3237	0.7723	1.0315	2.3378	0.8608	1.6842	0.8304	1.1816		100	100	100
	113			2-oxoadipate	LC/MS polar	38347	C00322	2K-ADIPATE	71		0.64	1.13	0.42	2.02	0.88	2.51	0.59	0.742043		0.0015	0.0003	0.0907	0.0359	3.2707e-05	9.1076e-05	0.0004	0.0001	0.0883	0.0367	1.5118e-05	4.6628e-05	0.0022	0.001	2.44593e-07			1.0048	0.6458	1.1381	0.424	2.0308	0.8856	2.5265	1.3541	0.7966		100	100	100
	114			alanine	LC/MS pos early	1126	C00041	L-ALPHA-ALANINE	5950		4.25	0.92	2.09	1.43	1.3	1.3	1.69	1.03128		2.4711e-09	3.4417e-08	0.0302	0.0153	1.9015e-06	1.1914e-05	3.4538e-05	2.821e-05	2.0667e-05	7.2771e-05	3.4707e-05	6.3902e-05	9.0002e-06	2.7315e-05	0.00770241			0.7681	3.2612	0.7068	1.6063	1.0999	0.9947	0.9962	0.7448	1.2551		100	100	100
	116			asparagine	LC/MS pos early	512	C00152	ASN	6267		21.36	3.01	12.02	7.49	3.55	3.41	0.36	0.190732		9.0834e-08	3.7953e-07	1.6003e-07	6.2183e-06	1.4402e-08	5.4141e-07	5.1791e-07	1.1151e-06	2.5415e-07	2.983e-06	3.9082e-06	1.8368e-05	3.2632e-07	7.2202e-06	5.36186e-05			0.284	6.0656	0.8557	3.4141	2.1284	1.0074	0.9677	1.489	0.5339		100	100	100
	117			aspartate	LC/MS pos early	443	C00049	L-ASPARTATE	5960		5.77	1.33	4.09	2.17	1.58	1.17	0.82	0.590905		0.0001	3.9963e-05	0.0218	0.0127	4.4103e-05	0.0001	1.3072e-06	2.0562e-06	1.928e-05	7.2736e-05	0.0056	0.0031	0.0031	0.0014	4.69628e-07			0.638	3.6831	0.8499	2.6108	1.3851	1.0064	0.748	1.0797	0.8888		100	100	100
	123			lysine	LC/MS pos early	1301	C00047	LYS	5962		2.97	1.37	1.34	1.42	1.53	1.35	1	0.70086		2.9763e-08	1.7765e-07	0.0008	0.0011	0.0024	0.0017	8.9497e-05	5.4302e-05	8.5822e-07	8.2417e-06	3.6931e-06	1.8225e-05	0.9908	0.1726	0.000569675			0.7256	2.1523	0.9917	0.9732	1.0319	1.1128	0.9803	1.0353	1.0329		100	100	100
	124			methionine	LC/MS pos early	1302	C00073	MET	6137		4.21	1.1	1.5	2.78	1.15	2.04	1.27	0.802257		2.5391e-06	2.6523e-06	0.0313	0.0156	0.0027	0.0019	0.0002	8.0278e-05	0.009	0.0055	6.2824e-06	2.6959e-05	0.0023	0.0011	3.7617e-05			0.6966	2.9314	0.7657	1.0423	1.9353	0.8017	1.4244	0.8683	1.1023		100	100	100
	125			methionine sulfoxide	LC/MS pos early	18374	C02989	L-Methionine-sulfoxides	158980		4.03	1.3	1.59	2.75	1.39	2.46	0.79	0.603609		3.1899e-06	3.0111e-06	0.0249	0.0136	0.0043	0.0026	1.1017e-05	1.1413e-05	0.0044	0.0031	0.0001	0.0002	0.0318	0.0095	0.000218006			0.6723	2.7107	0.8709	1.0682	1.851	0.9375	1.6524	1.1138	0.8836		100	100	100
	127			N6-acetyllysine	LC/MS neg	36752	C02727		92832		6.11	2.08	3.17	1.76	1.74	2.14	0.86	0.477851		2.3173e-07	7.7346e-07	0.0002	0.0004	0.0008	0.0008	0.0153	0.0029	0.0002	0.0004	0.0007	0.0006	0.128	0.0305	0.176178			0.5016	3.0632	1.043	1.5925	0.8817	0.8732	1.0717	1.0497	0.8982		100	100	100
	128			N6,N6,N6-trimethyllysine	LC/MS pos early	1498	C03793		440120		1.52	1	0.83	1.08	1.3	1.49	0.96	0.89274		0.0002	6.2808e-05	0.93	0.1959	0.0048	0.0028	0.062	0.0092	0.0017	0.0016	0.0002	0.0002	0.6301	0.1178	0.000113894			0.9272	1.4136	0.9235	0.7685	1.0009	1.2014	1.3825	1.0386	1		100	100	100
	130			N-acetylalanine	LC/MS polar	1585	C02847		88064		2.66	1.09	1.21	1.01	1.02	1.24	0.71	0.75		0.0008	0.0002	0.3895	0.1048	0.2807	0.0703	0.8615	0.0895	0.8517	0.2272	0.1011	0.0364	0.0951	0.0237	0.00602297			0.9021	2.4008	0.9821	1.0889	0.9145	0.92	1.1209	1.2028	0.8575		100	100	100
	131			N-acetylasparagine	LC/MS pos early	33942			99715		20.64	1	9.56	4.83	2.63	2.45	0.81	0.225021		0.0003	9.7368e-05			0.0002	0.0003	0.0083	0.0018	0.0084	0.0052	0.1993	0.0637	0.058	0.016	0.000401663			0.2126	4.3873	0.2126	2.0319	1.0276	0.5594	0.5216	0.9448	0.7653		0	100	33
	132			N-acetylaspartate (NAA)	LC/MS polar	22185	C01042		65065		2.03	1.25	1.97	1.81	0.9	1.26	0.51	0.561036		0.0021	0.0004	0.0303	0.0153	5.9033e-05	0.0001	7.6462e-06	8.7771e-06	0.0357	0.0173	0.0005	0.0005	1.7046e-05	3.9159e-05	9.71077e-06			0.7712	1.5681	0.9612	1.5179	1.397	0.6903	0.971	1.3746	0.7053		100	100	100
	134			N-acetylmethionine	LC/MS neg	1589	C02712		448580		1.97	0.84	1.14	1.27	0.65	0.73	0.59	0.855978		0.0038	0.0007	0.2072	0.0652	0.3938	0.0905	0.0806	0.0115	0.0317	0.0158	0.0739	0.0279	2.6444e-05	5.1491e-05	0.0384166			1.0704	2.1084	0.8983	1.2208	1.361	0.6945	0.78	1.2505	0.7439		100	100	100
	136			N-formylmethionine	LC/MS neg	2829	C03145		439750		4.19	1.09	1.17	1.79	1.17	1.65				0.0097	0.0015	0.4226	0.1105	0.3793	0.0891	0.0249	0.0043	0.4226	0.1307	0.1854	0.0598						0.5594	2.3418	0.6109	0.6527	1.0031	0.653	0.9216				0	100	33
	138			pipecolate	LC/MS pos early	1444	C00408		849		2.43	2.05	1.46	1.38	1.56	1.95	2.53	1.10347		1.752e-06	2.2183e-06	0.0005	0.0008	0.0002	0.0003	0.0001	6.8171e-05	6.8297e-05	0.0001	4.7599e-05	7.8297e-05	7.6883e-06	2.545e-05	8.46871e-08			0.6431	1.5607	1.3183	0.9389	0.8881	1.0057	1.2563	0.5828	1.4749		100	100	100
	141			saccharopine	LC/MS pos early	1495	C00449	SACCHAROPINE	160556								6.12															2.431e-05	4.877e-05											0.2964	1.8133		0	0	0
	142			S-adenosylhomocysteine (SAH)	LC/MS neg	42382	C00021	ADENOSYL-HOMO-CYS	439155		4.85	0.81	1.46	1.41	0.76	1.18	1.04	0.949606		0.0005	0.0001	0.1425	0.0497	0.0035	0.0022	0.0149	0.0029	0.0385	0.0184	0.3076	0.0917	0.659	0.1215	0.32814			0.9045	4.3849	0.7303	1.3237	1.2769	0.6846	1.0679	0.9525	0.9876		100	100	100
	144			threonine	LC/MS pos early	1284	C00188	THR	6288		7.11	1.83	3.1	3.27	2.11	1.88	1.78	0.662222		5.5715e-07	1.164e-06	3.2954e-06	2.8014e-05	1.1856e-07	1.7828e-06	1.9267e-06	2.8217e-06	5.9015e-06	2.9686e-05	5.2522e-05	8.2281e-05	5.097e-05	7.3356e-05	0.000110835			0.4768	3.3901	0.8733	1.4788	1.5579	1.0068	0.8971	0.72	1.2802		100	100	100
	149			6-oxopiperidine-2-carboxylate	LC/MS neg	43231			3014237		1.73	1.08	1.02	1.93	1.17	1.4	1.08	0.905093		0.0053	0.0009	0.4094	0.1084	0.8026	0.1547	0.002	0.0006	0.4603	0.1397	0.0338	0.0143	0.5214	0.1001	0.000289137			0.8583	1.4879	0.927	0.8715	1.6551	1.0049	1.202	0.9483	1.0282		100	100	100
	160			S-methylmethionine	LC/MS pos early	38127	C05319	CPD-397	458		7.91	1.18	2.74	7.61	1.07	1.64	1.45	0.757107		1.9606e-07	7.4474e-07	0.2469	0.0744	0.0002	0.0002	4.5362e-07	1.1151e-06	0.252	0.0864	0.0003	0.0003	0.0059	0.0023	0.0124996			0.6259	4.9525	0.7379	1.7131	4.7632	0.6674	1.0294	0.8267	1.1949		100	100	100
	161			methionine sulfone	LC/MS pos early	44878			69961		0.98	0.51	0.54	1.03	0.66	1.18	1.58	1.24543		0.68	0.0709	0.0007	0.0011	0.0002	0.0003	0.5048	0.0564	0.0009	0.0009	0.0239	0.0106	0.0029	0.0013	1.15903e-05			1.0484	1.023	0.5351	0.5627	1.0794	0.6868	1.2402	0.8418	1.3284		100	100	100
	168			3-carboxyadipate	LC/MS polar	54723			222467		1.2	1.14	0.49	2.82	1.09	2.19	0.48	0.620805		0.1574	0.0186	0.3124	0.0893	0.0129	0.006	0.0014	0.0004	0.4232	0.1307	0.0151	0.0072	0.0057	0.0022	0.196368			0.8379	1.0048	0.957	0.4105	2.3599	0.9149	1.8362	1.3497	0.6418		100	100	100
	171		Glutamate family (alpha-ketoglutarate derived)	imidazole lactate	LC/MS pos early	15716	C05568		440129		0.16	1.19	0.18	1.18	5.13	0.78				0.0003	8.356e-05	0.288	0.0841	6.0292e-05	0.0001	0.0131	0.0026	8.6331e-08	1.8239e-06	0.0023	0.0016						1.0069	0.1644	1.1977	0.1857	1.185	5.1653	0.7848				100	100	100
	173			1-methylimidazoleacetate	LC/MS pos early	32350	C05828		75810		0.58	0.43	0.47	3.16	1.01	1.08	1.36	1.42038		0.0767	0.0096	0.0232	0.013	0.0256	0.01	0.0071	0.0016	0.7713	0.2105	0.5549	0.148	0.2028	0.0453	0.00651085			0.9616	0.5531	0.4133	0.4472	3.0374	0.9759	1.0412	0.677	0.9181		100	100	0
	176			3-methylhistidine	LC/MS pos early	15677	C01152		64969		1.07	0.75	0.87	3.58	0.84	1.23	2.19	1.3208		0.3843	0.0415	0.0604	0.0263	0.1621	0.0445	3.8812e-05	2.892e-05	0.0363	0.0175	0.0405	0.0164	0.008	0.003	2.31263e-06			1.0293	1.0989	0.7701	0.8954	3.6847	0.8685	1.2651	0.7793	1.7052		100	100	100
	177			4-acetamidobutanoate	LC/MS pos early	1558	C02946		18189		1.46	0.91	0.76	1.32	1.28	1.43	0.25	0.44755		0.0489	0.0064	0.4509	0.1169	0.0156	0.0069	0.029	0.0049	0.009	0.0055	0.0028	0.0018	6.7102e-05	8.4905e-05	8.73502e-05			0.852	1.2458	0.7726	0.646	1.1286	1.088	1.221	1.9037	0.4813		100	100	100
	181			5-aminovalerate	LC/MS pos early	18319	C00431		138		4.08	0.77	1.17	0.76	1.76	0.8				0.0004	0.0001	0.2766	0.0817	0.4095	0.0927	0.1898	0.0241	0.484	0.1444	0.2538	0.0778						1.0749	4.3845	0.8319	1.2567	0.8156	1.8876	0.858				100	100	100
	182			arginine	LC/MS pos early	1638	C00062	ARG	232		7.11	1.93	4.3	1.92	1.9	1.46	1.33	0.615736		3.6209e-10	1.5129e-08	0.0002	0.0004	1.7484e-07	2.1909e-06	6.2078e-08	3.7666e-07	5.02e-06	2.6515e-05	6.9348e-06	2.7378e-05	0.0004	0.0003	0.00038834			0.5259	3.738	1.0171	2.2623	1.0103	0.9973	0.7694	0.8541	1.1387		100	100	100
	183			argininosuccinate	LC/MS pos early	15497	C03406	L-ARGININO-SUCCINATE	16950;828		9.78	2.06	3.75	1.7	1.75	1.39	0.67	0.488262		4.5645e-06	3.9733e-06	0.0004	0.0007	7.3108e-06	3.2366e-05	0.001	0.0003	0.0004	0.0005	0.0033	0.002	0.0008	0.0005	4.04112e-06			0.5782	5.6546	1.1908	2.1686	0.9832	1.0126	0.8058	1.1842	0.7938		100	100	100
	184			carboxyethyl-GABA	LC/MS pos early	40007			2572		0.8	0.74	0.79	1.65	0.99	0.9	0.66	0.914997		0.0025	0.0005	0.0496	0.0227	0.0052	0.003	0.0002	8.0278e-05	0.9132	0.2412	0.0358	0.0147	0.022	0.007	4.33334e-05			1.0958	0.8795	0.8131	0.8674	1.8064	1.0898	0.9809	1.1976	0.7932		100	100	100
	185			citrulline	LC/MS pos early	2132	C00327	L-CITRULLINE	9750		7.31	2.11	6.02	5.65	2.77	1.37	0.58	0.28909		4.2627e-07	9.8949e-07	1.5826e-05	6.4064e-05	7.1069e-08	1.7811e-06	4.0066e-07	1.1151e-06	3.2991e-05	9.9573e-05	0.0006	0.0005	3.006e-05	5.3992e-05	0.000218428			0.3609	2.6391	0.7608	2.1743	2.0394	1.0014	0.4929	1.2484	0.724		100	100	100
	187			dimethylarginine (SDMA + ADMA)	LC/MS pos early	36808	C03626		123831		1.6	1.21	0.95	1.09	1.12	1.42	1.12	0.940078		3.9708e-05	2.0483e-05	0.0015	0.0018	0.1911	0.0504	0.0506	0.0079	0.0306	0.0154	0.0003	0.0003	0.0848	0.0215	1.22509e-06			0.8911	1.429	1.0811	0.847	0.969	0.9968	1.2627	0.9479	1.0614		100	100	100
	189			gamma-aminobutyrate (GABA)	LC/MS pos early	1416	C00334	4-AMINO-BUTYRATE	119		1.98	1.01	1.3	1.46	1.11	1.26	0.83	0.753915		7.9754e-07	1.4489e-06	0.633	0.1478	4.4926e-05	0.0001	3.2506e-06	4.1836e-06	0.0022	0.0018	0.0001	0.0002	0.0035	0.0015	1.87848e-05			0.8039	1.5933	0.8124	1.0479	1.1731	0.8899	1.0148	1.0663	0.8833		100	100	100
	190			glutamate	LC/MS pos early	57	C00025	GLT	611		3.14	0.89	1.15	2.05	0.83	1.36	1.35	1.02618		1.779e-08	1.2389e-07	0.0041	0.0037	0.0006	0.0006	2.5546e-07	8.9118e-07	0.0009	0.0009	2.5292e-05	5.9023e-05	0.0004	0.0003	9.37717e-07			0.878	2.759	0.7795	1.0127	1.7963	0.7329	1.198	0.8556	1.1517		100	100	100
	191			glutamate, gamma-methyl ester	LC/MS pos early	33487			68662		1.25	0.81	0.66	0.74	0.81	0.83	0.54	0.828675		0.0043	0.0007	0.0176	0.0108	0.0001	0.0002	0.0157	0.003	0.3023	0.0992	0.0149	0.0072	0.0207	0.0067	0.0229749			1.2334	1.541	0.9993	0.8082	0.9113	1.0001	1.0261	1.4884	0.807		100	100	100
	192			glutamine	LC/MS pos early	53	C00064	GLN	5961		19.91	1.18	2.4	2.11	0.95	1.51	0.67	0.561328		2.2413e-09	3.4417e-08	0.0095	0.0067	4.8628e-07	4.5702e-06	2.0828e-06	2.9487e-06	0.0869	0.0367	8.0169e-05	0.0001	0.0002	0.0002	1.16948e-08			0.6645	13.2302	0.7845	1.5977	1.4048	0.6302	1.0042	1.1838	0.7885		100	100	100
	193			histamine	LC/MS pos early	1574	C00388		774		1.51	1.05	1.13	1.56	2.13	1.1				0.1006	0.0124	0.6297	0.1475	0.408	0.0927	0.0667	0.0097	0.0134	0.0075	0.5114	0.1383						0.8241	1.2449	0.8687	0.9345	1.2838	1.7571	0.9025				100	100	100
	194			histidine	LC/MS neg	59	C00135	HIS	6274		1.87	1.09	1.35	1.59	0.97	1.23	1.93	1.15837		5.0745e-05	2.4655e-05	0.0078	0.0055	1.5791e-05	5.6536e-05	4.7096e-07	1.1151e-06	0.0875	0.0367	9.7037e-05	0.0001	1.7621e-06	1.1666e-05	3.80731e-08			0.8163	1.5236	0.8912	1.1012	1.301	0.7924	1.0012	0.7047	1.3624		100	100	100
	196			homocitrulline	LC/MS pos early	22138	C02427		65072		2.52	0.92	3.67	2.94	0.63	1.83	0.89	0.533841		0.0028	0.0005	0.5912	0.1424	0.0013	0.0011	0.0001	6.0199e-05	0.0018	0.0016	0.0043	0.0025	0.5001	0.0965	0.094883			0.5955	1.4991	0.5478	2.1837	1.7525	0.378	1.0891	1.1155	0.9939		100	100	100
	197			N-acetylarginine	LC/MS pos early	33953	C02562		67427		2.19	1.43	1.31	0.8	0.8	0.86				3.1243e-05	1.7883e-05	0.0013	0.0016	0.0186	0.0079	0.017	0.0031	0.0327	0.0161	0.2858	0.0856						0.9588	2.1033	1.3754	1.26	0.7651	0.7674	0.8263				100	100	100
	198			N-acetylglutamate	LC/MS polar	15720	C00624	ACETYL-GLU	70914		7.86	1.51	2.52	1.99	0.68	1.35	0.42	0.438301		0.0005	0.0001	0.0311	0.0156	0.0027	0.0019	2.6635e-06	3.6492e-06	0.0001	0.0002	0.0105	0.0053	6.0208e-05	8.0832e-05	2.51733e-06			0.6738	5.2974	1.0186	1.6955	1.3401	0.456	0.9103	1.5373	0.6525		100	100	100
	199			N-acetylglutamine	LC/MS pos early	33943	C02716		182230		11.09	1.2	2.17	1.14	1	1	0.37	0.323713		0.0004	0.0001	0.1846	0.0605	0.0011	0.001	0.2046	0.0258					3.4548e-05	5.718e-05	5.5796e-05			0.4823	5.3466	0.577	1.0464	0.5504	0.4823	0.4823	1.4899	0.5551		0	100	67
	200			N-acetylhistidine	LC/MS pos early	33946	C02997		75619		1.97	1.21	1.21	1.29	1.35	1.36				0.0021	0.0004	0.0254	0.0137	0.02	0.0083	0.0059	0.0014	0.0055	0.0037	0.0139	0.0067						0.7981	1.5753	0.9684	0.9636	1.031	1.0803	1.0835				100	100	100
	201			N-alpha-acetylornithine	LC/MS pos early	32984	C00437	N-ALPHA-ACETYLORNITHINE	439232		1.73	2.14	0.94	0.96	0.69	0.74	0.79	0.999905		5.5768e-05	2.6145e-05	1.5507e-05	6.4064e-05	0.3786	0.0891	0.5336	0.0593	0.0014	0.0014	0.0063	0.0034	0.3011	0.0633	6.50653e-05			1.0564	1.828	2.2561	0.9904	1.0093	0.7288	0.7778	1.0565	0.8314		100	100	100
	202			N-acetylproline	LC/MS pos early	34387			322640		1.21	0.5	0.7	0.8	0.37	0.77	0.97	1.23313		0.001	0.0002	1.1335e-05	5.6679e-05	0.0002	0.0002	0.002	0.0006	2.579e-06	1.7842e-05	0.0013	0.001	0.5823	0.1101	1.85453e-06			1.2885	1.5567	0.6457	0.9046	1.0367	0.4717	0.9926	1.0449	1.0129		100	100	100
	203			ornithine	LC/MS pos early	1493	C00077	L-ORNITHINE	6262		3.56	1.72	1.47	0.7	0.56	0.5	2.17	1.57321		1.5354e-06	2.0048e-06	0.0002	0.0005	0.0003	0.0004	0.0014	0.0004	4.0502e-05	0.0001	0.0002	0.0002	3.5998e-05	5.8126e-05	0.0824886			1.0196	3.6348	1.7544	1.4986	0.7145	0.5722	0.514	0.6481	1.4073		100	100	100
	205			proline	LC/MS pos early	1898	C00148	PRO	145742		3	2.23	1.1	1.04	0.96	3.14	1.3	1.09375		3.24e-06	3.0111e-06	5.073e-06	3.1782e-05	0.0171	0.0075	0.1265	0.0169	0.1366	0.0531	2.821e-06	1.6378e-05	0.0054	0.0021	0.255834			0.9205	2.7583	2.0572	1.0112	0.9615	0.886	2.8898	0.8416	1.0922		100	100	100
	206			pyroglutamine*	LC/MS pos early	46225			134508		1.37	0.67	1.6	2.94	0.91	1.16	1.04	0.849363		0.0642	0.0082	0.0116	0.0078	0.0354	0.0127	0.007	0.0016	0.3437	0.1091	0.2764	0.0837	0.9831	0.1722	4.89366e-08			0.8672	1.1857	0.5826	1.3852	2.5494	0.7922	1.0063	1.021	1.0587		100	100	100
	208			stachydrine	LC/MS pos early	34384	C10172		115244		0.97	1.55	1.46	7.98	5.61	2.71	1.99	0.953326		0.233	0.0263	2.5244e-05	8.9415e-05	1.2766e-05	5.3325e-05	2.3953e-07	8.9118e-07	1.4471e-08	5.6375e-07	1.6291e-07	2.6797e-06	1.4698e-05	3.604e-05	6.55528e-08			0.6536	0.6363	1.0111	0.9566	5.216	3.6667	1.7712	0.6856	1.3615		100	100	100
	210			trans-4-hydroxyproline	LC/MS pos early	32306	C01157	Protein-hydroxyprolines	5810		1.62	1.22	1.58	0.56	0.89	1.57	0.56	0.644938		0.0201	0.0029	2.3915e-05	8.839e-05	1.8638e-06	1.1914e-05	0.0072	0.0016	0.0036	0.0027	0.0265	0.0116	0.0149	0.0051	0.0232852			0.8192	1.3306	1.0031	1.2977	0.4558	0.7255	1.286	1.2702	0.7077		100	100	100
	211			N-methylproline	LC/MS pos early	37431			557		1.98	1.32	1.05	2.48	0.87	1.83				0.0023	0.0005	0.022	0.0127	0.5291	0.114	0.0004	0.0002	0.1631	0.0624	0.0039	0.0024						0.7785	1.544	1.0266	0.8181	1.9295	0.6771	1.4209				100	100	100
	213			trans-urocanate	LC/MS pos early	607	C00785		736715								2.84															3.0175e-05	5.3992e-05											0.5499	1.5604		0	0	0
	214			N-methyl-GABA	LC/MS pos early	39577			1550042;70703		0.93	1.24	1.02	2.38	1.19	1.42	1.81	1.18202		0.01	0.0016	0.0008	0.0012	0.3636	0.0868	1.1737e-05	1.1869e-05	0.0003	0.0005	1.6922e-05	5.061e-05	4.2411e-05	6.3813e-05	1.6301e-07			0.8429	0.7812	1.0472	0.8594	2.0047	1.0055	1.195	0.7131	1.2932		100	100	100
	218			imidazole propionate	LC/MS pos early	40730			70630		0.85	1.34	0.98	5.17	0.94	2.93	0.76	0.481915		0.391	0.0421	0.3614	0.0994	0.966	0.1784	0.0002	0.0001	0.8132	0.2203	0.0085	0.0043	0.0538	0.015	9.54463e-05			0.5223	0.4455	0.6988	0.5118	2.6992	0.4923	1.5298	1.0838	0.8276		25	0	67
	219			cis-urocanate	LC/MS pos early	40410			1549103								1.73															0.0028	0.0013											0.7911	1.3688		0	0	0
	220			1-methylhistidine	LC/MS pos early	30460	C01152		92105		1.07	0.97	0.55	1.9	0.86	1.43	3.52	2.37713		0.822	0.0844	0.8258	0.1786	0.0513	0.0177	0.0362	0.0058	0.3113	0.1012	0.1138	0.04	7.6342e-07	7.2202e-06	0.000131564			1.1182	1.1951	1.0814	0.616	2.128	0.9655	1.6013	0.4704	1.6579		100	100	100
	224			N-delta-acetylornithine	LC/MS pos early	43249			9920500		1.19	0.69	1.05	2.03	0.85	1.29	1.85	1.31575		0.0007	0.0002	0.0113	0.0076	0.2658	0.0673	5.2508e-07	1.1151e-06	0.0132	0.0075	0.0026	0.0018	0.0011	0.0006	0.000177757			0.953	1.1345	0.6598	0.9967	1.9307	0.8132	1.2265	0.7243	1.3408		100	100	100
	227			N-acetyl-1-methylhistidine*	LC/MS pos early	43255					0.53	0.78	0.25	1.6	0.63	0.93	1.33	1.46205		4.984e-05	2.45e-05	0.0741	0.0306	1.4054e-05	5.4142e-05	0.0003	0.0001	0.0002	0.0003	0.2609	0.0795	0.5412	0.1032	2.94852e-05			1.2385	0.6532	0.9644	0.3081	1.9833	0.7772	1.1463	0.8471	1.1302		100	100	100
	228			N-monomethylarginine	LC/MS pos early	43586	C03884		132862		6.97	1.99	3.44	4.96	1.8	2.58	1.71	0.514282		4.0505e-07	9.8949e-07	2.9731e-06	2.8014e-05	2.8942e-07	3.1086e-06	8.0043e-08	4.2495e-07	1.9033e-05	7.2736e-05	5.1009e-07	5.5938e-06	0.0003	0.0002	0.000771587			0.3925	2.7355	0.7828	1.3497	1.9456	0.708	1.0141	0.7632	1.3039		100	100	100
	229			4-guanidinobutanoate	LC/MS pos early	15681	C01035		500		0.92	1.22	0.71	1.4	1.6	1.08	0.73	0.799393		0.1469	0.0175	0.0161	0.0101	0.0009	0.0008	0.002	0.0006	0.0006	0.0007	0.1609	0.0531	0.019	0.0063	1.99579e-07			0.9213	0.8519	1.127	0.6586	1.2857	1.4775	0.9963	1.1525	0.8419		100	100	100
	231			4-imidazoleacetate	LC/MS pos early	32349	C02835		96215		0.7	1.41	0.47	0.86	1.31	1	0.91	0.984285		0.0227	0.0033	0.0019	0.0021	3.4686e-05	9.3138e-05	0.0643	0.0095	0.0033	0.0025	0.9771	0.2364	0.4611	0.0901	5.12805e-07			1.0397	0.7324	1.4674	0.4888	0.8975	1.3645	1.0385	1.0563	0.9584		100	100	100
	237			guanidinoacetate	LC/MS pos early	43802	C00581		763		0.79	1.39	1.03	10.59	1.62	2.67	1	0.7259		4.9605e-05	2.45e-05	1.5042e-05	6.4064e-05	0.5625	0.1191	1.1555e-09	4.9076e-08	0.0002	0.0003	7.9973e-06	3.0358e-05			1.11974e-06			0.7259	0.5699	1.008	0.7493	7.6865	1.1725	1.9364	1	1		100	100	100
	242			beta-guanidinopropanoate	LC/MS pos early	35101	C03065		67701		1.16	1.25	1	1.26	2.05	1.89	1.59	1.39894		0.1563	0.0185	0.0056	0.0046	0.9791	0.1804	0.055	0.0085	2.0337e-05	7.2771e-05	0.0004	0.0004	0.0629	0.017	1.07336e-06			0.8216	0.9511	1.0276	0.821	1.0377	1.6839	1.5523	0.5873	0.9363		100	100	100
	247			2-oxoarginine*	LC/MS pos early	55072	C05935 C03771		558		0.53	1.45	0.22	0.93	1.74	0.93	0.25	0.573766		0.0011	0.0002	0.1055	0.0401	0.0007	0.0007	0.469	0.0531	0.0005	0.0006	0.5589	0.1487	0.0003	0.0002	1.92518e-05			1.0205	0.5434	1.4836	0.2205	0.944	1.7768	0.9492	1.7786	0.439		100	100	100
	249		Branched Chain Amino Acids (OAA derived)	isoleucine	LC/MS pos early	1125	C00407	ILE	6306		5.99	2.19	1.3	3.02	4.5	1.29	2.36	0.778351		9.8978e-09	8.6814e-08	0.0005	0.0009	0.0024	0.0017	2.2606e-07	8.9118e-07	9.0819e-10	9.5937e-08	0.0003	0.0003	2.308e-06	1.3113e-05	0.146393			0.4681	2.8059	1.0271	0.6084	1.4152	2.1085	0.6032	0.6014	1.4191		100	100	100
	253			allo-isoleucine	LC/MS pos early	46552			6950182;99288		1.06	0.71	0.45	2.18	0.91	0.87	1.09	1.12202		0.383	0.0415	0.0245	0.0134	0.0064	0.0035	0.0003	0.0001	0.212	0.0762	0.1082	0.0384	0.2461	0.0533	3.96545e-05			1.0768	1.1429	0.7658	0.4863	2.3491	0.9769	0.9337	0.9597	1.0468		100	100	100
	263		Branched Chain Amino Acids (pyruvate derived)	2,3-dihydroxyisovalerate	LC/MS polar	38276	C04039	DIOH-ISOVALERATE	677		1.85	1.91	0.89	0.56	0.53	0.68	0.3	0.647436		3.7835e-05	2.0011e-05	0.0008	0.0011	0.0936	0.0281	0.0001	7.6651e-05	6.4651e-05	0.0001	0.0041	0.0024	0.0001	0.0001	4.54209e-06			1.0919	2.0251	2.0834	0.97	0.6062	0.5761	0.7474	1.6865	0.509		100	100	100
	266			2-hydroxy-3-methylvalerate	LC/MS neg	36746			164623		2.06	0.9	0.9	1.43	1.45	1.09				0.0018	0.0004	0.391	0.1049	0.391	0.0902	0.2255	0.0278	0.3079	0.1004	0.6757	0.1767						0.7045	1.4502	0.6372	0.6372	1.0086	1.0213	0.7677				25	100	0
	269			3-methyl-2-oxobutyrate	LC/MS polar	44526	C00141	2-KETO-ISOVALERATE	49		7.26	2.09	1.58	1.49	0.99	1.16	1.19	0.765327		4.6543e-07	1.0235e-06	4.8136e-06	3.1782e-05	0.0039	0.0024	3.9668e-05	2.9048e-05	0.8183	0.2208	0.0198	0.009	0.156	0.0362	0.000105246			0.6953	5.0453	1.4501	1.1018	1.035	0.6878	0.8069	0.9085	1.0786		100	100	100
	270			3-methyl-2-oxovalerate	LC/MS neg	15676	C00671	2-KETO-3-METHYL-VALERATE	47		9.27	1.74	0.88	3.02	3.48	1.45	0.9	0.531637		0.0003	9.0728e-05	9.1409e-05	0.0003	0.1367	0.0384	8.5916e-05	5.3663e-05	0.0047	0.0032	0.0418	0.0169	0.3922	0.0782	0.00044573			0.5789	5.3662	1.0089	0.511	1.7481	2.014	0.8366	1.0889	0.9775		100	100	100
	271			4-methyl-2-oxopentanoate	LC/MS neg	22116	C00233	2K-4CH3-PENTANOATE&redirect=T	70		4.67	0.88	0.72	2.46	1.15	1.67	0.56	0.638897		0.0006	0.0001	0.2545	0.0762	0.0054	0.0031	3.8612e-05	2.892e-05	0.1558	0.0601	0.0042	0.0024	0.0069	0.0026	0.00799994			0.9126	4.2594	0.7986	0.6582	2.2461	1.0497	1.5246	1.4284	0.7956		100	100	100
	275			alpha-hydroxyisovalerate	LC/MS polar	46537			99823		1.66	1.1	0.69	0.66	1.07	1.36	0.69	0.720615		0.0537	0.007	0.6158	0.1454	0.183	0.0488	0.0953	0.0133	0.6694	0.1866	0.1291	0.0443	0.078	0.0202	0.0537748			0.8767	1.4563	0.964	0.6023	0.5797	0.9343	1.1883	1.2166	0.8432		100	100	100
	276			beta-hydroxyisovalerate	LC/MS polar	12129			69362		1.23	0.65	0.61	0.58	0.69	0.98	0.8	1.15221		0.0365	0.005	0.022	0.0127	0.0079	0.0042	0.004	0.001	0.0075	0.0049	0.7763	0.1977	0.0528	0.0148	8.05382e-06			1.3217	1.6201	0.8611	0.8127	0.7699	0.913	1.2904	1.1471	0.921		100	100	100
	277			leucine	LC/MS pos early	60	C00123	LEU	6106		3.96	1.28	1.15	2.18	1.73	1.43	1.79	0.9889		7.6617e-07	1.4489e-06	0.0006	0.0009	0.0002	0.0002	2.7277e-07	8.9118e-07	4.2692e-07	4.5098e-06	0.0005	0.0005	4.1989e-05	6.3813e-05	0.00892254			0.7127	2.8247	0.9118	0.8188	1.5551	1.2362	1.0169	0.7207	1.2903		100	100	100
	280			methylsuccinate	LC/MS polar	15745		CPD-2461	10349		7.34	0.9	1.47	1.68	0.95	1.11	1.05	0.922499		0.0001	4.4647e-05	0.466	0.119	0.0005	0.0005	0.0002	8.1623e-05	0.2976	0.0984	0.1807	0.0588	0.2445	0.0532	5.36483e-07			0.8963	6.5758	0.8081	1.3135	1.5014	0.8543	0.9924	0.9716	1.0213		100	100	100
	282			N-acetylleucine	LC/MS neg	1587	C02710		70912		4.56	1.44	1	1.25	2.66	1.53				0.0015	0.0003	0.0266	0.0142			0.1892	0.0241	0.0264	0.0136	0.1889	0.0605						0.5581	2.5464	0.8015	0.5581	0.6996	1.4852	0.8527				0	100	100
	286			valine	LC/MS pos early	1649	C00183	VAL	6287		11.34	2.85	2.64	2.54	2.7	1.54	1.8	0.532339		8.4305e-08	3.7953e-07	4.0903e-07	8.6927e-06	0.0002	0.0003	0.0001	6.8171e-05	1.601e-08	5.6375e-07	8.5888e-05	0.0001	0.0009	0.0005	0.321525			0.3819	4.3302	1.088	1.0073	0.9705	1.0315	0.5893	0.7174	1.2913		100	100	100
	287			2-isopropylmalate	LC/MS polar	15667	C02504	3-CARBOXY-3-HYDROXY-ISOCAPROATE	77		2.87	1.05	1.16	2.22	0.89	0.74	0.92	0.864181		2.9046e-05	1.6856e-05	0.6485	0.1502	0.0308	0.0115	1.5784e-05	1.4897e-05	0.0018	0.0017	0.0001	0.0002	0.7781	0.1412	4.41564e-05			0.9595	2.7562	1.0104	1.1112	2.1286	0.8576	0.7079	1.1103	1.0169		100	100	100
	297			3-methylglutaconate	LC/MS polar	38667			1551553		3.15	2.05	1.25	3.02	0.61	1.03				0.0155	0.0023	0.0464	0.0216	0.4785	0.1054	0.0166	0.0031	0.2534	0.0866	0.6819	0.1776						0.5248	1.6557	1.078	0.6556	1.5826	0.3215	0.5387				100	100	100
	305		Amines and polyamines	5-methylthioadenosine (MTA)	LC/MS pos early	1419	C00170	5-METHYLTHIOADENOSINE	439176		1.7	0.66	1.15	0.63	0.49	0.74	0.96	1.31438		0.0018	0.0004	0.0004	0.0007	0.0529	0.018	0.0001	6.0199e-05	1.3375e-05	5.5636e-05	0.0068	0.0036	0.5845	0.1102	3.79452e-06			1.3178	2.2452	0.8694	1.5199	0.8295	0.6401	0.9752	1.0026	0.9652		100	100	100
	306			agmatine	LC/MS pos early	15496	C00179	AGMATHINE	199		5.29	3.14	1.2	0.65	1.16	1.14	1.02	0.895913		2.2502e-06	2.4742e-06	1.372e-06	1.7455e-05	0.0039	0.0024	2.805e-05	2.4313e-05	0.0076	0.0049	0.0069	0.0036	0.391	0.0782	2.33928e-07			0.8659	4.5835	2.7175	1.0379	0.5612	1.0033	0.983	0.9665	0.9833		100	100	100
	307			putrescine	LC/MS pos early	1408	C00134	PUTRESCINE	1045		12.59	1.57	5.1	2.1	1.16	2.36	1.14	0.61893		0.0014	0.0003	0.1112	0.0416	0.0028	0.0019	0.0361	0.0058	0.8362	0.2236	0.0218	0.0098	0.187	0.0421	0.0161407			0.5022	6.3204	0.7905	2.5606	1.053	0.5838	1.1849	0.8114	0.9218		100	100	100
	308			spermidine	LC/MS pos early	485	C00315	SPERMIDINE	1102		0.93	0.52	1.91	0.31	0.63	0.89	2.48	1.66539		0.8194	0.0843	0.0228	0.0129	0.0199	0.0083	0.0024	0.0007	0.0702	0.0304	0.6306	0.1669	0.0039	0.0016	5.15933e-06			1.1696	1.0873	0.6131	2.2377	0.366	0.7392	1.0388	0.7023	1.7416		100	100	100
	313			N-acetylputrescine	LC/MS pos early	37496	C02714		122356		7.44	1.49	3.01	2.1	1.27	2.51				6.8111e-05	2.9957e-05	0.0296	0.0153	0.0006	0.0006	0.003	0.0008	0.441	0.1347	0.0686	0.0265						0.5303	3.9467	0.7922	1.5983	1.1153	0.6734	1.3312				100	100	100
	314			nicotianamine	LC/MS pos early	43026	C05324		9882882		1.69	1.65	1.13	2.12	0.94	1.76	0.92	0.770846		0.0569	0.0074	0.1336	0.0475	0.6847	0.1365	0.0208	0.0037	0.8635	0.2293	0.0852	0.0317	0.5628	0.1071	0.0331854			0.7784	1.3124	1.2815	0.8819	1.6511	0.7282	1.3665	1.0098	0.9265		100	100	100
	316			N(4)-acetylspermidine	LC/MS pos early	32356			128317		3.34	0.78	1.21	0.22	0.95	1.4				2.4557e-06	2.6309e-06	0.1056	0.0401	0.2271	0.0585	2.9534e-05	2.5088e-05	0.6341	0.1796	0.0052	0.0029						0.9571	3.199	0.7473	1.1546	0.2058	0.9089	1.3413				100	100	100
	319		Glutathione metabolism	5-oxoproline	LC/MS neg	1494	C01879	5-OXOPROLINE	7405		1.3	0.96	0.4	3.35	0.4	2.23	1.98	1.42284		0.0003	8.0806e-05	0.2131	0.0661	2.258e-06	1.3059e-05	7.1234e-07	1.2102e-06	0.0007	0.0008	2.5883e-05	5.9023e-05	2.0293e-05	4.3338e-05	5.1126e-05			0.993	1.2943	0.9526	0.3986	3.3249	0.3943	2.2159	0.6979	1.3818		100	100	100
	331			gamma-glutamylglutamate	LC/MS pos early	36738	C05282		92865		2.28	0.65	0.97	1.05	0.61	1.11	1.35	1.21245		0.0003	8.7615e-05	0.0557	0.0248	0.6823	0.1365	0.4043	0.0468	0.0003	0.0004	0.4434	0.1226	0.0306	0.0092	2.43652e-05			1.0204	2.3234	0.665	0.9884	1.0736	0.6241	1.1329	0.8416	1.1323		100	100	100
	332			gamma-glutamylglutamine	LC/MS pos early	2730	C05283		150914		20.04	0.71	2.17	1.1	0.7	1.04	0.73	0.841494		3.4234e-07	8.9401e-07	0.0122	0.0081	8.7055e-05	0.0002	0.2987	0.0357	0.0427	0.0202	0.7263	0.1867	7.5901e-05	8.8771e-05	4.0975e-07			0.9848	19.7325	0.6956	2.139	1.0814	0.6885	1.0276	1.1703	0.8488		100	100	100
	334			gamma-glutamylhistidine	LC/MS pos early	18245			7017195		1.46	0.75	0.91	1.16	0.83	0.91	5.96	3.42036		0.0001	5.2278e-05	0.0036	0.0034	0.0746	0.0237	0.0126	0.0025	0.0038	0.0028	0.0714	0.0272	2.8445e-05	5.3804e-05	2.13155e-09			1.0586	1.5508	0.7972	0.962	1.2289	0.8798	0.9682	0.3095	1.8458		100	100	100
	335			gamma-glutamylisoleucine*	LC/MS neg	34457			14253342		8.25	1.5	0.65	2.67	4.42	0.82	1.05	0.708202		1.6262e-05	1.0947e-05	0.0209	0.0124	0.1048	0.0309	0.0006	0.0002	0.0026	0.0021	0.1843	0.0596	0.0981	0.0242	0.00686869			0.6735	5.5583	1.01	0.4409	1.8012	2.9756	0.553	0.951	1.0023		100	100	100
	336			gamma-glutamylleucine	LC/MS neg	18369			151023		7.05	0.88	1.03	1.5	1.67	1.09	3.52	1.86905		3.4315e-05	1.9117e-05	0.5233	0.1293	0.8452	0.1609	0.0204	0.0036	0.0121	0.0069	0.3913	0.1103	0.0006	0.0004	0.488835			0.8478	5.9806	0.7453	0.8716	1.2749	1.4123	0.9277	0.4536	1.5972		100	100	100
	338			gamma-glutamylmethionine	LC/MS neg	44872			7009567		8	0.74	1.34	1.88	1.16	2.57	2.07	1.16692		0.0002	5.4104e-05	0.0508	0.0231	0.0084	0.0043	0.0319	0.0054	0.2679	0.0907	0.0035	0.0022	2.8609e-06	1.4569e-05	0.000384025			0.7606	6.0882	0.5655	1.0224	1.4268	0.8811	1.9563	0.6518	1.3497		100	100	67
	339			gamma-glutamylphenylalanine	LC/MS neg	33422			111299		6.22	1.01	0.93	15.52	1.66	1.17	323	129.492		6.5021e-05	2.8937e-05	0.9965	0.2071	0.6841	0.1365	8.3937e-06	9.2524e-06	0.0187	0.01	0.4706	0.1287	1.1388e-06	8.9349e-06	0.00632602			0.8158	5.0733	0.8205	0.7579	12.6602	1.3569	0.9525	0.0063	2.0349		100	100	100
	341			gamma-glutamyltryptophan	LC/MS neg	33947			3989307		4.81	14.58	0.89	19.16	3.51	12.14	1.08	0.200648		6.3028e-05	2.8625e-05	7.5696e-08	6.2183e-06	0.0631	0.0208	3.4285e-08	3.0387e-07	2.0917e-06	1.5783e-05	4.1386e-07	5.1058e-06	0.0966	0.0239	0.0631796			0.1857	0.893	2.7073	0.1651	3.5573	0.6527	2.2543	0.9255	1.0021		100	100	100
	342			gamma-glutamyltyrosine	LC/MS neg	2734			94340		1.09	1	1	4.79	1	1	260.36	45.5641		0.2247	0.0256					0.0006	0.0002					6.435e-07	7.2202e-06	0.23892			0.3554	0.3881	0.3554	0.3554	1.7023	0.3554	0.3554	0.0078	2.0308		0	100	0
	343			gamma-glutamylvaline	LC/MS polar	43829			7015683		12.97	1.24	1.16	1.11	1	1	1.79	1.3616		3.6155e-05	1.9367e-05	0.2187	0.0674	0.4226	0.0949	0.4226	0.0485					0.0581	0.016	#DIV/0!			0.6744	8.7446	0.8373	0.7818	0.7455	0.6744	0.6744	0.4953	0.8886		0	100	67
	346			gamma-glutamyl-alpha-lysine	LC/MS pos early	55015			65254		3.66	1.12	1.28	1.13	1.59	1.32	0.96	0.766136		0.0012	0.0003	0.7019	0.1591	0.1054	0.0309	0.3897	0.0453	0.0329	0.0161	0.0963	0.0351	0.8222	0.1475	0.0184208			0.7751	2.8356	0.869	0.9957	0.8783	1.2353	1.0201	1.0117	0.9682		100	100	100
	355	Carbohydrate	Glycolysis	glucose	LC/MS polar	48152	C00031	CPD-3607	79025		3.38	1.11	1.09	1.06	1.21	1	3.06	1.70174		2.0466e-06	2.3352e-06	0.0856	0.0343	0.2081	0.0543	0.2249	0.0278	0.0098	0.006	0.98	0.2365	3.2168e-06	1.4764e-05	1.047e-06			0.9203	3.109	1.0196	1.002	0.9785	1.113	0.9173	0.5408	1.6569		100	100	100
	357			glucose 6-phosphate	LC/MS polar	31260	C00668	ALPHA-GLC-6-P	5958		0.88	1.05	0.94	1.27	1.82	1.99	0.48	0.616061		0.1538	0.0183	0.7464	0.1652	0.6127	0.1265	0.0532	0.0082	0.0006	0.0006	0.0004	0.0004	0.0153	0.0052	0.00332934			0.8899	0.7798	0.9342	0.8358	1.1306	1.6216	1.7721	1.4445	0.6877		100	100	100
	358			glucuronate	LC/MS polar	15443	C00191	GLUCURONATE	444791		1.61	1.39	1.2	0.97	1.45	1.53	1.21	0.892616		0.1939	0.0224	0.0167	0.0104	0.0023	0.0017	0.4744	0.0536	0.0119	0.0069	0.0002	0.0002	0.0054	0.0021	9.99646e-09			0.8063	1.3017	1.123	0.9697	0.7842	1.1716	1.2316	0.9033	1.0926		100	100	100
	359			Isobar: fructose 1,6-diphosphate, glucose 1,6-diphosphate, myo-inositol 1,4 or 1,3-diphosphate	LC/MS neg	46896		FRUCTOSE-16-DIPHOSPHATE			0.78	1.05	3.34	1.89	1	0.41				0.438	0.0469	0.8133	0.177	0.0003	0.0004	0.0042	0.001	0.9512	0.2475	0.0038	0.0023						0.9058	0.7065	0.9533	3.0216	1.7159	0.9101	0.3676				100	67	100
	360			lactate	LC/MS polar	527	C00186	L-LACTATE	612		0.85	1.79	0.69	0.95	1.47	1.41	1.4	1.22236		0.3271	0.0361	0.3317	0.0933	0.0348	0.0126	0.7569	0.0796	0.0793	0.0339	0.0358	0.0147	0.043	0.0125	0.214286			0.9664	0.8259	1.7339	0.6636	0.9191	1.4201	1.3616	0.7906	1.1032		100	100	100
	361			phosphoenolpyruvate (PEP)	LC/MS pos early	597	C00074	PHOSPHO-ENOL-PYRUVATE	1005		5.08	1	1	3.58	1.91	8.44				0.0004	0.0001					0.0086	0.0018	0.0484	0.0224	9.7216e-06	3.5536e-05						0.2304	1.1696	0.2304	0.2304	0.825	0.4404	1.9449				0	100	0
	363			pyruvate	LC/MS polar	48990	C00022	PYRUVATE	1060		2.21	1.25	1.02	1.22	1.18	1.7	0.4	0.526353		0.0006	0.0001	0.1305	0.0471	0.7474	0.1454	0.0662	0.0097	0.2345	0.0828	0.0045	0.0026	0.0002	0.0002	0.00324824			0.8089	1.7856	1.0087	0.8261	0.9902	0.953	1.374	1.5368	0.608		100	100	100
	369		TCA cycle	aconitate [cis or trans]	LC/MS neg	46173	C00417				1.01	0.86	0.64	1.13	1.42	1.44	0.79	0.834416		0.8105	0.0836	0.0172	0.0106	8.4822e-05	0.0002	0.0855	0.0121	5.382e-05	0.0001	0.0002	0.0002	0.0142	0.0049	5.01855e-06			0.9761	0.9821	0.8411	0.6207	1.1078	1.3845	1.4037	1.1698	0.9251		100	100	100
	370			alpha-ketoglutarate	LC/MS polar	528	C00026	2-ketoglutarate	51		1.13	1.04	0.57	1.29	0.78	1.33	0.19	0.544256		0.0091	0.0015	0.5799	0.14	3.0959e-05	8.9686e-05	0.0004	0.0002	0.0004	0.0005	0.0002	0.0002	9.0769e-06	2.7315e-05	3.52996e-06			0.9703	1.1011	1.0126	0.5531	1.2498	0.7556	1.2894	1.7828	0.3365		100	100	100
	372			citrate	LC/MS neg	1564	C00158	CIT	311		1.11	1.24	0.9	1.13	1.43	1.37	0.89	0.83177		0.0009	0.0002	0.0057	0.0046	0.0006	0.0006	0.0012	0.0004	2.8467e-05	9.1124e-05	1.4383e-05	4.5792e-05	0.0109	0.0038	1.66053e-07			0.8865	0.9857	1.0977	0.7937	1.0027	1.2647	1.2156	1.0658	0.9523		100	100	100
	373			fumarate	LC/MS polar	1643	C00122	FUM	444972		2.02	0.77	0.86	0.69	0.63	0.86	0.88	1.05567		0.0008	0.0002	0.0654	0.0276	0.0034	0.0022	7.2884e-05	4.6203e-05	2.1443e-05	7.3069e-05	0.0028	0.0018	0.3127	0.0653	0.000200052			1.1491	2.3253	0.8825	0.99	0.7945	0.7246	0.9861	1.0885	0.9596		100	100	100
	374			isocitrate	LC/MS pos early	12110	C00311	threo-ds-iso-citrate	1198		0.74	1.02	0.71	0.98	1.28	1.12	1.15	1.08327		0.0003	8.8691e-05	0.505	0.1252	0.0177	0.0077	0.6638	0.0712	0.0016	0.0015	0.0229	0.0103	0.0784	0.0202	1.21274e-06			0.9874	0.7295	1.0066	0.704	0.9686	1.2616	1.1048	0.9115	1.0523		100	100	100
	375			malate	LC/MS neg	1303	C00149	MAL	525		1.14	1.03	0.8	0.6	0.88	0.92	1.01	1.08169		0.0007	0.0002	0.2405	0.0733	0.0002	0.0003	8.4959e-06	9.2524e-06	0.0075	0.0049	0.0039	0.0024	0.7872	0.142	4.86976e-07			1.0871	1.2403	1.1228	0.8687	0.6497	0.9566	0.9948	1.005	1.0162		100	100	100
	376			maleate	LC/MS polar	20676	C01384	MALEATE	444266		0.59	0.73	0.52	0.54	1.05	1.04	1.07	1.46412		0.0031	0.0006	0.0158	0.01	0.0015	0.0012	0.0012	0.0004	0.9503	0.2475	0.8884	0.2198	0.4588	0.0899	2.28364e-06			1.359	0.8076	0.9915	0.7044	0.7315	1.4213	1.4144	0.9282	0.9918		100	100	100
	380			succinate	LC/MS polar	1437	C00042	SUC	1110		1.91	1.19	0.82	1.15	0.82	1.11	0.62	0.719483		5.4135e-05	2.5999e-05	0.0341	0.0169	0.0098	0.0049	0.0595	0.009	0.0377	0.0181	0.0718	0.0272	0.0003	0.0002	0.00118804			0.9177	1.7564	1.0942	0.752	1.0581	0.7521	1.0159	1.2755	0.7956		100	100	100
	383			2-methylcitrate/homocitrate	LC/MS neg	52282					1.2	0.73	0.86	1.43	1.26	1.27	0.81	0.787956		0.0449	0.006	0.0049	0.0043	0.0745	0.0237	0.0047	0.0011	0.0153	0.0084	0.0124	0.0061	0.0017	0.0009	0.795025			0.8714	1.0428	0.6367	0.7459	1.2456	1.0975	1.1092	1.1059	0.8952		100	100	100
	384			isocitric lactone	LC/MS polar	54724			98259		0.92	1.53	1.22	0.45	0.83	0.88	1.29	1.24915		0.0737	0.0093	0.0056	0.0046	0.0012	0.0011	6.5522e-06	7.9511e-06	0.0005	0.0006	0.0045	0.0026	0.0399	0.0117	2.05945e-06			1.0674	0.985	1.6306	1.2978	0.4815	0.8892	0.9404	0.8545	1.1047		100	100	100
	385		Calvin cycle and pentose phosphate	3-phosphoglycerate	LC/MS pos early	1414	C00597	G3P	724		2.82	1.17	1.94	2.65	3.04	6.17	1.51	0.655664		0.0013	0.0003	0.2157	0.0667	0.0039	0.0024	0.0007	0.0003	0.0015	0.0015	5.7938e-05	8.6641e-05	0.0623	0.0169	0.00186444			0.4092	1.1536	0.4808	0.7924	1.0848	1.2421	2.5229	0.6241	0.944		100	100	100
	392			sedoheptulose	LC/MS polar	53237			5459879		0.8	0.78	1.16	0.62	0.57	0.96	0.33	0.728791		0.1066	0.013	0.1989	0.0636	0.1732	0.0465	0.1188	0.0161	0.0064	0.0043	0.7296	0.187	0.001	0.0006	0.00137202			1.1829	0.9444	0.9185	1.3732	0.7315	0.6792	1.1297	1.6231	0.5276		100	100	100
	394		Photorespiration	oxalate (ethanedioate)	LC/MS neg	20694	C00209	OXALATE	971		0.8	0.64	0.99	0.76	0.73	0.77	0.58	1.0025		0.0004	0.0001	0.0009	0.0012	0.5335	0.1146	0.0128	0.0026	0.0001	0.0002	0.0001	0.0002	6.7972e-05	8.4905e-05	3.89306e-05			1.2852	1.0243	0.8242	1.2671	0.9705	0.9318	0.996	1.282	0.7483		100	100	100
	398			glycerate	LC/MS polar	1572	C00258	GLYCERATE	752		1.82	1.01	1.05	0.71	1.1	1.35	1.82	1.17724		6.0359e-06	5.044e-06	0.8523	0.1834	0.1631	0.0445	0.0059	0.0014	0.0627	0.0275	0.0049	0.0027	0.027	0.0083	0.00207503			0.9412	1.716	0.9535	0.9913	0.6711	1.0386	1.2725	0.7995	1.4536		100	100	100
	404		Amino sugar and nucleotide sugar	arabinose	LC/MS polar	575	C00216	D-ARABINOSE	66308		2.13	0.84	1.07	1.08	0.93	1.04	3.84	2.06466		0.0049	0.0009	0.4627	0.1188	0.5555	0.118	0.7131	0.0761	0.6971	0.1933	0.986	0.2374	1.2147e-06	8.9349e-06	0.0359756			0.9132	1.9455	0.7656	0.9803	0.9879	0.8453	0.952	0.4423	1.6981		100	100	100
	407			erythritol	LC/MS polar	20699	C00503	2-C-METHYL-D-ERYTHRITOL-4-PHOSPHATE	222285		2.04	1.03	1.33	0.42	1.43	0.75				0.2252	0.0256	0.7659	0.1682	0.2717	0.0685	0.0693	0.01	0.2641	0.0897	0.5102	0.1383						0.8369	1.7034	0.8587	1.1169	0.3477	1.1963	0.6315				75	100	100
	408			erythronate*	LC/MS polar	42420			2781043		1.89	1.11	0.91	0.93	0.59	0.94	1.16	1.12859		0.0003	9.7368e-05	0.2745	0.0813	0.156	0.0431	0.4613	0.0528	0.0005	0.0006	0.6731	0.1767	0.0586	0.0161	1.53306e-07			1.0304	1.9461	1.1409	0.9359	0.9546	0.603	0.9686	0.913	1.0548		100	100	100
	411			glucosaminate	LC/MS pos early	27681	C03752		73563								0.74															0.0622	0.0169											1.1062	0.8164		0	0	0
	418			N-acetyl-glucosamine 1-phosphate	LC/MS polar	15741	C04256	N-ACETYL-D-GLUCOSAMINE-1-P	440364		0.77	1.47	0.82	0.61	1.54	1.34	0.56	0.721641		0.0032	0.0006	0.0004	0.0007	0.0187	0.0079	9.7863e-05	5.6938e-05	0.0002	0.0003	0.0017	0.0012	0.0013	0.0007	5.24452e-05			0.9797	0.7558	1.4397	0.8032	0.5932	1.5047	1.3079	1.3576	0.759		100	100	100
	419			N-acetylglucosamine 6-phosphate	LC/MS polar	15107	C00357	N-ACETYL-D-GLUCOSAMINE-6-P	439219		5.52	1.95	1.29	0.75	2.89	3.24	0.37	0.313821		8.8151e-05	3.611e-05	0.0026	0.0026	0.0199	0.0083	0.0904	0.0127	0.0003	0.0004	2.6108e-05	5.9023e-05	3.3088e-05	5.6168e-05	1.03415e-07			0.4841	2.6714	0.9434	0.6231	0.3638	1.3978	1.5702	1.5426	0.5783		100	100	100
	423			ribonate	LC/MS polar	27731	C01685		5460677		1.09	1.38	1.27	1.07	0.76	1.59	0.64	0.67393		0.9481	0.0957	0.2815	0.0828	0.0499	0.0173	0.8621	0.0895	0.0411	0.0196	0.0065	0.0035	0.0004	0.0003	0.00282492			0.8505	0.9247	1.1749	1.0799	0.9134	0.6432	1.3496	1.262	0.8095		100	100	100
	424			ribose	LC/MS polar	1471	C00121	RIBOSE	5779		2.64	0.92	0.73	0.39	0.67	0.78	0.88	1.07172		0.0001	3.9894e-05	0.3744	0.1014	0.0784	0.0246	0.0006	0.0002	0.0104	0.0062	0.047	0.0186	0.2183	0.048	0.000166991			1.2074	3.1903	1.1146	0.8764	0.4752	0.8127	0.9455	1.1266	0.9939		100	100	100
	428			UDP-glucose	LC/MS polar	32344	C00029	UDP-GLUCOSE	8629		0.46	0.6	0.46	9.16	4.24	19.97	1.09	0.258457		7.3182e-06	5.6626e-06	0.052	0.0234	7.3182e-06	3.2366e-05	4.2024e-05	3.0063e-05	0.0001	0.0002	6.8332e-10	6.7441e-08	0.1164	0.0279	7.30919e-06			0.2399	0.1097	0.1435	0.1097	2.1981	1.0182	4.79	0.9282	1.011		100	0	100
	430			UDP-N-acetylglucosamine	LC/MS polar	35162	C00043	UDP-N-ACETYL-D-GLUCOSAMINE	445675		1.52	1.39	0.98	1.1	1.71	1.67	0.42	0.487063		0.0038	0.0007	0.0129	0.0084	0.8874	0.1659	0.4638	0.053	0.0013	0.0012	0.0028	0.0018	0.0001	0.0001	1.64303e-06			0.7492	1.1373	1.0409	0.7378	0.8247	1.2806	1.2514	1.5382	0.6396		100	100	100
	433			xylose	LC/MS polar	15581	C00181	XYLOSE	135191		3.6	1.79	1.39	0.71	0.71	0.71	1.16	0.648585		0.0024	0.0005	0.0299	0.0153	0.4602	0.102	0.1822	0.0233	0.1822	0.0685	0.1822	0.0591	0.3514	0.0716	0.373099			0.5823	2.0982	1.0437	0.8111	0.4144	0.4144	0.4144	0.8978	1.0449		75	100	100
	437			UDP-galactose	LC/MS polar	15860	C00052	UDP-GALACTOSE	18068		1	1	1	3.33	1.05	6.72	1.04	0.29985								0.0052	0.0012	0.4226	0.1307	0.0005	0.0004	0.391	0.0782	#DIV/0!			0.2797	0.2797	0.2797	0.2797	0.9312	0.2938	1.88	0.9328	0.9664		0	0	0
	440			arabonate/xylonate	LC/MS polar	48255					0.85	1.4	0.93	0.96	1.04	0.72	1.5	1.31502		0.1018	0.0124	0.0353	0.0171	0.1236	0.0352	0.3084	0.0368	0.5315	0.1564	0.0002	0.0002	0.0012	0.0006	8.76065e-06			1.034	0.8814	1.4428	0.9593	0.9882	1.0724	0.7467	0.7863	1.1794		100	100	100
	442			UDP-N-acetylgalactosamine	LC/MS polar	18396	C00203		439185		0.98	1.25	0.83	0.86	1.38	1.42	0.44	0.661495		0.8724	0.0889	0.1649	0.0556	0.1655	0.0449	0.2045	0.0258	0.008	0.0051	0.0124	0.0061	0.0004	0.0003	4.94128e-05			0.9935	0.9777	1.2393	0.822	0.853	1.3682	1.4143	1.5019	0.6674		100	100	100
	443			arabitol/xylitol	LC/MS polar	48885					1.05	0.82	0.75	0.87	0.94	1.15	0.88	1.02649		0.4814	0.0513	0.0076	0.0055	0.002	0.0015	0.0234	0.0041	0.2093	0.0756	0.0292	0.0126	0.2153	0.0479	5.91967e-06			1.0771	1.1336	0.8831	0.8127	0.9361	1.0144	1.2362	1.0493	0.9256		100	100	100
	445			N-acetylglucosamine/N-acetylgalactosamine	LC/MS pos early	46539					2.1	1.26	0.88	0.68	1.02	1.23	0.64	0.783664		5.8367e-06	4.9771e-06	0.0025	0.0025	0.0143	0.0065	0.001	0.0003	0.5625	0.1641	0.0023	0.0016	0.0002	0.0002	6.51859e-05			0.9585	2.013	1.2121	0.8392	0.6556	0.98	1.1749	1.2231	0.7792		100	100	100
	446			ribulose/xylulose	LC/MS polar	54671					1.58	1.22	0.72	0.47	0.99	1.06	1.55	1.63005		0.0192	0.0028	0.1008	0.0393	0.0722	0.0231	0.0028	0.0008	0.9726	0.2518	0.5361	0.1438	0.0743	0.0196	5.43355e-07			0.9689	1.5343	1.1823	0.694	0.4562	0.9582	1.0248	0.5944	0.9203		100	100	100
	455		Inositol metabolism	chiro-inositol	LC/MS polar	37112	C19891	CPD-8052			0.42	0.66	0.38	0.51	0.69	1.01	0.46	1.13706		0.0002	7.6231e-05	0.006	0.0047	0.0004	0.0004	3.8396e-08	3.0387e-07	0.0065	0.0043	0.8605	0.2139	3.3451e-06	1.4764e-05	4.2206e-10			1.5414	0.6462	1.0143	0.5815	0.7873	1.0635	1.5513	1.3556	0.627		100	100	100
	456			inositol 1-phosphate (I1P)	LC/MS polar	43849	C04006	1-L-MYO-INOSITOL-1-P	440194		1.54	1.09	0.88	1.66	1.2	0.8	0.69	0.637612		0.1847	0.0216	0.717	0.1613	0.5678	0.1193	0.1237	0.0167	0.3137	0.1013	0.3219	0.0943	0.0425	0.0124	0.389869			0.8778	1.348	0.9541	0.7694	1.4593	1.0502	0.7037	1.3767	0.9503		100	100	100
	459			myo-inositol	LC/MS polar	1124	C00137	MYO-INOSITOL	892		1.99	0.9	0.97	0.61	0.56	0.64	0.61	0.829191		1.1008e-06	1.6427e-06	0.0452	0.0211	0.2808	0.0703	8.7929e-05	5.4124e-05	4.0891e-06	2.3679e-05	1.9136e-05	5.2462e-05	0.0002	0.0002	5.21824e-06			1.0777	2.1412	0.9724	1.0484	0.656	0.6016	0.6911	1.2997	0.7894		100	100	100
	461			inositol pentakisphosphate	LC/MS neg	38388	C01284	CPD-534	439468		0.6	0.6	2.37	0.6	0.6	0.6				0.0882	0.0109	0.0882	0.035	0.0219	0.0088	0.0882	0.0124	0.0882	0.0367	0.0882	0.0327						0.6737	0.401	0.401	1.5945	0.401	0.401	0.401				100	0	0
	462			inositol hexakisphosphate	LC/MS neg	39575	C01204	MI-HEXAKISPHOSPHATE	890		0.01	0.01	1.72	0.06	0.02	0.01				7.0967e-05	3.0569e-05	3.8239e-06	2.9551e-05	0.0844	0.026	0.0045	0.0011	0.0006	0.0007	3.32e-06	1.7246e-05						21.3265	0.193	0.254	36.6821	1.1895	0.3454	0.2212				100	0	67
	464			pinitol	LC/MS polar	37086	C03844	CPD-8046	164619		0.44	0.86	0.6	0.39	1.17	1.23	0.93	1.10802		1.6342e-05	1.0947e-05	0.1141	0.0424	0.0002	0.0003	4.992e-06	6.2359e-06	0.0147	0.0081	0.0054	0.003	0.3121	0.0653	1.24188e-09			1.1263	0.4942	0.9712	0.6726	0.4439	1.3158	1.3812	1.0165	0.9475		100	100	100
	468			inositol triphosphate	LC/MS neg	38389	C01243	INOSITOL-1-3-4-TRIPHOSPHATE	439455		0.73	0.73	2.5	0.73	0.73	0.73				0.2464	0.0277	0.2464	0.0744	0.0411	0.0146	0.2464	0.03	0.2464	0.0851	0.2464	0.0762						0.6446	0.4699	0.4699	1.6142	0.4699	0.4699	0.4699				100	0	0
	473		Sucrose, glucose,fructose metabolism	1-kestose	LC/MS polar	22012	C03661	1-KESTOTRIOSE	440080		1	0.81	0.52	1.81	0.81	1.23				0.786	0.0813	0.0236	0.0131	2.9319e-06	1.5746e-05	0.0005	0.0002	0.0011	0.0011	0.0047	0.0026						1.0061	1.0107	0.8142	0.5257	1.8255	0.8162	1.2326				100	100	100
	474			3-deoxyoctulosonate	LC/MS polar	43805		KDO	4636210		1.56	1.15	0.93	1.17	1.23	1.57	0.86	0.767816		0.0002	6.2808e-05	0.1028	0.0396	0.0769	0.0243	0.0047	0.0011	0.0897	0.0369	3.561e-05	6.3902e-05	0.0827	0.0211	0.0166523			0.8393	1.3094	0.9658	0.7828	0.9792	1.0325	1.3171	1.0931	0.9425		100	100	100
	478			erythrulose	LC/MS polar	37427	C02045		5460032		1.75	0.76	0.7	0.6	0.71	0.71	0.23	1.09001		0.0057	0.001	0.1839	0.0605	0.0882	0.0267	0.0076	0.0016	0.113	0.0452	0.112	0.0396	0.0062	0.0024	4.21145e-06			1.3296	2.3206	1.0156	0.9254	0.8012	0.9496	0.9466	1.2198	0.2829		100	100	100
	479			fructose	LC/MS polar	48195	C00095	Fructose	5984		4.38	1.3	1.25	1.12	1.16	0.59	3.02	1.58943		6.2335e-06	5.107e-06	0.0254	0.0137	0.0125	0.0059	0.0134	0.0027	0.0036	0.0027	3.1708e-05	6.364e-05	1.1367e-05	3.272e-05	6.8198e-09			0.8602	3.7678	1.1168	1.0756	0.9638	1.0014	0.5093	0.5412	1.637		100	100	100
	481			galactinol	LC/MS polar	34706	C01235	CPD-458	439451		0.76	3.72	0.9	3.81	3.46	3.24	3.04	0.652345		0.2076	0.0238	0.0015	0.0018	0.6698	0.1354	0.017	0.0031	0.002	0.0018	0.0013	0.001	5.8302e-06	2.1707e-05	0.000200349			0.3325	0.2535	1.2364	0.2991	1.2657	1.1505	1.0767	0.5097	1.5518		75	67	100
	483			galactonate	LC/MS polar	27719	C00880		128869		2.28	1.58	1.12	1.46	1.33	1.06	1.2	0.918216		0.0092	0.0015	0.0096	0.0067	0.0198	0.0083	0.0579	0.0088	0.0075	0.0049	0.2862	0.0856	0.0862	0.0218	0.000166996			0.7949	1.8118	1.2564	0.8913	1.1627	1.0557	0.8409	0.8657	1.0379		100	100	100
	485			galactose 1-phosphate	LC/MS polar	15706	C00446	CPDQT-4	123912		1.31	1.06	1.11	1.6	1.24	1.58	2.46	1.44691		0.1644	0.0193	0.5476	0.1341	0.3803	0.0891	0.0141	0.0028	0.1041	0.0423	0.0172	0.008	0.0002	0.0002	8.98844e-06			0.8557	1.122	0.9031	0.9457	1.3652	1.063	1.3482	0.5914	1.4558		100	100	100
	489			glucoheptose	LC/MS polar	20705			71306729		1.33	0.69	0.3	0.86	1.09	1.07	0.69	1.02251		0.407	0.0437	0.3582	0.0989	0.0056	0.0031	0.6042	0.066	0.9988	0.2567	0.9698	0.2352	0.1108	0.0268	0.0109487			1.181	1.5686	0.8185	0.3516	1.0192	1.2895	1.2679	1.155	0.7969		100	100	100
	491			mannitol/sorbitol	LC/MS polar	46142	C01507	SORBITOL	5780		0.87	1.02	0.49	1.17	1.22	1.35	0.62	0.746704		0.0531	0.0069	0.7371	0.1636	1.4402e-05	5.4142e-05	0.0154	0.0029	0.0061	0.0041	0.0007	0.0006	0.0002	0.0002	0.00010235			0.9572	0.834	0.972	0.467	1.1229	1.1678	1.2965	1.2819	0.7966		100	100	100
	497			maltose	LC/MS polar	15586	C00208	MALTOSE	10991489		0.6	0.76	0.61	0.91	0.93	0.86	3.32	2.51404		0.0018	0.0004	0.0021	0.0023	6.7229e-05	0.0001	0.0497	0.0078	0.0871	0.0367	0.0075	0.0039	6.1048e-05	8.0832e-05	2.97026e-07			1.1552	0.6957	0.8825	0.7016	1.057	1.0706	0.9887	0.4595	1.5265		100	100	100
	500			maltotriose	LC/MS neg	44688	C01835	MALTOTRIOSE	439586		0.83	0.53	0.57	0.98	0.82	0.52	2.48	2.26204		0.0322	0.0044	6.3812e-05	0.0002	0.0002	0.0003	0.7439	0.0786	0.1769	0.067	0.0002	0.0002	0.0006	0.0004	9.02763e-07			1.2543	1.0416	0.6597	0.717	1.2237	1.0258	0.6516	0.5545	1.3743		100	100	100
	504			mannose	LC/MS polar	48153	C00159	L-mannose	18950		1.61	1.12	0.81	1.02	1.02	1.07	2.34	1.54808		0.1875	0.0218	0.1838	0.0605	0.3953	0.0906	0.9324	0.0961	0.7445	0.2048	0.4536	0.1247	0.0068	0.0026	0.00115723			0.9369	1.5089	1.0522	0.7589	0.9551	0.9549	1.001	0.6052	1.4177		100	100	100
	514			raffinose	LC/MS neg	586	C00492	CPD-1099	10542		1.81	2.39	1.09	19.21	5.6	2.83	2.45	0.692777		0.1313	0.0158	0.0201	0.0121	0.8558	0.1617	0.0008	0.0003	0.0021	0.0018	0.355	0.101	4.8705e-05	7.1655e-05	0.00100659			0.4086	0.7385	0.978	0.4447	7.849	2.2878	1.1568	0.5898	1.4437		75	100	100
	520			stachyose	LC/MS polar	15960	C01613	CPD-170	439531		1	1	1	49.27	1.09	1	36.5	0.717082								6.9081e-06	8.1501e-06	0.3517	0.1112			6.9793e-07	7.2202e-06	6.30806e-05			0.0403	0.0403	0.0403	0.0403	1.9854	0.0441	0.0403	0.0562	2.0514		0	0	0
	521			sucrose	LC/MS polar	1519	C00089	SUCROSE	5988		1.78	1.11	0.96	2.23	0.95	1.63	1.33	1.05674		3.1546e-06	3.0111e-06	0.193	0.0624	0.1183	0.034	6.6081e-07	1.2102e-06	0.2023	0.0744	5.6782e-05	8.6635e-05	0.0006	0.0004	8.47952e-06			0.9108	1.6242	1.0131	0.8712	2.0307	0.8675	1.4832	0.8619	1.1502		100	100	100
	545			6-phosphogluconate	LC/MS neg	15442	C00345	CPD-2961	91493		0.69	0.91	1.1	4.99	4.82	8.73				0.1851	0.0216	0.7592	0.1676	0.5083	0.1108	0.0009	0.0003	0.0019	0.0017	0.0006	0.0005						0.2421	0.1669	0.2204	0.2656	1.207	1.168	2.1128				50	0	67
	546			gluconate	LC/MS polar	587	C00257	GLUCONATE	10690		1.25	1.24	0.54	1.06	1.17	1.49	2.86	1.34206		0.207	0.0238	0.3212	0.091	0.0058	0.0032	0.4655	0.053	0.0653	0.0285	0.0042	0.0025	0.022	0.007	6.99245e-05			0.8918	1.1145	1.1032	0.4821	0.9412	1.0433	1.3314	0.6645	1.9014		100	100	100
	553		C5 branched dibasic acid metabolism	citraconate/glutaconate	LC/MS polar	47076					1.39	1.5	1.08	1.1	0.93	0.98	1.11	0.989711		0.1037	0.0126	0.3391	0.0948	0.5868	0.1222	0.4193	0.0484	0.6019	0.1723	0.9273	0.2282	0.2249	0.0491	7.79315e-05			0.9523	1.3204	1.432	1.0329	1.0515	0.8822	0.9316	0.9622	1.0642		100	100	100
	559	Lipids	Free fatty acid	10-heptadecenoate (17:1n7)	LC/MS neg	33971			5312435		3.16	0.85	1.32	1.33	1.26	1.46	0.57	0.580556		0.0109	0.0017	0.7772	0.1698	0.3435	0.0823	0.2867	0.0344	0.3304	0.1057	0.186	0.0598	0.0035	0.0015	0.0170378			0.7733	2.4455	0.6592	1.018	1.0307	0.9758	1.1283	1.332	0.7567		100	100	100
	564			2-hydroxymyristate	LC/MS neg	32413	C13790		1563								1															0.966	0.1701											1.0032	1.0041		0	0	0
	565			2-hydroxypalmitate	LC/MS neg	35675			92836		1.87	1.01	1.12	1.3	1.19	1.39	0.45	0.524125		0.0229	0.0033	0.8759	0.1869	0.4398	0.0981	0.146	0.0192	0.2745	0.0927	0.2097	0.0666	0.004	0.0017	6.59614e-07			0.8549	1.5954	0.8615	0.9586	1.1104	1.0141	1.1848	1.6311	0.7385		100	100	100
	566			2-hydroxystearate	LC/MS neg	17945	C03045		69417								0.47															0.0013	0.0007											1.5486	0.7274		0	0	0
	570			3-hydroxyoctanoate	LC/MS neg	22001			26613		0.92	0.91	0.63	0.65	1.04	0.97	0.71	0.865365		0.3212	0.0355	0.1425	0.0497	0.0013	0.0011	0.0012	0.0004	0.6062	0.1731	0.6934	0.1797	0.0167	0.0056	2.82999e-06			1.0811	0.9914	0.9853	0.6833	0.703	1.1232	1.0495	1.2493	0.8808		100	100	100
	571			3-hydroxypalmitate	LC/MS neg	27503			301590		1.53	0.83	0.88	1.32	0.98	1.3				0.0871	0.0108	0.4008	0.1068	0.5713	0.1196	0.1272	0.017	0.9456	0.2475	0.1627	0.0533						0.9235	1.4092	0.7697	0.81	1.2235	0.9084	1.2012				100	100	100
	573			4-hydroxy-2-nonenal	LC/MS neg	38309			1693		0.59	1.01	0.75	0.76	1.35	1.01	1.21	1.15703		0.0146	0.0022	0.8179	0.1774	0.1807	0.0483	0.0587	0.0089	0.1885	0.0701	0.948	0.2312	0.2898	0.0613	7.79284e-07			1.0927	0.6463	1.1054	0.8231	0.8266	1.4793	1.1081	0.9444	1.1436		100	100	100
	577			8-hydroxyoctanoate	LC/MS neg	21239			69820		2.29	1.37	1.08	1.39	1.25	1.53	0.6	0.556634		0.0131	0.002	0.0017	0.0019	0.4883	0.107	0.005	0.0012	0.1248	0.0492	0.0004	0.0004	0.0022	0.001	0.00121162			0.7455	1.7093	1.0206	0.8086	1.0392	0.9308	1.1397	1.3393	0.8101		100	100	100
	584			caproate (6:0)	LC/MS neg	32489	C01585		8892		1.25	0.79	0.81	1.01	1.05	0.86				0.0275	0.0039	0.0312	0.0156	0.0575	0.0194	0.9807	0.1004	0.8288	0.2222	0.1025	0.0368						1.0636	1.326	0.8368	0.8638	1.0786	1.1118	0.9107				100	100	100
	595			eicosenoate (20:1)	LC/MS neg	33587		CPD-12189	5282768		3.54	0.68	0.78	2.28	1.29	1.78	0.75	0.587038		0.0065	0.0011	0.3129	0.0893	0.5461	0.1163	0.0261	0.0045	0.3202	0.1031	0.0711	0.0272	0.1213	0.029	0.056101			0.7473	2.6446	0.5061	0.5817	1.7071	0.9667	1.3335	1.273	0.9534		100	100	100
	596			erucate (22:1n9)	LC/MS neg	1552	C08316		5281116		1.69	0.72	1.44	1.48	1.48	1.51	0.89	0.741255		0.1227	0.0148	0.5535	0.1352	0.2195	0.0571	0.2078	0.0261	0.2558	0.0872	0.2356	0.0736	0.3361	0.0693	0.118849			0.7798	1.321	0.56	1.1192	1.1542	1.1531	1.176	1.052	0.9343		100	100	100
	607			linoleate (18:2n6)	LC/MS neg	1105	C01595	LINOLEIC_ACID	5280450		1.95	0.87	1.11	1.41	1.05	1.21	0.6	0.692498		0.0353	0.0048	0.6541	0.1511	0.6246	0.1287	0.1413	0.0187	0.7811	0.2127	0.4196	0.1172	0.0441	0.0128	0.126625			0.8382	1.6308	0.7263	0.9273	1.1802	0.8838	1.0178	1.2104	0.7223		100	100	100
	608			linolenate [alpha or gamma; (18:3n3 or 6)]	LC/MS neg	34035	C06426	CPD-8117	5280934		2.03	0.79	0.73	1.29	0.88	0.94	0.3	0.540841		0.0197	0.0029	0.2674	0.0798	0.1726	0.0465	0.2794	0.0337	0.5825	0.1686	0.8235	0.2063	0.0009	0.0005	0.00213163			1.0316	2.098	0.8142	0.7495	1.3342	0.9116	0.971	1.9074	0.564		100	100	100
	619			palmitate (16:0)	LC/MS neg	1336	C00249	PALMITATE	985		2.39	1.05	1.03	1.65	1.3	1.53	0.86	0.689416		0.0287	0.004	0.6834	0.1561	0.715	0.14	0.0688	0.0099	0.244	0.0851	0.0977	0.0353	0.0282	0.0086	0.194533			0.7465	1.7808	0.7857	0.7687	1.2319	0.9691	1.1421	1.0828	0.93		100	100	100
	635			alpha-hydroxycaproate	LC/MS neg	37073			99824		1.41	0.82	1.02	0.67	0.94	1.03				0.031	0.0043	0.2062	0.0652	0.9177	0.1704	0.0232	0.004	0.6515	0.183	0.7151	0.1843						1.0817	1.5241	0.8834	1.1004	0.7273	1.0148	1.118				100	100	100
	646			2-hydroxybutyrate/2-hydroxyisobutyrate	LC/MS polar	52281					1.63	0.88	0.74	0.57	0.76	1.05	0.95	1.17153		0.0201	0.0029	0.485	0.122	0.1437	0.04	0.0183	0.0034	0.3634	0.1139	0.6955	0.1797	0.6793	0.1249	0.000603493			1.0914	1.7819	0.963	0.8104	0.6245	0.83	1.1495	0.9316	0.8886		100	100	100
	647			2-hydroxyglutarate	LC/MS polar	37253	C02630	CPD-381	43		0.95	0.88	0.55	1.59	0.81	1.39	0.91	1.07851		0.3431	0.0376	0.065	0.0276	0.0002	0.0003	0.0007	0.0003	0.0086	0.0053	0.0012	0.0009	0.3498	0.0715	0.00134474			1.0729	1.0154	0.9425	0.5864	1.7056	0.8712	1.487	0.9948	0.9097		100	100	100
	649			oleate/vaccenate (18:1)	LC/MS neg	52285					4.12	0.72	0.82	2.86	1.24	1.72	0.8	0.643192		0.0129	0.002	0.6222	0.1465	0.8891	0.1659	0.033	0.0055	0.3676	0.1149	0.127	0.044	0.0443	0.0128	0.0288624			0.7124	2.9357	0.513	0.5864	2.0352	0.8819	1.2284	1.1076	0.8856		100	100	100
	650			3-hydroxystearate	LC/MS neg	52938			5282907		1.68	0.78	1.12	1.78	1.15	1.38				0.1145	0.0139	0.5617	0.1368	0.5074	0.1108	0.0685	0.0099	0.4376	0.134	0.3136	0.0927						0.8462	1.4222	0.6637	0.9466	1.5066	0.9689	1.168				100	100	100
	653			3-hydroxybutyrate (BHBA)	LC/MS polar	542	C01089	Hydroxy-Butyrates	441		1.54	1.46	0.75	2.01	0.85	0.87				0.16	0.0188	0.4925	0.1232	0.2837	0.0706	0.0202	0.0036	0.593	0.1712	0.668	0.1758						0.7932	1.2254	1.1559	0.5942	1.5958	0.6739	0.6932				75	100	67
	657			3-hydroxyhexanoate	LC/MS neg	53230			151492		0.78	0.86	0.65	0.65	1.11	0.99				0.0253	0.0036	0.0794	0.0323	0.0282	0.0108	0.0021	0.0006	0.4663	0.1401	0.9075	0.2239						1.1632	0.904	0.9955	0.7591	0.7526	1.2856	1.1519				100	100	100
	660			2-hydroxyoleic acid	LC/MS neg	54920			9796304								0.41															0.0028	0.0013											1.7019	0.6964		0	0	0
	663		Fatty acid amide	oleoyl ethanolamide	LC/MS neg	38102			5283454		5.72	0.62	1.01	2.3	1.04	1.34	0.35	0.463623		0.0024	0.0005	0.239	0.0731	0.8787	0.1648	0.0326	0.0054	0.8194	0.2208	0.6769	0.1767	0.0113	0.004	0.00752527			0.7991	4.5704	0.4945	0.8103	1.8398	0.8325	1.073	1.7236	0.6106		75	100	67
	671			linoleoyl ethanolamide	LC/MS neg	52608			5283446		1.46	0.86	0.8	1.06	1.43	1.34	0.69	0.628167		0.2995	0.0332	0.5668	0.1377	0.3366	0.0814	0.7166	0.0762	0.228	0.0808	0.1566	0.052	0.3236	0.0674	0.38921			0.8305	1.2127	0.7182	0.6641	0.8799	1.1908	1.1121	1.3221	0.9106		50	100	33
	672		Oxylipins	13-HODE + 9-HODE	LC/MS neg	37752			43013		2.29	0.85	1.27	1.07	1.05	0.94	0.52	0.710359		0.0023	0.0004	0.1642	0.0556	0.2392	0.0612	0.5	0.056	0.751	0.2061	0.6944	0.1797	0.0014	0.0007	0.000250715			1.0026	2.2988	0.855	1.2689	1.0755	1.0487	0.9418	1.4114	0.7395		100	100	100
	675			12,13-DiHOME	LC/MS neg	38395	C14829	CPD-13086	10236635		1.97	0.92	0.96	1.06	1.19	1.19	0.58	0.694472		0.0733	0.0093	0.6155	0.1454	0.7972	0.1541	0.8232	0.0861	0.3439	0.1091	0.4943	0.1348	0.0034	0.0015	0.124053			0.9649	1.9053	0.8904	0.927	1.0234	1.146	1.1501	1.3894	0.8066		100	100	100
	676			9,10-DiHOME	LC/MS neg	38399	C14828		9966640		2.01	0.82	1.11	1.03	1.29	1.22	0.57	0.640895		0.0762	0.0096	0.7091	0.1599	0.6449	0.1314	0.9672	0.0992	0.4854	0.1444	0.4701	0.1287	0.001	0.0006	0.203474			0.8538	1.7203	0.6986	0.9474	0.8759	1.1009	1.0429	1.3322	0.7629		100	100	100
	686			13-HOTrE	LC/MS pos late	46109					2.36	1.14	1.3	1.57	1.06	1.09	0.47	0.642516		3.5675e-05	1.9367e-05	0.0846	0.0342	0.0039	0.0024	0.0003	0.0001	0.2449	0.0851	0.1234	0.0429	8.8997e-05	9.9863e-05	1.22444e-06			0.8868	2.0967	1.013	1.1543	1.3898	0.9409	0.9694	1.3802	0.6488		100	100	100
	699		Fatty acid ester	palmitoylcholine	LC/MS pos late	52944			151731		1.52	1.19	1.12	0.86	1.08	1.24	0.86	0.843008		0.0009	0.0002	0.1298	0.0471	0.0909	0.0275	0.151	0.0197	0.3044	0.0996	0.0131	0.0064	0.2182	0.048	8.78708e-05			0.9091	1.3851	1.0814	1.0189	0.7782	0.9834	1.1298	1.0784	0.9249		100	100	100
	700			oleoylcholine	LC/MS pos late	53260					2.69	0.81	0.9	1.08	0.81	0.93				4.899e-05	2.45e-05	0.2007	0.0639	0.3717	0.0884	0.894	0.0924	0.1026	0.0418	0.517	0.1394						1.0656	2.8636	0.8609	0.9604	1.1509	0.8657	0.9911				100	100	100
	709		Glycerolipids	1-linoleoylglycerol (18:2)	LC/MS neg	27447			5283469		1.88	1.04	3.69	2.94	0.58	2.16	0.62	0.452629		0.6806	0.0709	0.931	0.1959	0.4796	0.1054	0.2144	0.0268	0.3527	0.1112	0.5426	0.1451	0.132	0.0313	0.00999008			0.6163	1.1602	0.6387	2.2721	1.8124	0.3571	1.329	1.3616	0.8508		50	67	33
	711			1-oleoylglycerol (18:1)	LC/MS neg	21184			5283468		5.7	0.54	1.22	0.89	0.71	0.73	0.72	0.898135		0.0009	0.0002	0.075	0.0308	0.1871	0.0495	0.4772	0.0537	0.1133	0.0452	0.1373	0.0464	0.2841	0.0603	0.0664584			1.1656	6.6452	0.6271	1.4187	1.0359	0.8319	0.8492	1.2978	0.9398		100	100	100
	718			2-oleoylglycerol (18:1)	LC/MS neg	21232			5319879		8.39	0.7	1.25	1.48	0.99	1.2	0.79	0.768333		0.0018	0.0004	0.4624	0.1188	0.3162	0.0772	0.1738	0.0225	0.7874	0.2138	0.4204	0.1172	0.2939	0.062	0.00406016			0.8162	6.8449	0.5681	1.0208	1.2088	0.8079	0.9801	1.0623	0.8346		100	100	100
	729			glycerol	LC/MS neg	15122	C00116	GLYCEROL	753		1.99	0.94	0.9	0.67	0.92	0.97	0.61	0.852994		0.0003	9.1084e-05	0.4713	0.1192	0.2368	0.0608	0.0054	0.0013	0.3595	0.113	0.7643	0.1954	0.0047	0.0019	0.000471272			1.0514	2.0885	0.9922	0.9437	0.7046	0.9694	1.0246	1.2326	0.746		100	100	100
	730			1-oleoyl-GPG (18:1)*	LC/MS polar	45968					3.95	0.92	1.15	0.84	0.87	0.57				0.0004	0.0001	0.2526	0.0759	0.4249	0.0951	0.152	0.0198	0.2776	0.0934	0.0001	0.0002						1.049	4.1393	0.9646	1.204	0.8829	0.9135	0.6027				100	100	100
	735			oleoyl-linoleoyl-glycerol (18:1/18:2) [2]	LC/MS pos late	46799					1.58	0.55	1.18	1.26	0.55	1.06	0.87	0.813966		0.0649	0.0083	0.0081	0.0058	0.1267	0.0358	0.0101	0.0021	0.0247	0.0128	0.8826	0.2189	0.3255	0.0676	0.000557552			0.9267	1.4678	0.5142	1.0966	1.1702	0.507	0.9809	1.1385	0.9932		100	100	100
	736			palmitoyl-linoleoyl-glycerol (16:0/18:2) [1]*	LC/MS pos late	52633			9543695		1.47	0.58	1.44	1.04	0.49	0.9	0.75	0.856476		0.0009	0.0002	0.0006	0.001	0.0016	0.0012	0.5347	0.0593	0.0116	0.0067	0.3354	0.0976	0.1091	0.0265	0.00711486			1.027	1.5048	0.595	1.4815	1.0724	0.5053	0.9292	1.1991	0.8942		100	100	100
	737			palmitoyl-linoleoyl-glycerol (16:0/18:2) [2]*	LC/MS pos late	52634					1.04	0.87	1.31	1.54	0.9	1.36	0.91	0.832845		0.9055	0.0916	0.2953	0.0857	0.0529	0.018	0.0042	0.001	0.4735	0.1417	0.352	0.1008	0.4971	0.0962	0.879486			0.9098	0.9507	0.7915	1.1905	1.397	0.8212	1.2368	1.0924	0.9933		100	100	100
	743			diacylglycerol (16:1/18:2 [2], 16:0/18:3 [1])*	LC/MS pos late	54966					2.05	0.75	2.19	1.61	0.62	1.12	0.63	0.641923		0.002	0.0004	0.2893	0.0842	0.0017	0.0013	0.0052	0.0012	0.0101	0.0061	0.8153	0.2058	0.1612	0.0373	0.000397618			0.8397	1.7189	0.6278	1.8362	1.3514	0.5192	0.9412	1.3081	0.8205		100	100	100
	744			linolenoyl-linolenoyl-glycerol (18:3/18:3) [1]*	LC/MS pos late	54951											0.48															0.0083	0.003											1.2066	0.5788		0	0	0
	745			linolenoyl-linolenoyl-glycerol (18:3/18:3) [2]*	LC/MS pos late	54952					1.02	0.49	1.72	1.31	0.45	0.67	0.72	0.812196		0.7318	0.0761	8.9982e-05	0.0003	0.0013	0.0011	0.1817	0.0233	7.5963e-05	0.0001	0.0015	0.0011	0.0889	0.0224	0.00098725			1.0202	1.0416	0.499	1.7554	1.3414	0.4576	0.6872	1.2561	0.9026		100	100	100
	746			linoleoyl-linolenoyl-glycerol (18:2/18:3) [1]*	LC/MS pos late	54963					1.12	0.48	1.31	0.92	0.35	0.75	0.6	0.82588		0.3764	0.041	0.0022	0.0023	0.1069	0.0312	0.0774	0.0111	2.7024e-06	1.7842e-05	0.0397	0.0162	0.0083	0.003	0.053284			1.0767	1.2046	0.5165	1.4117	0.9946	0.3793	0.8048	1.3037	0.7777		100	100	100
	747			linoleoyl-linolenoyl-glycerol (18:2/18:3) [2]*	LC/MS pos late	54964					1.1	0.68	1.34	1.44	0.65	1.17	0.82	0.768785		0.0147	0.0022	0.0001	0.0003	0.0007	0.0007	0.0026	0.0007	4.1556e-05	0.0001	0.0042	0.0024	0.2549	0.0548	0.167198			0.9157	1.0052	0.623	1.2314	1.3186	0.5973	1.0724	1.1911	0.9798		100	100	100
	748			linoleoyl-linoleoyl-glycerol (18:2/18:2) [1]*	LC/MS pos late	54968					1.26	0.44	1.59	0.87	0.46	0.67				0.2832	0.0315	0.0061	0.0047	0.0379	0.0136	0.5617	0.0618	0.0124	0.0071	0.3145	0.0927						1.1612	1.4595	0.5075	1.8461	1.0045	0.5323	0.7785				100	100	100
	749			linoleoyl-linoleoyl-glycerol (18:2/18:2) [2]*	LC/MS pos late	54969					0.61	0.68	0.98	0.89	0.94	0.91				0.0022	0.0004	0.027	0.0143	0.8273	0.1579	0.3741	0.0437	0.5656	0.1646	0.4389	0.1217						1.1526	0.7027	0.7873	1.1241	1.022	1.0792	1.0504				100	100	100
	750			oleoyl-linolenoyl-glycerol (18:1/18:3) [2]*	LC/MS pos late	54970					2.48	0.75	1.48	1.7	0.75	1.14	0.71	0.549096		0.0078	0.0013	0.1878	0.0612	0.0649	0.0212	0.0322	0.0054	0.1878	0.0701	0.3549	0.101	0.0781	0.0202	0.0102105			0.6867	1.7047	0.5132	1.0179	1.1703	0.5132	0.7854	1.2506	0.8931		50	100	33
	752			oleoyl-oleoyl-glycerol (18:1/18:1) [2]*	LC/MS pos late	54946					3.18	0.91	0.98	1.5	0.65	1.14	1.34	1.18984		3.574e-06	3.2464e-06	0.303	0.0876	0.8091	0.1552	0.0121	0.0025	0.0342	0.0167	0.3922	0.1103	0.1068	0.026	0.0017904			1.0097	3.2078	0.9177	0.991	1.51	0.6519	1.1558	0.8486	1.1372		100	100	100
	755			palmitoyl-linolenoyl-glycerol (16:0/18:3) [2]*	LC/MS pos late	54965					2.15	0.89	1.74	2.04	0.8	1.61	0.71	0.493802		0.0133	0.002	0.6622	0.1521	0.0317	0.0117	0.0117	0.0024	0.2989	0.0984	0.0436	0.0174	0.0381	0.0113	1.65123e-05			0.6453	1.3892	0.5755	1.1242	1.3195	0.5133	1.0386	1.3068	0.9298		100	100	100
	756			palmitoyl-oleoyl-glycerol (16:0/18:1) [2]*	LC/MS pos late	54942					2.62	1.09	1.21	1.91	0.79	1.14	0.57	0.649755		0.0003	9.0728e-05	0.271	0.0806	0.0341	0.0125	0.0003	0.0001	0.0572	0.0258	0.1303	0.0445	0.0102	0.0036	0.0255613			0.876	2.2987	0.9509	1.0633	1.6741	0.695	0.995	1.3482	0.765		100	100	100
	757			stearoyl-linoleoyl-glycerol (18:0/18:2) [2]*	LC/MS pos late	54947					0.86	0.73	1.17	0.92	0.85	0.9	0.69	0.865169		0.0279	0.0039	0.022	0.0127	0.0106	0.0052	0.286	0.0344	0.1213	0.048	0.1626	0.0533	0.0839	0.0214	0.00216855			1.078	0.9247	0.7915	1.2564	0.9949	0.915	0.9688	1.246	0.8604		100	100	100
	760			palmitoyl-oleoyl-glycerol (16:0/18:1) [1]*	LC/MS pos late	54943					2.86	0.77	1.12	0.71	0.48	0.54	0.31	1.64699		0.0942	0.0116	0.2084	0.0653	0.8666	0.1633	0.3398	0.0402	0.0083	0.0052	0.0632	0.0246	0.1833	0.0416	0.26587			1.1076	3.1639	0.8555	1.2459	0.7899	0.5329	0.5996	0.6725	0.2113		100	100	100
	764			oleoyl-linolenoyl-glycerol (18:1/18:3) [1]*	LC/MS pos late	57349											0.6															0.2451	0.0532											1.2803	0.773		0	0	0
	765			stearoyl-linolenoyl-glycerol (18:0/18:3) [2]*	LC/MS pos late	57326					1.22	0.89	1.36	1.35	0.67	1.06	0.48	0.627386		0.858	0.0877	0.5029	0.125	0.3125	0.0768	0.0593	0.009	0.1572	0.0604	0.9485	0.2312	0.0046	0.0019	1.12347e-05			0.904	1.0992	0.8023	1.2294	1.2165	0.6028	0.9624	1.4409	0.6864		100	100	100
	768		Phospholipids	1-linoleoyl-GPC (18:2)	LC/MS pos late	34419	C04100		11988421		0.64	0.76	0.69	1.62	1.34	1.15	0.84	1.13899		0.0029	0.0005	0.0348	0.0169	0.1483	0.0411	0.0035	0.0009	0.1266	0.0497	0.1352	0.046	0.1832	0.0416	1.40574e-05			1.0047	0.644	0.7651	0.6938	1.6313	1.3426	1.1594	0.8821	0.7414		100	100	100
	769			1-linoleoyl-GPE (18:2)*	LC/MS neg	32635			52925130		3.11	1.18	0.81	3.46	1.82	3.45	0.31	0.263097		0.0028	0.0005	0.4942	0.1232	0.391	0.0902	0.0049	0.0012	0.0759	0.0326	0.0033	0.002	0.0064	0.0025	0.00133252			0.4123	1.2838	0.4846	0.332	1.426	0.7523	1.4238	1.5671	0.4871		25	100	100
	770			1-linoleoyl-GPI (18:2)*	LC/MS neg	36594					2.92	2	0.74	2.72	2.83	4.02				0.0024	0.0005	0.0146	0.0094	0.2004	0.0525	0.0045	0.0011	0.0028	0.0022	0.0056	0.0031						0.4243	1.2378	0.8475	0.3142	1.1554	1.1996	1.7041				100	100	100
	773			1-oleoyl-GPC (18:1)	LC/MS neg	48258			16081932		7.13	1.08	1.1	2.51	1.33	2.06				0.0008	0.0002	0.6389	0.1484	0.5645	0.1192	0.0167	0.0031	0.2831	0.0946	0.0582	0.0228						0.7404	5.2811	0.7965	0.8161	1.8571	0.983	1.5241				100	100	100
	774			1-oleoyl-GPE (18:1)	LC/MS pos late	35628			9547071		6.85	1	1.42	1.24	0.88	0.97	0.26	0.502382		7.8645e-06	5.9746e-06	0.9774	0.2037	0.0122	0.0058	0.0654	0.0096	0.239	0.0842	0.8096	0.2049	0.0001	0.0001	0.00639236			0.8857	6.0681	0.8873	1.2612	1.0979	0.7778	0.8611	1.763	0.4664		75	100	67
	775			1-oleoyl-GPI (18:1)*	LC/MS neg	36602					4.62	0.76	1.46	1.2	0.61	1.08				0.0017	0.0003	0.0753	0.0308	0.0105	0.0051	0.2629	0.0319	0.1141	0.0453	0.9474	0.2312						0.9397	4.3444	0.7154	1.3676	1.13	0.5723	1.0109				100	100	100
	777			1-palmitoyl-GPA (16:0)	LC/MS polar	34428	C04036		6419701		1.54	0.85	0.89	0.49	0.6	0.47	0.67	0.891744		0.0007	0.0002	0.0688	0.0288	0.1145	0.0332	9.1745e-05	5.4882e-05	0.0004	0.0005	0.0005	0.0005	0.032	0.0095	2.3937e-05			1.173	1.8113	0.9994	1.0436	0.5791	0.7076	0.552	1.3154	0.8771		100	100	100
	778			1-palmitoyl-GPC (16:0)	LC/MS pos late	33955		2-Acylglycero-Phosphocholines	86554		1.85	1.37	1.04	1.17	1.09	1.32	0.27	0.47344		3.8461e-05	2.0088e-05	0.0004	0.0007	0.1164	0.0337	0.0194	0.0035	0.0821	0.035	0.0009	0.0007	7.643e-05	8.8771e-05	0.000246128			0.8565	1.587	1.1746	0.8867	1.0033	0.9312	1.1326	1.8091	0.4848		100	100	100
	779			1-palmitoyl-GPE (16:0)	LC/MS pos late	35631		2-Lysophosphatidylcholines	9547069		1.81	1.3	1.07	1.04	0.99	1.19	0.25	0.509996		1.4239e-06	1.9192e-06	0.0099	0.0067	0.043	0.0151	0.1455	0.0192	0.7074	0.1951	0.0005	0.0005	2.4278e-05	4.877e-05	0.28292			0.9286	1.6844	1.2041	0.9914	0.9661	0.9158	1.1061	1.8208	0.4612		100	100	100
	780			1-palmitoyl-GPI (16:0)*	LC/MS neg	35305					2.91	1.09	1.22	1.17	1.04	1.71	0.77	0.942388		0.0101	0.0016	0.205	0.065	0.0634	0.0208	0.1038	0.0143	0.993	0.2558	0.092	0.0338	0.269	0.0576	3.49647e-05			0.8604	2.5018	0.9414	1.0466	1.0058	0.8935	1.4724	0.913	0.7056		100	100	100
	781			1-stearoyl-GPC (18:0)	LC/MS pos late	33961			497299		1.58	1.05	1.07	0.84	0.93	0.99	0.3	0.633971		0.0002	6.925e-05	0.3661	0.1001	0.1251	0.0355	0.0212	0.0037	0.2404	0.0844	0.8262	0.2064	0.0024	0.0011	3.99682e-06			0.9902	1.5655	1.0401	1.0625	0.8293	0.9178	0.979	1.5619	0.4733		100	100	100
	782			1-stearoyl-GPE (18:0)	LC/MS pos late	42398			9547068		1.49	1.15	1.06	0.7	0.99	0.94	0.26	0.92414		0.0003	8.9012e-05	0.0293	0.0153	0.2229	0.0578	0.0008	0.0003	0.9225	0.2424	0.4243	0.118	7.5165e-07	7.2202e-06	0.446962			0.9697	1.4445	1.112	1.0326	0.675	0.9642	0.9102	1.0493	0.2684		100	100	100
	788			2-palmitoyl-GPC (16:0)*	LC/MS neg	35253			15061532		3.38	1.53	0.94	2.2	1.38	2.38				0.0182	0.0027	0.3559	0.0985	0.9223	0.1708	0.0563	0.0086	0.4603	0.1397	0.0498	0.0197						0.569	1.925	0.8697	0.5324	1.25	0.7874	1.357				100	100	100
	792			glycerol 3-phosphate	LC/MS pos early	43847	C00093	GLYCEROL-3P	754		2.08	1.02	1.19	1.05	1.34	1.37	0.51	0.631873		1.8981e-05	1.2202e-05	0.6022	0.1438	0.0151	0.0068	0.1289	0.0172	0.0003	0.0005	0.0004	0.0004	1.3166e-05	3.4371e-05	6.10508e-05			0.8584	1.7818	0.8741	1.0245	0.9004	1.1488	1.1787	1.3585	0.693		100	100	100
	793			glycerophosphoethanolamine	LC/MS pos early	37455	C01233		123874		1.38	1.32	0.9	1.23	1.6	1.73				0.0025	0.0005	0.0031	0.003	0.2257	0.0583	0.0068	0.0015	0.0003	0.0005	0.0006	0.0005						0.7772	1.0734	1.0265	0.6974	0.9588	1.2402	1.3444				100	100	100
	794			glycerophosphorylcholine (GPC)	LC/MS pos early	15990	C00670	SN-3-GLYCEROPHOSPHOCHOLINE	71920		1.21	1.5	0.91	1.67	1.52	1.85				0.0001	5.3261e-05	1.9814e-05	7.6561e-05	0.0079	0.0042	2.2399e-05	1.9819e-05	3.5773e-06	2.2229e-05	2.5354e-06	1.6378e-05						0.6696	0.8126	1.0057	0.6061	1.1158	1.0195	1.2419				100	100	100
	801			phosphoethanolamine	LC/MS polar	1600	C00346	PHOSPHORYL-ETHANOLAMINE	1015		2.98	1.58	2.32	1.96	3.55	6.15	0.43	0.305578		0.001	0.0002	0.029	0.0153	0.0029	0.0019	0.0071	0.0016	0.0014	0.0013	0.0002	0.0003	9.3342e-05	0.0001	6.62763e-06			0.4591	1.3664	0.7271	1.063	0.8994	1.6276	2.8227	1.5024	0.6407		100	100	100
	812			1-stearoyl-GPI (18:0)	LC/MS neg	19324					1.8	0.87	1.07	0.95	1.17	1.56				0.0123	0.0019	0.4707	0.1192	0.7009	0.1387	0.7929	0.0832	0.4668	0.1401	0.148	0.0496						0.9677	1.7436	0.8384	1.0345	0.9154	1.1328	1.5095				100	100	100
	820			1-palmitoyl-GPG (16:0)*	LC/MS neg	45970			3300276		2.04	0.94	1.05	2.2	1.36	1.32	0.42	0.410483		0.0263	0.0037	0.9603	0.2006	0.8068	0.1551	0.02	0.0036	0.2477	0.0852	0.2779	0.0839	0.0049	0.002	1.51754e-05			0.7158	1.4607	0.6743	0.7521	1.5731	0.9758	0.9447	1.7438	0.7252		100	100	100
	835			1-oleoyl-GPA (18:1)	LC/MS pos late	36812			5497152		3.03	0.7	0.93	0.4	0.69	0.5				0.0105	0.0016	0.0147	0.0094	0.6436	0.1314	0.0198	0.0036	0.0082	0.0052	0.0002	0.0002						1.3372	4.0529	0.9387	1.2492	0.5303	0.9212	0.6627				100	100	100
	836			1-stearoyl-GPA (18:0)	LC/MS neg	36810			89567		1.55	0.6	0.94	0.54	0.76	0.49				0.1439	0.0172	0.3423	0.0954	0.8562	0.1617	0.2452	0.0299	0.6497	0.183	0.1367	0.0464						1.3408	2.0781	0.8046	1.2667	0.7256	1.0167	0.6511				100	100	100
	837			glycerophosphoinositol*	LC/MS neg	52307					0.59	1.17	0.72	1.49	1.7	1.49	1.4	1.08773		0.0004	0.0001	0.0586	0.0258	0.0156	0.0069	0.0004	0.0002	1.3694e-05	5.5636e-05	0.0024	0.0017	0.0204	0.0066	8.74218e-06			0.8902	0.5272	1.0433	0.6371	1.324	1.5091	1.3272	0.8184	1.1466		100	100	100
	850			1-palmitoyl-2-linoleoyl-GPC (16:0/18:2)	LC/MS pos late	42446			5287971		1.09	1.16	1.24	1.98	1.33	2.24	0.8	0.696492		0.0524	0.0069	0.1154	0.0427	0.0026	0.0018	0.0217	0.0038	0.0004	0.0005	1.8615e-05	5.2462e-05	0.0952	0.0237	8.36304e-05			0.808	0.8788	0.936	1.0036	1.596	1.0778	1.8103	1.1601	0.9242		100	100	100
	851			1-palmitoyl-2-linoleoyl-GPE (16:0/18:2)	LC/MS pos late	42449			9546747		1.14	1.04	1.25	1.96	1.27	2.25	0.72	0.671639		0.0066	0.0011	0.3732	0.1014	0.0007	0.0007	0.0211	0.0037	0.0172	0.0092	2.6663e-06	1.6378e-05	0.0099	0.0035	0.00010553			0.8329	0.9477	0.8684	1.0423	1.6288	1.0553	1.871	1.2401	0.8924		100	100	100
	852			1-palmitoyl-2-linoleoyl-GPI (16:0/18:2)	LC/MS pos late	52450					1.2	1.08	1.12	1.25	1.31	1.5	1.51	1.06228		0.0003	9.4245e-05	0.0546	0.0244	0.0034	0.0022	0.0615	0.0092	5.1469e-05	0.0001	4.2499e-05	7.2319e-05	0.0095	0.0034	3.92451e-05			0.8665	1.037	0.9374	0.9679	1.0834	1.1383	1.2995	0.8157	1.2341		100	100	100
	853			1-oleoyl-2-linoleoyl-GPI (18:1/18:2)*	LC/MS pos late	52451					1.46	0.66	1.01	1.2	0.71	1.22	1.84	1.43495		0.0003	9.5311e-05	0.0021	0.0023	0.6947	0.1378	0.1093	0.0149	4.8094e-05	0.0001	0.0005	0.0005	0.0203	0.0066	0.000335273			0.9706	1.4138	0.6433	0.9799	1.1688	0.6917	1.1876	0.6764	1.2474		100	100	100
	855			1-palmitoyl-2-oleoyl-GPE (16:0/18:1)	LC/MS pos late	19263			5283496		2.1	1.01	1.23	1.84	0.92	1.63	0.54	0.62087		1.8122e-06	2.227e-06	0.8143	0.177	0.0006	0.0006	0.0101	0.0021	0.1809	0.0682	3.0949e-05	6.364e-05	0.0003	0.0002	7.46788e-06			0.8175	1.7138	0.8289	1.0081	1.5066	0.7483	1.3291	1.3167	0.7173		100	100	100
	856			1-palmitoyl-2-oleoyl-GPC (16:0/18:1)	LC/MS pos late	52461			6436017		2.07	1.17	1.15	1.53	1.17	1.73	0.57	0.592378		0.0017	0.0004	0.0649	0.0276	0.0223	0.009	0.0605	0.0091	0.0429	0.0202	0.0003	0.0003	0.003	0.0014	2.31111e-05			0.8192	1.6936	0.9596	0.9401	1.2506	0.9602	1.4136	1.3829	0.7846		100	100	100
	857			1,2-dipalmitoyl-GPG (16:0/16:0)	LC/MS pos late	52625			11846227		1.5	1.05	1.19	1.23	0.88	1.24	0.66	0.732695		1.3142e-05	9.3069e-06	0.0491	0.0225	0.0001	0.0002	0.0513	0.0079	0.0102	0.0061	0.001	0.0008	0.0017	0.0009	1.01198e-05			0.8722	1.3052	0.9196	1.0395	1.0731	0.7659	1.0838	1.1904	0.7821		100	100	100
	858			1-palmitoyl-2-linoleoyl-GPG (16:0/18:2)	LC/MS pos late	52628					1.66	0.97	1.28	1.61	1.1	1.61	1.15	0.858138		0.0004	0.0001	0.3729	0.1014	0.0047	0.0027	0.0207	0.0037	0.0892	0.0368	0.0005	0.0005	0.4545	0.0895	1.31982e-05			0.8009	1.3322	0.7731	1.0267	1.2868	0.8802	1.2899	0.9333	1.0755		100	100	100
	861			1,2-dilinoleoyl-GPC (18:2/18:2)	LC/MS pos late	52603			5288075		1.19	0.83	1.15	1.97	1.03	1.98	0.79	0.724505		0.02	0.0029	0.139	0.0492	0.0238	0.0095	0.0339	0.0056	0.5773	0.1675	4.1837e-05	7.2319e-05	0.3565	0.0724	0.00062012			0.8973	1.0719	0.7426	1.0338	1.7688	0.9234	1.7732	1.2385	0.9781		100	100	100
	862			1,2-dilinoleoyl-GPA (18:2/18:2)*	LC/MS pos late	52680					1.01	0.7	0.94	0.57	0.72	0.72				0.606	0.0638	0.0001	0.0003	0.1049	0.0309	0.0241	0.0042	0.0005	0.0006	6.391e-05	9.276e-05						1.3371	1.3535	0.9353	1.257	0.7599	0.9627	0.9626				100	100	100
	864			1-linoleoyl-2-linolenoyl-GPA (18:2/18:3)*	LC/MS pos late	52695					0.97	0.72	0.92	0.51	0.55	0.61	0.91	1.26219		0.3772	0.041	0.0202	0.0121	0.0015	0.0012	0.0395	0.0063	5.915e-08	1.5621e-06	0.0023	0.0016	0.1495	0.035	3.98322e-05			1.3258	1.2851	0.9602	1.2193	0.6719	0.7308	0.8144	1.0504	0.9546		100	100	100
[truncated: 168 more rows]
[truncated: 17 more columns]

## Sheet: metabolite date
														SAMPLE NAME	UNAZ-00414	UNAZ-00415	UNAZ-00416	UNAZ-00417	UNAZ-00436	UNAZ-00437	UNAZ-00438	UNAZ-00439
[truncated: 450 more rows]

## Sheet: Box Plots 2 Pathway
		Biochemical Name	Super Pathway	Sub Pathway	Pathway Order	ALPHA	Platform	Comp ID
[truncated: 441 more rows]

[truncated: 1 more sheets: Bar charts Pathway]
